# Supplementary material for: Liver mitochondria-associated endoplasmic reticulum membrane proteomics for studying the effects of ZiBuPiYin recipe on Zucker diabetic fatty rats after chronic psychological stress
Source: Frontiers journal article supplement (doi:10.3389/fcell.2022.995732), 2022-11-03
Supplement: Data_Sheet_1.zip [file Data_Sheet_1.zip]

## Sheet: GO.bp enrich
Supporting information Table 3a. Biological process enrichment analysis based on dynamic clustering by different categories.
Cluster	Terms	Mapping	All.mapping	Background	All.background	Fold.enrich	p.value	Protein.IDs	Type
Cluster1	RNA localization	1	3	250	22870	30.49	0.0324	Q9Z1E1	GO_BP
Cluster1	RNA transport	1	3	217	22870	35.13	0.0282	Q9Z1E1	GO_BP
Cluster1	anatomical structure development	1	3	8303	22870	0.92	0.742	Q9Z1E1	GO_BP
Cluster1	anatomical structure morphogenesis	1	3	3517	22870	2.17	0.394	Q9Z1E1	GO_BP
Cluster1	arachidonic acid metabolic process	1	3	155	22870	49.18	0.0202	P51869	GO_BP
Cluster1	axon development	1	3	709	22870	10.75	0.0902	Q9Z1E1	GO_BP
Cluster1	axon guidance	1	3	404	22870	18.87	0.0521	Q9Z1E1	GO_BP
Cluster1	axonogenesis	1	3	651	22870	11.71	0.083	Q9Z1E1	GO_BP
Cluster1	biological regulation	2	3	16872	22870	0.9	0.83	Q3MIE4 Q9Z1E1	GO_BP
Cluster1	carboxylic acid metabolic process	1	3	1484	22870	5.14	0.182	P51869	GO_BP
Cluster1	cell activation	1	3	1643	22870	4.64	0.2	Q3MIE4	GO_BP
Cluster1	cell activation involved in immune response	1	3	900	22870	8.47	0.113	Q3MIE4	GO_BP
Cluster1	cell communication	1	3	7722	22870	0.99	0.709	Q9Z1E1	GO_BP
Cluster1	cell development	1	3	2718	22870	2.8	0.316	Q9Z1E1	GO_BP
Cluster1	cell differentiation	1	3	5481	22870	1.39	0.56	Q9Z1E1	GO_BP
Cluster1	cell morphogenesis	1	3	1228	22870	6.21	0.153	Q9Z1E1	GO_BP
Cluster1	cell morphogenesis involved in differentiation	1	3	979	22870	7.79	0.123	Q9Z1E1	GO_BP
Cluster1	cell part morphogenesis	1	3	960	22870	7.94	0.121	Q9Z1E1	GO_BP
Cluster1	cell projection morphogenesis	1	3	904	22870	8.43	0.114	Q9Z1E1	GO_BP
Cluster1	cell projection organization	1	3	1868	22870	4.08	0.226	Q9Z1E1	GO_BP
Cluster1	cellular component assembly	1	3	3682	22870	2.07	0.409	Q9Z1E1	GO_BP
Cluster1	cellular component biogenesis	1	3	3986	22870	1.91	0.437	Q9Z1E1	GO_BP
Cluster1	cellular component disassembly	1	3	537	22870	14.2	0.0688	Q9Z1E1	GO_BP
Cluster1	cellular component morphogenesis	1	3	1413	22870	5.4	0.174	Q9Z1E1	GO_BP
Cluster1	cellular component organization	1	3	8025	22870	0.95	0.727	Q9Z1E1	GO_BP
Cluster1	cellular component organization or biogenesis	1	3	8281	22870	0.92	0.74	Q9Z1E1	GO_BP
Cluster1	cellular developmental process	1	3	5612	22870	1.36	0.57	Q9Z1E1	GO_BP
Cluster1	cellular lipid metabolic process	1	3	1535	22870	4.97	0.188	P51869	GO_BP
Cluster1	cellular localization	1	3	3451	22870	2.21	0.388	Q9Z1E1	GO_BP
Cluster1	cellular macromolecule localization	1	3	2067	22870	3.69	0.247	Q9Z1E1	GO_BP
Cluster1	cellular metabolic process	1	3	11003	22870	0.69	0.86	P51869	GO_BP
Cluster1	cellular process	3	3	19704	22870	1.16	0.64	P51869 Q3MIE4 Q9Z1E1	GO_BP
Cluster1	cellular protein localization	1	3	2052	22870	3.72	0.246	Q9Z1E1	GO_BP
Cluster1	cellular response to chemical stimulus	1	3	4748	22870	1.61	0.502	Q9Z1E1	GO_BP
Cluster1	cellular response to dsRNA	1	3	79	22870	96.5	0.0103	Q9Z1E1	GO_BP
Cluster1	cellular response to exogenous dsRNA	1	3	21	22870	363.02	0.00275	Q9Z1E1	GO_BP
Cluster1	cellular response to nitrogen compound	1	3	1312	22870	5.81	0.162	Q9Z1E1	GO_BP
Cluster1	cellular response to organic cyclic compound	1	3	1038	22870	7.34	0.13	Q9Z1E1	GO_BP
Cluster1	cellular response to organic substance	1	3	3910	22870	1.95	0.43	Q9Z1E1	GO_BP
Cluster1	cellular response to stimulus	1	3	9488	22870	0.8	0.8	Q9Z1E1	GO_BP
Cluster1	cellular response to stress	1	3	2536	22870	3.01	0.297	Q9Z1E1	GO_BP
Cluster1	chemotaxis	1	3	813	22870	9.38	0.103	Q9Z1E1	GO_BP
Cluster1	developmental process	1	3	8750	22870	0.87	0.765	Q9Z1E1	GO_BP
Cluster1	dsRNA transport	1	3	4	22870	1905.83	0.000525	Q9Z1E1	GO_BP
Cluster1	endocytosis	1	3	746	22870	10.22	0.0947	Q9Z1E1	GO_BP
Cluster1	endomembrane system organization	1	3	526	22870	14.49	0.0674	Q9Z1E1	GO_BP
Cluster1	establishment of RNA localization	1	3	220	22870	34.65	0.0286	Q9Z1E1	GO_BP
Cluster1	establishment of localization	2	3	6266	22870	2.43	0.184	Q3MIE4 Q9Z1E1	GO_BP
Cluster1	exocytosis	1	3	1144	22870	6.66	0.143	Q3MIE4	GO_BP
Cluster1	extracellular matrix disassembly	1	3	88	22870	86.63	0.0115	Q9Z1E1	GO_BP
Cluster1	extracellular matrix organization	1	3	490	22870	15.56	0.0629	Q9Z1E1	GO_BP
Cluster1	extracellular structure organization	1	3	560	22870	13.61	0.0717	Q9Z1E1	GO_BP
Cluster1	fatty acid derivative metabolic process	1	3	339	22870	22.49	0.0438	P51869	GO_BP
Cluster1	fatty acid metabolic process	1	3	589	22870	12.94	0.0753	P51869	GO_BP
Cluster1	generation of neurons	1	3	2750	22870	2.77	0.319	Q9Z1E1	GO_BP
Cluster1	granulocyte activation	1	3	719	22870	10.6	0.0914	Q3MIE4	GO_BP
Cluster1	icosanoid metabolic process	1	3	258	22870	29.55	0.0335	P51869	GO_BP
Cluster1	immune effector process	1	3	1320	22870	5.78	0.163	Q3MIE4	GO_BP
Cluster1	immune response	1	3	2036	22870	3.74	0.244	Q3MIE4	GO_BP
Cluster1	immune system process	1	3	3481	22870	2.19	0.391	Q3MIE4	GO_BP
Cluster1	import into cell	1	3	859	22870	8.87	0.109	Q9Z1E1	GO_BP
Cluster1	intracellular signal transduction	1	3	2366	22870	3.22	0.279	Q9Z1E1	GO_BP
Cluster1	leukocyte activation	1	3	1426	22870	5.35	0.176	Q3MIE4	GO_BP
Cluster1	leukocyte activation involved in immune response	1	3	895	22870	8.52	0.113	Q3MIE4	GO_BP
Cluster1	leukocyte degranulation	1	3	729	22870	10.46	0.0926	Q3MIE4	GO_BP
Cluster1	leukocyte mediated immunity	1	3	954	22870	7.99	0.12	Q3MIE4	GO_BP
Cluster1	lipid metabolic process	1	3	1854	22870	4.11	0.224	P51869	GO_BP
Cluster1	localization	2	3	7927	22870	1.92	0.277	Q3MIE4 Q9Z1E1	GO_BP
Cluster1	locomotion	1	3	1924	22870	3.96	0.232	Q9Z1E1	GO_BP
Cluster1	long-chain fatty acid metabolic process	1	3	255	22870	29.9	0.0331	P51869	GO_BP
Cluster1	macromolecular complex assembly	1	3	2356	22870	3.24	0.278	Q9Z1E1	GO_BP
Cluster1	macromolecular complex subunit organization	1	3	2735	22870	2.79	0.318	Q9Z1E1	GO_BP
Cluster1	macromolecule localization	1	3	3092	22870	2.47	0.353	Q9Z1E1	GO_BP
Cluster1	membrane assembly	1	3	68	22870	112.11	0.00889	Q9Z1E1	GO_BP
Cluster1	membrane biogenesis	1	3	81	22870	94.12	0.0106	Q9Z1E1	GO_BP
Cluster1	membrane organization	1	3	1187	22870	6.42	0.148	Q9Z1E1	GO_BP
Cluster1	membrane raft assembly	1	3	28	22870	272.26	0.00367	Q9Z1E1	GO_BP
Cluster1	membrane raft organization	1	3	46	22870	165.72	0.00602	Q9Z1E1	GO_BP
Cluster1	metabolic process	1	3	11902	22870	0.64	0.89	P51869	GO_BP
Cluster1	modulation of synaptic transmission	1	3	729	22870	10.46	0.0926	Q9Z1E1	GO_BP
Cluster1	monocarboxylic acid metabolic process	1	3	920	22870	8.29	0.116	P51869	GO_BP
Cluster1	movement of cell or subcellular component	1	3	2248	22870	3.39	0.267	Q9Z1E1	GO_BP
Cluster1	multicellular organism development	1	3	7713	22870	0.99	0.709	Q9Z1E1	GO_BP
Cluster1	multicellular organismal process	1	3	10426	22870	0.73	0.839	Q9Z1E1	GO_BP
Cluster1	myeloid leukocyte activation	1	3	874	22870	8.72	0.11	Q3MIE4	GO_BP
Cluster1	myeloid leukocyte mediated immunity	1	3	758	22870	10.06	0.0962	Q3MIE4	GO_BP
Cluster1	negative regulation of biological process	1	3	8114	22870	0.94	0.731	Q3MIE4	GO_BP
Cluster1	negative regulation of cellular process	1	3	7349	22870	1.04	0.687	Q3MIE4	GO_BP
Cluster1	negative regulation of developmental process	1	3	1739	22870	4.38	0.211	Q3MIE4	GO_BP
Cluster1	negative regulation of mitochondrial fusion	1	3	12	22870	635.28	0.00157	Q3MIE4	GO_BP
Cluster1	negative regulation of mitochondrion organization	1	3	107	22870	71.25	0.014	Q3MIE4	GO_BP
Cluster1	negative regulation of organelle organization	1	3	618	22870	12.34	0.0789	Q3MIE4	GO_BP
Cluster1	nervous system development	1	3	4016	22870	1.9	0.44	Q9Z1E1	GO_BP
Cluster1	neurogenesis	1	3	2936	22870	2.6	0.338	Q9Z1E1	GO_BP
Cluster1	neuron development	1	3	1449	22870	5.26	0.178	Q9Z1E1	GO_BP
Cluster1	neuron differentiation	1	3	1777	22870	4.29	0.215	Q9Z1E1	GO_BP
Cluster1	neuron projection development	1	3	1210	22870	6.3	0.15	Q9Z1E1	GO_BP
Cluster1	neuron projection guidance	1	3	405	22870	18.82	0.0522	Q9Z1E1	GO_BP
Cluster1	neuron projection morphogenesis	1	3	879	22870	8.67	0.111	Q9Z1E1	GO_BP
Cluster1	neutrophil activation	1	3	714	22870	10.68	0.0908	Q3MIE4	GO_BP
Cluster1	neutrophil activation involved in immune response	1	3	701	22870	10.87	0.0892	Q3MIE4	GO_BP
Cluster1	neutrophil degranulation	1	3	696	22870	10.95	0.0886	Q3MIE4	GO_BP
Cluster1	neutrophil mediated immunity	1	3	720	22870	10.59	0.0915	Q3MIE4	GO_BP
Cluster1	nitrogen compound transport	1	3	2099	22870	3.63	0.251	Q9Z1E1	GO_BP
Cluster1	nucleic acid transport	1	3	217	22870	35.13	0.0282	Q9Z1E1	GO_BP
Cluster1	nucleobase-containing compound transport	1	3	272	22870	28.03	0.0353	Q9Z1E1	GO_BP
Cluster1	organic acid metabolic process	1	3	1633	22870	4.67	0.199	P51869	GO_BP
Cluster1	organic substance metabolic process	1	3	11441	22870	0.67	0.875	P51869	GO_BP
Cluster1	organic substance transport	1	3	2613	22870	2.92	0.305	Q9Z1E1	GO_BP
Cluster1	oxidation-reduction process	1	3	1420	22870	5.37	0.175	P51869	GO_BP
Cluster1	oxoacid metabolic process	1	3	1610	22870	4.73	0.197	P51869	GO_BP
Cluster1	plasma membrane organization	1	3	116	22870	65.72	0.0151	Q9Z1E1	GO_BP
Cluster1	plasma membrane raft assembly	1	3	9	22870	847.04	0.00118	Q9Z1E1	GO_BP
Cluster1	plasma membrane raft organization	1	3	9	22870	847.04	0.00118	Q9Z1E1	GO_BP
Cluster1	positive regulation of binding	1	3	330	22870	23.1	0.0427	Q9Z1E1	GO_BP
Cluster1	positive regulation of biological process	1	3	9166	22870	0.83	0.785	Q9Z1E1	GO_BP
Cluster1	positive regulation of cell adhesion	1	3	727	22870	10.49	0.0924	Q9Z1E1	GO_BP
Cluster1	positive regulation of cell communication	1	3	2894	22870	2.63	0.334	Q9Z1E1	GO_BP
Cluster1	positive regulation of cell differentiation	1	3	1886	22870	4.04	0.228	Q9Z1E1	GO_BP
Cluster1	positive regulation of cell junction assembly	1	3	68	22870	112.11	0.00889	Q9Z1E1	GO_BP
Cluster1	positive regulation of cell-cell adhesion	1	3	439	22870	17.37	0.0565	Q9Z1E1	GO_BP
Cluster1	positive regulation of cellular metabolic process	1	3	5101	22870	1.49	0.531	Q9Z1E1	GO_BP
Cluster1	positive regulation of cellular process	1	3	8277	22870	0.92	0.74	Q9Z1E1	GO_BP
Cluster1	positive regulation of cytokine production	1	3	769	22870	9.91	0.0975	Q9Z1E1	GO_BP
Cluster1	positive regulation of defense response	1	3	621	22870	12.28	0.0793	Q9Z1E1	GO_BP
Cluster1	positive regulation of developmental process	1	3	2567	22870	2.97	0.3	Q9Z1E1	GO_BP
Cluster1	positive regulation of endocytosis	1	3	362	22870	21.06	0.0467	Q9Z1E1	GO_BP
Cluster1	positive regulation of immune response	1	3	974	22870	7.83	0.122	Q9Z1E1	GO_BP
Cluster1	positive regulation of immune system process	1	3	1521	22870	5.01	0.187	Q9Z1E1	GO_BP
Cluster1	positive regulation of innate immune response	1	3	399	22870	19.11	0.0514	Q9Z1E1	GO_BP
Cluster1	positive regulation of interferon-beta production	1	3	43	22870	177.29	0.00563	Q9Z1E1	GO_BP
Cluster1	positive regulation of metabolic process	1	3	5510	22870	1.38	0.563	Q9Z1E1	GO_BP
Cluster1	positive regulation of molecular function	1	3	2896	22870	2.63	0.334	Q9Z1E1	GO_BP
Cluster1	positive regulation of muscle cell differentiation	1	3	172	22870	44.32	0.0224	Q9Z1E1	GO_BP
Cluster1	positive regulation of muscle organ development	1	3	139	22870	54.84	0.0181	Q9Z1E1	GO_BP
Cluster1	positive regulation of muscle tissue development	1	3	140	22870	54.45	0.0183	Q9Z1E1	GO_BP
Cluster1	positive regulation of myoblast fusion	1	3	28	22870	272.26	0.00367	Q9Z1E1	GO_BP
Cluster1	positive regulation of myotube differentiation	1	3	54	22870	141.17	0.00707	Q9Z1E1	GO_BP
Cluster1	positive regulation of phosphate metabolic process	1	3	1917	22870	3.98	0.231	Q9Z1E1	GO_BP
Cluster1	positive regulation of phosphorylation	1	3	1789	22870	4.26	0.217	Q9Z1E1	GO_BP
Cluster1	positive regulation of protein binding	1	3	177	22870	43.07	0.023	Q9Z1E1	GO_BP
Cluster1	positive regulation of protein metabolic process	1	3	2743	22870	2.78	0.318	Q9Z1E1	GO_BP
Cluster1	positive regulation of protein phosphorylation	1	3	1683	22870	4.53	0.205	Q9Z1E1	GO_BP
Cluster1	positive regulation of response to stimulus	1	3	3523	22870	2.16	0.395	Q9Z1E1	GO_BP
Cluster1	positive regulation of signal transduction	1	3	2586	22870	2.95	0.302	Q9Z1E1	GO_BP
Cluster1	positive regulation of signaling	1	3	2896	22870	2.63	0.334	Q9Z1E1	GO_BP
Cluster1	positive regulation of synaptic transmission	1	3	305	22870	24.99	0.0395	Q9Z1E1	GO_BP
Cluster1	positive regulation of transport	1	3	2019	22870	3.78	0.242	Q9Z1E1	GO_BP
Cluster1	primary metabolic process	1	3	10879	22870	0.7	0.856	P51869	GO_BP
Cluster1	protein homooligomerization	1	3	531	22870	14.36	0.0681	Q9Z1E1	GO_BP
Cluster1	protein kinase C signaling	1	3	25	22870	304.93	0.00328	Q9Z1E1	GO_BP
Cluster1	protein localization	1	3	2654	22870	2.87	0.309	Q9Z1E1	GO_BP
Cluster1	protein localization to cell periphery	1	3	337	22870	22.62	0.0436	Q9Z1E1	GO_BP
Cluster1	protein localization to membrane	1	3	687	22870	11.1	0.0874	Q9Z1E1	GO_BP
Cluster1	protein localization to membrane raft	1	3	21	22870	363.02	0.00275	Q9Z1E1	GO_BP
Cluster1	protein localization to plasma membrane	1	3	287	22870	26.56	0.0372	Q9Z1E1	GO_BP
Cluster1	protein oligomerization	1	3	900	22870	8.47	0.113	Q9Z1E1	GO_BP
Cluster1	protein stabilization	1	3	306	22870	24.91	0.0396	Q9Z1E1	GO_BP
Cluster1	regulated exocytosis	1	3	1053	22870	7.24	0.132	Q3MIE4	GO_BP
Cluster1	regulation of Ras protein signal transduction	1	3	238	22870	32.03	0.0309	Q9Z1E1	GO_BP
Cluster1	regulation of Rho protein signal transduction	1	3	107	22870	71.25	0.014	Q9Z1E1	GO_BP
Cluster1	regulation of anatomical structure morphogenesis	2	3	1884	22870	8.09	0.0192	Q3MIE4 Q9Z1E1	GO_BP
Cluster1	regulation of binding	1	3	661	22870	11.53	0.0842	Q9Z1E1	GO_BP
Cluster1	regulation of biological process	2	3	15881	22870	0.96	0.777	Q3MIE4 Q9Z1E1	GO_BP
Cluster1	regulation of biological quality	1	3	6318	22870	1.21	0.621	Q9Z1E1	GO_BP
Cluster1	regulation of cell adhesion	1	3	1168	22870	6.53	0.146	Q9Z1E1	GO_BP
Cluster1	regulation of cell adhesion molecule production	1	3	29	22870	262.87	0.0038	Q9Z1E1	GO_BP
Cluster1	regulation of cell communication	1	3	5314	22870	1.43	0.548	Q9Z1E1	GO_BP
Cluster1	regulation of cell differentiation	1	3	3200	22870	2.38	0.364	Q9Z1E1	GO_BP
Cluster1	regulation of cell junction assembly	1	3	166	22870	45.92	0.0216	Q9Z1E1	GO_BP
Cluster1	regulation of cell-cell adhesion	1	3	673	22870	11.33	0.0857	Q9Z1E1	GO_BP
Cluster1	regulation of cellular component biogenesis	1	3	1534	22870	4.97	0.188	Q9Z1E1	GO_BP
Cluster1	regulation of cellular component organization	2	3	4154	22870	3.67	0.087	Q3MIE4 Q9Z1E1	GO_BP
Cluster1	regulation of cellular metabolic process	1	3	8528	22870	0.89	0.753	Q9Z1E1	GO_BP
Cluster1	regulation of cellular process	2	3	15001	22870	1.02	0.726	Q3MIE4 Q9Z1E1	GO_BP
Cluster1	regulation of cellular protein metabolic process	1	3	4057	22870	1.88	0.443	Q9Z1E1	GO_BP
Cluster1	regulation of cytokine production	1	3	1170	22870	6.52	0.146	Q9Z1E1	GO_BP
Cluster1	regulation of defense response	1	3	1170	22870	6.52	0.146	Q9Z1E1	GO_BP
Cluster1	regulation of developmental process	2	3	4368	22870	3.49	0.0955	Q3MIE4 Q9Z1E1	GO_BP
Cluster1	regulation of endocytosis	1	3	531	22870	14.36	0.0681	Q9Z1E1	GO_BP
Cluster1	regulation of heterotypic cell-cell adhesion	1	3	35	22870	217.81	0.00458	Q9Z1E1	GO_BP
Cluster1	regulation of immune response	1	3	1463	22870	5.21	0.18	Q9Z1E1	GO_BP
Cluster1	regulation of immune system process	1	3	2296	22870	3.32	0.272	Q9Z1E1	GO_BP
Cluster1	regulation of innate immune response	1	3	575	22870	13.26	0.0735	Q9Z1E1	GO_BP
Cluster1	regulation of interferon-beta production	1	3	73	22870	104.43	0.00955	Q9Z1E1	GO_BP
Cluster1	regulation of intracellular signal transduction	1	3	2888	22870	2.64	0.333	Q9Z1E1	GO_BP
Cluster1	regulation of localization	1	3	4630	22870	1.65	0.493	Q9Z1E1	GO_BP
Cluster1	regulation of macromolecule metabolic process	1	3	8454	22870	0.9	0.75	Q9Z1E1	GO_BP
Cluster1	regulation of metabolic process	1	3	9230	22870	0.83	0.788	Q9Z1E1	GO_BP
Cluster1	regulation of mitochondrial fusion	1	3	19	22870	401.23	0.00249	Q3MIE4	GO_BP
Cluster1	regulation of mitochondrion organization	1	3	287	22870	26.56	0.0372	Q3MIE4	GO_BP
Cluster1	regulation of molecular function	1	3	5189	22870	1.47	0.538	Q9Z1E1	GO_BP
Cluster1	regulation of multicellular organismal development	1	3	3549	22870	2.15	0.397	Q9Z1E1	GO_BP
Cluster1	regulation of multicellular organismal process	1	3	5190	22870	1.47	0.538	Q9Z1E1	GO_BP
Cluster1	regulation of muscle cell differentiation	1	3	286	22870	26.66	0.0371	Q9Z1E1	GO_BP
Cluster1	regulation of muscle organ development	1	3	257	22870	29.66	0.0333	Q9Z1E1	GO_BP
Cluster1	regulation of muscle tissue development	1	3	258	22870	29.55	0.0335	Q9Z1E1	GO_BP
Cluster1	regulation of myoblast fusion	1	3	31	22870	245.91	0.00406	Q9Z1E1	GO_BP
Cluster1	regulation of myotube differentiation	1	3	86	22870	88.64	0.0112	Q9Z1E1	GO_BP
Cluster1	regulation of nitrogen compound metabolic process	1	3	8051	22870	0.95	0.728	Q9Z1E1	GO_BP
Cluster1	regulation of organelle organization	1	3	1963	22870	3.88	0.236	Q3MIE4	GO_BP
Cluster1	regulation of phosphate metabolic process	1	3	2877	22870	2.65	0.332	Q9Z1E1	GO_BP
Cluster1	regulation of phosphorus metabolic process	1	3	2878	22870	2.65	0.332	Q9Z1E1	GO_BP
Cluster1	regulation of phosphorylation	1	3	2546	22870	2.99	0.298	Q9Z1E1	GO_BP
Cluster1	regulation of primary metabolic process	1	3	8360	22870	0.91	0.745	Q9Z1E1	GO_BP
Cluster1	regulation of protein binding	1	3	415	22870	18.37	0.0535	Q9Z1E1	GO_BP
Cluster1	regulation of protein metabolic process	1	3	4370	22870	1.74	0.471	Q9Z1E1	GO_BP
Cluster1	regulation of protein modification process	1	3	2939	22870	2.59	0.338	Q9Z1E1	GO_BP
Cluster1	regulation of protein phosphorylation	1	3	2338	22870	3.26	0.276	Q9Z1E1	GO_BP
Cluster1	regulation of protein stability	1	3	448	22870	17.02	0.0576	Q9Z1E1	GO_BP
Cluster1	regulation of receptor internalization	1	3	92	22870	82.86	0.012	Q9Z1E1	GO_BP
Cluster1	regulation of receptor-mediated endocytosis	1	3	170	22870	44.84	0.0221	Q9Z1E1	GO_BP
Cluster1	regulation of response to stimulus	1	3	6136	22870	1.24	0.608	Q9Z1E1	GO_BP
Cluster1	regulation of response to stress	1	3	2241	22870	3.4	0.266	Q9Z1E1	GO_BP
Cluster1	regulation of signal transduction	1	3	4695	22870	1.62	0.498	Q9Z1E1	GO_BP
Cluster1	regulation of signaling	1	3	5357	22870	1.42	0.551	Q9Z1E1	GO_BP
Cluster1	regulation of skeletal muscle tissue development	1	3	99	22870	77	0.0129	Q9Z1E1	GO_BP
Cluster1	regulation of striated muscle cell differentiation	1	3	189	22870	40.34	0.0246	Q9Z1E1	GO_BP
Cluster1	regulation of striated muscle tissue development	1	3	253	22870	30.13	0.0328	Q9Z1E1	GO_BP
Cluster1	regulation of synaptic transmission, dopaminergic	1	3	34	22870	224.22	0.00445	Q9Z1E1	GO_BP
Cluster1	regulation of toll-like receptor signaling pathway	1	3	114	22870	66.87	0.0149	Q9Z1E1	GO_BP
Cluster1	regulation of transport	1	3	3340	22870	2.28	0.377	Q9Z1E1	GO_BP
Cluster1	regulation of type I interferon production	1	3	154	22870	49.5	0.0201	Q9Z1E1	GO_BP
Cluster1	regulation of vesicle-mediated transport	1	3	1004	22870	7.59	0.126	Q9Z1E1	GO_BP
Cluster1	response to chemical	2	3	7348	22870	2.07	0.243	P51869 Q9Z1E1	GO_BP
Cluster1	response to dsRNA	1	3	114	22870	66.87	0.0149	Q9Z1E1	GO_BP
Cluster1	response to endoplasmic reticulum stress	1	3	362	22870	21.06	0.0467	Q9Z1E1	GO_BP
Cluster1	response to exogenous dsRNA	1	3	55	22870	138.61	0.0072	Q9Z1E1	GO_BP
Cluster1	response to external stimulus	1	3	3479	22870	2.19	0.39	Q9Z1E1	GO_BP
Cluster1	response to nitrogen compound	1	3	2321	22870	3.28	0.275	Q9Z1E1	GO_BP
Cluster1	response to organic cyclic compound	1	3	2215	22870	3.44	0.263	Q9Z1E1	GO_BP
Cluster1	response to organic substance	1	3	5305	22870	1.44	0.547	Q9Z1E1	GO_BP
Cluster1	response to stimulus	3	3	11927	22870	1.92	0.142	P51869 Q3MIE4 Q9Z1E1	GO_BP
Cluster1	response to stress	1	3	5256	22870	1.45	0.543	Q9Z1E1	GO_BP
Cluster1	response to toxic substance	1	3	1113	22870	6.85	0.139	P51869	GO_BP
Cluster1	secretion	1	3	1765	22870	4.32	0.214	Q3MIE4	GO_BP
Cluster1	secretion by cell	1	3	1556	22870	4.9	0.191	Q3MIE4	GO_BP
Cluster1	signal transduction	1	3	6900	22870	1.1	0.66	Q9Z1E1	GO_BP
Cluster1	signaling	1	3	7532	22870	1.01	0.698	Q9Z1E1	GO_BP
Cluster1	small molecule metabolic process	1	3	2879	22870	2.65	0.332	P51869	GO_BP
Cluster1	system development	1	3	7194	22870	1.06	0.678	Q9Z1E1	GO_BP
Cluster1	taxis	1	3	818	22870	9.32	0.104	Q9Z1E1	GO_BP
Cluster1	transport	2	3	6073	22870	2.51	0.174	Q3MIE4 Q9Z1E1	GO_BP
Cluster1	unsaturated fatty acid metabolic process	1	3	233	22870	32.72	0.0303	P51869	GO_BP
Cluster1	vesicle-mediated transport	2	3	2512	22870	6.07	0.0335	Q3MIE4 Q9Z1E1	GO_BP
Cluster2	'de novo' posttranslational protein folding	1	58	35	22870	11.27	0.0851	P26772	GO_BP
Cluster2	'de novo' protein folding	2	58	54	22870	14.6	0.00831	P26772 P63039	GO_BP
Cluster2	2'-deoxyribonucleotide metabolic process	1	58	48	22870	8.21	0.115	Q6P2A5	GO_BP
Cluster2	2-oxoglutarate metabolic process	1	58	34	22870	11.6	0.0828	Q64602	GO_BP
Cluster2	4-hydroxyproline catabolic process	1	58	6	22870	65.72	0.0151	D4A2K1	GO_BP
Cluster2	4-hydroxyproline metabolic process	1	58	20	22870	19.72	0.0495	D4A2K1	GO_BP
Cluster2	ADP biosynthetic process	1	58	8	22870	49.29	0.0201	Q6P2A5	GO_BP
Cluster2	ADP metabolic process	1	58	106	22870	3.72	0.236	Q6P2A5	GO_BP
Cluster2	AMP metabolic process	1	58	25	22870	15.77	0.0615	Q6P2A5	GO_BP
Cluster2	AMP phosphorylation	1	58	3	22870	131.44	0.00759	Q6P2A5	GO_BP
Cluster2	ATP biosynthetic process	5	58	153	22870	12.89	4.32e-05	P12075 P19511 P21571 Q4FZT0 Q6P2A5	GO_BP
Cluster2	ATP metabolic process	8	58	319	22870	9.89	1.37e-06	D3ZLT1 P10888 P12075 P19511 P21571 Q4FZT0 Q5XIH3 Q6P2A5	GO_BP
Cluster2	ATP synthesis coupled electron transport	4	58	100	22870	15.77	0.000122	D3ZLT1 P10888 P12075 Q5XIH3	GO_BP
Cluster2	ATP synthesis coupled proton transport	4	58	35	22870	45.06	1.84e-06	P12075 P19511 P21571 Q4FZT0	GO_BP
Cluster2	B cell activation	1	58	237	22870	1.66	0.454	P63039	GO_BP
Cluster2	B cell activation involved in immune response	1	58	66	22870	5.97	0.155	P63039	GO_BP
Cluster2	B cell cytokine production	1	58	2	22870	197.16	0.00507	P63039	GO_BP
Cluster2	B cell mediated immunity	1	58	134	22870	2.94	0.289	P63039	GO_BP
Cluster2	B cell proliferation	1	58	64	22870	6.16	0.15	P63039	GO_BP
Cluster2	C21-steroid hormone biosynthetic process	1	58	37	22870	10.66	0.0897	P11915	GO_BP
Cluster2	C21-steroid hormone metabolic process	1	58	70	22870	5.63	0.163	P11915	GO_BP
Cluster2	CD4-positive, alpha-beta T cell activation	1	58	70	22870	5.63	0.163	Q4FZT0	GO_BP
Cluster2	DNA metabolic process	1	58	945	22870	0.42	0.914	P63039	GO_BP
Cluster2	DNA recombination	1	58	248	22870	1.59	0.469	P63039	GO_BP
Cluster2	GTP metabolic process	1	58	40	22870	9.86	0.0967	Q6P2A5	GO_BP
Cluster2	ITP metabolic process	1	58	3	22870	131.44	0.00759	Q6P2A5	GO_BP
Cluster2	L-alanine catabolic process	1	58	3	22870	131.44	0.00759	Q64565	GO_BP
Cluster2	L-alanine catabolic process, by transamination	1	58	1	22870	394.31	0.00254	Q64565	GO_BP
Cluster2	L-alanine metabolic process	1	58	5	22870	78.86	0.0126	Q64565	GO_BP
Cluster2	L-kynurenine metabolic process	1	58	7	22870	56.33	0.0176	Q64602	GO_BP
Cluster2	L-lysine catabolic process	1	58	3	22870	131.44	0.00759	A2VCW9	GO_BP
Cluster2	L-lysine metabolic process	1	58	3	22870	131.44	0.00759	A2VCW9	GO_BP
Cluster2	NAD metabolic process	1	58	145	22870	2.72	0.309	P04636	GO_BP
Cluster2	NADH dehydrogenase complex assembly	2	58	83	22870	9.5	0.0189	D3ZLT1 Q5XIH3	GO_BP
Cluster2	NADH metabolic process	1	58	94	22870	4.19	0.213	P04636	GO_BP
Cluster2	Sertoli cell development	1	58	46	22870	8.57	0.11	P97852	GO_BP
Cluster2	Sertoli cell differentiation	1	58	67	22870	5.89	0.157	P97852	GO_BP
Cluster2	T cell activation	3	58	396	22870	2.99	0.0792	F1M7X5 P63039 Q4FZT0	GO_BP
Cluster2	T cell costimulation	1	58	82	22870	4.81	0.188	F1M7X5	GO_BP
Cluster2	T cell receptor signaling pathway	1	58	149	22870	2.65	0.316	Q4FZT0	GO_BP
Cluster2	UTP metabolic process	1	58	4	22870	98.58	0.0101	Q6P2A5	GO_BP
Cluster2	acetyl-CoA biosynthetic process	1	58	23	22870	17.14	0.0568	P08461	GO_BP
Cluster2	acetyl-CoA biosynthetic process from pyruvate	1	58	15	22870	26.29	0.0374	P08461	GO_BP
Cluster2	acetyl-CoA metabolic process	1	58	50	22870	7.89	0.119	P08461	GO_BP
Cluster2	acid secretion	1	58	126	22870	3.13	0.274	P28492	GO_BP
Cluster2	acidic amino acid transport	1	58	60	22870	6.57	0.141	P28492	GO_BP
Cluster2	action potential	1	58	230	22870	1.71	0.444	P27615	GO_BP
Cluster2	activation of immune response	2	58	596	22870	1.32	0.448	P63039 Q4FZT0	GO_BP
Cluster2	activation of innate immune response	1	58	262	22870	1.51	0.488	P63039	GO_BP
Cluster2	acyl-CoA biosynthetic process	2	58	67	22870	11.77	0.0126	P08461 P18163	GO_BP
Cluster2	acyl-CoA metabolic process	8	58	166	22870	19	9.16e-09	D3ZIQ1 O55171 P07896 P08461 P11915 P18163 P97519 P97852	GO_BP
Cluster2	acylglycerol biosynthetic process	1	58	34	22870	11.6	0.0828	P18163	GO_BP
Cluster2	acylglycerol catabolic process	1	58	66	22870	5.97	0.155	P07756	GO_BP
Cluster2	acylglycerol metabolic process	2	58	166	22870	4.75	0.0665	P07756 P18163	GO_BP
Cluster2	adaptive immune response	1	58	303	22870	1.3	0.539	P63039	GO_BP
Cluster2	adiponectin-activated signaling pathway	1	58	9	22870	43.81	0.0226	P18163	GO_BP
Cluster2	aerobic electron transport chain	2	58	19	22870	41.51	0.00105	P10888 P12075	GO_BP
Cluster2	aerobic respiration	5	58	103	22870	19.14	6.37e-06	P04636 P10888 P12075 Q6AYQ8 Q9ER34	GO_BP
Cluster2	age-dependent general metabolic decline	1	58	5	22870	78.86	0.0126	P07895	GO_BP
Cluster2	age-dependent response to oxidative stress	1	58	5	22870	78.86	0.0126	P07895	GO_BP
Cluster2	age-dependent response to reactive oxygen species	1	58	1	22870	394.31	0.00254	P07895	GO_BP
Cluster2	aging	4	58	781	22870	2.02	0.136	P07895 P11915 P97852 Q5U4F4	GO_BP
Cluster2	alanine catabolic process	1	58	5	22870	78.86	0.0126	Q64565	GO_BP
Cluster2	alanine metabolic process	1	58	7	22870	56.33	0.0176	Q64565	GO_BP
Cluster2	alcohol biosynthetic process	1	58	154	22870	2.56	0.325	P11915	GO_BP
Cluster2	alcohol metabolic process	5	58	471	22870	4.19	0.00678	F1LN88 P11915 P97852 Q8VID1 Q9WVK3	GO_BP
Cluster2	aldehyde catabolic process	2	58	16	22870	49.29	0.000741	D4A2K1 Q64565	GO_BP
Cluster2	alpha-amino acid biosynthetic process	4	58	93	22870	16.96	9.19e-05	A2VCW9 P07756 P28492 Q64565	GO_BP
Cluster2	alpha-amino acid catabolic process	10	58	142	22870	27.77	2.5e-12	A2VCW9 D4A2K1 G3V7J0 P28492 P29266 P97519 Q5I0P2 Q64057 Q64565 Q64602	GO_BP
Cluster2	alpha-amino acid metabolic process	12	58	324	22870	14.6	2.66e-11	A2VCW9 D4A2K1 G3V7J0 P07756 P28492 P29266 P97519 P97532 Q5I0P2 Q64057 Q64565 Q64602	GO_BP
Cluster2	alpha-beta T cell activation	1	58	118	22870	3.34	0.259	Q4FZT0	GO_BP
Cluster2	alpha-linolenic acid metabolic process	2	58	20	22870	39.43	0.00117	D3ZHR2 P18163	GO_BP
Cluster2	ameboidal-type cell migration	1	58	258	22870	1.53	0.483	F1M7X5	GO_BP
Cluster2	amide biosynthetic process	4	58	806	22870	1.96	0.147	P07756 P08461 P18163 P85834	GO_BP
Cluster2	amide transport	13	58	1679	22870	3.05	0.000239	D3ZIQ1 O55171 P07896 P27615 P63039 P97519 P97576 Q2M2R8 Q5XIC0 Q642G4 Q8VID1 Q9WVK3 Q9Z2M4	GO_BP
Cluster2	amine catabolic process	2	58	33	22870	23.9	0.00317	Q64057 Q64602	GO_BP
Cluster2	amine metabolic process	2	58	91	22870	8.67	0.0224	Q64057 Q64602	GO_BP
Cluster2	amino acid transport	1	58	172	22870	2.29	0.355	P28492	GO_BP
Cluster2	amino-acid betaine biosynthetic process	1	58	9	22870	43.81	0.0226	G3V796	GO_BP
Cluster2	amino-acid betaine catabolic process	1	58	1	22870	394.31	0.00254	P15650	GO_BP
Cluster2	amino-acid betaine metabolic process	2	58	26	22870	30.33	0.00198	G3V796 P15650	GO_BP
Cluster2	ammonium ion metabolic process	3	58	289	22870	4.09	0.037	G3V796 P15650 Q64057	GO_BP
Cluster2	anatomical structure development	14	58	8303	22870	0.66	0.983	F1LN88 G3V796 G3V7I0 P07756 P07895 P27615 P63039 P97519 P97532 P97852 Q2M2R8 Q5U4F4 Q6P2A5 Q9ER34	GO_BP
Cluster2	androgen metabolic process	1	58	76	22870	5.19	0.176	P97852	GO_BP
Cluster2	animal organ development	11	58	5308	22870	0.82	0.821	F1LN88 G3V796 G3V7I0 P07756 P07895 P97519 P97532 P97852 Q2M2R8 Q6P2A5 Q9ER34	GO_BP
Cluster2	anion homeostasis	1	58	82	22870	4.81	0.188	P07756	GO_BP
Cluster2	anion transport	4	58	881	22870	1.79	0.184	D3ZHR2 P11915 P18163 P28492	GO_BP
Cluster2	antibiotic biosynthetic process	1	58	19	22870	20.75	0.0471	P07895	GO_BP
Cluster2	antibiotic catabolic process	1	58	66	22870	5.97	0.155	G3V7I0	GO_BP
Cluster2	antibiotic metabolic process	6	58	204	22870	11.6	1.29e-05	F1LN88 G3V7I0 P04636 P07895 Q6AYQ8 Q9ER34	GO_BP
Cluster2	antigen receptor-mediated signaling pathway	1	58	223	22870	1.77	0.434	Q4FZT0	GO_BP
Cluster2	apoptotic mitochondrial changes	2	58	114	22870	6.92	0.034	P07895 P63039	GO_BP
Cluster2	apoptotic process	3	58	1058	22870	1.12	0.506	G3V7I0 P07895 P63039	GO_BP
Cluster2	apoptotic signaling pathway	1	58	502	22870	0.79	0.724	P07895	GO_BP
Cluster2	arginine biosynthetic process	1	58	7	22870	56.33	0.0176	P07756	GO_BP
Cluster2	arginine metabolic process	1	58	26	22870	15.17	0.0639	P07756	GO_BP
Cluster2	aromatic amino acid family catabolic process	1	58	30	22870	13.14	0.0734	Q64602	GO_BP
Cluster2	aromatic amino acid family metabolic process	1	58	42	22870	9.39	0.101	Q64602	GO_BP
Cluster2	aromatic compound biosynthetic process	7	58	2150	22870	1.28	0.302	P08461 P12075 P18163 P19511 P21571 Q4FZT0 Q6P2A5	GO_BP
Cluster2	aromatic compound catabolic process	1	58	682	22870	0.58	0.828	Q64602	GO_BP
Cluster2	aspartate family amino acid biosynthetic process	1	58	37	22870	10.66	0.0897	A2VCW9	GO_BP
Cluster2	aspartate family amino acid catabolic process	3	58	31	22870	38.16	6.62e-05	A2VCW9 Q64057 Q64602	GO_BP
Cluster2	aspartate family amino acid metabolic process	3	58	83	22870	14.25	0.00123	A2VCW9 Q64057 Q64602	GO_BP
Cluster2	behavior	2	58	1179	22870	0.67	0.808	F1M7X5 P07895	GO_BP
Cluster2	behavioral defense response	1	58	81	22870	4.87	0.186	F1M7X5	GO_BP
Cluster2	behavioral fear response	1	58	78	22870	5.06	0.18	F1M7X5	GO_BP
Cluster2	benzene-containing compound metabolic process	1	58	57	22870	6.92	0.135	Q64602	GO_BP
Cluster2	beta-alanine catabolic process	1	58	2	22870	197.16	0.00507	G3V7J0	GO_BP
Cluster2	beta-alanine metabolic process	1	58	6	22870	65.72	0.0151	G3V7J0	GO_BP
Cluster2	biological regulation	25	58	16872	22870	0.58	1	F1LN88 F1M7X5 G3V796 G3V7I0 G3V7J0 P07756 P07895 P11915 P15650 P18163 P27615 P28492 P63039 P97576 P97852 Q2M2R8 Q4FZT0 Q5I0P2 Q5U4F4 Q64057 Q642G4 Q64565 Q6P2A5 Q8VID1 Q9WVK7	GO_BP
Cluster2	biosynthetic process	21	58	4691	22870	1.77	0.00412	A2VCW9 D4A2K1 G3V796 P04636 P07756 P07895 P08461 P11915 P12075 P18163 P19511 P21571 P28492 P85834 P97519 P97532 Q4FZT0 Q64565 Q6P2A5 Q9WVK3 Q9Z2M4	GO_BP
Cluster2	blood circulation	2	58	762	22870	1.03	0.58	P07756 P07895	GO_BP
Cluster2	blood coagulation	1	58	408	22870	0.97	0.648	Q6P2A5	GO_BP
Cluster2	brain development	2	58	1365	22870	0.58	0.868	Q2M2R8 Q6P2A5	GO_BP
Cluster2	branched-chain amino acid catabolic process	3	58	26	22870	45.5	3.86e-05	G3V7J0 P29266 P97519	GO_BP
Cluster2	branched-chain amino acid metabolic process	3	58	37	22870	31.97	0.000113	G3V7J0 P29266 P97519	GO_BP
Cluster2	brown fat cell differentiation	1	58	51	22870	7.73	0.122	G3V7J0	GO_BP
Cluster2	calcium ion homeostasis	1	58	778	22870	0.51	0.866	Q4FZT0	GO_BP
Cluster2	calcium ion transmembrane transport	1	58	332	22870	1.19	0.572	Q4FZT0	GO_BP
Cluster2	calcium ion transport	1	58	434	22870	0.91	0.671	Q4FZT0	GO_BP
Cluster2	carbamoyl phosphate biosynthetic process	1	58	1	22870	394.31	0.00254	P07756	GO_BP
Cluster2	carbamoyl phosphate metabolic process	1	58	1	22870	394.31	0.00254	P07756	GO_BP
Cluster2	carbohydrate biosynthetic process	2	58	181	22870	4.36	0.0772	G3V796 P04636	GO_BP
Cluster2	carbohydrate derivative biosynthetic process	7	58	890	22870	3.1	0.00706	P08461 P12075 P18163 P19511 P21571 Q4FZT0 Q6P2A5	GO_BP
Cluster2	carbohydrate derivative metabolic process	16	58	1630	22870	3.87	1.87e-06	D3ZIQ1 D3ZLT1 O55171 P07896 P08461 P10888 P11915 P12075 P18163 P19511 P21571 P97519 P97852 Q4FZT0 Q5XIH3 Q6P2A5	GO_BP
Cluster2	carbohydrate metabolic process	3	58	589	22870	2.01	0.188	F1LN88 G3V796 P04636	GO_BP
Cluster2	carboxylic acid biosynthetic process	7	58	572	22870	4.83	0.000588	A2VCW9 D4A2K1 P07756 P28492 Q64565 Q9WVK3 Q9Z2M4	GO_BP
Cluster2	carboxylic acid catabolic process	27	58	385	22870	27.65	8.37e-33	A2VCW9 B3DMA2 D3ZHR2 D3ZIQ1 D4A2K1 G3V796 G3V7J0 O55171 P07896 P13803 P14604 P15650 P28492 P29266 P97519 P97532 P97852 Q2M2R8 Q5I0P2 Q5XIC0 Q64057 Q64565 Q64602 Q9WVK3 Q9WVK7 Q9Z2M4 Q9Z311	GO_BP
Cluster2	carboxylic acid metabolic process	34	58	1484	22870	9.03	8.01e-26	A2VCW9 B3DMA2 D3ZHR2 D3ZIQ1 D4A2K1 G3V796 G3V7J0 O55171 P04636 P07756 P07896 P08461 P13803 P14604 P15650 P18163 P27615 P28492 P29266 P97519 P97532 P97852 Q2M2R8 Q5I0P2 Q5XIC0 Q64057 Q64565 Q64602 Q6AYQ8 Q9ER34 Q9WVK3 Q9WVK7 Q9Z2M4 Q9Z311	GO_BP
Cluster2	carboxylic acid transport	3	58	454	22870	2.61	0.108	D3ZHR2 P18163 P28492	GO_BP
Cluster2	cardiac muscle cell differentiation	1	58	177	22870	2.23	0.363	G3V796	GO_BP
Cluster2	cardiac muscle tissue development	1	58	329	22870	1.2	0.569	G3V796	GO_BP
Cluster2	cardiocyte differentiation	1	58	218	22870	1.81	0.427	G3V796	GO_BP
Cluster2	carnitine biosynthetic process	1	58	9	22870	43.81	0.0226	G3V796	GO_BP
Cluster2	carnitine catabolic process	1	58	1	22870	394.31	0.00254	P15650	GO_BP
Cluster2	carnitine metabolic process	2	58	24	22870	32.86	0.00168	G3V796 P15650	GO_BP
Cluster2	carnitine metabolic process, CoA-linked	2	58	5	22870	157.72	6.29e-05	G3V796 P15650	GO_BP
Cluster2	catabolic process	30	58	2611	22870	4.53	5.23e-14	A2VCW9 B3DMA2 D3ZHR2 D3ZIQ1 D4A2K1 G3V796 G3V7I0 G3V7J0 O55171 P07756 P07896 P13803 P14604 P15650 P18163 P28492 P29266 P97519 P97532 P97852 Q2M2R8 Q5I0P2 Q5XIC0 Q64057 Q64565 Q64602 Q9WVK3 Q9WVK7 Q9Z2M4 Q9Z311	GO_BP
Cluster2	cation homeostasis	2	58	1176	22870	0.67	0.806	P07895 Q4FZT0	GO_BP
Cluster2	cation transmembrane transport	5	58	1175	22870	1.68	0.177	P10888 P12075 P19511 P21571 Q4FZT0	GO_BP
Cluster2	cation transport	5	58	1432	22870	1.38	0.297	P10888 P12075 P19511 P21571 Q4FZT0	GO_BP
Cluster2	cell activation	3	58	1643	22870	0.72	0.796	F1M7X5 P63039 Q4FZT0	GO_BP
Cluster2	cell activation involved in immune response	1	58	900	22870	0.44	0.903	P63039	GO_BP
Cluster2	cell communication	5	58	7722	22870	0.26	1	P07895 P18163 P27615 P63039 Q4FZT0	GO_BP
Cluster2	cell death	3	58	1345	22870	0.88	0.671	G3V7I0 P07895 P63039	GO_BP
Cluster2	cell death in response to oxidative stress	1	58	46	22870	8.57	0.11	P07895	GO_BP
Cluster2	cell development	3	58	2718	22870	0.44	0.975	P07895 P97852 Q2M2R8	GO_BP
Cluster2	cell differentiation	8	58	5481	22870	0.58	0.981	G3V796 G3V7I0 G3V7J0 P07756 P07895 P27615 P97852 Q2M2R8	GO_BP
Cluster2	cell migration	2	58	1379	22870	0.57	0.872	F1M7X5 Q2M2R8	GO_BP
Cluster2	cell motility	2	58	1550	22870	0.51	0.911	F1M7X5 Q2M2R8	GO_BP
Cluster2	cell proliferation	1	58	1245	22870	0.32	0.961	P63039	GO_BP
Cluster2	cell surface receptor signaling pathway	3	58	3164	22870	0.37	0.991	P07895 P18163 Q4FZT0	GO_BP
Cluster2	cellular aldehyde metabolic process	4	58	104	22870	15.17	0.000142	D4A2K1 Q64057 Q64565 Q8VID1	GO_BP
Cluster2	cellular amide metabolic process	12	58	1251	22870	3.78	5.84e-05	B0BNJ4 D3ZIQ1 O55171 P07756 P07895 P07896 P08461 P11915 P18163 P85834 P97519 P97852	GO_BP
Cluster2	cellular amine metabolic process	2	58	85	22870	9.28	0.0197	Q64057 Q64602	GO_BP
Cluster2	cellular amino acid biosynthetic process	4	58	116	22870	13.6	0.000216	A2VCW9 P07756 P28492 Q64565	GO_BP
Cluster2	cellular amino acid catabolic process	11	58	173	22870	25.07	5.64e-13	A2VCW9 D4A2K1 G3V7J0 P28492 P29266 P97519 P97532 Q5I0P2 Q64057 Q64565 Q64602	GO_BP
Cluster2	cellular amino acid metabolic process	12	58	455	22870	10.4	1.3e-09	A2VCW9 D4A2K1 G3V7J0 P07756 P28492 P29266 P97519 P97532 Q5I0P2 Q64057 Q64565 Q64602	GO_BP
Cluster2	cellular aromatic compound metabolic process	20	58	4758	22870	1.66	0.0109	D3ZIQ1 D3ZLT1 G3V7J0 O55171 P04636 P07896 P08461 P10888 P11915 P12075 P18163 P19511 P21571 P63039 P97519 P97852 Q4FZT0 Q5XIH3 Q64602 Q6P2A5	GO_BP
Cluster2	cellular biogenic amine catabolic process	2	58	33	22870	23.9	0.00317	Q64057 Q64602	GO_BP
Cluster2	cellular biogenic amine metabolic process	2	58	84	22870	9.39	0.0193	Q64057 Q64602	GO_BP
Cluster2	cellular biosynthetic process	20	58	4426	22870	1.78	0.00479	A2VCW9 D4A2K1 G3V796 P07756 P07895 P08461 P11915 P12075 P18163 P19511 P21571 P28492 P85834 P97519 P97532 Q4FZT0 Q64565 Q6P2A5 Q9WVK3 Q9Z2M4	GO_BP
Cluster2	cellular calcium ion homeostasis	1	58	740	22870	0.53	0.852	Q4FZT0	GO_BP
Cluster2	cellular carbohydrate biosynthetic process	1	58	62	22870	6.36	0.146	G3V796	GO_BP
Cluster2	cellular carbohydrate metabolic process	1	58	211	22870	1.87	0.416	G3V796	GO_BP
Cluster2	cellular catabolic process	30	58	2344	22870	5.05	2.87e-15	A2VCW9 B3DMA2 D3ZHR2 D3ZIQ1 D4A2K1 G3V796 G3V7I0 G3V7J0 O55171 P07756 P07896 P13803 P14604 P15650 P18163 P28492 P29266 P97519 P97532 P97852 Q2M2R8 Q5I0P2 Q5XIC0 Q64057 Q64565 Q64602 Q9WVK3 Q9WVK7 Q9Z2M4 Q9Z311	GO_BP
Cluster2	cellular cation homeostasis	1	58	1037	22870	0.38	0.932	Q4FZT0	GO_BP
Cluster2	cellular chemical homeostasis	1	58	1275	22870	0.31	0.964	Q4FZT0	GO_BP
Cluster2	cellular component assembly	12	58	3682	22870	1.29	0.215	A2VCW9 D3ZLT1 G3V796 P07895 P15650 P97519 Q2M2R8 Q4FZT0 Q5XIH3 Q642G4 Q6P2A5 Q8VID1	GO_BP
Cluster2	cellular component biogenesis	12	58	3986	22870	1.19	0.305	A2VCW9 D3ZLT1 G3V796 P07895 P15650 P97519 Q2M2R8 Q4FZT0 Q5XIH3 Q642G4 Q6P2A5 Q8VID1	GO_BP
Cluster2	cellular component disassembly	1	58	537	22870	0.73	0.748	Q642G4	GO_BP
Cluster2	cellular component organization	27	58	8025	22870	1.33	0.0471	A2VCW9 D3ZHR2 D3ZIQ1 D3ZLT1 G3V796 G3V7I0 O55171 P07895 P07896 P11915 P15650 P19511 P21571 P27615 P63039 P97519 P97576 Q2M2R8 Q4FZT0 Q5U4F4 Q5XIC0 Q5XIH3 Q642G4 Q6P2A5 Q8VID1 Q9WVK3 Q9Z2M4	GO_BP
Cluster2	cellular component organization or biogenesis	27	58	8281	22870	1.29	0.0679	A2VCW9 D3ZHR2 D3ZIQ1 D3ZLT1 G3V796 G3V7I0 O55171 P07895 P07896 P11915 P15650 P19511 P21571 P27615 P63039 P97519 P97576 Q2M2R8 Q4FZT0 Q5U4F4 Q5XIC0 Q5XIH3 Q642G4 Q6P2A5 Q8VID1 Q9WVK3 Q9Z2M4	GO_BP
Cluster2	cellular detoxification	2	58	132	22870	5.97	0.0443	G3V7I0 P07895	GO_BP
Cluster2	cellular developmental process	8	58	5612	22870	0.56	0.985	G3V796 G3V7I0 G3V7J0 P07756 P07895 P27615 P97852 Q2M2R8	GO_BP
Cluster2	cellular divalent inorganic cation homeostasis	1	58	769	22870	0.51	0.863	Q4FZT0	GO_BP
Cluster2	cellular glucan metabolic process	1	58	71	22870	5.55	0.165	G3V796	GO_BP
Cluster2	cellular homeostasis	1	58	1447	22870	0.27	0.978	Q4FZT0	GO_BP
Cluster2	cellular hormone metabolic process	3	58	199	22870	5.94	0.0141	P11915 P97852 Q8VID1	GO_BP
Cluster2	cellular ion homeostasis	1	58	1063	22870	0.37	0.937	Q4FZT0	GO_BP
Cluster2	cellular ketone body metabolic process	1	58	20	22870	19.72	0.0495	P97519	GO_BP
Cluster2	cellular ketone metabolic process	3	58	143	22870	8.27	0.00575	P11915 Q64602 Q8VID1	GO_BP
Cluster2	cellular lipid catabolic process	16	58	319	22870	19.78	6.64e-17	B3DMA2 D3ZHR2 G3V796 O55171 P07756 P07896 P13803 P14604 P15650 P97852 Q2M2R8 Q5XIC0 Q9WVK3 Q9WVK7 Q9Z2M4 Q9Z311	GO_BP
Cluster2	cellular lipid metabolic process	20	58	1535	22870	5.14	4.78e-10	B3DMA2 D3ZHR2 D3ZIQ1 G3V796 O55171 P07756 P07896 P13803 P14604 P15650 P18163 P27615 P97852 Q2M2R8 Q5XIC0 Q8VID1 Q9WVK3 Q9WVK7 Q9Z2M4 Q9Z311	GO_BP
Cluster2	cellular localization	19	58	3451	22870	2.17	0.00059	D3ZHR2 D3ZIQ1 O55171 P07896 P11915 P12075 P19511 P21571 P27615 P63039 P97519 P97576 Q2M2R8 Q4FZT0 Q5XIC0 Q642G4 Q8VID1 Q9WVK3 Q9Z2M4	GO_BP
Cluster2	cellular macromolecular complex assembly	2	58	1178	22870	0.67	0.807	D3ZLT1 Q5XIH3	GO_BP
Cluster2	cellular macromolecule biosynthetic process	2	58	2709	22870	0.29	0.994	G3V796 P85834	GO_BP
Cluster2	cellular macromolecule localization	14	58	2067	22870	2.67	0.000521	D3ZIQ1 O55171 P07896 P11915 P27615 P63039 P97519 P97576 Q2M2R8 Q5XIC0 Q642G4 Q8VID1 Q9WVK3 Q9Z2M4	GO_BP
Cluster2	cellular macromolecule metabolic process	10	58	7297	22870	0.54	0.996	G3V796 G3V7I0 P04636 P07896 P63039 P85834 Q2M2R8 Q4FZT0 Q5I0P2 Q642G4	GO_BP
Cluster2	cellular metabolic process	53	58	11003	22870	1.9	2.57e-12	A2VCW9 B0BNJ4 B3DMA2 D3Z900 D3ZHR2 D3ZIQ1 D3ZLT1 D4A2K1 F1LN88 G3V6I4 G3V796 G3V7I0 G3V7J0 O55171 P04636 P07756 P07895 P07896 P08461 P10888 P11915 P12075 P13803 P14604 P15650 P18163 P19511 P21571 P27615 P28492 P29266 P63039 P85834 P97519 P97532 P97852 Q2M2R8 Q4FZT0 Q5I0P2 Q5XIC0 Q5XIH3 Q64057 Q642G4 Q64565 Q64602 Q6AYQ8 Q6P2A5 Q8VID1 Q9ER34 Q9WVK3 Q9WVK7 Q9Z2M4 Q9Z311	GO_BP
Cluster2	cellular metal ion homeostasis	1	58	918	22870	0.43	0.907	Q4FZT0	GO_BP
Cluster2	cellular modified amino acid biosynthetic process	1	58	60	22870	6.57	0.141	G3V796	GO_BP
Cluster2	cellular modified amino acid catabolic process	2	58	28	22870	28.17	0.00229	D4A2K1 P15650	GO_BP
Cluster2	cellular modified amino acid metabolic process	5	58	310	22870	6.36	0.00113	B0BNJ4 D4A2K1 G3V796 P07895 P15650	GO_BP
Cluster2	cellular nitrogen compound biosynthetic process	10	58	2869	22870	1.37	0.185	G3V796 P07756 P08461 P12075 P18163 P19511 P21571 P85834 Q4FZT0 Q6P2A5	GO_BP
Cluster2	cellular nitrogen compound catabolic process	4	58	653	22870	2.42	0.0836	G3V7J0 P15650 P97532 Q64602	GO_BP
Cluster2	cellular nitrogen compound metabolic process	28	58	5421	22870	2.04	3.85e-05	B0BNJ4 D3ZIQ1 D3ZLT1 G3V796 G3V7J0 O55171 P04636 P07756 P07895 P07896 P08461 P10888 P11915 P12075 P15650 P18163 P19511 P21571 P63039 P85834 P97519 P97532 P97852 Q4FZT0 Q5XIH3 Q64057 Q64602 Q6P2A5	GO_BP
Cluster2	cellular oxidant detoxification	2	58	123	22870	6.41	0.039	G3V7I0 P07895	GO_BP
Cluster2	cellular polysaccharide biosynthetic process	1	58	48	22870	8.21	0.115	G3V796	GO_BP
Cluster2	cellular polysaccharide metabolic process	1	58	90	22870	4.38	0.205	G3V796	GO_BP
Cluster2	cellular process	58	58	19704	22870	1.16	0.000174	A2VCW9 B0BNJ4 B3DMA2 D3Z900 D3ZHR2 D3ZIQ1 D3ZLT1 D4A2K1 F1LN88 F1M7X5 G3V6I4 G3V796 G3V7I0 G3V7J0 O55171 P04636 P07756 P07895 P07896 P08461 P10888 P11915 P12075 P13803 P14604 P15650 P18163 P19511 P21571 P26772 P27615 P28492 P29266 P63039 P85834 P97519 P97532 P97576 P97852 Q2M2R8 Q4FZT0 Q5I0P2 Q5U4F4 Q5XIC0 Q5XIH3 Q64057 Q642G4 Q64565 Q64602 Q6AY30 Q6AYQ8 Q6P2A5 Q8VID1 Q9ER34 Q9WVK3 Q9WVK7 Q9Z2M4 …	GO_BP
Cluster2	cellular protein complex disassembly	1	58	193	22870	2.04	0.389	Q642G4	GO_BP
Cluster2	cellular protein localization	14	58	2052	22870	2.69	0.000484	D3ZIQ1 O55171 P07896 P11915 P27615 P63039 P97519 P97576 Q2M2R8 Q5XIC0 Q642G4 Q8VID1 Q9WVK3 Q9Z2M4	GO_BP
Cluster2	cellular protein metabolic process	8	58	5114	22870	0.62	0.964	G3V7I0 P04636 P07896 P85834 Q2M2R8 Q4FZT0 Q5I0P2 Q642G4	GO_BP
Cluster2	cellular protein modification process	6	58	4163	22870	0.57	0.966	G3V7I0 P04636 P07896 Q2M2R8 Q5I0P2 Q642G4	GO_BP
Cluster2	cellular respiration	8	58	231	22870	13.66	1.19e-07	D3ZLT1 P04636 P07895 P10888 P12075 Q5XIH3 Q6AYQ8 Q9ER34	GO_BP
Cluster2	cellular response to DNA damage stimulus	1	58	940	22870	0.42	0.913	P07895	GO_BP
Cluster2	cellular response to acid chemical	2	58	427	22870	1.85	0.295	F1LN88 P07756	GO_BP
Cluster2	cellular response to alcohol	2	58	202	22870	3.9	0.0931	P07895 P11915	GO_BP
Cluster2	cellular response to ammonia	1	58	1	22870	394.31	0.00254	P07756	GO_BP
Cluster2	cellular response to antibiotic	1	58	310	22870	1.27	0.547	P07895	GO_BP
Cluster2	cellular response to cAMP	1	58	150	22870	2.63	0.318	P07756	GO_BP
Cluster2	cellular response to chemical stimulus	7	58	4748	22870	0.58	0.971	F1LN88 G3V7I0 P07756 P07895 P11915 P18163 P97852	GO_BP
Cluster2	cellular response to cholesterol	1	58	23	22870	17.14	0.0568	P11915	GO_BP
Cluster2	cellular response to cytokine stimulus	2	58	1638	22870	0.48	0.927	P07895 P18163	GO_BP
Cluster2	cellular response to drug	1	58	713	22870	0.55	0.841	P07895	GO_BP
Cluster2	cellular response to endogenous stimulus	3	58	2194	22870	0.54	0.926	F1LN88 P07756 P18163	GO_BP
Cluster2	cellular response to ethanol	1	58	47	22870	8.39	0.113	P07895	GO_BP
Cluster2	cellular response to fatty acid	2	58	111	22870	7.1	0.0323	F1LN88 P07756	GO_BP
Cluster2	cellular response to glucagon stimulus	1	58	38	22870	10.38	0.0921	P07756	GO_BP
Cluster2	cellular response to growth factor stimulus	1	58	878	22870	0.45	0.897	P07756	GO_BP
Cluster2	cellular response to heat	1	58	89	22870	4.43	0.203	P63039	GO_BP
Cluster2	cellular response to hormone stimulus	3	58	1274	22870	0.93	0.634	F1LN88 P07756 P18163	GO_BP
Cluster2	cellular response to interleukin-12	1	58	55	22870	7.17	0.13	P07895	GO_BP
Cluster2	cellular response to lipid	3	58	1005	22870	1.18	0.472	F1LN88 P07756 P11915	GO_BP
Cluster2	cellular response to nitrogen compound	1	58	1312	22870	0.3	0.968	P07756	GO_BP
Cluster2	cellular response to oleic acid	1	58	4	22870	98.58	0.0101	P07756	GO_BP
Cluster2	cellular response to organic cyclic compound	3	58	1038	22870	1.14	0.494	P07756 P11915 P97852	GO_BP
Cluster2	cellular response to organic substance	6	58	3910	22870	0.61	0.947	F1LN88 P07756 P07895 P11915 P18163 P97852	GO_BP
Cluster2	cellular response to organonitrogen compound	1	58	1176	22870	0.34	0.953	P07756	GO_BP
Cluster2	cellular response to oxidative stress	2	58	469	22870	1.68	0.334	G3V7I0 P07895	GO_BP
Cluster2	cellular response to oxygen radical	1	58	22	22870	17.92	0.0544	P07895	GO_BP
Cluster2	cellular response to oxygen-containing compound	5	58	1953	22870	1.01	0.559	F1LN88 G3V7I0 P07756 P07895 P11915	GO_BP
Cluster2	cellular response to peptide	1	58	724	22870	0.54	0.846	P07756	GO_BP
Cluster2	cellular response to peptide hormone stimulus	1	58	628	22870	0.63	0.802	P07756	GO_BP
Cluster2	cellular response to reactive oxygen species	2	58	277	22870	2.85	0.156	G3V7I0 P07895	GO_BP
Cluster2	cellular response to sterol	1	58	29	22870	13.6	0.071	P11915	GO_BP
Cluster2	cellular response to stimulus	10	58	9488	22870	0.42	1	F1LN88 G3V7I0 P07756 P07895 P11915 P18163 P27615 P63039 P97852 Q4FZT0	GO_BP
Cluster2	cellular response to stress	4	58	2536	22870	0.62	0.898	G3V7I0 P07895 P63039 Q4FZT0	GO_BP
Cluster2	cellular response to superoxide	1	58	22	22870	17.92	0.0544	P07895	GO_BP
Cluster2	cellular response to toxic substance	3	58	383	22870	3.09	0.0733	G3V7I0 P07756 P07895	GO_BP
Cluster2	cellular response to xenobiotic stimulus	1	58	408	22870	0.97	0.648	P18163	GO_BP
Cluster2	central nervous system development	3	58	1755	22870	0.67	0.832	P97532 Q2M2R8 Q6P2A5	GO_BP
Cluster2	central nervous system neuron differentiation	1	58	339	22870	1.16	0.58	Q2M2R8	GO_BP
Cluster2	cerebellum development	1	58	195	22870	2.02	0.392	Q6P2A5	GO_BP
Cluster2	cerebral cortex cell migration	1	58	89	22870	4.43	0.203	Q2M2R8	GO_BP
Cluster2	cerebral cortex development	1	58	227	22870	1.74	0.44	Q2M2R8	GO_BP
Cluster2	cerebral cortex neuron differentiation	1	58	41	22870	9.62	0.099	Q2M2R8	GO_BP
Cluster2	chaperone-mediated protein folding	2	58	91	22870	8.67	0.0224	P26772 P63039	GO_BP
Cluster2	chemical homeostasis	3	58	1895	22870	0.62	0.87	P07756 P07895 Q4FZT0	GO_BP
Cluster2	cholesterol metabolic process	1	58	166	22870	2.38	0.345	P97852	GO_BP
Cluster2	cholesterol transport	1	58	108	22870	3.65	0.24	P11915	GO_BP
Cluster2	choline catabolic process	1	58	9	22870	43.81	0.0226	Q64057	GO_BP
Cluster2	choline metabolic process	1	58	17	22870	23.19	0.0423	Q64057	GO_BP
Cluster2	circulatory system development	2	58	1428	22870	0.55	0.885	G3V796 P07895	GO_BP
Cluster2	circulatory system process	2	58	775	22870	1.02	0.589	P07756 P07895	GO_BP
Cluster2	citrate metabolic process	3	58	55	22870	21.51	0.00037	P04636 Q6AYQ8 Q9ER34	GO_BP
Cluster2	citrulline biosynthetic process	1	58	4	22870	98.58	0.0101	P07756	GO_BP
Cluster2	citrulline metabolic process	1	58	9	22870	43.81	0.0226	P07756	GO_BP
Cluster2	coagulation	1	58	408	22870	0.97	0.648	Q6P2A5	GO_BP
Cluster2	coenzyme biosynthetic process	2	58	277	22870	2.85	0.156	P08461 P18163	GO_BP
Cluster2	coenzyme metabolic process	9	58	550	22870	6.45	9.4e-06	D3ZIQ1 O55171 P04636 P07896 P08461 P11915 P18163 P97519 P97852	GO_BP
Cluster2	cofactor biosynthetic process	3	58	358	22870	3.3	0.0625	P07895 P08461 P18163	GO_BP
Cluster2	cofactor catabolic process	1	58	86	22870	4.59	0.197	G3V7I0	GO_BP
Cluster2	cofactor metabolic process	13	58	832	22870	6.16	1.23e-07	B0BNJ4 D3ZIQ1 G3V7I0 O55171 P04636 P07895 P07896 P08461 P11915 P18163 P97519 P97852 Q64602	GO_BP
Cluster2	cristae formation	2	58	32	22870	24.64	0.00299	P19511 P21571	GO_BP
Cluster2	cyanate catabolic process	1	58	2	22870	197.16	0.00507	P97532	GO_BP
Cluster2	cyanate metabolic process	1	58	2	22870	197.16	0.00507	P97532	GO_BP
Cluster2	cysteine metabolic process	1	58	25	22870	15.77	0.0615	P97532	GO_BP
Cluster2	cytokine production	2	58	243	22870	3.25	0.126	P63039 Q4FZT0	GO_BP
Cluster2	cytokine production involved in immune response	1	58	42	22870	9.39	0.101	P63039	GO_BP
Cluster2	cytokine-mediated signaling pathway	2	58	900	22870	0.88	0.671	P07895 P18163	GO_BP
Cluster2	cytoskeleton organization	1	58	1605	22870	0.25	0.985	Q642G4	GO_BP
Cluster2	cytoskeleton-dependent intracellular transport	1	58	260	22870	1.52	0.485	Q642G4	GO_BP
Cluster2	dATP metabolic process	1	58	14	22870	28.17	0.0349	Q6P2A5	GO_BP
Cluster2	defense response	2	58	1753	22870	0.45	0.943	F1M7X5 P27615	GO_BP
Cluster2	deoxyribonucleoside triphosphate metabolic process	1	58	29	22870	13.6	0.071	Q6P2A5	GO_BP
Cluster2	deoxyribonucleotide metabolic process	1	58	55	22870	7.17	0.13	Q6P2A5	GO_BP
Cluster2	deoxyribose phosphate metabolic process	1	58	48	22870	8.21	0.115	Q6P2A5	GO_BP
Cluster2	detection of chemical stimulus	1	58	666	22870	0.59	0.82	P07895	GO_BP
Cluster2	detection of oxygen	1	58	11	22870	35.85	0.0276	P07895	GO_BP
Cluster2	detection of stimulus	1	58	933	22870	0.42	0.911	P07895	GO_BP
Cluster2	determination of adult lifespan	1	58	36	22870	10.95	0.0874	Q5U4F4	GO_BP
Cluster2	detoxification	4	58	146	22870	10.8	0.000517	D3Z900 G3V6I4 G3V7I0 P07895	GO_BP
Cluster2	detoxification of nitrogen compound	2	58	14	22870	56.33	0.000564	D3Z900 G3V6I4	GO_BP
Cluster2	development of primary male sexual characteristics	1	58	300	22870	1.31	0.536	P97852	GO_BP
Cluster2	development of primary sexual characteristics	1	58	478	22870	0.82	0.707	P97852	GO_BP
Cluster2	developmental pigmentation	1	58	74	22870	5.33	0.172	P07895	GO_BP
Cluster2	developmental process	16	58	8750	22870	0.72	0.967	F1LN88 G3V796 G3V7I0 G3V7J0 P07756 P07895 P11915 P27615 P63039 P97519 P97532 P97852 Q2M2R8 Q5U4F4 Q6P2A5 Q9ER34	GO_BP
Cluster2	developmental process involved in reproduction	2	58	1212	22870	0.65	0.82	G3V7I0 P97852	GO_BP
Cluster2	dicarboxylic acid biosynthetic process	1	58	24	22870	16.43	0.0592	P28492	GO_BP
Cluster2	dicarboxylic acid catabolic process	1	58	19	22870	20.75	0.0471	D3ZIQ1	GO_BP
Cluster2	dicarboxylic acid metabolic process	5	58	161	22870	12.25	5.51e-05	D3ZIQ1 D4A2K1 P04636 P28492 Q64602	GO_BP
Cluster2	dicarboxylic acid transport	1	58	110	22870	3.58	0.244	P28492	GO_BP
Cluster2	digestive system development	1	58	273	22870	1.44	0.502	P07756	GO_BP
Cluster2	digestive tract development	1	58	249	22870	1.58	0.47	P07756	GO_BP
Cluster2	diterpenoid metabolic process	2	58	144	22870	5.48	0.0518	Q8VID1 Q9WVK3	GO_BP
Cluster2	divalent inorganic cation homeostasis	1	58	832	22870	0.47	0.884	Q4FZT0	GO_BP
Cluster2	divalent inorganic cation transport	1	58	505	22870	0.78	0.727	Q4FZT0	GO_BP
Cluster2	divalent metal ion transport	1	58	504	22870	0.78	0.726	Q4FZT0	GO_BP
Cluster2	drug catabolic process	3	58	215	22870	5.5	0.0173	A2VCW9 G3V7I0 Q5I0P2	GO_BP
Cluster2	drug metabolic process	25	58	1114	22870	8.85	4.45e-18	A2VCW9 B0BNJ4 D3ZHR2 D3ZLT1 F1LN88 G3V7I0 P04636 P07756 P07895 P10888 P11915 P12075 P18163 P19511 P21571 P97519 P97532 Q4FZT0 Q5I0P2 Q5XIH3 Q64565 Q6AYQ8 Q6P2A5 Q9ER34 Q9WVK3	GO_BP
Cluster2	electron transport chain	7	58	232	22870	11.9	1.96e-06	D3ZLT1 F1LN88 P07895 P10888 P12075 P13803 Q5XIH3	GO_BP
Cluster2	endocytosis	1	58	746	22870	0.53	0.854	P27615	GO_BP
Cluster2	endomembrane system organization	1	58	526	22870	0.75	0.741	Q2M2R8	GO_BP
Cluster2	endoplasmic reticulum organization	1	58	74	22870	5.33	0.172	Q2M2R8	GO_BP
Cluster2	endothelial cell migration	1	58	115	22870	3.43	0.254	F1M7X5	GO_BP
Cluster2	energy reserve metabolic process	1	58	108	22870	3.65	0.24	G3V796	GO_BP
Cluster2	entry into host	1	58	101	22870	3.9	0.227	F1M7X5	GO_BP
Cluster2	entry into host cell	1	58	101	22870	3.9	0.227	F1M7X5	GO_BP
Cluster2	epithelial cell development	1	58	345	22870	1.14	0.586	P97852	GO_BP
Cluster2	epithelial cell differentiation	2	58	964	22870	0.82	0.708	P07756 P97852	GO_BP
Cluster2	epithelial cell migration	1	58	147	22870	2.68	0.312	F1M7X5	GO_BP
Cluster2	epithelium development	2	58	1763	22870	0.45	0.944	P07756 P97852	GO_BP
Cluster2	epithelium migration	1	58	151	22870	2.61	0.319	F1M7X5	GO_BP
Cluster2	erythrophore differentiation	1	58	1	22870	394.31	0.00254	P07895	GO_BP
Cluster2	establishment of localization	24	58	6266	22870	1.51	0.0148	D3ZHR2 D3ZIQ1 F1M7X5 O55171 P07896 P10888 P11915 P12075 P18163 P19511 P21571 P27615 P28492 P63039 P97519 P97576 Q2M2R8 Q4FZT0 Q5XIC0 Q642G4 Q6AY30 Q8VID1 Q9WVK3 Q9Z2M4	GO_BP
Cluster2	establishment of localization in cell	18	58	2507	22870	2.83	2.94e-05	D3ZHR2 D3ZIQ1 O55171 P07896 P12075 P19511 P21571 P27615 P63039 P97519 P97576 Q2M2R8 Q4FZT0 Q5XIC0 Q642G4 Q8VID1 Q9WVK3 Q9Z2M4	GO_BP
Cluster2	establishment of organelle localization	1	58	649	22870	0.61	0.812	Q642G4	GO_BP
Cluster2	establishment of protein localization	13	58	1676	22870	3.06	0.000235	D3ZIQ1 O55171 P07896 P27615 P63039 P97519 P97576 Q2M2R8 Q5XIC0 Q642G4 Q8VID1 Q9WVK3 Q9Z2M4	GO_BP
Cluster2	establishment of protein localization to membrane	1	58	317	22870	1.24	0.555	Q2M2R8	GO_BP
Cluster2	establishment of protein localization to organelle	13	58	558	22870	9.19	1.09e-09	D3ZIQ1 O55171 P07896 P27615 P63039 P97519 P97576 Q2M2R8 Q5XIC0 Q642G4 Q8VID1 Q9WVK3 Q9Z2M4	GO_BP
Cluster2	establishment of protein localization to vacuole	1	58	58	22870	6.8	0.137	P27615	GO_BP
Cluster2	estrogen metabolic process	1	58	44	22870	8.96	0.106	P97852	GO_BP
Cluster2	ethanol metabolic process	1	58	29	22870	13.6	0.071	F1LN88	GO_BP
Cluster2	ethanol oxidation	1	58	14	22870	28.17	0.0349	F1LN88	GO_BP
Cluster2	exocytosis	1	58	1144	22870	0.34	0.949	Q6AY30	GO_BP
Cluster2	exploration behavior	1	58	61	22870	6.46	0.144	F1M7X5	GO_BP
Cluster2	fat cell differentiation	1	58	193	22870	2.04	0.389	G3V7J0	GO_BP
Cluster2	fatty acid alpha-oxidation	1	58	15	22870	26.29	0.0374	Q9WVK3	GO_BP
Cluster2	fatty acid beta-oxidation	13	58	99	22870	51.78	2.23e-19	B3DMA2 D3ZHR2 G3V796 P07896 P13803 P14604 P15650 P97852 Q2M2R8 Q5XIC0 Q9WVK7 Q9Z2M4 Q9Z311	GO_BP
Cluster2	fatty acid beta-oxidation using acyl-CoA oxidase	4	58	28	22870	56.33	7.28e-07	D3ZHR2 P07896 Q5XIC0 Q9Z2M4	GO_BP
Cluster2	fatty acid biosynthetic process	2	58	195	22870	4.04	0.0877	Q9WVK3 Q9Z2M4	GO_BP
Cluster2	fatty acid catabolic process	15	58	172	22870	34.39	1.68e-19	B3DMA2 D3ZHR2 G3V796 O55171 P07896 P13803 P14604 P15650 P97852 Q2M2R8 Q5XIC0 Q9WVK3 Q9WVK7 Q9Z2M4 Q9Z311	GO_BP
Cluster2	fatty acid derivative biosynthetic process	2	58	154	22870	5.12	0.0583	P18163 P97519	GO_BP
Cluster2	fatty acid derivative metabolic process	3	58	339	22870	3.49	0.0548	P18163 P97519 P97852	GO_BP
Cluster2	fatty acid elongation	1	58	20	22870	19.72	0.0495	Q9WVK3	GO_BP
Cluster2	fatty acid metabolic process	18	58	589	22870	12.05	3.32e-15	B3DMA2 D3ZHR2 D3ZIQ1 G3V796 O55171 P07896 P13803 P14604 P15650 P18163 P27615 P97852 Q2M2R8 Q5XIC0 Q9WVK3 Q9WVK7 Q9Z2M4 Q9Z311	GO_BP
Cluster2	fatty acid oxidation	14	58	144	22870	38.34	6.46e-19	B3DMA2 D3ZHR2 G3V796 P07896 P13803 P14604 P15650 P97852 Q2M2R8 Q5XIC0 Q9WVK3 Q9WVK7 Q9Z2M4 Q9Z311	GO_BP
Cluster2	fatty acid transport	2	58	124	22870	6.36	0.0396	D3ZHR2 P18163	GO_BP
Cluster2	fatty alcohol metabolic process	1	58	7	22870	56.33	0.0176	Q9WVK3	GO_BP
Cluster2	fatty-acyl-CoA biosynthetic process	1	58	45	22870	8.76	0.108	P18163	GO_BP
Cluster2	fatty-acyl-CoA metabolic process	2	58	61	22870	12.93	0.0105	P18163 P97852	GO_BP
Cluster2	fear response	1	58	86	22870	4.59	0.197	F1M7X5	GO_BP
Cluster2	female pregnancy	1	58	520	22870	0.76	0.737	G3V7I0	GO_BP
Cluster2	forebrain cell migration	1	58	117	22870	3.37	0.258	Q2M2R8	GO_BP
Cluster2	forebrain development	2	58	767	22870	1.03	0.584	Q2M2R8 Q6P2A5	GO_BP
Cluster2	gas homeostasis	1	58	16	22870	24.64	0.0398	P07895	GO_BP
Cluster2	gene expression	3	58	3077	22870	0.38	0.989	P85834 Q4FZT0 Q5I0P2	GO_BP
Cluster2	generation of neurons	3	58	2750	22870	0.43	0.977	P07895 P27615 Q2M2R8	GO_BP
Cluster2	generation of precursor metabolites and energy	16	58	613	22870	10.29	1.65e-12	A2VCW9 D3ZLT1 F1LN88 G3V796 P04636 P07895 P10888 P12075 P13803 P19511 P21571 P97519 Q4FZT0 Q5XIH3 Q6AYQ8 Q9ER34	GO_BP
Cluster2	gland development	8	58	930	22870	3.39	0.00229	F1LN88 G3V796 P07756 P07895 P97519 P97532 Q6P2A5 Q9ER34	GO_BP
Cluster2	glucan biosynthetic process	1	58	31	22870	12.72	0.0757	G3V796	GO_BP
Cluster2	glucan metabolic process	1	58	71	22870	5.55	0.165	G3V796	GO_BP
Cluster2	gluconeogenesis	1	58	90	22870	4.38	0.205	P04636	GO_BP
Cluster2	glucose metabolic process	1	58	202	22870	1.95	0.403	P04636	GO_BP
Cluster2	glutamate biosynthetic process	1	58	11	22870	35.85	0.0276	P28492	GO_BP
Cluster2	glutamate metabolic process	2	58	39	22870	20.22	0.00441	P28492 Q64602	GO_BP
Cluster2	glutamate secretion	1	58	37	22870	10.66	0.0897	P28492	GO_BP
Cluster2	glutamine catabolic process	1	58	6	22870	65.72	0.0151	P28492	GO_BP
Cluster2	glutamine family amino acid biosynthetic process	2	58	23	22870	34.29	0.00155	P07756 P28492	GO_BP
Cluster2	glutamine family amino acid catabolic process	1	58	45	22870	8.76	0.108	P28492	GO_BP
Cluster2	glutamine family amino acid metabolic process	3	58	83	22870	14.25	0.00123	P07756 P28492 Q64602	GO_BP
Cluster2	glutamine metabolic process	1	58	22	22870	17.92	0.0544	P28492	GO_BP
Cluster2	glutathione metabolic process	2	58	102	22870	7.73	0.0277	B0BNJ4 P07895	GO_BP
Cluster2	glycerolipid biosynthetic process	1	58	347	22870	1.14	0.588	P18163	GO_BP
Cluster2	glycerolipid catabolic process	1	58	97	22870	4.07	0.219	P07756	GO_BP
Cluster2	glycerolipid metabolic process	2	58	650	22870	1.21	0.494	P07756 P18163	GO_BP
Cluster2	glycine biosynthetic process	1	58	7	22870	56.33	0.0176	Q64565	GO_BP
Cluster2	glycine catabolic process	1	58	6	22870	65.72	0.0151	Q5I0P2	GO_BP
Cluster2	glycine metabolic process	2	58	24	22870	32.86	0.00168	Q5I0P2 Q64565	GO_BP
Cluster2	glycogen biosynthetic process	1	58	31	22870	12.72	0.0757	G3V796	GO_BP
Cluster2	glycogen metabolic process	1	58	71	22870	5.55	0.165	G3V796	GO_BP
Cluster2	glycosyl compound metabolic process	1	58	234	22870	1.69	0.45	Q6P2A5	GO_BP
Cluster2	glyoxylate catabolic process	2	58	4	22870	197.16	3.78e-05	D4A2K1 Q64565	GO_BP
Cluster2	glyoxylate metabolic process	2	58	11	22870	71.69	0.000343	D4A2K1 Q64565	GO_BP
Cluster2	gonad development	1	58	471	22870	0.84	0.701	P97852	GO_BP
Cluster2	guanosine-containing compound metabolic process	1	58	84	22870	4.69	0.192	Q6P2A5	GO_BP
Cluster2	head development	2	58	1437	22870	0.55	0.887	Q2M2R8 Q6P2A5	GO_BP
Cluster2	heart development	2	58	952	22870	0.83	0.702	G3V796 P07895	GO_BP
Cluster2	hematopoietic or lymphoid organ development	2	58	1071	22870	0.74	0.762	G3V7I0 P07895	GO_BP
Cluster2	hemopoiesis	2	58	991	22870	0.8	0.723	G3V7I0 P07895	GO_BP
Cluster2	hemostasis	1	58	416	22870	0.95	0.656	Q6P2A5	GO_BP
Cluster2	hepaticobiliary system development	8	58	346	22870	9.12	2.51e-06	F1LN88 G3V796 P07756 P07895 P97519 P97532 Q6P2A5 Q9ER34	GO_BP
Cluster2	hepatocyte differentiation	1	58	15	22870	26.29	0.0374	P07756	GO_BP
Cluster2	heterocycle biosynthetic process	7	58	2125	22870	1.3	0.292	P08461 P12075 P18163 P19511 P21571 Q4FZT0 Q6P2A5	GO_BP
Cluster2	heterocycle catabolic process	2	58	656	22870	1.2	0.499	G3V7J0 Q64602	GO_BP
Cluster2	heterocycle metabolic process	20	58	4678	22870	1.69	0.00903	D3ZIQ1 D3ZLT1 G3V7J0 O55171 P04636 P07896 P08461 P10888 P11915 P12075 P18163 P19511 P21571 P63039 P97519 P97852 Q4FZT0 Q5XIH3 Q64602 Q6P2A5	GO_BP
Cluster2	hexose biosynthetic process	1	58	96	22870	4.11	0.217	P04636	GO_BP
Cluster2	hexose metabolic process	1	58	252	22870	1.56	0.475	P04636	GO_BP
Cluster2	hindbrain development	1	58	282	22870	1.4	0.514	Q6P2A5	GO_BP
Cluster2	homeostatic process	4	58	2703	22870	0.58	0.924	P07756 P07895 P15650 Q4FZT0	GO_BP
Cluster2	homocysteine metabolic process	2	58	21	22870	37.55	0.00129	P07756 P97532	GO_BP
Cluster2	homoserine metabolic process	1	58	9	22870	43.81	0.0226	P97532	GO_BP
Cluster2	hormone biosynthetic process	1	58	115	22870	3.43	0.254	P11915	GO_BP
Cluster2	hormone metabolic process	3	58	342	22870	3.46	0.056	P11915 P97852 Q8VID1	GO_BP
Cluster2	hormone-mediated signaling pathway	1	58	245	22870	1.61	0.465	P18163	GO_BP
Cluster2	hydrogen ion transmembrane transport	5	58	182	22870	10.83	9.84e-05	P10888 P12075 P19511 P21571 Q4FZT0	GO_BP
Cluster2	hydrogen peroxide biosynthetic process	1	58	11	22870	35.85	0.0276	P07895	GO_BP
Cluster2	hydrogen peroxide catabolic process	1	58	30	22870	13.14	0.0734	G3V7I0	GO_BP
Cluster2	hydrogen peroxide metabolic process	2	58	48	22870	16.43	0.00662	G3V7I0 P07895	GO_BP
Cluster2	hydrogen sulfide biosynthetic process	1	58	6	22870	65.72	0.0151	P97532	GO_BP
Cluster2	hydrogen sulfide metabolic process	2	58	9	22870	87.62	0.000225	B0BNJ4 P97532	GO_BP
Cluster2	immune effector process	1	58	1320	22870	0.3	0.968	P63039	GO_BP
Cluster2	immune response	1	58	2036	22870	0.19	0.996	P63039	GO_BP
Cluster2	immune response-activating signal transduction	2	58	515	22870	1.53	0.377	P63039 Q4FZT0	GO_BP
Cluster2	immune response-regulating signaling pathway	2	58	566	22870	1.39	0.422	P63039 Q4FZT0	GO_BP
Cluster2	immune system development	3	58	1127	22870	1.05	0.55	G3V7I0 P07895 P63039	GO_BP
Cluster2	immune system process	5	58	3481	22870	0.57	0.953	F1M7X5 G3V7I0 P07895 P63039 Q4FZT0	GO_BP
Cluster2	immunoglobulin mediated immune response	1	58	123	22870	3.21	0.269	P63039	GO_BP
Cluster2	immunoglobulin production	1	58	87	22870	4.53	0.199	P63039	GO_BP
Cluster2	import into cell	1	58	859	22870	0.46	0.892	P27615	GO_BP
Cluster2	indolalkylamine catabolic process	1	58	16	22870	24.64	0.0398	Q64602	GO_BP
Cluster2	indolalkylamine metabolic process	1	58	26	22870	15.17	0.0639	Q64602	GO_BP
Cluster2	indole-containing compound catabolic process	1	58	16	22870	24.64	0.0398	Q64602	GO_BP
Cluster2	indole-containing compound metabolic process	1	58	43	22870	9.17	0.104	Q64602	GO_BP
Cluster2	inflammatory response	1	58	710	22870	0.56	0.84	P27615	GO_BP
Cluster2	inner mitochondrial membrane organization	2	58	47	22870	16.78	0.00635	P19511 P21571	GO_BP
Cluster2	inorganic cation transmembrane transport	5	58	1003	22870	1.97	0.11	P10888 P12075 P19511 P21571 Q4FZT0	GO_BP
Cluster2	inorganic ion homeostasis	2	58	1203	22870	0.66	0.817	P07895 Q4FZT0	GO_BP
Cluster2	inorganic ion transmembrane transport	5	58	1129	22870	1.75	0.157	P10888 P12075 P19511 P21571 Q4FZT0	GO_BP
Cluster2	inositol phosphate biosynthetic process	1	58	22	22870	17.92	0.0544	P11915	GO_BP
Cluster2	inositol phosphate metabolic process	1	58	100	22870	3.94	0.225	P11915	GO_BP
Cluster2	inositol trisphosphate biosynthetic process	1	58	8	22870	49.29	0.0201	P11915	GO_BP
Cluster2	inositol trisphosphate metabolic process	1	58	17	22870	23.19	0.0423	P11915	GO_BP
Cluster2	interaction with host	1	58	232	22870	1.7	0.447	F1M7X5	GO_BP
Cluster2	interaction with symbiont	1	58	164	22870	2.4	0.342	P63039	GO_BP
Cluster2	interleukin-12-mediated signaling pathway	1	58	55	22870	7.17	0.13	P07895	GO_BP
Cluster2	interleukin-2 production	1	58	18	22870	21.91	0.0447	Q4FZT0	GO_BP
Cluster2	internal protein amino acid acetylation	2	58	175	22870	4.51	0.0729	P04636 P07896	GO_BP
Cluster2	interspecies interaction between organisms	2	58	644	22870	1.22	0.489	F1M7X5 P63039	GO_BP
Cluster2	intracellular protein transmembrane transport	4	58	68	22870	23.19	2.69e-05	P63039 P97576 Q2M2R8 Q642G4	GO_BP
Cluster2	intracellular protein transport	13	58	1105	22870	4.64	3.02e-06	D3ZIQ1 O55171 P07896 P27615 P63039 P97519 P97576 Q2M2R8 Q5XIC0 Q642G4 Q8VID1 Q9WVK3 Q9Z2M4	GO_BP
Cluster2	intracellular signal transduction	1	58	2366	22870	0.17	0.998	P07895	GO_BP
Cluster2	intracellular transport	18	58	2105	22870	3.37	2.58e-06	D3ZHR2 D3ZIQ1 O55171 P07896 P12075 P19511 P21571 P27615 P63039 P97519 P97576 Q2M2R8 Q4FZT0 Q5XIC0 Q642G4 Q8VID1 Q9WVK3 Q9Z2M4	GO_BP
Cluster2	intrinsic apoptotic signaling pathway	1	58	274	22870	1.44	0.503	P07895	GO_BP
Cluster2	ion homeostasis	3	58	1302	22870	0.91	0.649	P07756 P07895 Q4FZT0	GO_BP
Cluster2	ion transmembrane transport	5	58	1582	22870	1.25	0.374	P10888 P12075 P19511 P21571 Q4FZT0	GO_BP
Cluster2	ion transport	9	58	2084	22870	1.7	0.0781	D3ZHR2 P10888 P11915 P12075 P18163 P19511 P21571 P28492 Q4FZT0	GO_BP
Cluster2	iron ion homeostasis	1	58	142	22870	2.78	0.304	P07895	GO_BP
Cluster2	isocitrate metabolic process	1	58	9	22870	43.81	0.0226	Q9ER34	GO_BP
Cluster2	isoprenoid metabolic process	2	58	215	22870	3.67	0.103	Q8VID1 Q9WVK3	GO_BP
Cluster2	isotype switching	1	58	29	22870	13.6	0.071	P63039	GO_BP
Cluster2	isotype switching to IgG isotypes	1	58	2	22870	197.16	0.00507	P63039	GO_BP
Cluster2	ketone biosynthetic process	1	58	48	22870	8.21	0.115	P11915	GO_BP
Cluster2	ketone body biosynthetic process	1	58	13	22870	30.33	0.0325	P97519	GO_BP
Cluster2	ketone body metabolic process	1	58	22	22870	17.92	0.0544	P97519	GO_BP
Cluster2	kidney development	1	58	495	22870	0.8	0.719	P97532	GO_BP
Cluster2	kynurenine metabolic process	1	58	14	22870	28.17	0.0349	Q64602	GO_BP
Cluster2	leucine catabolic process	1	58	4	22870	98.58	0.0101	P97519	GO_BP
Cluster2	leucine metabolic process	1	58	10	22870	39.43	0.0251	P97519	GO_BP
Cluster2	leukocyte activation	3	58	1426	22870	0.83	0.71	F1M7X5 P63039 Q4FZT0	GO_BP
Cluster2	leukocyte activation involved in immune response	1	58	895	22870	0.44	0.902	P63039	GO_BP
Cluster2	leukocyte mediated immunity	1	58	954	22870	0.41	0.916	P63039	GO_BP
Cluster2	leukocyte proliferation	1	58	152	22870	2.59	0.321	P63039	GO_BP
Cluster2	linoleic acid metabolic process	2	58	49	22870	16.09	0.00689	D3ZHR2 P18163	GO_BP
Cluster2	lipid biosynthetic process	4	58	897	22870	1.76	0.192	P11915 P18163 Q9WVK3 Q9Z2M4	GO_BP
Cluster2	lipid catabolic process	16	58	401	22870	15.73	2.42e-15	B3DMA2 D3ZHR2 G3V796 O55171 P07756 P07896 P13803 P14604 P15650 P97852 Q2M2R8 Q5XIC0 Q9WVK3 Q9WVK7 Q9Z2M4 Q9Z311	GO_BP
Cluster2	lipid hydroperoxide transport	1	58	3	22870	131.44	0.00759	P11915	GO_BP
Cluster2	lipid localization	4	58	463	22870	3.41	0.0298	D3ZHR2 P11915 P18163 Q4FZT0	GO_BP
Cluster2	lipid metabolic process	22	58	1854	22870	4.68	2.82e-10	B3DMA2 D3ZHR2 D3ZIQ1 G3V796 O55171 P07756 P07896 P11915 P13803 P14604 P15650 P18163 P27615 P97519 P97852 Q2M2R8 Q5XIC0 Q8VID1 Q9WVK3 Q9WVK7 Q9Z2M4 Q9Z311	GO_BP
Cluster2	lipid modification	14	58	430	22870	12.84	2.67e-12	B3DMA2 D3ZHR2 G3V796 P07896 P13803 P14604 P15650 P97852 Q2M2R8 Q5XIC0 Q9WVK3 Q9WVK7 Q9Z2M4 Q9Z311	GO_BP
Cluster2	lipid oxidation	14	58	145	22870	38.07	7.13e-19	B3DMA2 D3ZHR2 G3V796 P07896 P13803 P14604 P15650 P97852 Q2M2R8 Q5XIC0 Q9WVK3 Q9WVK7 Q9Z2M4 Q9Z311	GO_BP
Cluster2	lipid transport	3	58	421	22870	2.81	0.0912	D3ZHR2 P11915 P18163	GO_BP
Cluster2	liver development	8	58	342	22870	9.22	2.3e-06	F1LN88 G3V796 P07756 P07895 P97519 P97532 Q6P2A5 Q9ER34	GO_BP
Cluster2	localization	24	58	7927	22870	1.19	0.174	D3ZHR2 D3ZIQ1 F1M7X5 O55171 P07896 P10888 P11915 P12075 P18163 P19511 P21571 P27615 P28492 P63039 P97519 P97576 Q2M2R8 Q4FZT0 Q5XIC0 Q642G4 Q6AY30 Q8VID1 Q9WVK3 Q9Z2M4	GO_BP
Cluster2	localization of cell	2	58	1550	22870	0.51	0.911	F1M7X5 Q2M2R8	GO_BP
Cluster2	locomotion	2	58	1924	22870	0.41	0.961	F1M7X5 Q2M2R8	GO_BP
Cluster2	locomotory behavior	2	58	386	22870	2.04	0.256	F1M7X5 P07895	GO_BP
Cluster2	locomotory exploration behavior	1	58	36	22870	10.95	0.0874	F1M7X5	GO_BP
Cluster2	long-chain fatty acid catabolic process	2	58	13	22870	60.66	0.000484	D3ZHR2 P15650	GO_BP
Cluster2	long-chain fatty acid import	1	58	23	22870	17.14	0.0568	P18163	GO_BP
Cluster2	long-chain fatty acid metabolic process	5	58	255	22870	7.73	0.000469	D3ZHR2 D3ZIQ1 O55171 P15650 P18163	GO_BP
Cluster2	long-chain fatty acid transport	2	58	96	22870	8.21	0.0248	D3ZHR2 P18163	GO_BP
Cluster2	long-chain fatty-acyl-CoA biosynthetic process	1	58	26	22870	15.17	0.0639	P18163	GO_BP
Cluster2	long-chain fatty-acyl-CoA metabolic process	1	58	38	22870	10.38	0.0921	P18163	GO_BP
Cluster2	lymphocyte activation	3	58	629	22870	1.88	0.214	F1M7X5 P63039 Q4FZT0	GO_BP
Cluster2	lymphocyte activation involved in immune response	1	58	160	22870	2.46	0.335	P63039	GO_BP
Cluster2	lymphocyte costimulation	1	58	86	22870	4.59	0.197	F1M7X5	GO_BP
Cluster2	lymphocyte mediated immunity	1	58	225	22870	1.75	0.437	P63039	GO_BP
Cluster2	lymphocyte proliferation	1	58	136	22870	2.9	0.293	P63039	GO_BP
Cluster2	lysine biosynthetic process	1	58	3	22870	131.44	0.00759	A2VCW9	GO_BP
Cluster2	lysine biosynthetic process via aminoadipic acid	1	58	3	22870	131.44	0.00759	A2VCW9	GO_BP
Cluster2	lysine catabolic process	3	58	14	22870	84.5	5.52e-06	A2VCW9 Q64057 Q64602	GO_BP
Cluster2	lysine metabolic process	3	58	15	22870	78.86	6.89e-06	A2VCW9 Q64057 Q64602	GO_BP
Cluster2	lysosomal transport	1	58	145	22870	2.72	0.309	P27615	GO_BP
Cluster2	macromolecular complex assembly	12	58	2356	22870	2.01	0.0139	A2VCW9 D3ZLT1 G3V796 P07895 P15650 P97519 Q2M2R8 Q4FZT0 Q5XIH3 Q642G4 Q6P2A5 Q8VID1	GO_BP
Cluster2	macromolecular complex disassembly	1	58	311	22870	1.27	0.548	Q642G4	GO_BP
Cluster2	macromolecular complex subunit organization	12	58	2735	22870	1.73	0.0394	A2VCW9 D3ZLT1 G3V796 P07895 P15650 P97519 Q2M2R8 Q4FZT0 Q5XIH3 Q642G4 Q6P2A5 Q8VID1	GO_BP
Cluster2	macromolecule biosynthetic process	2	58	2809	22870	0.28	0.995	G3V796 P85834	GO_BP
Cluster2	macromolecule localization	17	58	3092	22870	2.17	0.00129	D3ZHR2 D3ZIQ1 O55171 P07896 P11915 P18163 P27615 P63039 P97519 P97576 Q2M2R8 Q4FZT0 Q5XIC0 Q642G4 Q8VID1 Q9WVK3 Q9Z2M4	GO_BP
Cluster2	macromolecule metabolic process	12	58	8752	22870	0.54	0.999	F1M7X5 G3V796 G3V7I0 P04636 P07756 P07896 P63039 P85834 Q2M2R8 Q4FZT0 Q5I0P2 Q642G4	GO_BP
Cluster2	macromolecule modification	6	58	4423	22870	0.53	0.979	G3V7I0 P04636 P07896 Q2M2R8 Q5I0P2 Q642G4	GO_BP
Cluster2	malate metabolic process	1	58	14	22870	28.17	0.0349	P04636	GO_BP
Cluster2	male gonad development	1	58	299	22870	1.32	0.534	P97852	GO_BP
Cluster2	male sex differentiation	1	58	335	22870	1.18	0.576	P97852	GO_BP
Cluster2	maternal placenta development	1	58	94	22870	4.19	0.213	G3V7I0	GO_BP
Cluster2	maternal process involved in female pregnancy	1	58	153	22870	2.58	0.323	G3V7I0	GO_BP
Cluster2	medium-chain fatty acid catabolic process	1	58	2	22870	197.16	0.00507	G3V796	GO_BP
Cluster2	medium-chain fatty acid metabolic process	1	58	24	22870	16.43	0.0592	G3V796	GO_BP
Cluster2	medium-chain fatty-acyl-CoA metabolic process	1	58	6	22870	65.72	0.0151	P97852	GO_BP
Cluster2	membrane fusion	1	58	274	22870	1.44	0.503	Q4FZT0	GO_BP
Cluster2	membrane invagination	1	58	93	22870	4.24	0.211	P27615	GO_BP
Cluster2	membrane organization	5	58	1187	22870	1.66	0.182	P19511 P21571 P27615 Q2M2R8 Q4FZT0	GO_BP
Cluster2	metabolic process	54	58	11902	22870	1.79	1.12e-11	A2VCW9 B0BNJ4 B3DMA2 D3Z900 D3ZHR2 D3ZIQ1 D3ZLT1 D4A2K1 F1LN88 F1M7X5 G3V6I4 G3V796 G3V7I0 G3V7J0 O55171 P04636 P07756 P07895 P07896 P08461 P10888 P11915 P12075 P13803 P14604 P15650 P18163 P19511 P21571 P27615 P28492 P29266 P63039 P85834 P97519 P97532 P97852 Q2M2R8 Q4FZT0 Q5I0P2 Q5XIC0 Q5XIH3 Q64057 Q642G4 Q64565 Q64602 Q6AYQ8 Q6P2A5 Q8VID1 Q9ER34 Q9WVK3 Q9WVK7 Q9Z2M4 Q9Z311	GO_BP
Cluster2	metal ion homeostasis	2	58	1044	22870	0.76	0.749	P07895 Q4FZT0	GO_BP
Cluster2	metal ion transport	1	58	1085	22870	0.36	0.941	Q4FZT0	GO_BP
Cluster2	metencephalon development	1	58	214	22870	1.84	0.421	Q6P2A5	GO_BP
Cluster2	methylation	1	58	358	22870	1.1	0.6	Q5I0P2	GO_BP
Cluster2	microtubule anchoring	1	58	37	22870	10.66	0.0897	Q642G4	GO_BP
Cluster2	microtubule cytoskeleton organization	1	58	691	22870	0.57	0.832	Q642G4	GO_BP
Cluster2	microtubule-based movement	1	58	390	22870	1.01	0.632	Q642G4	GO_BP
Cluster2	microtubule-based process	1	58	945	22870	0.42	0.914	Q642G4	GO_BP
Cluster2	microtubule-based transport	1	58	235	22870	1.68	0.451	Q642G4	GO_BP
Cluster2	midgut development	1	58	40	22870	9.86	0.0967	P07756	GO_BP
Cluster2	mitochondrial calcium ion transport	1	58	29	22870	13.6	0.071	Q4FZT0	GO_BP
Cluster2	mitochondrial fusion	1	58	29	22870	13.6	0.071	Q4FZT0	GO_BP
Cluster2	mitochondrial membrane organization	3	58	190	22870	6.23	0.0125	P19511 P21571 Q2M2R8	GO_BP
Cluster2	mitochondrial protein processing	1	58	15	22870	26.29	0.0374	Q4FZT0	GO_BP
Cluster2	mitochondrial respiratory chain complex I assembly	2	58	83	22870	9.5	0.0189	D3ZLT1 Q5XIH3	GO_BP
Cluster2	mitochondrial respiratory chain complex assembly	2	58	120	22870	6.57	0.0373	D3ZLT1 Q5XIH3	GO_BP
Cluster2	mitochondrial transmembrane transport	6	58	114	22870	20.75	4.4e-07	P12075 P19511 P21571 P63039 P97576 Q4FZT0	GO_BP
Cluster2	mitochondrial transport	6	58	354	22870	6.68	0.000271	P12075 P19511 P21571 P63039 P97576 Q4FZT0	GO_BP
Cluster2	mitochondrion organization	11	58	698	22870	6.21	1.22e-06	D3ZLT1 G3V7I0 P07895 P19511 P21571 P63039 P97519 P97576 Q2M2R8 Q4FZT0 Q5XIH3	GO_BP
Cluster2	monocarboxylic acid biosynthetic process	3	58	401	22870	2.95	0.0816	D4A2K1 Q9WVK3 Q9Z2M4	GO_BP
Cluster2	monocarboxylic acid catabolic process	17	58	194	22870	34.55	4.36e-22	B3DMA2 D3ZHR2 D4A2K1 G3V796 O55171 P07896 P13803 P14604 P15650 P97852 Q2M2R8 Q5XIC0 Q64565 Q9WVK3 Q9WVK7 Q9Z2M4 Q9Z311	GO_BP
Cluster2	monocarboxylic acid metabolic process	21	58	920	22870	9	3.22e-15	B3DMA2 D3ZHR2 D3ZIQ1 D4A2K1 G3V796 O55171 P07896 P08461 P13803 P14604 P15650 P18163 P27615 P97852 Q2M2R8 Q5XIC0 Q64565 Q9WVK3 Q9WVK7 Q9Z2M4 Q9Z311	GO_BP
Cluster2	monocarboxylic acid transport	2	58	258	22870	3.06	0.139	D3ZHR2 P18163	GO_BP
Cluster2	mononuclear cell proliferation	1	58	139	22870	2.84	0.298	P63039	GO_BP
Cluster2	monosaccharide biosynthetic process	1	58	108	22870	3.65	0.24	P04636	GO_BP
Cluster2	monosaccharide metabolic process	1	58	312	22870	1.26	0.55	P04636	GO_BP
Cluster2	monovalent inorganic cation transport	5	58	679	22870	2.9	0.0286	P10888 P12075 P19511 P21571 Q4FZT0	GO_BP
Cluster2	motor behavior	1	58	14	22870	28.17	0.0349	F1M7X5	GO_BP
Cluster2	movement of cell or subcellular component	3	58	2248	22870	0.53	0.933	F1M7X5 Q2M2R8 Q642G4	GO_BP
Cluster2	multi-multicellular organism process	1	58	580	22870	0.68	0.775	G3V7I0	GO_BP
Cluster2	multi-organism process	6	58	3403	22870	0.7	0.88	F1LN88 F1M7X5 G3V7I0 P07756 P07895 P63039	GO_BP
Cluster2	multi-organism reproductive process	1	58	1661	22870	0.24	0.987	G3V7I0	GO_BP
Cluster2	multicellular organism aging	1	58	81	22870	4.87	0.186	Q5U4F4	GO_BP
Cluster2	multicellular organism development	14	58	7713	22870	0.72	0.957	F1LN88 G3V796 G3V7I0 P07756 P07895 P27615 P63039 P97519 P97532 P97852 Q2M2R8 Q5U4F4 Q6P2A5 Q9ER34	GO_BP
Cluster2	multicellular organism reproduction	1	58	1407	22870	0.28	0.975	G3V7I0	GO_BP
Cluster2	multicellular organismal homeostasis	1	58	556	22870	0.71	0.761	P15650	GO_BP
Cluster2	multicellular organismal process	19	58	10426	22870	0.72	0.983	F1LN88 F1M7X5 G3V796 G3V7I0 P07756 P07895 P08461 P15650 P27615 P63039 P97519 P97532 P97852 Q2M2R8 Q4FZT0 Q5U4F4 Q64057 Q6P2A5 Q9ER34	GO_BP
Cluster2	multicellular organismal reproductive process	1	58	1395	22870	0.28	0.974	G3V7I0	GO_BP
Cluster2	multicellular organismal response to stress	1	58	214	22870	1.84	0.421	F1M7X5	GO_BP
Cluster2	muscle cell differentiation	1	58	477	22870	0.83	0.706	G3V796	GO_BP
Cluster2	muscle organ development	1	58	492	22870	0.8	0.717	Q6P2A5	GO_BP
Cluster2	muscle structure development	2	58	847	22870	0.93	0.638	G3V796 Q6P2A5	GO_BP
Cluster2	muscle tissue development	1	58	562	22870	0.7	0.764	G3V796	GO_BP
Cluster2	myeloid cell differentiation	1	58	409	22870	0.96	0.649	G3V7I0	GO_BP
Cluster2	negative regulation of RNA biosynthetic process	1	58	1825	22870	0.22	0.992	Q642G4	GO_BP
Cluster2	negative regulation of RNA metabolic process	1	58	1966	22870	0.2	0.995	Q642G4	GO_BP
Cluster2	negative regulation of apoptotic process	4	58	1583	22870	1	0.577	F1LN88 G3V7I0 P07895 P63039	GO_BP
Cluster2	negative regulation of apoptotic signaling pathway	1	58	421	22870	0.94	0.66	P07895	GO_BP
Cluster2	negative regulation of binding	1	58	279	22870	1.41	0.51	Q642G4	GO_BP
Cluster2	negative regulation of biological process	9	58	8114	22870	0.44	1	F1LN88 F1M7X5 G3V7I0 P07895 P15650 P63039 Q2M2R8 Q642G4 Q9WVK7	GO_BP
Cluster2	negative regulation of biosynthetic process	3	58	2416	22870	0.49	0.953	P15650 P63039 Q642G4	GO_BP
Cluster2	negative regulation of blood pressure	1	58	99	22870	3.98	0.223	P07895	GO_BP
Cluster2	negative regulation of catalytic activity	1	58	1306	22870	0.3	0.967	G3V7I0	GO_BP
Cluster2	negative regulation of cell communication	2	58	2262	22870	0.35	0.983	P07895 Q9WVK7	GO_BP
Cluster2	negative regulation of cell death	4	58	1825	22870	0.86	0.69	F1LN88 G3V7I0 P07895 P63039	GO_BP
Cluster2	negative regulation of cell differentiation	1	58	1241	22870	0.32	0.961	P07895	GO_BP
Cluster2	negative regulation of cell proliferation	1	58	1330	22870	0.3	0.969	P07895	GO_BP
Cluster2	negative regulation of cellular metabolic process	4	58	3932	22870	0.4	0.994	G3V7I0 P15650 P63039 Q642G4	GO_BP
Cluster2	negative regulation of cellular process	9	58	7349	22870	0.48	0.999	F1LN88 F1M7X5 G3V7I0 P07895 P15650 P63039 Q2M2R8 Q642G4 Q9WVK7	GO_BP
Cluster2	negative regulation of developmental process	1	58	1739	22870	0.23	0.99	P07895	GO_BP
Cluster2	negative regulation of endopeptidase activity	1	58	394	22870	1	0.635	G3V7I0	GO_BP
Cluster2	negative regulation of fat cell differentiation	1	58	77	22870	5.12	0.178	P07895	GO_BP
Cluster2	negative regulation of fatty acid oxidation	1	58	18	22870	21.91	0.0447	P15650	GO_BP
Cluster2	negative regulation of fibroblast proliferation	1	58	62	22870	6.36	0.146	P07895	GO_BP
Cluster2	negative regulation of gene expression	1	58	2617	22870	0.15	0.999	Q642G4	GO_BP
Cluster2	negative regulation of hormone secretion	1	58	234	22870	1.69	0.45	Q9WVK7	GO_BP
Cluster2	negative regulation of hydrolase activity	1	58	710	22870	0.56	0.84	G3V7I0	GO_BP
Cluster2	negative regulation of insulin secretion	1	58	100	22870	3.94	0.225	Q9WVK7	GO_BP
Cluster2	negative regulation of kinase activity	1	58	440	22870	0.9	0.676	G3V7I0	GO_BP
Cluster2	negative regulation of lipid biosynthetic process	1	58	163	22870	2.42	0.34	P15650	GO_BP
Cluster2	negative regulation of lipid metabolic process	1	58	233	22870	1.69	0.448	P15650	GO_BP
Cluster2	negative regulation of metabolic process	4	58	4383	22870	0.36	0.998	G3V7I0 P15650 P63039 Q642G4	GO_BP
Cluster2	negative regulation of molecular function	2	58	1856	22870	0.42	0.955	G3V7I0 Q642G4	GO_BP
Cluster2	negative regulation of neuron apoptotic process	3	58	288	22870	4.11	0.0367	G3V7I0 P07895 P63039	GO_BP
Cluster2	negative regulation of neuron death	3	58	405	22870	2.92	0.0835	G3V7I0 P07895 P63039	GO_BP
Cluster2	negative regulation of peptidase activity	1	58	413	22870	0.95	0.653	G3V7I0	GO_BP
Cluster2	negative regulation of peptide hormone secretion	1	58	164	22870	2.4	0.342	Q9WVK7	GO_BP
Cluster2	negative regulation of peptide secretion	1	58	298	22870	1.32	0.533	Q9WVK7	GO_BP
Cluster2	negative regulation of phosphate metabolic process	1	58	949	22870	0.42	0.915	G3V7I0	GO_BP
Cluster2	negative regulation of phosphorylation	1	58	786	22870	0.5	0.869	G3V7I0	GO_BP
Cluster2	negative regulation of programmed cell death	4	58	1627	22870	0.97	0.599	F1LN88 G3V7I0 P07895 P63039	GO_BP
Cluster2	negative regulation of protein binding	1	58	186	22870	2.12	0.378	Q642G4	GO_BP
Cluster2	negative regulation of protein complex assembly	2	58	189	22870	4.17	0.0832	Q2M2R8 Q642G4	GO_BP
Cluster2	negative regulation of protein homooligomerization	2	58	19	22870	41.51	0.00105	Q2M2R8 Q642G4	GO_BP
Cluster2	negative regulation of protein homotetramerization	2	58	6	22870	131.44	9.42e-05	Q2M2R8 Q642G4	GO_BP
Cluster2	negative regulation of protein metabolic process	1	58	1781	22870	0.22	0.991	G3V7I0	GO_BP
Cluster2	negative regulation of protein oligomerization	2	58	25	22870	31.54	0.00183	Q2M2R8 Q642G4	GO_BP
Cluster2	negative regulation of protein secretion	1	58	237	22870	1.66	0.454	Q9WVK7	GO_BP
Cluster2	negative regulation of protein tetramerization	2	58	6	22870	131.44	9.42e-05	Q2M2R8 Q642G4	GO_BP
Cluster2	negative regulation of protein transport	1	58	335	22870	1.18	0.576	Q9WVK7	GO_BP
Cluster2	negative regulation of proteolysis	1	58	582	22870	0.68	0.776	G3V7I0	GO_BP
Cluster2	negative regulation of response to stimulus	1	58	2647	22870	0.15	0.999	P07895	GO_BP
Cluster2	negative regulation of secretion	1	58	515	22870	0.77	0.734	Q9WVK7	GO_BP
Cluster2	negative regulation of secretion by cell	1	58	453	22870	0.87	0.687	Q9WVK7	GO_BP
Cluster2	negative regulation of signal transduction	1	58	2024	22870	0.19	0.995	P07895	GO_BP
Cluster2	negative regulation of signaling	2	58	2265	22870	0.35	0.983	P07895 Q9WVK7	GO_BP
Cluster2	negative regulation of transferase activity	1	58	491	22870	0.8	0.716	G3V7I0	GO_BP
Cluster2	negative regulation of transport	1	58	1018	22870	0.39	0.929	Q9WVK7	GO_BP
Cluster2	nervous system development	5	58	4016	22870	0.49	0.983	P07895 P27615 P97532 Q2M2R8 Q6P2A5	GO_BP
Cluster2	neurogenesis	3	58	2936	22870	0.4	0.984	P07895 P27615 Q2M2R8	GO_BP
Cluster2	neurological system process	3	58	2127	22870	0.56	0.916	P07895 Q2M2R8 Q64057	GO_BP
Cluster2	neuromuscular process	1	58	202	22870	1.95	0.403	Q2M2R8	GO_BP
Cluster2	neuron development	1	58	1449	22870	0.27	0.978	P07895	GO_BP
Cluster2	neuron differentiation	2	58	1777	22870	0.44	0.946	P07895 Q2M2R8	GO_BP
Cluster2	neuron migration	1	58	249	22870	1.58	0.47	Q2M2R8	GO_BP
Cluster2	neurotransmitter biosynthetic process	1	58	80	22870	4.93	0.184	Q64565	GO_BP
Cluster2	neurotransmitter catabolic process	3	58	31	22870	38.16	6.62e-05	G3V7J0 Q5I0P2 Q64057	GO_BP
Cluster2	neurotransmitter metabolic process	5	58	147	22870	13.41	3.57e-05	G3V7J0 P07756 Q5I0P2 Q64057 Q64565	GO_BP
Cluster2	neutral lipid biosynthetic process	1	58	34	22870	11.6	0.0828	P18163	GO_BP
Cluster2	neutral lipid catabolic process	1	58	66	22870	5.97	0.155	P07756	GO_BP
Cluster2	neutral lipid metabolic process	2	58	168	22870	4.69	0.0679	P07756 P18163	GO_BP
Cluster2	nicotinamide nucleotide metabolic process	2	58	230	22870	3.43	0.116	P04636 P08461	GO_BP
Cluster2	nitrate metabolic process	2	58	5	22870	157.72	6.29e-05	D3Z900 G3V6I4	GO_BP
Cluster2	nitric oxide metabolic process	1	58	32	22870	12.32	0.0781	P07756	GO_BP
Cluster2	nitrogen compound metabolic process	40	58	10203	22870	1.55	0.000153	A2VCW9 B0BNJ4 D3Z900 D3ZIQ1 D3ZLT1 D4A2K1 F1M7X5 G3V6I4 G3V796 G3V7I0 G3V7J0 O55171 P04636 P07756 P07895 P07896 P08461 P10888 P11915 P12075 P15650 P18163 P19511 P21571 P28492 P29266 P63039 P85834 P97519 P97532 P97852 Q2M2R8 Q4FZT0 Q5I0P2 Q5XIH3 Q64057 Q642G4 Q64565 Q64602 Q6P2A5	GO_BP
Cluster2	nitrogen compound transport	14	58	2099	22870	2.63	0.000608	D3ZIQ1 O55171 P07896 P27615 P28492 P63039 P97519 P97576 Q2M2R8 Q5XIC0 Q642G4 Q8VID1 Q9WVK3 Q9Z2M4	GO_BP
Cluster2	nitrogen cycle metabolic process	1	58	34	22870	11.6	0.0828	P07756	GO_BP
Cluster2	nucleic acid metabolic process	1	58	3300	22870	0.12	1	P63039	GO_BP
Cluster2	nucleobase catabolic process	1	58	20	22870	19.72	0.0495	G3V7J0	GO_BP
Cluster2	nucleobase metabolic process	1	58	60	22870	6.57	0.141	G3V7J0	GO_BP
Cluster2	nucleobase-containing compound metabolic process	19	58	4375	22870	1.71	0.00954	D3ZIQ1 D3ZLT1 G3V7J0 O55171 P04636 P07896 P08461 P10888 P11915 P12075 P18163 P19511 P21571 P63039 P97519 P97852 Q4FZT0 Q5XIH3 Q6P2A5	GO_BP
Cluster2	nucleoside bisphosphate biosynthetic process	2	58	86	22870	9.17	0.0202	P08461 P18163	GO_BP
Cluster2	nucleoside bisphosphate metabolic process	8	58	216	22870	14.6	7.11e-08	D3ZIQ1 O55171 P07896 P08461 P11915 P18163 P97519 P97852	GO_BP
Cluster2	nucleoside diphosphate biosynthetic process	1	58	17	22870	23.19	0.0423	Q6P2A5	GO_BP
Cluster2	nucleoside diphosphate metabolic process	1	58	175	22870	2.25	0.36	Q6P2A5	GO_BP
Cluster2	nucleoside metabolic process	1	58	195	22870	2.02	0.392	Q6P2A5	GO_BP
Cluster2	nucleoside monophosphate biosynthetic process	5	58	213	22870	9.26	0.000205	P12075 P19511 P21571 Q4FZT0 Q6P2A5	GO_BP
Cluster2	nucleoside monophosphate metabolic process	8	58	431	22870	7.32	1.25e-05	D3ZLT1 P10888 P12075 P19511 P21571 Q4FZT0 Q5XIH3 Q6P2A5	GO_BP
Cluster2	nucleoside monophosphate phosphorylation	1	58	54	22870	7.3	0.128	Q6P2A5	GO_BP
Cluster2	nucleoside phosphate biosynthetic process	7	58	467	22870	5.91	0.000173	P08461 P12075 P18163 P19511 P21571 Q4FZT0 Q6P2A5	GO_BP
Cluster2	nucleoside phosphate metabolic process	17	58	965	22870	6.95	1.43e-10	D3ZIQ1 D3ZLT1 O55171 P04636 P07896 P08461 P10888 P11915 P12075 P18163 P19511 P21571 P97519 P97852 Q4FZT0 Q5XIH3 Q6P2A5	GO_BP
Cluster2	nucleoside triphosphate biosynthetic process	5	58	177	22870	11.14	8.63e-05	P12075 P19511 P21571 Q4FZT0 Q6P2A5	GO_BP
Cluster2	nucleoside triphosphate metabolic process	8	58	388	22870	8.13	5.84e-06	D3ZLT1 P10888 P12075 P19511 P21571 Q4FZT0 Q5XIH3 Q6P2A5	GO_BP
Cluster2	nucleotide biosynthetic process	7	58	463	22870	5.96	0.000164	P08461 P12075 P18163 P19511 P21571 Q4FZT0 Q6P2A5	GO_BP
Cluster2	nucleotide metabolic process	17	58	952	22870	7.04	1.16e-10	D3ZIQ1 D3ZLT1 O55171 P04636 P07896 P08461 P10888 P11915 P12075 P18163 P19511 P21571 P97519 P97852 Q4FZT0 Q5XIH3 Q6P2A5	GO_BP
Cluster2	olfactory bulb development	1	58	74	22870	5.33	0.172	Q6P2A5	GO_BP
Cluster2	olfactory lobe development	1	58	77	22870	5.12	0.178	Q6P2A5	GO_BP
Cluster2	organelle fusion	1	58	191	22870	2.06	0.386	Q4FZT0	GO_BP
Cluster2	organelle localization	1	58	927	22870	0.43	0.91	Q642G4	GO_BP
Cluster2	organelle organization	22	58	4718	22870	1.84	0.00184	D3ZHR2 D3ZIQ1 D3ZLT1 G3V7I0 O55171 P07895 P07896 P11915 P19511 P21571 P63039 P97519 P97576 Q2M2R8 Q4FZT0 Q5U4F4 Q5XIC0 Q5XIH3 Q642G4 Q8VID1 Q9WVK3 Q9Z2M4	GO_BP
Cluster2	organelle transport along microtubule	1	58	109	22870	3.62	0.242	Q642G4	GO_BP
Cluster2	organic acid biosynthetic process	7	58	574	22870	4.81	0.0006	A2VCW9 D4A2K1 P07756 P28492 Q64565 Q9WVK3 Q9Z2M4	GO_BP
Cluster2	organic acid catabolic process	27	58	385	22870	27.65	8.37e-33	A2VCW9 B3DMA2 D3ZHR2 D3ZIQ1 D4A2K1 G3V796 G3V7J0 O55171 P07896 P13803 P14604 P15650 P28492 P29266 P97519 P97532 P97852 Q2M2R8 Q5I0P2 Q5XIC0 Q64057 Q64565 Q64602 Q9WVK3 Q9WVK7 Q9Z2M4 Q9Z311	GO_BP
Cluster2	organic acid metabolic process	36	58	1633	22870	8.69	4.51e-27	A2VCW9 B3DMA2 D3Z900 D3ZHR2 D3ZIQ1 D4A2K1 G3V6I4 G3V796 G3V7J0 O55171 P04636 P07756 P07896 P08461 P13803 P14604 P15650 P18163 P27615 P28492 P29266 P97519 P97532 P97852 Q2M2R8 Q5I0P2 Q5XIC0 Q64057 Q64565 Q64602 Q6AYQ8 Q9ER34 Q9WVK3 Q9WVK7 Q9Z2M4 Q9Z311	GO_BP
Cluster2	organic acid transport	3	58	454	22870	2.61	0.108	D3ZHR2 P18163 P28492	GO_BP
Cluster2	organic anion transport	4	58	705	22870	2.24	0.103	D3ZHR2 P11915 P18163 P28492	GO_BP
Cluster2	organic cyclic compound biosynthetic process	8	58	2381	22870	1.32	0.253	P08461 P11915 P12075 P18163 P19511 P21571 Q4FZT0 Q6P2A5	GO_BP
Cluster2	organic cyclic compound catabolic process	2	58	758	22870	1.04	0.577	G3V7J0 Q64602	GO_BP
Cluster2	organic cyclic compound metabolic process	21	58	5094	22870	1.63	0.011	D3ZIQ1 D3ZLT1 G3V7J0 O55171 P04636 P07896 P08461 P10888 P11915 P12075 P18163 P19511 P21571 P63039 P97519 P97852 Q4FZT0 Q5XIH3 Q64602 Q6P2A5 Q8VID1	GO_BP
Cluster2	organic hydroxy compound biosynthetic process	1	58	286	22870	1.38	0.518	P11915	GO_BP
Cluster2	organic hydroxy compound metabolic process	5	58	728	22870	2.71	0.037	F1LN88 P11915 P97852 Q8VID1 Q9WVK3	GO_BP
Cluster2	organic hydroxy compound transport	1	58	284	22870	1.39	0.516	P11915	GO_BP
Cluster2	organic substance biosynthetic process	19	58	4574	22870	1.64	0.0152	A2VCW9 D4A2K1 G3V796 P04636 P07756 P08461 P11915 P12075 P18163 P19511 P21571 P28492 P85834 P97519 Q4FZT0 Q64565 Q6P2A5 Q9WVK3 Q9Z2M4	GO_BP
Cluster2	organic substance catabolic process	28	58	2242	22870	4.92	7.53e-14	A2VCW9 B3DMA2 D3ZHR2 D3ZIQ1 D4A2K1 G3V796 G3V7J0 O55171 P07756 P07896 P13803 P14604 P15650 P28492 P29266 P97519 P97532 P97852 Q2M2R8 Q5I0P2 Q5XIC0 Q64057 Q64565 Q64602 Q9WVK3 Q9WVK7 Q9Z2M4 Q9Z311	GO_BP
Cluster2	organic substance metabolic process	54	58	11441	22870	1.86	1.54e-12	A2VCW9 B0BNJ4 B3DMA2 D3Z900 D3ZHR2 D3ZIQ1 D3ZLT1 D4A2K1 F1LN88 F1M7X5 G3V6I4 G3V796 G3V7I0 G3V7J0 O55171 P04636 P07756 P07895 P07896 P08461 P10888 P11915 P12075 P13803 P14604 P15650 P18163 P19511 P21571 P27615 P28492 P29266 P63039 P85834 P97519 P97532 P97852 Q2M2R8 Q4FZT0 Q5I0P2 Q5XIC0 Q5XIH3 Q64057 Q642G4 Q64565 Q64602 Q6AYQ8 Q6P2A5 Q8VID1 Q9ER34 Q9WVK3 Q9WVK7 Q9Z2M4 Q9Z311	GO_BP
Cluster2	organic substance transport	17	58	2613	22870	2.57	0.00018	D3ZHR2 D3ZIQ1 O55171 P07896 P11915 P18163 P27615 P28492 P63039 P97519 P97576 Q2M2R8 Q5XIC0 Q642G4 Q8VID1 Q9WVK3 Q9Z2M4	GO_BP
Cluster2	organonitrogen compound biosynthetic process	13	58	2068	22870	2.48	0.00171	A2VCW9 G3V796 P07756 P08461 P12075 P18163 P19511 P21571 P28492 P85834 Q4FZT0 Q64565 Q6P2A5	GO_BP
Cluster2	organonitrogen compound catabolic process	12	58	1320	22870	3.58	9.76e-05	A2VCW9 D4A2K1 G3V7J0 P15650 P28492 P29266 P97519 P97532 Q5I0P2 Q64057 Q64565 Q64602	GO_BP
Cluster2	organonitrogen compound metabolic process	37	58	7700	22870	1.89	2.59e-06	A2VCW9 B0BNJ4 D3ZIQ1 D3ZLT1 D4A2K1 F1M7X5 G3V796 G3V7I0 G3V7J0 O55171 P04636 P07756 P07895 P07896 P08461 P10888 P11915 P12075 P15650 P18163 P19511 P21571 P28492 P29266 P85834 P97519 P97532 P97852 Q2M2R8 Q4FZT0 Q5I0P2 Q5XIH3 Q64057 Q642G4 Q64565 Q64602 Q6P2A5	GO_BP
Cluster2	organophosphate biosynthetic process	9	58	887	22870	4	0.000368	P07756 P08461 P11915 P12075 P18163 P19511 P21571 Q4FZT0 Q6P2A5	GO_BP
Cluster2	organophosphate ester transport	1	58	147	22870	2.68	0.312	P11915	GO_BP
Cluster2	organophosphate metabolic process	18	58	1643	22870	4.32	6.65e-08	D3ZIQ1 D3ZLT1 O55171 P04636 P07756 P07896 P08461 P10888 P11915 P12075 P18163 P19511 P21571 P97519 P97852 Q4FZT0 Q5XIH3 Q6P2A5	GO_BP
Cluster2	oxalate metabolic process	1	58	1	22870	394.31	0.00254	D4A2K1	GO_BP
Cluster2	oxaloacetate metabolic process	1	58	26	22870	15.17	0.0639	P04636	GO_BP
Cluster2	oxidation-reduction process	32	58	1420	22870	8.89	7.82e-24	A2VCW9 B0BNJ4 B3DMA2 D3Z900 D3ZHR2 D3ZLT1 F1LN88 G3V6I4 G3V796 G3V7I0 G3V7J0 P04636 P07895 P07896 P10888 P12075 P13803 P14604 P15650 P29266 P97852 Q2M2R8 Q5XIC0 Q5XIH3 Q64057 Q6AYQ8 Q8VID1 Q9ER34 Q9WVK3 Q9WVK7 Q9Z2M4 Q9Z311	GO_BP
Cluster2	oxidative phosphorylation	7	58	132	22870	20.91	4.28e-08	D3ZLT1 P10888 P12075 P19511 P21571 Q4FZT0 Q5XIH3	GO_BP
Cluster2	oxidoreduction coenzyme metabolic process	2	58	249	22870	3.17	0.132	P04636 P08461	GO_BP
Cluster2	oxoacid metabolic process	36	58	1610	22870	8.82	2.75e-27	A2VCW9 B3DMA2 D3Z900 D3ZHR2 D3ZIQ1 D4A2K1 G3V6I4 G3V796 G3V7J0 O55171 P04636 P07756 P07896 P08461 P13803 P14604 P15650 P18163 P27615 P28492 P29266 P97519 P97532 P97852 Q2M2R8 Q5I0P2 Q5XIC0 Q64057 Q64565 Q64602 Q6AYQ8 Q9ER34 Q9WVK3 Q9WVK7 Q9Z2M4 Q9Z311	GO_BP
Cluster2	oxygen homeostasis	1	58	12	22870	32.86	0.03	P07895	GO_BP
Cluster2	pallium development	1	58	360	22870	1.1	0.602	Q2M2R8	GO_BP
Cluster2	pattern recognition receptor signaling pathway	1	58	167	22870	2.36	0.347	P63039	GO_BP
Cluster2	peptide biosynthetic process	1	58	645	22870	0.61	0.81	P85834	GO_BP
Cluster2	peptide metabolic process	3	58	865	22870	1.37	0.377	B0BNJ4 P07895 P85834	GO_BP
Cluster2	peptide transport	13	58	1638	22870	3.13	0.000187	D3ZIQ1 O55171 P07896 P27615 P63039 P97519 P97576 Q2M2R8 Q5XIC0 Q642G4 Q8VID1 Q9WVK3 Q9Z2M4	GO_BP
Cluster2	peptidyl-amino acid modification	2	58	1372	22870	0.57	0.87	G3V7I0 Q5I0P2	GO_BP
Cluster2	peptidyl-cysteine modification	1	58	58	22870	6.8	0.137	G3V7I0	GO_BP
Cluster2	peptidyl-cysteine oxidation	1	58	7	22870	56.33	0.0176	G3V7I0	GO_BP
Cluster2	peptidyl-lysine modification	1	58	376	22870	1.05	0.618	Q5I0P2	GO_BP
Cluster2	peroxisomal long-chain fatty acid import	1	58	2	22870	197.16	0.00507	D3ZHR2	GO_BP
Cluster2	peroxisomal membrane transport	3	58	25	22870	47.32	3.42e-05	D3ZHR2 Q2M2R8 Q642G4	GO_BP
Cluster2	peroxisomal transport	11	58	96	22870	45.18	7.64e-16	D3ZHR2 D3ZIQ1 O55171 P07896 P97519 Q2M2R8 Q5XIC0 Q642G4 Q8VID1 Q9WVK3 Q9Z2M4	GO_BP
Cluster2	peroxisome organization	13	58	112	22870	45.77	1.19e-18	D3ZHR2 D3ZIQ1 O55171 P07896 P11915 P97519 Q2M2R8 Q5U4F4 Q5XIC0 Q642G4 Q8VID1 Q9WVK3 Q9Z2M4	GO_BP
Cluster2	peroxisome transport along microtubule	1	58	1	22870	394.31	0.00254	Q642G4	GO_BP
Cluster2	phagocytosis	1	58	298	22870	1.32	0.533	P27615	GO_BP
Cluster2	phagocytosis, engulfment	1	58	73	22870	5.4	0.169	P27615	GO_BP
Cluster2	phosphate-containing compound metabolic process	18	58	3296	22870	2.15	0.000959	D3ZIQ1 D3ZLT1 O55171 P04636 P07756 P07896 P08461 P10888 P11915 P12075 P18163 P19511 P21571 P97519 P97852 Q4FZT0 Q5XIH3 Q6P2A5	GO_BP
Cluster2	phospholipid transport	1	58	112	22870	3.52	0.248	P11915	GO_BP
Cluster2	phosphorus metabolic process	18	58	3322	22870	2.14	0.00105	D3ZIQ1 D3ZLT1 O55171 P04636 P07756 P07896 P08461 P10888 P11915 P12075 P18163 P19511 P21571 P97519 P97852 Q4FZT0 Q5XIH3 Q6P2A5	GO_BP
Cluster2	phosphorylation	8	58	1977	22870	1.6	0.125	D3ZLT1 P10888 P12075 P19511 P21571 Q4FZT0 Q5XIH3 Q6P2A5	GO_BP
Cluster2	phytol metabolic process	1	58	7	22870	56.33	0.0176	Q9WVK3	GO_BP
Cluster2	pigment cell differentiation	1	58	53	22870	7.44	0.126	P07895	GO_BP
Cluster2	pigmentation	1	58	151	22870	2.61	0.319	P07895	GO_BP
Cluster2	placenta development	1	58	302	22870	1.31	0.538	G3V7I0	GO_BP
Cluster2	plasma membrane invagination	1	58	83	22870	4.75	0.19	P27615	GO_BP
Cluster2	platelet degranulation	1	58	226	22870	1.74	0.438	Q6AY30	GO_BP
Cluster2	polyol biosynthetic process	1	58	66	22870	5.97	0.155	P11915	GO_BP
Cluster2	polyol metabolic process	1	58	170	22870	2.32	0.352	P11915	GO_BP
Cluster2	polysaccharide biosynthetic process	1	58	51	22870	7.73	0.122	G3V796	GO_BP
Cluster2	polysaccharide metabolic process	1	58	100	22870	3.94	0.225	G3V796	GO_BP
Cluster2	positive regulation of ATPase activity	1	58	102	22870	3.87	0.229	P97576	GO_BP
Cluster2	positive regulation of DNA metabolic process	1	58	365	22870	1.08	0.607	Q4FZT0	GO_BP
Cluster2	positive regulation of DNA replication	1	58	64	22870	6.16	0.15	Q4FZT0	GO_BP
Cluster2	positive regulation of T cell activation	2	58	343	22870	2.3	0.216	F1M7X5 P63039	GO_BP
Cluster2	positive regulation of T cell mediated immunity	1	58	101	22870	3.9	0.227	P63039	GO_BP
Cluster2	positive regulation of adaptive immune response	1	58	214	22870	1.84	0.421	P63039	GO_BP
Cluster2	positive regulation of apoptotic process	3	58	1169	22870	1.01	0.575	P07895 P11915 P63039	GO_BP
Cluster2	positive regulation of biological process	11	58	9166	22870	0.47	1	F1M7X5 G3V7I0 P07895 P11915 P18163 P27615 P63039 Q2M2R8 Q4FZT0 Q5U4F4 Q64565	GO_BP
Cluster2	positive regulation of biosynthetic process	4	58	3149	22870	0.5	0.967	P07895 P11915 Q4FZT0 Q64565	GO_BP
Cluster2	positive regulation of blood vessel diameter	2	58	140	22870	5.63	0.0492	P07756 P07895	GO_BP
Cluster2	positive regulation of catalytic activity	3	58	2262	22870	0.52	0.935	P18163 P63039 P97576	GO_BP
Cluster2	positive regulation of cell activation	2	58	590	22870	1.34	0.443	F1M7X5 P63039	GO_BP
Cluster2	positive regulation of cell adhesion	2	58	727	22870	1.08	0.554	F1M7X5 P63039	GO_BP
Cluster2	positive regulation of cell death	3	58	1295	22870	0.91	0.645	P07895 P11915 P63039	GO_BP
Cluster2	positive regulation of cell development	1	58	1134	22870	0.35	0.948	P27615	GO_BP
Cluster2	positive regulation of cell differentiation	2	58	1886	22870	0.42	0.958	P07895 P27615	GO_BP
Cluster2	positive regulation of cell migration	1	58	895	22870	0.44	0.902	P07895	GO_BP
Cluster2	positive regulation of cell motility	1	58	925	22870	0.43	0.909	P07895	GO_BP
Cluster2	positive regulation of cell proliferation	2	58	1620	22870	0.49	0.924	F1M7X5 G3V7I0	GO_BP
Cluster2	positive regulation of cell-cell adhesion	2	58	439	22870	1.8	0.306	F1M7X5 P63039	GO_BP
Cluster2	positive regulation of cellular component movement	1	58	962	22870	0.41	0.918	P07895	GO_BP
Cluster2	positive regulation of cellular metabolic process	5	58	5101	22870	0.39	0.998	P07895 P18163 P63039 Q4FZT0 Q64565	GO_BP
Cluster2	positive regulation of cellular process	9	58	8277	22870	0.43	1	F1M7X5 G3V7I0 P07895 P11915 P18163 P27615 P63039 Q4FZT0 Q64565	GO_BP
Cluster2	positive regulation of cholesterol import	1	58	5	22870	78.86	0.0126	P11915	GO_BP
Cluster2	positive regulation of cholesterol transport	1	58	38	22870	10.38	0.0921	P11915	GO_BP
Cluster2	positive regulation of cytokine production	1	58	769	22870	0.51	0.863	P63039	GO_BP
Cluster2	positive regulation of cytokine secretion	1	58	270	22870	1.46	0.498	P63039	GO_BP
Cluster2	positive regulation of defense response	1	58	621	22870	0.63	0.798	P63039	GO_BP
Cluster2	positive regulation of developmental growth	1	58	383	22870	1.03	0.625	Q2M2R8	GO_BP
Cluster2	positive regulation of developmental process	3	58	2567	22870	0.46	0.965	P07895 P27615 Q2M2R8	GO_BP
Cluster2	positive regulation of endopeptidase activity	1	58	291	22870	1.36	0.525	P63039	GO_BP
Cluster2	positive regulation of gene expression	1	58	3135	22870	0.13	1	Q5U4F4	GO_BP
Cluster2	positive regulation of growth	1	58	536	22870	0.74	0.748	Q2M2R8	GO_BP
Cluster2	positive regulation of hydrolase activity	2	58	1156	22870	0.68	0.799	P63039 P97576	GO_BP
Cluster2	positive regulation of immune effector process	1	58	390	22870	1.01	0.632	P63039	GO_BP
Cluster2	positive regulation of immune response	2	58	974	22870	0.81	0.714	P63039 Q4FZT0	GO_BP
Cluster2	positive regulation of immune system process	3	58	1521	22870	0.78	0.751	F1M7X5 P63039 Q4FZT0	GO_BP
Cluster2	positive regulation of inflammatory response	1	58	232	22870	1.7	0.447	P63039	GO_BP
Cluster2	positive regulation of innate immune response	1	58	399	22870	0.99	0.64	P63039	GO_BP
Cluster2	positive regulation of interferon-alpha production	1	58	32	22870	12.32	0.0781	P63039	GO_BP
Cluster2	positive regulation of interferon-gamma production	1	58	112	22870	3.52	0.248	P63039	GO_BP
Cluster2	positive regulation of interleukin-10 production	1	58	50	22870	7.89	0.119	P63039	GO_BP
Cluster2	positive regulation of interleukin-12 production	1	58	74	22870	5.33	0.172	P63039	GO_BP
Cluster2	positive regulation of interleukin-6 production	1	58	153	22870	2.58	0.323	P63039	GO_BP
Cluster2	positive regulation of interleukin-6 secretion	1	58	48	22870	8.21	0.115	P63039	GO_BP
Cluster2	positive regulation of intracellular transport	1	58	356	22870	1.11	0.598	P11915	GO_BP
Cluster2	positive regulation of kinase activity	1	58	999	22870	0.39	0.925	P18163	GO_BP
Cluster2	positive regulation of leukocyte activation	2	58	564	22870	1.4	0.421	F1M7X5 P63039	GO_BP
Cluster2	positive regulation of leukocyte mediated immunity	1	58	244	22870	1.62	0.464	P63039	GO_BP
Cluster2	positive regulation of lipid biosynthetic process	1	58	226	22870	1.74	0.438	P11915	GO_BP
Cluster2	positive regulation of lipid metabolic process	2	58	366	22870	2.15	0.238	P11915 Q4FZT0	GO_BP
Cluster2	positive regulation of lipid storage	1	58	44	22870	8.96	0.106	Q5U4F4	GO_BP
Cluster2	positive regulation of lipid transport	1	58	127	22870	3.1	0.276	P11915	GO_BP
Cluster2	positive regulation of locomotion	1	58	976	22870	0.4	0.921	P07895	GO_BP
Cluster2	positive regulation of lymphocyte activation	2	58	479	22870	1.65	0.344	F1M7X5 P63039	GO_BP
Cluster2	positive regulation of macrophage activation	1	58	52	22870	7.58	0.124	P63039	GO_BP
Cluster2	positive regulation of membrane potential	2	58	63	22870	12.52	0.0112	Q4FZT0 Q5U4F4	GO_BP
Cluster2	positive regulation of metabolic process	7	58	5510	22870	0.5	0.993	P07895 P11915 P18163 P63039 Q4FZT0 Q5U4F4 Q64565	GO_BP
Cluster2	positive regulation of mitochondrion organization	1	58	167	22870	2.36	0.347	Q4FZT0	GO_BP
Cluster2	positive regulation of molecular function	4	58	2896	22870	0.54	0.947	G3V7I0 P18163 P63039 P97576	GO_BP
Cluster2	positive regulation of muscle cell differentiation	1	58	172	22870	2.29	0.355	P07895	GO_BP
Cluster2	positive regulation of nervous system development	1	58	1098	22870	0.36	0.943	P27615	GO_BP
Cluster2	positive regulation of neurogenesis	1	58	993	22870	0.4	0.924	P27615	GO_BP
Cluster2	positive regulation of neuron differentiation	1	58	810	22870	0.49	0.877	P27615	GO_BP
Cluster2	positive regulation of organelle organization	1	58	979	22870	0.4	0.921	Q4FZT0	GO_BP
Cluster2	positive regulation of peptidase activity	1	58	322	22870	1.22	0.561	P63039	GO_BP
Cluster2	positive regulation of peptide secretion	1	58	606	22870	0.65	0.79	P63039	GO_BP
Cluster2	positive regulation of phenotypic switching	1	58	3	22870	131.44	0.00759	P07895	GO_BP
Cluster2	positive regulation of phosphate metabolic process	2	58	1917	22870	0.41	0.961	P18163 Q4FZT0	GO_BP
Cluster2	positive regulation of phosphorylation	1	58	1789	22870	0.22	0.991	P18163	GO_BP
Cluster2	positive regulation of programmed cell death	3	58	1180	22870	1	0.581	P07895 P11915 P63039	GO_BP
Cluster2	positive regulation of protein kinase activity	1	58	900	22870	0.44	0.903	P18163	GO_BP
Cluster2	positive regulation of protein metabolic process	2	58	2743	22870	0.29	0.995	P18163 P63039	GO_BP
Cluster2	positive regulation of protein phosphorylation	1	58	1683	22870	0.23	0.988	P18163	GO_BP
Cluster2	positive regulation of protein secretion	1	58	549	22870	0.72	0.756	P63039	GO_BP
Cluster2	positive regulation of protein transport	1	58	780	22870	0.51	0.867	P63039	GO_BP
Cluster2	positive regulation of proteolysis	1	58	606	22870	0.65	0.79	P63039	GO_BP
Cluster2	positive regulation of response to biotic stimulus	1	58	95	22870	4.15	0.215	P63039	GO_BP
Cluster2	positive regulation of response to stimulus	2	58	3523	22870	0.22	0.999	P63039 Q4FZT0	GO_BP
Cluster2	positive regulation of response to tumor cell	1	58	25	22870	15.77	0.0615	P63039	GO_BP
Cluster2	positive regulation of secretion	1	58	969	22870	0.41	0.919	P63039	GO_BP
Cluster2	positive regulation of secretion by cell	1	58	863	22870	0.46	0.893	P63039	GO_BP
Cluster2	positive regulation of steroid metabolic process	1	58	68	22870	5.8	0.159	P11915	GO_BP
Cluster2	positive regulation of sterol import	1	58	5	22870	78.86	0.0126	P11915	GO_BP
Cluster2	positive regulation of sterol transport	1	58	38	22870	10.38	0.0921	P11915	GO_BP
Cluster2	positive regulation of transferase activity	1	58	1111	22870	0.35	0.945	P18163	GO_BP
Cluster2	positive regulation of transport	2	58	2019	22870	0.39	0.969	P11915 P63039	GO_BP
Cluster2	positive regulation of vasculature development	1	58	341	22870	1.16	0.582	P07895	GO_BP
Cluster2	post-embryonic development	2	58	222	22870	3.55	0.109	G3V796 P07895	GO_BP
Cluster2	primary alcohol metabolic process	3	58	120	22870	9.86	0.00352	F1LN88 Q8VID1 Q9WVK3	GO_BP
Cluster2	primary metabolic process	50	58	10879	22870	1.81	8.95e-10	A2VCW9 B3DMA2 D3ZHR2 D3ZIQ1 D3ZLT1 D4A2K1 F1LN88 F1M7X5 G3V796 G3V7I0 G3V7J0 O55171 P04636 P07756 P07896 P08461 P10888 P11915 P12075 P13803 P14604 P15650 P18163 P19511 P21571 P27615 P28492 P29266 P63039 P85834 P97519 P97532 P97852 Q2M2R8 Q4FZT0 Q5I0P2 Q5XIC0 Q5XIH3 Q64057 Q642G4 Q64565 Q64602 Q6AYQ8 Q6P2A5 Q8VID1 Q9ER34 Q9WVK3 Q9WVK7 Q9Z2M4 Q9Z311	GO_BP
Cluster2	progesterone biosynthetic process	1	58	7	22870	56.33	0.0176	P11915	GO_BP
Cluster2	progesterone metabolic process	1	58	38	22870	10.38	0.0921	P11915	GO_BP
Cluster2	programmed cell death	3	58	1258	22870	0.94	0.625	G3V7I0 P07895 P63039	GO_BP
Cluster2	protein acetylation	2	58	198	22870	3.98	0.09	P04636 P07896	GO_BP
Cluster2	protein acylation	2	58	244	22870	3.23	0.127	P04636 P07896	GO_BP
Cluster2	protein folding	2	58	253	22870	3.12	0.135	P26772 P63039	GO_BP
Cluster2	protein homooligomerization	5	58	531	22870	3.71	0.011	G3V796 P07895 P15650 Q642G4 Q6P2A5	GO_BP
Cluster2	protein homotetramerization	3	58	151	22870	7.83	0.00668	G3V796 P07895 P15650	GO_BP
Cluster2	protein import	4	58	236	22870	6.68	0.00303	P63039 P97576 Q2M2R8 Q642G4	GO_BP
Cluster2	protein import into mitochondrial matrix	1	58	22	22870	17.92	0.0544	P97576	GO_BP
Cluster2	protein import into peroxisome matrix	2	58	19	22870	41.51	0.00105	Q2M2R8 Q642G4	GO_BP
Cluster2	protein import into peroxisome matrix, docking	2	58	9	22870	87.62	0.000225	Q2M2R8 Q642G4	GO_BP
Cluster2	protein import into peroxisome membrane	1	58	13	22870	30.33	0.0325	Q2M2R8	GO_BP
Cluster2	protein lipoylation	1	58	10	22870	39.43	0.0251	Q5I0P2	GO_BP
Cluster2	protein localization	14	58	2654	22870	2.08	0.00561	D3ZIQ1 O55171 P07896 P11915 P27615 P63039 P97519 P97576 Q2M2R8 Q5XIC0 Q642G4 Q8VID1 Q9WVK3 Q9Z2M4	GO_BP
Cluster2	protein localization to cell periphery	1	58	337	22870	1.17	0.578	P11915	GO_BP
Cluster2	protein localization to lysosome	1	58	51	22870	7.73	0.122	P27615	GO_BP
Cluster2	protein localization to membrane	2	58	687	22870	1.15	0.524	P11915 Q2M2R8	GO_BP
Cluster2	protein localization to mitochondrion	2	58	117	22870	6.74	0.0356	P63039 P97576	GO_BP
Cluster2	protein localization to organelle	13	58	958	22870	5.35	6.17e-07	D3ZIQ1 O55171 P07896 P27615 P63039 P97519 P97576 Q2M2R8 Q5XIC0 Q642G4 Q8VID1 Q9WVK3 Q9Z2M4	GO_BP
Cluster2	protein localization to peroxisome	10	58	95	22870	41.51	4.16e-14	D3ZIQ1 O55171 P07896 P97519 Q2M2R8 Q5XIC0 Q642G4 Q8VID1 Q9WVK3 Q9Z2M4	GO_BP
Cluster2	protein localization to plasma membrane	1	58	287	22870	1.37	0.52	P11915	GO_BP
Cluster2	protein localization to vacuole	1	58	71	22870	5.55	0.165	P27615	GO_BP
Cluster2	protein maturation	2	58	334	22870	2.36	0.208	Q4FZT0 Q5I0P2	GO_BP
Cluster2	protein metabolic process	10	58	5973	22870	0.66	0.96	F1M7X5 G3V7I0 P04636 P07756 P07896 P85834 Q2M2R8 Q4FZT0 Q5I0P2 Q642G4	GO_BP
Cluster2	protein modification by small protein conjugation	2	58	771	22870	1.02	0.587	Q2M2R8 Q642G4	GO_BP
Cluster2	protein modification process	6	58	4163	22870	0.57	0.966	G3V7I0 P04636 P07896 Q2M2R8 Q5I0P2 Q642G4	GO_BP
Cluster2	protein oligomerization	10	58	900	22870	4.38	7.95e-05	A2VCW9 G3V796 P07895 P15650 P97519 Q2M2R8 Q4FZT0 Q642G4 Q6P2A5 Q8VID1	GO_BP
Cluster2	protein oxidation	1	58	16	22870	24.64	0.0398	G3V7I0	GO_BP
Cluster2	protein processing	1	58	267	22870	1.48	0.494	Q4FZT0	GO_BP
Cluster2	protein refolding	1	58	20	22870	19.72	0.0495	P63039	GO_BP
Cluster2	protein stabilization	1	58	306	22870	1.29	0.543	P63039	GO_BP
Cluster2	protein targeting	13	58	436	22870	11.76	5.33e-11	D3ZIQ1 O55171 P07896 P27615 P63039 P97519 P97576 Q2M2R8 Q5XIC0 Q642G4 Q8VID1 Q9WVK3 Q9Z2M4	GO_BP
Cluster2	protein targeting to lysosome	1	58	38	22870	10.38	0.0921	P27615	GO_BP
Cluster2	protein targeting to membrane	1	58	160	22870	2.46	0.335	Q2M2R8	GO_BP
Cluster2	protein targeting to mitochondrion	2	58	86	22870	9.17	0.0202	P63039 P97576	GO_BP
Cluster2	protein targeting to peroxisome	10	58	95	22870	41.51	4.16e-14	D3ZIQ1 O55171 P07896 P97519 Q2M2R8 Q5XIC0 Q642G4 Q8VID1 Q9WVK3 Q9Z2M4	GO_BP
Cluster2	protein targeting to vacuole	1	58	48	22870	8.21	0.115	P27615	GO_BP
Cluster2	protein tetramerization	7	58	263	22870	10.49	4.48e-06	A2VCW9 G3V796 P07895 P15650 P97519 Q2M2R8 Q8VID1	GO_BP
Cluster2	protein transmembrane transport	4	58	87	22870	18.13	7.09e-05	P63039 P97576 Q2M2R8 Q642G4	GO_BP
Cluster2	protein transport	13	58	1530	22870	3.35	9.45e-05	D3ZIQ1 O55171 P07896 P27615 P63039 P97519 P97576 Q2M2R8 Q5XIC0 Q642G4 Q8VID1 Q9WVK3 Q9Z2M4	GO_BP
Cluster2	protein ubiquitination	2	58	713	22870	1.11	0.544	Q2M2R8 Q642G4	GO_BP
Cluster2	protein-cofactor linkage	1	58	15	22870	26.29	0.0374	Q5I0P2	GO_BP
Cluster2	proteolysis	3	58	1617	22870	0.73	0.787	F1M7X5 P07756 Q4FZT0	GO_BP
Cluster2	psychomotor behavior	1	58	7	22870	56.33	0.0176	F1M7X5	GO_BP
Cluster2	purine deoxyribonucleotide metabolic process	1	58	23	22870	17.14	0.0568	Q6P2A5	GO_BP
Cluster2	purine nucleoside bisphosphate metabolic process	8	58	216	22870	14.6	7.11e-08	D3ZIQ1 O55171 P07896 P08461 P11915 P18163 P97519 P97852	GO_BP
Cluster2	purine nucleoside diphosphate biosynthetic process	1	58	9	22870	43.81	0.0226	Q6P2A5	GO_BP
Cluster2	purine nucleoside diphosphate metabolic process	1	58	143	22870	2.76	0.305	Q6P2A5	GO_BP
Cluster2	purine nucleoside metabolic process	1	58	138	22870	2.86	0.296	Q6P2A5	GO_BP
Cluster2	purine nucleoside monophosphate metabolic process	8	58	389	22870	8.11	5.95e-06	D3ZLT1 P10888 P12075 P19511 P21571 Q4FZT0 Q5XIH3 Q6P2A5	GO_BP
Cluster2	purine nucleoside triphosphate metabolic process	8	58	367	22870	8.6	3.88e-06	D3ZLT1 P10888 P12075 P19511 P21571 Q4FZT0 Q5XIH3 Q6P2A5	GO_BP
Cluster2	purine nucleotide biosynthetic process	7	58	335	22870	8.24	2.15e-05	P08461 P12075 P18163 P19511 P21571 Q4FZT0 Q6P2A5	GO_BP
Cluster2	purine nucleotide metabolic process	16	58	740	22870	8.53	2.77e-11	D3ZIQ1 D3ZLT1 O55171 P07896 P08461 P10888 P11915 P12075 P18163 P19511 P21571 P97519 P97852 Q4FZT0 Q5XIH3 Q6P2A5	GO_BP
Cluster2	purine ribonucleoside metabolic process	1	58	133	22870	2.96	0.287	Q6P2A5	GO_BP
Cluster2	purine ribonucleotide biosynthetic process	7	58	321	22870	8.6	1.64e-05	P08461 P12075 P18163 P19511 P21571 Q4FZT0 Q6P2A5	GO_BP
Cluster2	purine ribonucleotide metabolic process	16	58	710	22870	8.89	1.5e-11	D3ZIQ1 D3ZLT1 O55171 P07896 P08461 P10888 P11915 P12075 P18163 P19511 P21571 P97519 P97852 Q4FZT0 Q5XIH3 Q6P2A5	GO_BP
Cluster2	purine-containing compound biosynthetic process	7	58	348	22870	7.93	2.75e-05	P08461 P12075 P18163 P19511 P21571 Q4FZT0 Q6P2A5	GO_BP
Cluster2	purine-containing compound metabolic process	16	58	819	22870	7.7	1.24e-10	D3ZIQ1 D3ZLT1 O55171 P07896 P08461 P10888 P11915 P12075 P18163 P19511 P21571 P97519 P97852 Q4FZT0 Q5XIH3 Q6P2A5	GO_BP
Cluster2	pyridine nucleotide metabolic process	2	58	230	22870	3.43	0.116	P04636 P08461	GO_BP
Cluster2	pyridine-containing compound metabolic process	2	58	247	22870	3.19	0.13	P04636 P08461	GO_BP
Cluster2	pyrimidine nucleobase catabolic process	1	58	7	22870	56.33	0.0176	G3V7J0	GO_BP
Cluster2	pyrimidine nucleobase metabolic process	1	58	24	22870	16.43	0.0592	G3V7J0	GO_BP
Cluster2	pyrimidine nucleoside metabolic process	1	58	51	22870	7.73	0.122	Q6P2A5	GO_BP
Cluster2	pyrimidine nucleotide metabolic process	1	58	51	22870	7.73	0.122	Q6P2A5	GO_BP
Cluster2	pyrimidine ribonucleoside metabolic process	1	58	29	22870	13.6	0.071	Q6P2A5	GO_BP
Cluster2	pyrimidine ribonucleotide metabolic process	1	58	19	22870	20.75	0.0471	Q6P2A5	GO_BP
Cluster2	pyrimidine-containing compound catabolic process	1	58	41	22870	9.62	0.099	G3V7J0	GO_BP
Cluster2	pyrimidine-containing compound metabolic process	2	58	99	22870	7.97	0.0262	G3V7J0 Q6P2A5	GO_BP
Cluster2	pyruvate biosynthetic process	1	58	100	22870	3.94	0.225	D4A2K1	GO_BP
Cluster2	pyruvate family amino acid catabolic process	1	58	5	22870	78.86	0.0126	Q64565	GO_BP
Cluster2	pyruvate family amino acid metabolic process	1	58	7	22870	56.33	0.0176	Q64565	GO_BP
Cluster2	pyruvate metabolic process	2	58	147	22870	5.36	0.0537	D4A2K1 P08461	GO_BP
Cluster2	reactive nitrogen species metabolic process	3	58	38	22870	31.13	0.000123	D3Z900 G3V6I4 P07756	GO_BP
Cluster2	reactive oxygen species biosynthetic process	1	58	45	22870	8.76	0.108	P07895	GO_BP
Cluster2	reactive oxygen species metabolic process	4	58	164	22870	9.62	0.0008	G3V7I0 P07756 P07895 P28492	GO_BP
Cluster2	receptor-mediated endocytosis	1	58	320	22870	1.23	0.559	P27615	GO_BP
Cluster2	regulated exocytosis	1	58	1053	22870	0.37	0.935	Q6AY30	GO_BP
Cluster2	regulation of ATPase activity	1	58	140	22870	2.82	0.3	P97576	GO_BP
Cluster2	regulation of DNA metabolic process	1	58	646	22870	0.61	0.811	Q4FZT0	GO_BP
Cluster2	regulation of DNA replication	1	58	169	22870	2.33	0.35	Q4FZT0	GO_BP
Cluster2	regulation of DNA-dependent DNA replication	1	58	71	22870	5.55	0.165	Q4FZT0	GO_BP
Cluster2	regulation of RNA biosynthetic process	3	58	4587	22870	0.26	1	G3V7I0 P07895 Q642G4	GO_BP
Cluster2	regulation of RNA metabolic process	3	58	4924	22870	0.24	1	G3V7I0 P07895 Q642G4	GO_BP
Cluster2	regulation of T cell activation	2	58	559	22870	1.41	0.416	F1M7X5 P63039	GO_BP
Cluster2	regulation of T cell mediated immunity	2	58	180	22870	4.38	0.0765	F1M7X5 P63039	GO_BP
Cluster2	regulation of adaptive immune response	2	58	344	22870	2.29	0.217	F1M7X5 P63039	GO_BP
Cluster2	regulation of alcohol biosynthetic process	1	58	128	22870	3.08	0.278	P11915	GO_BP
Cluster2	regulation of anatomical structure morphogenesis	1	58	1884	22870	0.21	0.993	Q5U4F4	GO_BP
Cluster2	regulation of anatomical structure size	2	58	889	22870	0.89	0.665	P07756 P07895	GO_BP
Cluster2	regulation of apoptotic process	6	58	2687	22870	0.88	0.691	F1LN88 G3V7I0 P07895 P11915 P28492 P63039	GO_BP
Cluster2	regulation of apoptotic process in bone marrow	1	58	8	22870	49.29	0.0201	P63039	GO_BP
Cluster2	regulation of apoptotic signaling pathway	1	58	736	22870	0.54	0.85	P07895	GO_BP
Cluster2	regulation of binding	1	58	661	22870	0.6	0.818	Q642G4	GO_BP
Cluster2	regulation of biological process	17	58	15881	22870	0.42	1	F1LN88 F1M7X5 G3V796 G3V7I0 P07895 P11915 P15650 P18163 P27615 P28492 P63039 Q2M2R8 Q4FZT0 Q5U4F4 Q642G4 Q64565 Q9WVK7	GO_BP
Cluster2	regulation of biological quality	18	58	6318	22870	1.12	0.326	F1M7X5 G3V7I0 G3V7J0 P07756 P07895 P11915 P15650 P27615 P63039 P97852 Q4FZT0 Q5I0P2 Q5U4F4 Q64057 Q64565 Q6P2A5 Q8VID1 Q9WVK7	GO_BP
Cluster2	regulation of biosynthetic process	9	58	5775	22870	0.61	0.974	G3V796 G3V7I0 P07895 P11915 P15650 P63039 Q4FZT0 Q642G4 Q64565	GO_BP
Cluster2	regulation of blood pressure	1	58	366	22870	1.08	0.608	P07895	GO_BP
Cluster2	regulation of blood vessel diameter	2	58	292	22870	2.7	0.169	P07756 P07895	GO_BP
Cluster2	regulation of blood vessel size	2	58	299	22870	2.64	0.176	P07756 P07895	GO_BP
Cluster2	regulation of body fluid levels	1	58	868	22870	0.45	0.894	Q6P2A5	GO_BP
Cluster2	regulation of carbohydrate biosynthetic process	1	58	188	22870	2.1	0.381	G3V796	GO_BP
Cluster2	regulation of carbohydrate metabolic process	1	58	335	22870	1.18	0.576	G3V796	GO_BP
Cluster2	regulation of cardiolipin metabolic process	1	58	1	22870	394.31	0.00254	Q4FZT0	GO_BP
Cluster2	regulation of catalytic activity	6	58	3616	22870	0.65	0.914	G3V7I0 P07895 P18163 P27615 P63039 P97576	GO_BP
Cluster2	regulation of cell activation	2	58	960	22870	0.82	0.706	F1M7X5 P63039	GO_BP
Cluster2	regulation of cell adhesion	2	58	1168	22870	0.68	0.803	F1M7X5 P63039	GO_BP
Cluster2	regulation of cell adhesion mediated by integrin	1	58	68	22870	5.8	0.159	F1M7X5	GO_BP
Cluster2	regulation of cell communication	4	58	5314	22870	0.3	1	F1M7X5 P07895 P27615 Q9WVK7	GO_BP
Cluster2	regulation of cell death	6	58	3005	22870	0.79	0.791	F1LN88 G3V7I0 P07895 P11915 P28492 P63039	GO_BP
Cluster2	regulation of cell development	1	58	1814	22870	0.22	0.992	P27615	GO_BP
Cluster2	regulation of cell differentiation	2	58	3200	22870	0.25	0.998	P07895 P27615	GO_BP
Cluster2	regulation of cell migration	1	58	1440	22870	0.27	0.977	P07895	GO_BP
Cluster2	regulation of cell motility	1	58	1533	22870	0.26	0.982	P07895	GO_BP
Cluster2	regulation of cell projection organization	1	58	1324	22870	0.3	0.969	P27615	GO_BP
Cluster2	regulation of cell proliferation	3	58	2874	22870	0.41	0.982	F1M7X5 G3V7I0 P07895	GO_BP
Cluster2	regulation of cell-cell adhesion	2	58	673	22870	1.17	0.512	F1M7X5 P63039	GO_BP
Cluster2	regulation of cellular biosynthetic process	6	58	5638	22870	0.42	0.998	G3V7I0 P07895 P15650 Q4FZT0 Q642G4 Q64565	GO_BP
Cluster2	regulation of cellular component biogenesis	2	58	1534	22870	0.51	0.908	Q2M2R8 Q642G4	GO_BP
Cluster2	regulation of cellular component movement	1	58	1696	22870	0.23	0.989	P07895	GO_BP
Cluster2	regulation of cellular component organization	6	58	4154	22870	0.57	0.965	F1M7X5 P27615 Q2M2R8 Q4FZT0 Q5U4F4 Q642G4	GO_BP
Cluster2	regulation of cellular ketone metabolic process	1	58	287	22870	1.37	0.52	P15650	GO_BP
Cluster2	regulation of cellular localization	1	58	1568	22870	0.25	0.984	P11915	GO_BP
Cluster2	regulation of cellular metabolic process	9	58	8528	22870	0.42	1	G3V796 G3V7I0 P07895 P15650 P18163 P63039 Q4FZT0 Q642G4 Q64565	GO_BP
Cluster2	regulation of cellular process	17	58	15001	22870	0.45	1	F1LN88 F1M7X5 G3V796 G3V7I0 P07895 P11915 P15650 P18163 P27615 P28492 P63039 Q2M2R8 Q4FZT0 Q5U4F4 Q642G4 Q64565 Q9WVK7	GO_BP
Cluster2	regulation of cellular protein metabolic process	3	58	4057	22870	0.29	0.999	G3V7I0 P18163 P63039	GO_BP
Cluster2	regulation of cellular response to stress	1	58	1069	22870	0.37	0.938	P07895	GO_BP
Cluster2	regulation of cholesterol biosynthetic process	1	58	76	22870	5.19	0.176	P11915	GO_BP
Cluster2	regulation of cholesterol import	1	58	9	22870	43.81	0.0226	P11915	GO_BP
Cluster2	regulation of cholesterol metabolic process	2	58	96	22870	8.21	0.0248	P11915 P15650	GO_BP
Cluster2	regulation of cholesterol transport	1	58	79	22870	4.99	0.182	P11915	GO_BP
Cluster2	regulation of cysteine-type endopeptidase activity	2	58	425	22870	1.86	0.293	G3V7I0 P63039	GO_BP
Cluster2	regulation of cytokine production	1	58	1170	22870	0.34	0.953	P63039	GO_BP
Cluster2	regulation of cytokine secretion	1	58	364	22870	1.08	0.606	P63039	GO_BP
Cluster2	regulation of defense response	1	58	1170	22870	0.34	0.953	P63039	GO_BP
Cluster2	regulation of developmental growth	1	58	699	22870	0.56	0.835	Q2M2R8	GO_BP
Cluster2	regulation of developmental process	4	58	4368	22870	0.36	0.998	P07895 P27615 Q2M2R8 Q5U4F4	GO_BP
Cluster2	regulation of endopeptidase activity	2	58	668	22870	1.18	0.508	G3V7I0 P63039	GO_BP
Cluster2	regulation of endosome organization	1	58	12	22870	32.86	0.03	P27615	GO_BP
Cluster2	regulation of extracellular matrix disassembly	1	58	39	22870	10.11	0.0944	F1M7X5	GO_BP
Cluster2	regulation of extracellular matrix organization	1	58	76	22870	5.19	0.176	F1M7X5	GO_BP
Cluster2	regulation of fat cell differentiation	1	58	200	22870	1.97	0.4	P07895	GO_BP
Cluster2	regulation of fatty acid biosynthetic process	1	58	136	22870	2.9	0.293	P15650	GO_BP
Cluster2	regulation of fatty acid metabolic process	1	58	217	22870	1.82	0.425	P15650	GO_BP
Cluster2	regulation of fatty acid oxidation	1	58	50	22870	7.89	0.119	P15650	GO_BP
Cluster2	regulation of fibroblast proliferation	1	58	193	22870	2.04	0.389	P07895	GO_BP
Cluster2	regulation of gene expression	4	58	6023	22870	0.26	1	G3V7I0 P07895 Q5U4F4 Q642G4	GO_BP
Cluster2	regulation of gluconeogenesis	1	58	95	22870	4.15	0.215	G3V796	GO_BP
Cluster2	regulation of glucose metabolic process	1	58	216	22870	1.83	0.424	G3V796	GO_BP
Cluster2	regulation of glucosylceramidase activity	1	58	3	22870	131.44	0.00759	P27615	GO_BP
Cluster2	regulation of growth	1	58	1244	22870	0.32	0.961	Q2M2R8	GO_BP
Cluster2	regulation of hormone levels	5	58	1139	22870	1.73	0.161	F1M7X5 P11915 P97852 Q8VID1 Q9WVK7	GO_BP
Cluster2	regulation of hormone secretion	2	58	646	22870	1.22	0.491	F1M7X5 Q9WVK7	GO_BP
Cluster2	regulation of hydrolase activity	4	58	1948	22870	0.81	0.739	G3V7I0 P27615 P63039 P97576	GO_BP
Cluster2	regulation of immune effector process	2	58	705	22870	1.12	0.538	F1M7X5 P63039	GO_BP
Cluster2	regulation of immune response	3	58	1463	22870	0.81	0.726	F1M7X5 P63039 Q4FZT0	GO_BP
Cluster2	regulation of immune response to tumor cell	1	58	56	22870	7.04	0.133	P63039	GO_BP
Cluster2	regulation of immune system process	3	58	2296	22870	0.52	0.94	F1M7X5 P63039 Q4FZT0	GO_BP
Cluster2	regulation of inflammatory response	1	58	631	22870	0.62	0.803	P63039	GO_BP
Cluster2	regulation of innate immune response	1	58	575	22870	0.69	0.772	P63039	GO_BP
Cluster2	regulation of insulin secretion	2	58	384	22870	2.05	0.255	F1M7X5 Q9WVK7	GO_BP
Cluster2	regulation of interferon-alpha production	1	58	39	22870	10.11	0.0944	P63039	GO_BP
Cluster2	regulation of interferon-gamma production	1	58	164	22870	2.4	0.342	P63039	GO_BP
Cluster2	regulation of interleukin-10 production	1	58	85	22870	4.64	0.194	P63039	GO_BP
Cluster2	regulation of interleukin-12 production	1	58	101	22870	3.9	0.227	P63039	GO_BP
Cluster2	regulation of interleukin-6 production	1	58	222	22870	1.78	0.432	P63039	GO_BP
Cluster2	regulation of intracellular cholesterol transport	1	58	10	22870	39.43	0.0251	P11915	GO_BP
Cluster2	regulation of intracellular lipid transport	1	58	10	22870	39.43	0.0251	P11915	GO_BP
Cluster2	regulation of intracellular signal transduction	1	58	2888	22870	0.14	1	P07895	GO_BP
Cluster2	regulation of intracellular sterol transport	1	58	10	22870	39.43	0.0251	P11915	GO_BP
Cluster2	regulation of intracellular transport	1	58	667	22870	0.59	0.821	P11915	GO_BP
Cluster2	regulation of kinase activity	2	58	1453	22870	0.54	0.891	G3V7I0 P18163	GO_BP
Cluster2	regulation of leukocyte activation	2	58	882	22870	0.89	0.66	F1M7X5 P63039	GO_BP
Cluster2	regulation of leukocyte cell-cell adhesion	2	58	504	22870	1.56	0.367	F1M7X5 P63039	GO_BP
Cluster2	regulation of leukocyte mediated immunity	2	58	419	22870	1.88	0.287	F1M7X5 P63039	GO_BP
Cluster2	regulation of lipid biosynthetic process	2	58	429	22870	1.84	0.297	P11915 P15650	GO_BP
Cluster2	regulation of lipid metabolic process	5	58	805	22870	2.45	0.0529	G3V796 P11915 P15650 P18163 Q4FZT0	GO_BP
Cluster2	regulation of lipid storage	1	58	91	22870	4.33	0.207	Q5U4F4	GO_BP
Cluster2	regulation of lipid transport	1	58	232	22870	1.7	0.447	P11915	GO_BP
Cluster2	regulation of localization	6	58	4630	22870	0.51	0.986	F1M7X5 P07895 P11915 P63039 Q5U4F4 Q9WVK7	GO_BP
Cluster2	regulation of locomotion	1	58	1652	22870	0.24	0.987	P07895	GO_BP
Cluster2	regulation of lymphocyte activation	2	58	736	22870	1.07	0.561	F1M7X5 P63039	GO_BP
Cluster2	regulation of lymphocyte mediated immunity	2	58	332	22870	2.38	0.206	F1M7X5 P63039	GO_BP
Cluster2	regulation of lysosome organization	1	58	3	22870	131.44	0.00759	P27615	GO_BP
Cluster2	regulation of macromolecule biosynthetic process	4	58	5359	22870	0.29	1	G3V7I0 P07895 Q4FZT0 Q642G4	GO_BP
Cluster2	regulation of macromolecule metabolic process	7	58	8454	22870	0.33	1	G3V7I0 P07895 P18163 P63039 Q4FZT0 Q5U4F4 Q642G4	GO_BP
Cluster2	regulation of macrophage activation	1	58	93	22870	4.24	0.211	P63039	GO_BP
Cluster2	regulation of membrane potential	5	58	793	22870	2.49	0.0502	G3V7I0 P07895 P27615 Q4FZT0 Q5U4F4	GO_BP
Cluster2	regulation of metabolic process	11	58	9230	22870	0.47	1	G3V796 G3V7I0 P07895 P11915 P15650 P18163 P63039 Q4FZT0 Q5U4F4 Q642G4 Q64565	GO_BP
Cluster2	regulation of mitochondrial DNA metabolic process	1	58	9	22870	43.81	0.0226	Q4FZT0	GO_BP
Cluster2	regulation of mitochondrial DNA replication	1	58	4	22870	98.58	0.0101	Q4FZT0	GO_BP
Cluster2	regulation of mitochondrial fission	1	58	46	22870	8.57	0.11	Q5U4F4	GO_BP
Cluster2	regulation of mitochondrial membrane potential	4	58	125	22870	12.62	0.000287	G3V7I0 P07895 Q4FZT0 Q5U4F4	GO_BP
Cluster2	regulation of mitochondrion organization	2	58	287	22870	2.75	0.165	Q4FZT0 Q5U4F4	GO_BP
Cluster2	regulation of molecular function	7	58	5189	22870	0.53	0.987	G3V7I0 P07895 P18163 P27615 P63039 P97576 Q642G4	GO_BP
Cluster2	regulation of multi-organism process	1	58	755	22870	0.52	0.858	P27615	GO_BP
Cluster2	regulation of multicellular organism growth	1	58	189	22870	2.09	0.382	Q2M2R8	GO_BP
Cluster2	regulation of multicellular organismal development	2	58	3549	22870	0.22	0.999	P07895 P27615	GO_BP
Cluster2	regulation of multicellular organismal process	4	58	5190	22870	0.3	1	P07895 P27615 P63039 Q2M2R8	GO_BP
Cluster2	regulation of muscle cell apoptotic process	1	58	167	22870	2.36	0.347	P07895	GO_BP
Cluster2	regulation of muscle cell differentiation	1	58	286	22870	1.38	0.518	P07895	GO_BP
Cluster2	regulation of nervous system development	1	58	1699	22870	0.23	0.989	P27615	GO_BP
Cluster2	regulation of neurogenesis	1	58	1546	22870	0.26	0.983	P27615	GO_BP
Cluster2	regulation of neuron apoptotic process	3	58	451	22870	2.62	0.107	G3V7I0 P07895 P63039	GO_BP
Cluster2	regulation of neuron death	3	58	638	22870	1.85	0.22	G3V7I0 P07895 P63039	GO_BP
Cluster2	regulation of neuron differentiation	1	58	1305	22870	0.3	0.967	P27615	GO_BP
Cluster2	regulation of neuron projection development	1	58	1038	22870	0.38	0.933	P27615	GO_BP
Cluster2	regulation of neurotransmitter levels	6	58	654	22870	3.62	0.00613	G3V7J0 P07756 P07895 Q5I0P2 Q64057 Q64565	GO_BP
Cluster2	regulation of nitric oxide biosynthetic process	2	58	164	22870	4.81	0.0651	P07895 Q64565	GO_BP
Cluster2	regulation of nitrogen compound metabolic process	7	58	8051	22870	0.34	1	G3V7I0 P07895 P18163 P63039 Q4FZT0 Q642G4 Q64565	GO_BP
Cluster2	regulation of nucleic acid-templated transcription	3	58	4576	22870	0.26	1	G3V7I0 P07895 Q642G4	GO_BP
Cluster2	regulation of organelle organization	3	58	1963	22870	0.6	0.885	P27615 Q4FZT0 Q5U4F4	GO_BP
Cluster2	regulation of oxidative stress-induced cell death	1	58	166	22870	2.38	0.345	P07895	GO_BP
Cluster2	regulation of peptidase activity	2	58	717	22870	1.1	0.547	G3V7I0 P63039	GO_BP
Cluster2	regulation of peptide hormone secretion	2	58	516	22870	1.53	0.378	F1M7X5 Q9WVK7	GO_BP
Cluster2	regulation of peptide secretion	3	58	1026	22870	1.15	0.486	F1M7X5 P63039 Q9WVK7	GO_BP
Cluster2	regulation of peptide transport	3	58	1409	22870	0.84	0.702	F1M7X5 P63039 Q9WVK7	GO_BP
Cluster2	regulation of phenotypic switching	1	58	11	22870	35.85	0.0276	P07895	GO_BP
Cluster2	regulation of phosphate metabolic process	3	58	2877	22870	0.41	0.982	G3V7I0 P18163 Q4FZT0	GO_BP
Cluster2	regulation of phospholipid metabolic process	1	58	154	22870	2.56	0.325	Q4FZT0	GO_BP
Cluster2	regulation of phosphorus metabolic process	3	58	2878	22870	0.41	0.982	G3V7I0 P18163 Q4FZT0	GO_BP
Cluster2	regulation of phosphorylation	2	58	2546	22870	0.31	0.991	G3V7I0 P18163	GO_BP
Cluster2	regulation of primary metabolic process	9	58	8360	22870	0.42	1	G3V796 G3V7I0 P07895 P11915 P15650 P18163 P63039 Q4FZT0 Q642G4	GO_BP
Cluster2	regulation of programmed cell death	6	58	2738	22870	0.86	0.709	F1LN88 G3V7I0 P07895 P11915 P28492 P63039	GO_BP
Cluster2	regulation of protein binding	1	58	415	22870	0.95	0.655	Q642G4	GO_BP
Cluster2	regulation of protein complex assembly	2	58	726	22870	1.09	0.554	Q2M2R8 Q642G4	GO_BP
Cluster2	regulation of protein homooligomerization	2	58	33	22870	23.9	0.00317	Q2M2R8 Q642G4	GO_BP
Cluster2	regulation of protein homotetramerization	2	58	6	22870	131.44	9.42e-05	Q2M2R8 Q642G4	GO_BP
Cluster2	regulation of protein kinase activity	1	58	1303	22870	0.3	0.967	P18163	GO_BP
Cluster2	regulation of protein localization	3	58	1836	22870	0.64	0.855	F1M7X5 P63039 Q9WVK7	GO_BP
Cluster2	regulation of protein metabolic process	3	58	4370	22870	0.27	1	G3V7I0 P18163 P63039	GO_BP
Cluster2	regulation of protein modification process	1	58	2939	22870	0.13	1	P18163	GO_BP
Cluster2	regulation of protein oligomerization	2	58	64	22870	12.32	0.0115	Q2M2R8 Q642G4	GO_BP
Cluster2	regulation of protein phosphorylation	1	58	2338	22870	0.17	0.998	P18163	GO_BP
Cluster2	regulation of protein secretion	3	58	901	22870	1.31	0.402	F1M7X5 P63039 Q9WVK7	GO_BP
Cluster2	regulation of protein stability	1	58	448	22870	0.88	0.683	P63039	GO_BP
Cluster2	regulation of protein tetramerization	2	58	6	22870	131.44	9.42e-05	Q2M2R8 Q642G4	GO_BP
Cluster2	regulation of protein transport	3	58	1283	22870	0.92	0.639	F1M7X5 P63039 Q9WVK7	GO_BP
Cluster2	regulation of proteolysis	2	58	1246	22870	0.63	0.832	G3V7I0 P63039	GO_BP
Cluster2	regulation of response to biotic stimulus	2	58	264	22870	2.99	0.144	P27615 P63039	GO_BP
Cluster2	regulation of response to external stimulus	2	58	1297	22870	0.61	0.849	P27615 P63039	GO_BP
Cluster2	regulation of response to oxidative stress	1	58	196	22870	2.01	0.393	P07895	GO_BP
Cluster2	regulation of response to stimulus	5	58	6136	22870	0.32	1	F1M7X5 P07895 P27615 P63039 Q4FZT0	GO_BP
Cluster2	regulation of response to stress	2	58	2241	22870	0.35	0.982	P07895 P63039	GO_BP
Cluster2	regulation of response to tumor cell	1	58	56	22870	7.04	0.133	P63039	GO_BP
Cluster2	regulation of secretion	3	58	1659	22870	0.71	0.802	F1M7X5 P63039 Q9WVK7	GO_BP
Cluster2	regulation of secretion by cell	3	58	1546	22870	0.77	0.761	F1M7X5 P63039 Q9WVK7	GO_BP
Cluster2	regulation of signal transduction	2	58	4695	22870	0.17	1	P07895 P27615	GO_BP
Cluster2	regulation of signaling	4	58	5357	22870	0.29	1	F1M7X5 P07895 P27615 Q9WVK7	GO_BP
Cluster2	regulation of smooth muscle cell apoptotic process	1	58	45	22870	8.76	0.108	P07895	GO_BP
Cluster2	regulation of smooth muscle cell differentiation	1	58	59	22870	6.68	0.139	P07895	GO_BP
Cluster2	regulation of smooth muscle cell proliferation	1	58	295	22870	1.34	0.529	P07895	GO_BP
Cluster2	regulation of steroid biosynthetic process	1	58	222	22870	1.78	0.432	P11915	GO_BP
Cluster2	regulation of steroid metabolic process	2	58	275	22870	2.87	0.154	P11915 P15650	GO_BP
Cluster2	regulation of sterol import	1	58	9	22870	43.81	0.0226	P11915	GO_BP
Cluster2	regulation of sterol transport	1	58	79	22870	4.99	0.182	P11915	GO_BP
Cluster2	regulation of systemic arterial blood pressure	1	58	211	22870	1.87	0.416	P07895	GO_BP
Cluster2	regulation of transcription, DNA-templated	3	58	4504	22870	0.26	1	G3V7I0 P07895 Q642G4	GO_BP
Cluster2	regulation of transferase activity	2	58	1604	22870	0.49	0.921	G3V7I0 P18163	GO_BP
Cluster2	regulation of transport	4	58	3340	22870	0.47	0.978	F1M7X5 P11915 P63039 Q9WVK7	GO_BP
Cluster2	regulation of tube diameter	2	58	292	22870	2.7	0.169	P07756 P07895	GO_BP
Cluster2	regulation of tube size	2	58	301	22870	2.62	0.177	P07756 P07895	GO_BP
Cluster2	regulation of tumor necrosis factor production	1	58	248	22870	1.59	0.469	P63039	GO_BP
Cluster2	regulation of tumor necrosis factor secretion	1	58	54	22870	7.3	0.128	P63039	GO_BP
Cluster2	regulation of type I interferon production	1	58	154	22870	2.56	0.325	P63039	GO_BP
Cluster2	regulation of vacuole organization	1	58	74	22870	5.33	0.172	P27615	GO_BP
Cluster2	regulation of vasculature development	1	58	639	22870	0.62	0.807	P07895	GO_BP
Cluster2	release of cytochrome c from mitochondria	1	58	39	22870	10.11	0.0944	P07895	GO_BP
Cluster2	removal of superoxide radicals	1	58	19	22870	20.75	0.0471	P07895	GO_BP
Cluster2	renal system development	1	58	525	22870	0.75	0.74	P97532	GO_BP
Cluster2	reproduction	2	58	2359	22870	0.33	0.986	G3V7I0 P97852	GO_BP
Cluster2	reproductive process	2	58	2357	22870	0.33	0.986	G3V7I0 P97852	GO_BP
Cluster2	reproductive structure development	2	58	840	22870	0.94	0.634	G3V7I0 P97852	GO_BP
Cluster2	reproductive system development	2	58	846	22870	0.93	0.638	G3V7I0 P97852	GO_BP
Cluster2	respiratory electron transport chain	5	58	135	22870	14.6	2.37e-05	D3ZLT1 P07895 P10888 P12075 Q5XIH3	GO_BP
Cluster2	response to ATP	1	58	75	22870	5.26	0.174	P63039	GO_BP
Cluster2	response to L-ascorbic acid	1	58	23	22870	17.14	0.0568	P07895	GO_BP
Cluster2	response to abiotic stimulus	8	58	2198	22870	1.44	0.19	F1LN88 F1M7X5 G3V796 O55171 P07895 P15650 P63039 Q5U4F4	GO_BP
Cluster2	response to acid chemical	5	58	901	22870	2.19	0.0777	F1LN88 P07756 P07895 P18163 P97519	GO_BP
Cluster2	response to activity	3	58	216	22870	5.48	0.0175	P07895 P63039 Q9WVK7	GO_BP
Cluster2	response to alcohol	3	58	695	22870	1.7	0.258	P07895 P11915 P85834	GO_BP
Cluster2	response to alkaloid	1	58	281	22870	1.4	0.512	P63039	GO_BP
Cluster2	response to amine	1	58	107	22870	3.69	0.238	P07756	GO_BP
Cluster2	response to amino acid	1	58	357	22870	1.1	0.599	P07756	GO_BP
Cluster2	response to ammonia	1	58	1	22870	394.31	0.00254	P07756	GO_BP
Cluster2	response to ammonium ion	1	58	314	22870	1.26	0.552	P63039	GO_BP
Cluster2	response to anesthetic	1	58	204	22870	1.93	0.406	P63039	GO_BP
Cluster2	response to antibiotic	4	58	876	22870	1.8	0.182	G3V7I0 P07895 P63039 P85834	GO_BP
Cluster2	response to antineoplastic agent	1	58	289	22870	1.36	0.522	P07756	GO_BP
Cluster2	response to axon injury	1	58	124	22870	3.18	0.271	P07895	GO_BP
Cluster2	response to bacterium	5	58	1179	22870	1.67	0.178	F1LN88 G3V7I0 P07756 P07895 P63039	GO_BP
Cluster2	response to biotic stimulus	5	58	1600	22870	1.23	0.383	F1LN88 G3V7I0 P07756 P07895 P63039	GO_BP
Cluster2	response to cAMP	1	58	274	22870	1.44	0.503	P07756	GO_BP
Cluster2	response to cadmium ion	1	58	124	22870	3.18	0.271	P07895	GO_BP
Cluster2	response to carbohydrate	1	58	472	22870	0.84	0.702	P07895	GO_BP
Cluster2	response to chemical	20	58	7348	22870	1.07	0.398	D3Z900 F1LN88 G3V6I4 G3V796 G3V7I0 O55171 P07756 P07895 P10888 P11915 P12075 P18163 P26772 P63039 P85834 P97519 P97532 P97852 Q5U4F4 Q9WVK7	GO_BP
Cluster2	response to cholesterol	1	58	45	22870	8.76	0.108	P11915	GO_BP
Cluster2	response to cocaine	1	58	116	22870	3.4	0.256	P63039	GO_BP
Cluster2	response to cold	5	58	111	22870	17.76	9.18e-06	G3V796 P07895 P15650 P63039 Q5U4F4	GO_BP
Cluster2	response to copper ion	1	58	82	22870	4.81	0.188	G3V796	GO_BP
Cluster2	response to corticosteroid	3	58	558	22870	2.12	0.168	G3V796 P07756 P63039	GO_BP
Cluster2	response to cytokine	2	58	1834	22870	0.43	0.953	P07895 P18163	GO_BP
Cluster2	response to decreased oxygen levels	4	58	750	22870	2.1	0.122	F1M7X5 O55171 P07895 P63039	GO_BP
Cluster2	response to dexamethasone	1	58	165	22870	2.39	0.343	P07756	GO_BP
Cluster2	response to drug	11	58	2266	22870	1.91	0.0255	F1LN88 G3V796 G3V7I0 O55171 P07756 P07895 P18163 P63039 P85834 P97852 Q9WVK7	GO_BP
Cluster2	response to electrical stimulus	1	58	126	22870	3.13	0.274	P07895	GO_BP
Cluster2	response to endogenous stimulus	10	58	2989	22870	1.32	0.221	F1LN88 G3V796 O55171 P07756 P11915 P12075 P18163 P63039 P97852 Q9WVK7	GO_BP
Cluster2	response to epidermal growth factor	1	58	97	22870	4.07	0.219	O55171	GO_BP
Cluster2	response to estradiol	2	58	477	22870	1.65	0.342	F1LN88 P11915	GO_BP
Cluster2	response to estrogen	1	58	183	22870	2.15	0.373	P63039	GO_BP
Cluster2	response to ethanol	2	58	431	22870	1.83	0.299	P07895 P85834	GO_BP
Cluster2	response to external biotic stimulus	5	58	1563	22870	1.26	0.364	F1LN88 G3V7I0 P07756 P07895 P63039	GO_BP
Cluster2	response to external stimulus	12	58	3479	22870	1.36	0.163	F1LN88 G3V796 G3V7I0 O55171 P07756 P07895 P10888 P18163 P63039 P97519 Q5U4F4 Q6P2A5	GO_BP
Cluster2	response to extracellular stimulus	10	58	1269	22870	3.11	0.00122	G3V796 O55171 P07756 P07895 P10888 P18163 P63039 P97519 Q5U4F4 Q6P2A5	GO_BP
Cluster2	response to fatty acid	4	58	207	22870	7.62	0.00189	F1LN88 P07756 P18163 P97519	GO_BP
Cluster2	response to fibroblast growth factor	1	58	166	22870	2.38	0.345	P07756	GO_BP
Cluster2	response to food	2	58	118	22870	6.68	0.0362	P07756 Q5U4F4	GO_BP
Cluster2	response to gamma radiation	1	58	107	22870	3.69	0.238	P07895	GO_BP
Cluster2	response to glucagon	1	58	58	22870	6.8	0.137	P07756	GO_BP
Cluster2	response to glucocorticoid	3	58	508	22870	2.33	0.138	G3V796 P07756 P63039	GO_BP
Cluster2	response to gonadotropin	1	58	142	22870	2.78	0.304	P11915	GO_BP
Cluster2	response to growth factor	2	58	943	22870	0.84	0.696	O55171 P07756	GO_BP
Cluster2	response to growth hormone	1	58	133	22870	2.96	0.287	P07756	GO_BP
Cluster2	response to heat	1	58	222	22870	1.78	0.432	P63039	GO_BP
Cluster2	response to hormone	10	58	2167	22870	1.82	0.0445	F1LN88 G3V796 O55171 P07756 P11915 P12075 P18163 P63039 P97852 Q9WVK7	GO_BP
Cluster2	response to hydrogen peroxide	3	58	256	22870	4.62	0.0272	G3V7I0 P07895 P63039	GO_BP
Cluster2	response to hyperoxia	2	58	86	22870	9.17	0.0202	F1LN88 P07895	GO_BP
Cluster2	response to hypoxia	4	58	726	22870	2.17	0.112	F1M7X5 O55171 P07895 P63039	GO_BP
Cluster2	response to immobilization stress	1	58	65	22870	6.07	0.152	P07895	GO_BP
Cluster2	response to increased oxygen levels	2	58	98	22870	8.05	0.0257	F1LN88 P07895	GO_BP
Cluster2	response to inorganic substance	5	58	1229	22870	1.6	0.2	G3V796 G3V7I0 P07756 P07895 P63039	GO_BP
Cluster2	response to insulin	1	58	532	22870	0.74	0.745	Q9WVK7	GO_BP
Cluster2	response to interleukin-12	1	58	57	22870	6.92	0.135	P07895	GO_BP
Cluster2	response to ionizing radiation	1	58	289	22870	1.36	0.522	P07895	GO_BP
Cluster2	response to ischemia	1	58	105	22870	3.76	0.235	P63039	GO_BP
Cluster2	response to isolation stress	2	58	14	22870	56.33	0.000564	P07895 Q9ER34	GO_BP
Cluster2	response to ketone	2	58	626	22870	1.26	0.474	F1LN88 P07756	GO_BP
Cluster2	response to lipid	10	58	2020	22870	1.95	0.0294	F1LN88 G3V796 G3V7I0 P07756 P07895 P11915 P18163 P63039 P97519 P97852	GO_BP
Cluster2	response to lipopolysaccharide	5	58	712	22870	2.77	0.0341	F1LN88 G3V7I0 P07756 P07895 P63039	GO_BP
Cluster2	response to luteinizing hormone	1	58	15	22870	26.29	0.0374	P11915	GO_BP
Cluster2	response to magnetism	1	58	15	22870	26.29	0.0374	P07895	GO_BP
Cluster2	response to manganese ion	1	58	67	22870	5.89	0.157	P07895	GO_BP
Cluster2	response to metal ion	3	58	863	22870	1.37	0.375	G3V796 P07756 P07895	GO_BP
Cluster2	response to molecule of bacterial origin	5	58	744	22870	2.65	0.04	F1LN88 G3V7I0 P07756 P07895 P63039	GO_BP
Cluster2	response to monosaccharide	1	58	406	22870	0.97	0.647	P07895	GO_BP
Cluster2	response to nicotine	1	58	132	22870	2.99	0.285	F1LN88	GO_BP
Cluster2	response to nitrogen compound	7	58	2321	22870	1.19	0.374	D3Z900 G3V6I4 P07756 P11915 P12075 P63039 Q9WVK7	GO_BP
Cluster2	response to nutrient	6	58	694	22870	3.41	0.00811	G3V796 P07895 P10888 P18163 P63039 P97519	GO_BP
Cluster2	response to nutrient levels	10	58	1226	22870	3.22	0.000938	G3V796 O55171 P07756 P07895 P10888 P18163 P63039 P97519 Q5U4F4 Q6P2A5	GO_BP
Cluster2	response to oleic acid	2	58	9	22870	87.62	0.000225	P07756 P18163	GO_BP
Cluster2	response to organic cyclic compound	7	58	2215	22870	1.25	0.329	F1LN88 G3V796 P07756 P11915 P18163 P63039 P97852	GO_BP
Cluster2	response to organic substance	15	58	5305	22870	1.11	0.363	F1LN88 G3V796 G3V7I0 O55171 P07756 P07895 P11915 P12075 P18163 P26772 P63039 P85834 P97519 P97852 Q9WVK7	GO_BP
Cluster2	response to organonitrogen compound	5	58	2119	22870	0.93	0.634	P07756 P11915 P12075 P63039 Q9WVK7	GO_BP
Cluster2	response to organophosphorus	2	58	356	22870	2.22	0.228	P07756 P63039	GO_BP
Cluster2	response to other organism	5	58	1556	22870	1.27	0.36	F1LN88 G3V7I0 P07756 P07895 P63039	GO_BP
Cluster2	response to oxidative stress	3	58	767	22870	1.54	0.308	G3V7I0 P07895 P63039	GO_BP
Cluster2	response to oxygen levels	5	58	821	22870	2.4	0.0567	F1LN88 F1M7X5 O55171 P07895 P63039	GO_BP
Cluster2	response to oxygen radical	1	58	32	22870	12.32	0.0781	P07895	GO_BP
Cluster2	response to oxygen-containing compound	11	58	3255	22870	1.33	0.195	F1LN88 G3V7I0 P07756 P07895 P11915 P12075 P18163 P63039 P85834 P97519 Q9WVK7	GO_BP
Cluster2	response to peptide	4	58	1137	22870	1.39	0.326	P07756 P11915 P12075 Q9WVK7	GO_BP
Cluster2	response to peptide hormone	4	58	996	22870	1.58	0.246	P07756 P11915 P12075 Q9WVK7	GO_BP
Cluster2	response to progesterone	1	58	155	22870	2.54	0.326	F1LN88	GO_BP
Cluster2	response to purine-containing compound	2	58	401	22870	1.97	0.271	P07756 P63039	GO_BP
Cluster2	response to radiation	1	58	854	22870	0.46	0.89	P07895	GO_BP
Cluster2	response to reactive oxygen species	3	58	442	22870	2.68	0.102	G3V7I0 P07895 P63039	GO_BP
Cluster2	response to selenium ion	1	58	31	22870	12.72	0.0757	P07895	GO_BP
Cluster2	response to silicon dioxide	1	58	12	22870	32.86	0.03	P07895	GO_BP
Cluster2	response to starvation	4	58	365	22870	4.32	0.0138	G3V796 P07756 P97519 Q6P2A5	GO_BP
Cluster2	response to steroid hormone	5	58	850	22870	2.32	0.0639	F1LN88 G3V796 P07756 P63039 P97852	GO_BP
Cluster2	response to sterol	1	58	51	22870	7.73	0.122	P11915	GO_BP
Cluster2	response to stimulus	26	58	11927	22870	0.86	0.894	D3Z900 F1LN88 F1M7X5 G3V6I4 G3V796 G3V7I0 O55171 P07756 P07895 P10888 P11915 P12075 P15650 P18163 P26772 P27615 P63039 P85834 P97519 P97532 P97852 Q4FZT0 Q5U4F4 Q6P2A5 Q9ER34 Q9WVK7	GO_BP
Cluster2	response to stress	16	58	5256	22870	1.2	0.244	F1LN88 F1M7X5 G3V796 G3V7I0 O55171 P07756 P07895 P15650 P26772 P27615 P63039 P97519 Q4FZT0 Q5U4F4 Q6P2A5 Q9ER34	GO_BP
Cluster2	response to superoxide	1	58	24	22870	16.43	0.0592	P07895	GO_BP
Cluster2	response to temperature stimulus	5	58	361	22870	5.46	0.0022	G3V796 P07895 P15650 P63039 Q5U4F4	GO_BP
Cluster2	response to testosterone	1	58	145	22870	2.72	0.309	F1LN88	GO_BP
Cluster2	response to topologically incorrect protein	2	58	238	22870	3.31	0.122	P26772 P63039	GO_BP
Cluster2	response to toxic substance	9	58	1113	22870	3.19	0.00184	D3Z900 F1LN88 G3V6I4 G3V7I0 P07756 P07895 P63039 P85834 P97532	GO_BP
Cluster2	response to unfolded protein	2	58	208	22870	3.79	0.0978	P26772 P63039	GO_BP
Cluster2	response to vitamin	1	58	274	22870	1.44	0.503	P07895	GO_BP
Cluster2	response to wounding	2	58	1025	22870	0.77	0.74	P07895 Q6P2A5	GO_BP
Cluster2	response to xenobiotic stimulus	3	58	693	22870	1.71	0.257	P07756 P18163 P63039	GO_BP
Cluster2	response to zinc ion	2	58	91	22870	8.67	0.0224	P07756 P07895	GO_BP
Cluster2	retinal metabolic process	1	58	24	22870	16.43	0.0592	Q8VID1	GO_BP
Cluster2	retinoid metabolic process	1	58	128	22870	3.08	0.278	Q8VID1	GO_BP
Cluster2	retinol metabolic process	1	58	48	22870	8.21	0.115	Q8VID1	GO_BP
Cluster2	ribonucleoside bisphosphate biosynthetic process	2	58	86	22870	9.17	0.0202	P08461 P18163	GO_BP
Cluster2	ribonucleoside bisphosphate metabolic process	8	58	216	22870	14.6	7.11e-08	D3ZIQ1 O55171 P07896 P08461 P11915 P18163 P97519 P97852	GO_BP
Cluster2	ribonucleoside diphosphate biosynthetic process	1	58	12	22870	32.86	0.03	Q6P2A5	GO_BP
Cluster2	ribonucleoside diphosphate metabolic process	1	58	152	22870	2.59	0.321	Q6P2A5	GO_BP
Cluster2	ribonucleoside metabolic process	1	58	167	22870	2.36	0.347	Q6P2A5	GO_BP
Cluster2	ribonucleoside monophosphate biosynthetic process	5	58	197	22870	10.01	0.000143	P12075 P19511 P21571 Q4FZT0 Q6P2A5	GO_BP
Cluster2	ribonucleoside monophosphate metabolic process	8	58	400	22870	7.89	7.29e-06	D3ZLT1 P10888 P12075 P19511 P21571 Q4FZT0 Q5XIH3 Q6P2A5	GO_BP
Cluster2	ribonucleoside triphosphate biosynthetic process	5	58	160	22870	12.32	5.35e-05	P12075 P19511 P21571 Q4FZT0 Q6P2A5	GO_BP
Cluster2	ribonucleoside triphosphate metabolic process	8	58	356	22870	8.86	3.1e-06	D3ZLT1 P10888 P12075 P19511 P21571 Q4FZT0 Q5XIH3 Q6P2A5	GO_BP
Cluster2	ribonucleotide biosynthetic process	7	58	334	22870	8.26	2.11e-05	P08461 P12075 P18163 P19511 P21571 Q4FZT0 Q6P2A5	GO_BP
Cluster2	ribonucleotide metabolic process	16	58	726	22870	8.69	2.08e-11	D3ZIQ1 D3ZLT1 O55171 P07896 P08461 P10888 P11915 P12075 P18163 P19511 P21571 P97519 P97852 Q4FZT0 Q5XIH3 Q6P2A5	GO_BP
Cluster2	ribose phosphate biosynthetic process	7	58	338	22870	8.17	2.28e-05	P08461 P12075 P18163 P19511 P21571 Q4FZT0 Q6P2A5	GO_BP
Cluster2	ribose phosphate metabolic process	16	58	745	22870	8.47	3.06e-11	D3ZIQ1 D3ZLT1 O55171 P07896 P08461 P10888 P11915 P12075 P18163 P19511 P21571 P97519 P97852 Q4FZT0 Q5XIH3 Q6P2A5	GO_BP
Cluster2	saturated monocarboxylic acid metabolic process	1	58	3	22870	131.44	0.00759	D3ZIQ1	GO_BP
Cluster2	secondary alcohol metabolic process	1	58	187	22870	2.11	0.379	P97852	GO_BP
Cluster2	secondary metabolic process	2	58	98	22870	8.05	0.0257	B0BNJ4 P97532	GO_BP
Cluster2	secondary metabolite biosynthetic process	1	58	26	22870	15.17	0.0639	P97532	GO_BP
Cluster2	secretion	2	58	1765	22870	0.45	0.945	P28492 Q6AY30	GO_BP
Cluster2	secretion by cell	2	58	1556	22870	0.51	0.912	P28492 Q6AY30	GO_BP
Cluster2	sensory perception	1	58	1361	22870	0.29	0.972	Q64057	GO_BP
Cluster2	sensory perception of mechanical stimulus	1	58	278	22870	1.42	0.508	Q64057	GO_BP
Cluster2	sensory perception of sound	1	58	224	22870	1.76	0.435	Q64057	GO_BP
Cluster2	serine family amino acid biosynthetic process	1	58	29	22870	13.6	0.071	Q64565	GO_BP
Cluster2	serine family amino acid catabolic process	1	58	19	22870	20.75	0.0471	Q5I0P2	GO_BP
Cluster2	serine family amino acid metabolic process	3	58	66	22870	17.92	0.000632	P97532 Q5I0P2 Q64565	GO_BP
Cluster2	sex differentiation	1	58	543	22870	0.73	0.752	P97852	GO_BP
Cluster2	short-chain fatty acid metabolic process	1	58	23	22870	17.14	0.0568	D3ZIQ1	GO_BP
Cluster2	signal transduction	5	58	6900	22870	0.29	1	P07895 P18163 P27615 P63039 Q4FZT0	GO_BP
Cluster2	signaling	5	58	7532	22870	0.26	1	P07895 P18163 P27615 P63039 Q4FZT0	GO_BP
Cluster2	sleep	1	58	41	22870	9.62	0.099	P08461	GO_BP
Cluster2	small molecule biosynthetic process	10	58	951	22870	4.15	0.000125	A2VCW9 D4A2K1 P04636 P07756 P11915 P28492 P97519 Q64565 Q9WVK3 Q9Z2M4	GO_BP
Cluster2	small molecule catabolic process	27	58	650	22870	16.38	1.2e-26	A2VCW9 B3DMA2 D3ZHR2 D3ZIQ1 D4A2K1 G3V796 G3V7J0 O55171 P07896 P13803 P14604 P15650 P28492 P29266 P97519 P97532 P97852 Q2M2R8 Q5I0P2 Q5XIC0 Q64057 Q64565 Q64602 Q9WVK3 Q9WVK7 Q9Z2M4 Q9Z311	GO_BP
Cluster2	small molecule metabolic process	47	58	2879	22870	6.44	1.97e-32	A2VCW9 B3DMA2 D3Z900 D3ZHR2 D3ZIQ1 D3ZLT1 D4A2K1 F1LN88 G3V6I4 G3V796 G3V7J0 O55171 P04636 P07756 P07896 P08461 P10888 P11915 P12075 P13803 P14604 P15650 P18163 P19511 P21571 P27615 P28492 P29266 P97519 P97532 P97852 Q2M2R8 Q4FZT0 Q5I0P2 Q5XIC0 Q5XIH3 Q64057 Q64565 Q64602 Q6AYQ8 Q6P2A5 Q8VID1 Q9ER34 Q9WVK3 Q9WVK7 Q9Z2M4 Q9Z311	GO_BP
Cluster2	somatic cell DNA recombination	1	58	57	22870	6.92	0.135	P63039	GO_BP
Cluster2	somatic diversification of immune receptors	1	58	64	22870	6.16	0.15	P63039	GO_BP
Cluster2	somatic diversification of immunoglobulins	1	58	44	22870	8.96	0.106	P63039	GO_BP
Cluster2	spinal cord development	1	58	212	22870	1.86	0.418	P97532	GO_BP
Cluster2	steroid biosynthetic process	1	58	221	22870	1.78	0.431	P11915	GO_BP
Cluster2	steroid metabolic process	3	58	448	22870	2.64	0.105	P11915 P97852 Q8VID1	GO_BP
Cluster2	sterol metabolic process	1	58	194	22870	2.03	0.39	P97852	GO_BP
Cluster2	sterol transport	1	58	115	22870	3.43	0.254	P11915	GO_BP
Cluster2	stress-induced mitochondrial fusion	1	58	1	22870	394.31	0.00254	Q4FZT0	GO_BP
Cluster2	striated muscle cell differentiation	1	58	381	22870	1.03	0.623	G3V796	GO_BP
Cluster2	striated muscle tissue development	1	58	539	22870	0.73	0.75	G3V796	GO_BP
Cluster2	succinyl-CoA metabolic process	1	58	9	22870	43.81	0.0226	D3ZIQ1	GO_BP
Cluster2	sulfide oxidation	1	58	5	22870	78.86	0.0126	B0BNJ4	GO_BP
Cluster2	sulfur amino acid catabolic process	1	58	22	22870	17.92	0.0544	P97532	GO_BP
Cluster2	sulfur amino acid metabolic process	2	58	59	22870	13.37	0.00986	P07756 P97532	GO_BP
Cluster2	sulfur compound biosynthetic process	3	58	244	22870	4.85	0.0241	P08461 P18163 P97532	GO_BP
Cluster2	sulfur compound catabolic process	1	58	83	22870	4.75	0.19	P97532	GO_BP
Cluster2	sulfur compound metabolic process	12	58	582	22870	8.13	2.02e-08	B0BNJ4 D3ZIQ1 O55171 P07756 P07895 P07896 P08461 P11915 P18163 P97519 P97532 P97852	GO_BP
Cluster2	superoxide anion generation	1	58	17	22870	23.19	0.0423	P07895	GO_BP
Cluster2	superoxide metabolic process	1	58	49	22870	8.05	0.117	P07895	GO_BP
Cluster2	system development	13	58	7194	22870	0.71	0.952	F1LN88 G3V796 G3V7I0 P07756 P07895 P27615 P63039 P97519 P97532 P97852 Q2M2R8 Q6P2A5 Q9ER34	GO_BP
Cluster2	system process	4	58	3165	22870	0.5	0.968	P07756 P07895 Q2M2R8 Q64057	GO_BP
Cluster2	telencephalon cell migration	1	58	111	22870	3.55	0.246	Q2M2R8	GO_BP
Cluster2	telencephalon development	2	58	518	22870	1.52	0.379	Q2M2R8 Q6P2A5	GO_BP
Cluster2	temperature homeostasis	1	58	74	22870	5.33	0.172	P15650	GO_BP
Cluster2	terpenoid metabolic process	2	58	182	22870	4.33	0.0779	Q8VID1 Q9WVK3	GO_BP
Cluster2	thioester biosynthetic process	2	58	67	22870	11.77	0.0126	P08461 P18163	GO_BP
Cluster2	thioester metabolic process	8	58	166	22870	19	9.16e-09	D3ZIQ1 O55171 P07896 P08461 P11915 P18163 P97519 P97852	GO_BP
Cluster2	thymine catabolic process	1	58	6	22870	65.72	0.0151	G3V7J0	GO_BP
Cluster2	thymine metabolic process	1	58	6	22870	65.72	0.0151	G3V7J0	GO_BP
Cluster2	tissue development	3	58	2732	22870	0.43	0.976	G3V796 P07756 P97852	GO_BP
Cluster2	tissue migration	1	58	158	22870	2.5	0.331	F1M7X5	GO_BP
Cluster2	toll-like receptor signaling pathway	1	58	126	22870	3.13	0.274	P63039	GO_BP
Cluster2	toxin biosynthetic process	1	58	7	22870	56.33	0.0176	P97532	GO_BP
Cluster2	toxin metabolic process	2	58	43	22870	18.34	0.00534	B0BNJ4 P97532	GO_BP
Cluster2	transition metal ion homeostasis	1	58	202	22870	1.95	0.403	P07895	GO_BP
Cluster2	translation	1	58	599	22870	0.66	0.786	P85834	GO_BP
Cluster2	translational elongation	1	58	133	22870	2.96	0.287	P85834	GO_BP
Cluster2	transmembrane transport	10	58	1907	22870	2.07	0.0207	D3ZHR2 P10888 P12075 P19511 P21571 P63039 P97576 Q2M2R8 Q4FZT0 Q642G4	GO_BP
Cluster2	transport	23	58	6073	22870	1.49	0.0201	D3ZHR2 D3ZIQ1 O55171 P07896 P10888 P11915 P12075 P18163 P19511 P21571 P27615 P28492 P63039 P97519 P97576 Q2M2R8 Q4FZT0 Q5XIC0 Q642G4 Q6AY30 Q8VID1 Q9WVK3 Q9Z2M4	GO_BP
Cluster2	transport along microtubule	1	58	235	22870	1.68	0.451	Q642G4	GO_BP
Cluster2	transsulfuration	1	58	9	22870	43.81	0.0226	P97532	GO_BP
Cluster2	tricarboxylic acid cycle	3	58	40	22870	29.57	0.000143	P04636 Q6AYQ8 Q9ER34	GO_BP
Cluster2	tricarboxylic acid metabolic process	3	58	63	22870	18.78	0.000552	P04636 Q6AYQ8 Q9ER34	GO_BP
Cluster2	triglyceride biosynthetic process	1	58	30	22870	13.14	0.0734	P18163	GO_BP
Cluster2	triglyceride catabolic process	1	58	38	22870	10.38	0.0921	P07756	GO_BP
Cluster2	triglyceride metabolic process	2	58	122	22870	6.46	0.0384	P07756 P18163	GO_BP
Cluster2	tryptophan catabolic process	1	58	16	22870	24.64	0.0398	Q64602	GO_BP
Cluster2	tryptophan metabolic process	1	58	22	22870	17.92	0.0544	Q64602	GO_BP
Cluster2	tube development	1	58	1423	22870	0.28	0.976	P07756	GO_BP
Cluster2	unsaturated fatty acid biosynthetic process	1	58	69	22870	5.71	0.161	Q9Z2M4	GO_BP
Cluster2	unsaturated fatty acid metabolic process	3	58	233	22870	5.08	0.0214	D3ZHR2 P18163 Q9Z2M4	GO_BP
Cluster2	unsaturated monocarboxylic acid metabolic process	1	58	3	22870	131.44	0.00759	D3ZIQ1	GO_BP
Cluster2	urea cycle	1	58	17	22870	23.19	0.0423	P07756	GO_BP
Cluster2	urea metabolic process	1	58	34	22870	11.6	0.0828	P07756	GO_BP
Cluster2	urogenital system development	1	58	598	22870	0.66	0.785	P97532	GO_BP
Cluster2	vacuolar transport	1	58	171	22870	2.31	0.353	P27615	GO_BP
Cluster2	valine catabolic process	2	58	3	22870	262.87	1.89e-05	G3V7J0 P29266	GO_BP
Cluster2	valine metabolic process	2	58	16	22870	49.29	0.000741	G3V7J0 P29266	GO_BP
Cluster2	vascular process in circulatory system	2	58	366	22870	2.15	0.238	P07756 P07895	GO_BP
Cluster2	vasodilation	2	58	72	22870	10.95	0.0144	P07756 P07895	GO_BP
Cluster2	very long-chain fatty acid catabolic process	2	58	16	22870	49.29	0.000741	D3ZHR2 O55171	GO_BP
Cluster2	very long-chain fatty acid metabolic process	5	58	56	22870	35.21	3.04e-07	D3ZHR2 D3ZIQ1 O55171 P97852 Q2M2R8	GO_BP
Cluster2	very long-chain fatty-acyl-CoA metabolic process	1	58	2	22870	197.16	0.00507	P97852	GO_BP
Cluster2	vesicle-mediated transport	2	58	2512	22870	0.31	0.99	P27615 Q6AY30	GO_BP
Cluster2	viral entry into host cell	1	58	90	22870	4.38	0.205	F1M7X5	GO_BP
Cluster2	viral life cycle	1	58	188	22870	2.1	0.381	F1M7X5	GO_BP
Cluster2	viral process	1	58	360	22870	1.1	0.602	F1M7X5	GO_BP
Cluster2	wound healing	1	58	802	22870	0.49	0.874	Q6P2A5	GO_BP
Cluster2	xenobiotic catabolic process	1	58	33	22870	11.95	0.0804	P18163	GO_BP
Cluster2	xenobiotic metabolic process	1	58	262	22870	1.51	0.488	P18163	GO_BP
Cluster3	AMPA glutamate receptor clustering	1	38	15	22870	40.12	0.0246	P02650	GO_BP
Cluster3	ATP metabolic process	1	38	319	22870	1.89	0.414	P46462	GO_BP
Cluster3	C21-steroid hormone metabolic process	4	38	70	22870	34.39	5.49e-06	G3V635 P05183 P51538 Q06884	GO_BP
Cluster3	COPII vesicle coating	1	38	79	22870	7.62	0.123	Q6NYB7	GO_BP
Cluster3	COPII-coated vesicle budding	1	38	88	22870	6.84	0.136	Q6NYB7	GO_BP
Cluster3	DNA biosynthetic process	1	38	125	22870	4.81	0.188	P46462	GO_BP
Cluster3	DNA metabolic process	1	38	945	22870	0.64	0.799	P46462	GO_BP
Cluster3	DNA repair	1	38	542	22870	1.11	0.598	P46462	GO_BP
Cluster3	DNA synthesis involved in DNA repair	1	38	64	22870	9.4	0.101	P46462	GO_BP
Cluster3	ER to Golgi vesicle-mediated transport	2	38	253	22870	4.76	0.0661	P46462 Q6NYB7	GO_BP
Cluster3	ER-associated misfolded protein catabolic process	1	38	15	22870	40.12	0.0246	P46462	GO_BP
Cluster3	ERAD pathway	1	38	119	22870	5.06	0.18	P46462	GO_BP
Cluster3	G-protein coupled receptor signaling pathway	1	38	1726	22870	0.35	0.949	P02650	GO_BP
Cluster3	GDP-mannose metabolic process	1	38	9	22870	66.87	0.0149	D4A8N1	GO_BP
Cluster3	GPI anchor biosynthetic process	1	38	37	22870	16.27	0.0597	D4A8N1	GO_BP
Cluster3	GPI anchor metabolic process	1	38	41	22870	14.68	0.066	D4A8N1	GO_BP
Cluster3	Golgi apparatus mannose trimming	1	38	5	22870	120.37	0.00828	D3ZR49	GO_BP
Cluster3	Golgi organization	2	38	160	22870	7.52	0.029	Q6AXN3 Q6NYB7	GO_BP
Cluster3	Golgi ribbon formation	1	38	29	22870	20.75	0.0471	Q6AXN3	GO_BP
Cluster3	Golgi vesicle budding	1	38	100	22870	6.02	0.154	Q6NYB7	GO_BP
Cluster3	Golgi vesicle transport	4	38	499	22870	4.82	0.00919	B0BNG3 P46462 Q6NYB7 Q9WVB1	GO_BP
Cluster3	IRE1-mediated unfolded protein response	1	38	82	22870	7.34	0.128	Q63081	GO_BP
Cluster3	N-glycan processing	1	38	25	22870	24.07	0.0407	D3ZR49	GO_BP
Cluster3	NAD metabolic process	1	38	145	22870	4.15	0.215	P46462	GO_BP
Cluster3	NADH metabolic process	1	38	94	22870	6.4	0.145	P46462	GO_BP
Cluster3	NADP metabolic process	1	38	52	22870	11.57	0.0829	P36365	GO_BP
Cluster3	NADPH oxidation	1	38	16	22870	37.62	0.0263	P36365	GO_BP
Cluster3	NMDA glutamate receptor clustering	1	38	16	22870	37.62	0.0263	P02650	GO_BP
Cluster3	Rab protein signal transduction	1	38	6	22870	100.31	0.00993	Q9WVB1	GO_BP
Cluster3	Ras protein signal transduction	1	38	251	22870	2.4	0.343	Q9WVB1	GO_BP
Cluster3	UDP-N-acetylglucosamine catabolic process	1	38	1	22870	601.84	0.00166	Q09325	GO_BP
Cluster3	UDP-N-acetylglucosamine metabolic process	1	38	13	22870	46.3	0.0214	Q09325	GO_BP
Cluster3	acute inflammatory response	2	38	167	22870	7.21	0.0314	P24090 Q64550	GO_BP
Cluster3	acute-phase response	2	38	67	22870	17.97	0.00555	P24090 Q64550	GO_BP
Cluster3	acyl-CoA metabolic process	1	38	166	22870	3.63	0.242	P16303	GO_BP
Cluster3	acylglycerol catabolic process	3	38	66	22870	27.36	0.00018	P02650 P16303 Q64573	GO_BP
Cluster3	acylglycerol homeostasis	1	38	60	22870	10.03	0.0951	P02650	GO_BP
Cluster3	acylglycerol metabolic process	3	38	166	22870	10.88	0.00263	P02650 P16303 Q64573	GO_BP
Cluster3	aggresome assembly	1	38	16	22870	37.62	0.0263	P46462	GO_BP
Cluster3	aging	6	38	781	22870	4.62	0.00169	G3V635 G3V7K3 P02650 P05183 P13107 Q06884	GO_BP
Cluster3	alcohol biosynthetic process	6	38	154	22870	23.45	1.95e-07	G3V635 P02650 P05183 P16303 P51538 Q06884	GO_BP
Cluster3	alcohol catabolic process	1	38	85	22870	7.08	0.132	P02650	GO_BP
Cluster3	alcohol metabolic process	9	38	471	22870	11.5	5.92e-08	A0A096MJW5 D4A8N1 G3V635 P02650 P05183 P16303 P51538 P55159 Q06884	GO_BP
Cluster3	alkaloid catabolic process	4	38	12	22870	200.61	3.18e-09	G3V635 P05183 P51538 Q06884	GO_BP
Cluster3	alkaloid metabolic process	4	38	19	22870	126.7	2.47e-08	G3V635 P05183 P51538 Q06884	GO_BP
Cluster3	amide transport	6	38	1679	22870	2.15	0.0568	G3V8G5 O35913 P02650 P46462 Q6NYB7 Q9WVB1	GO_BP
Cluster3	amino sugar catabolic process	1	38	15	22870	40.12	0.0246	Q09325	GO_BP
Cluster3	amino sugar metabolic process	1	38	56	22870	10.75	0.089	Q09325	GO_BP
Cluster3	amino-acid betaine metabolic process	1	38	26	22870	23.15	0.0423	P00388	GO_BP
Cluster3	ammonium ion metabolic process	2	38	289	22870	4.16	0.0831	P00388 P55159	GO_BP
Cluster3	amyloid precursor protein metabolic process	1	38	26	22870	23.15	0.0423	P02650	GO_BP
Cluster3	anatomical structure development	14	38	8303	22870	1.01	0.534	D3ZR49 D4A6E3 G3V7K3 G3V8G5 O35913 P02650 P14046 P16303 P24090 Q09325 Q3KR94 Q63041 Q64550 Q6NYB7	GO_BP
Cluster3	anatomical structure homeostasis	1	38	509	22870	1.18	0.575	F1LM05	GO_BP
Cluster3	anatomical structure morphogenesis	4	38	3517	22870	0.68	0.857	G3V8G5 P02650 Q3KR94 Q6NYB7	GO_BP
Cluster3	androgen metabolic process	4	38	76	22870	31.68	7.63e-06	G3V635 P05183 P51538 Q06884	GO_BP
Cluster3	animal organ development	7	38	5308	22870	0.79	0.812	D3ZR49 G3V7K3 G3V8G5 O35913 P24090 Q3KR94 Q64550	GO_BP
Cluster3	animal organ morphogenesis	1	38	1541	22870	0.39	0.93	G3V8G5	GO_BP
Cluster3	animal organ regeneration	4	38	226	22870	10.65	0.000527	O35913 P24090 Q3KR94 Q64550	GO_BP
Cluster3	anion homeostasis	1	38	82	22870	7.34	0.128	P02650	GO_BP
Cluster3	anion transmembrane transport	1	38	582	22870	1.03	0.625	O35913	GO_BP
Cluster3	anion transport	2	38	881	22870	1.37	0.433	O35913 P02650	GO_BP
Cluster3	anterograde trans-synaptic signaling	1	38	737	22870	0.82	0.712	P02650	GO_BP
Cluster3	antibiotic catabolic process	1	38	66	22870	9.12	0.104	Q64550	GO_BP
Cluster3	antibiotic metabolic process	1	38	204	22870	2.95	0.289	Q64550	GO_BP
Cluster3	antigen processing and presentation	1	38	277	22870	2.17	0.371	Q9WVB1	GO_BP
Cluster3	apoptotic cell clearance	1	38	64	22870	9.4	0.101	Q63081	GO_BP
Cluster3	arachidonic acid metabolic process	2	38	155	22870	7.77	0.0274	P08683 P13107	GO_BP
Cluster3	aromatic compound biosynthetic process	1	38	2150	22870	0.28	0.977	P46462	GO_BP
Cluster3	aromatic compound catabolic process	6	38	682	22870	5.29	0.000842	P08542 P46462 P55159 Q09325 Q64550 Q68FP2	GO_BP
Cluster3	artery development	1	38	154	22870	3.91	0.227	P02650	GO_BP
Cluster3	artery morphogenesis	1	38	102	22870	5.9	0.156	P02650	GO_BP
Cluster3	autophagosome assembly	1	38	78	22870	7.72	0.122	Q6NYB7	GO_BP
Cluster3	autophagosome maturation	1	38	32	22870	18.81	0.0519	P46462	GO_BP
Cluster3	autophagosome organization	1	38	82	22870	7.34	0.128	Q6NYB7	GO_BP
Cluster3	autophagy	2	38	273	22870	4.41	0.0754	P46462 Q6NYB7	GO_BP
Cluster3	auxin catabolic process	1	38	1	22870	601.84	0.00166	Q68FP2	GO_BP
Cluster3	auxin metabolic process	1	38	1	22870	601.84	0.00166	Q68FP2	GO_BP
Cluster3	axon development	1	38	709	22870	0.85	0.698	P02650	GO_BP
Cluster3	axon regeneration	1	38	46	22870	13.08	0.0737	P02650	GO_BP
Cluster3	behavior	1	38	1179	22870	0.51	0.866	P02650	GO_BP
Cluster3	benzene-containing compound metabolic process	2	38	57	22870	21.12	0.00405	Q64550 Q68FP2	GO_BP
Cluster3	bile acid and bile salt transport	1	38	73	22870	8.24	0.114	O35913	GO_BP
Cluster3	bilirubin conjugation	1	38	6	22870	100.31	0.00993	Q64550	GO_BP
Cluster3	biological adhesion	3	38	1115	22870	1.62	0.282	Q3KR94 Q63081 Q6NYB7	GO_BP
Cluster3	biological regulation	27	38	16872	22870	0.96	0.721	A0A096MJW5 B0BNG3 D4A6E3 F1LM05 G3V635 G3V7K3 G3V8G5 O35913 P00388 P02650 P02770 P05183 P14046 P16303 P24090 P46462 P51538 P55159 Q06884 Q3KR94 Q63041 Q63081 Q63083 Q64550 Q68FP2 Q6NYB7 Q9WVB1	GO_BP
Cluster3	biosynthetic process	10	38	4691	22870	1.28	0.24	D4A8N1 G3V635 P02650 P02706 P05183 P16303 P46462 P51538 Q06884 Q09325	GO_BP
Cluster3	biphenyl catabolic process	1	38	3	22870	200.61	0.00498	Q64550	GO_BP
Cluster3	biphenyl metabolic process	1	38	14	22870	42.99	0.023	Q64550	GO_BP
Cluster3	blood circulation	3	38	762	22870	2.37	0.132	P02650 P02770 P55159	GO_BP
Cluster3	blood coagulation	1	38	408	22870	1.48	0.496	Q63081	GO_BP
Cluster3	blood vessel development	1	38	746	22870	0.81	0.717	P02650	GO_BP
Cluster3	blood vessel morphogenesis	1	38	560	22870	1.07	0.61	P02650	GO_BP
Cluster3	bone development	1	38	288	22870	2.09	0.382	G3V8G5	GO_BP
Cluster3	bone morphogenesis	1	38	147	22870	4.09	0.217	G3V8G5	GO_BP
Cluster3	brain development	1	38	1365	22870	0.44	0.904	P24090	GO_BP
Cluster3	cGMP-mediated signaling	1	38	23	22870	26.17	0.0375	P02650	GO_BP
Cluster3	calcitriol biosynthetic process from calciol	4	38	18	22870	133.74	1.95e-08	G3V635 P05183 P51538 Q06884	GO_BP
Cluster3	calcium ion homeostasis	1	38	778	22870	0.77	0.732	P02650	GO_BP
Cluster3	carbohydrate derivative biosynthetic process	4	38	890	22870	2.7	0.0591	D4A8N1 P02706 P46462 Q09325	GO_BP
Cluster3	carbohydrate derivative catabolic process	1	38	234	22870	2.57	0.324	Q09325	GO_BP
Cluster3	carbohydrate derivative metabolic process	6	38	1630	22870	2.22	0.0504	D3ZR49 D4A8N1 P02706 P16303 P46462 Q09325	GO_BP
Cluster3	carbohydrate metabolic process	2	38	589	22870	2.04	0.256	Q09325 Q64550	GO_BP
Cluster3	carboxylic acid biosynthetic process	4	38	572	22870	4.21	0.0146	G3V635 P05183 P51538 Q06884	GO_BP
Cluster3	carboxylic acid catabolic process	4	38	385	22870	6.25	0.00371	P16303 P55159 Q64573 Q68FP2	GO_BP
Cluster3	carboxylic acid metabolic process	12	38	1484	22870	4.87	2.96e-06	G3V635 P00388 P05183 P08683 P13107 P16303 P51538 P55159 Q06884 Q64550 Q64573 Q68FP2	GO_BP
Cluster3	carboxylic acid transmembrane transport	1	38	294	22870	2.05	0.389	O35913	GO_BP
Cluster3	carboxylic acid transport	2	38	454	22870	2.65	0.174	O35913 P02650	GO_BP
Cluster3	cardiovascular system development	1	38	820	22870	0.73	0.751	P02650	GO_BP
Cluster3	cargo loading into COPII-coated vesicle	1	38	17	22870	35.4	0.0279	Q6NYB7	GO_BP
Cluster3	cargo loading into vesicle	1	38	32	22870	18.81	0.0519	Q6NYB7	GO_BP
Cluster3	carnitine metabolic process	1	38	24	22870	25.08	0.0391	P00388	GO_BP
Cluster3	catabolic process	16	38	2611	22870	3.69	1.5e-06	G3V635 P00388 P02650 P05183 P08542 P13107 P16303 P46462 P51538 P55159 Q06884 Q09325 Q64550 Q64573 Q68FP2 Q6NYB7	GO_BP
Cluster3	cation homeostasis	2	38	1176	22870	1.02	0.589	G3V7K3 P02650	GO_BP
Cluster3	cation transmembrane transport	1	38	1175	22870	0.51	0.865	G3V7K3	GO_BP
Cluster3	cation transport	1	38	1432	22870	0.42	0.914	G3V7K3	GO_BP
Cluster3	cell activation	5	38	1643	22870	1.83	0.134	F1LM05 P24090 P46462 Q63081 Q9WVB1	GO_BP
Cluster3	cell activation involved in immune response	4	38	900	22870	2.67	0.0611	F1LM05 P24090 P46462 Q9WVB1	GO_BP
Cluster3	cell adhesion	3	38	1100	22870	1.64	0.276	Q3KR94 Q63081 Q6NYB7	GO_BP
Cluster3	cell adhesion mediated by integrin	1	38	28	22870	21.49	0.0455	Q3KR94	GO_BP
Cluster3	cell communication	8	38	7722	22870	0.62	0.971	A0A096MJW5 P02650 P02706 P02770 P46462 Q63081 Q6NYB7 Q9WVB1	GO_BP
Cluster3	cell cycle	1	38	1422	22870	0.42	0.913	Q9WVB1	GO_BP
Cluster3	cell development	2	38	2718	22870	0.44	0.95	P02650 Q6NYB7	GO_BP
Cluster3	cell differentiation	4	38	5481	22870	0.44	0.99	P02650 P16303 Q3KR94 Q6NYB7	GO_BP
Cluster3	cell killing	1	38	208	22870	2.89	0.294	P02770	GO_BP
Cluster3	cell migration	3	38	1379	22870	1.31	0.404	G3V8G5 Q3KR94 Q6NYB7	GO_BP
Cluster3	cell morphogenesis	1	38	1228	22870	0.49	0.877	Q6NYB7	GO_BP
Cluster3	cell morphogenesis involved in differentiation	1	38	979	22870	0.61	0.811	Q6NYB7	GO_BP
Cluster3	cell motility	3	38	1550	22870	1.16	0.481	G3V8G5 Q3KR94 Q6NYB7	GO_BP
Cluster3	cell projection organization	1	38	1868	22870	0.32	0.961	P02650	GO_BP
Cluster3	cell proliferation	1	38	1245	22870	0.48	0.881	Q3KR94	GO_BP
Cluster3	cell-cell adhesion	1	38	597	22870	1.01	0.634	Q63081	GO_BP
Cluster3	cell-cell signaling	2	38	1602	22870	0.75	0.756	P02650 Q6NYB7	GO_BP
Cluster3	cell-matrix adhesion	1	38	201	22870	2.99	0.285	Q3KR94	GO_BP
Cluster3	cell-substrate adhesion	2	38	266	22870	4.53	0.0721	Q3KR94 Q6NYB7	GO_BP
Cluster3	cellular alcohol biosynthetic process	4	38	19	22870	126.7	2.47e-08	G3V635 P05183 P51538 Q06884	GO_BP
Cluster3	cellular alcohol metabolic process	4	38	19	22870	126.7	2.47e-08	G3V635 P05183 P51538 Q06884	GO_BP
Cluster3	cellular amide metabolic process	1	38	1251	22870	0.48	0.882	P16303	GO_BP
Cluster3	cellular aromatic compound metabolic process	9	38	4758	22870	1.14	0.392	D4A8N1 P08542 P16303 P36365 P46462 P55159 Q09325 Q64550 Q68FP2	GO_BP
Cluster3	cellular biosynthetic process	9	38	4426	22870	1.22	0.307	D4A8N1 G3V635 P02650 P02706 P05183 P46462 P51538 Q06884 Q09325	GO_BP
Cluster3	cellular calcium ion homeostasis	1	38	740	22870	0.81	0.714	P02650	GO_BP
Cluster3	cellular catabolic process	16	38	2344	22870	4.11	3.46e-07	G3V635 P00388 P02650 P05183 P08542 P13107 P16303 P46462 P51538 P55159 Q06884 Q09325 Q64550 Q64573 Q68FP2 Q6NYB7	GO_BP
Cluster3	cellular cation homeostasis	2	38	1037	22870	1.16	0.519	G3V7K3 P02650	GO_BP
Cluster3	cellular chemical homeostasis	2	38	1275	22870	0.94	0.634	G3V7K3 P02650	GO_BP
Cluster3	cellular component assembly	6	38	3682	22870	0.98	0.589	P02650 P16303 P24090 P46462 Q3KR94 Q6NYB7	GO_BP
Cluster3	cellular component biogenesis	6	38	3986	22870	0.91	0.671	P02650 P16303 P24090 P46462 Q3KR94 Q6NYB7	GO_BP
Cluster3	cellular component disassembly	1	38	537	22870	1.12	0.595	P46462	GO_BP
Cluster3	cellular component morphogenesis	1	38	1413	22870	0.43	0.912	Q6NYB7	GO_BP
Cluster3	cellular component organization	8	38	8025	22870	0.6	0.98	P02650 P02770 P16303 P24090 P46462 Q3KR94 Q6AXN3 Q6NYB7	GO_BP
Cluster3	cellular component organization or biogenesis	8	38	8281	22870	0.58	0.986	P02650 P02770 P16303 P24090 P46462 Q3KR94 Q6AXN3 Q6NYB7	GO_BP
Cluster3	cellular detoxification	2	38	132	22870	9.12	0.0203	P02650 P02770	GO_BP
Cluster3	cellular developmental process	4	38	5612	22870	0.43	0.992	P02650 P16303 Q3KR94 Q6NYB7	GO_BP
Cluster3	cellular divalent inorganic cation homeostasis	1	38	769	22870	0.78	0.728	P02650	GO_BP
Cluster3	cellular glucuronidation	1	38	23	22870	26.17	0.0375	Q64550	GO_BP
Cluster3	cellular homeostasis	2	38	1447	22870	0.83	0.703	G3V7K3 P02650	GO_BP
Cluster3	cellular hormone metabolic process	5	38	199	22870	15.12	1.89e-05	G3V635 P05183 P51538 Q06884 Q64550	GO_BP
Cluster3	cellular ion homeostasis	2	38	1063	22870	1.13	0.533	G3V7K3 P02650	GO_BP
Cluster3	cellular iron ion homeostasis	1	38	109	22870	5.52	0.166	G3V7K3	GO_BP
Cluster3	cellular ketone metabolic process	5	38	143	22870	21.04	3.79e-06	G3V635 P05183 P13107 P51538 Q06884	GO_BP
Cluster3	cellular lipid catabolic process	3	38	319	22870	5.66	0.0158	P02650 P16303 Q64573	GO_BP
Cluster3	cellular lipid metabolic process	14	38	1535	22870	5.49	7.43e-08	D4A8N1 G3V635 P00388 P02650 P05183 P08683 P13107 P16303 P51538 P55159 Q06884 Q64550 Q64573 Q68FP2	GO_BP
Cluster3	cellular localization	7	38	3451	22870	1.22	0.347	G3V8G5 P02650 P02770 P16303 P46462 Q6NYB7 Q9WVB1	GO_BP
Cluster3	cellular macromolecular complex assembly	2	38	1178	22870	1.02	0.59	Q3KR94 Q6NYB7	GO_BP
Cluster3	cellular macromolecule biosynthetic process	5	38	2709	22870	1.11	0.474	D4A8N1 P02650 P02706 P46462 Q09325	GO_BP
Cluster3	cellular macromolecule catabolic process	1	38	1029	22870	0.58	0.826	P46462	GO_BP
Cluster3	cellular macromolecule localization	5	38	2067	22870	1.46	0.257	G3V8G5 P02650 P46462 Q6NYB7 Q9WVB1	GO_BP
Cluster3	cellular macromolecule metabolic process	13	38	7297	22870	1.07	0.44	D3ZR49 D4A8N1 P00388 P02650 P02706 P02770 P24090 P46462 Q09325 Q63081 Q63083 Q6NYB7 Q9WVB1	GO_BP
Cluster3	cellular metabolic process	27	38	11003	22870	1.48	0.00352	A0A096MJW5 D3ZR49 D4A8N1 G3V635 P00388 P02650 P02706 P02770 P05183 P08542 P08683 P13107 P16303 P24090 P36365 P46462 P51538 P55159 Q06884 Q09325 Q63081 Q63083 Q64550 Q64573 Q68FP2 Q6NYB7 Q9WVB1	GO_BP
Cluster3	cellular metal ion homeostasis	2	38	918	22870	1.31	0.454	G3V7K3 P02650	GO_BP
Cluster3	cellular modified amino acid metabolic process	1	38	310	22870	1.94	0.405	P00388	GO_BP
Cluster3	cellular nitrogen compound biosynthetic process	1	38	2869	22870	0.21	0.994	P46462	GO_BP
Cluster3	cellular nitrogen compound catabolic process	8	38	653	22870	7.37	9.7e-06	G3V635 P00388 P05183 P46462 P51538 Q06884 Q09325 Q64550	GO_BP
Cluster3	cellular nitrogen compound metabolic process	11	38	5421	22870	1.22	0.277	D4A8N1 G3V635 P00388 P05183 P16303 P36365 P46462 P51538 Q06884 Q09325 Q64550	GO_BP
Cluster3	cellular organofluorine metabolic process	1	38	1	22870	601.84	0.00166	P00388	GO_BP
Cluster3	cellular organohalogen metabolic process	1	38	1	22870	601.84	0.00166	P00388	GO_BP
Cluster3	cellular oxidant detoxification	2	38	123	22870	9.79	0.0178	P02650 P02770	GO_BP
Cluster3	cellular pigmentation	1	38	73	22870	8.24	0.114	Q6NYB7	GO_BP
Cluster3	cellular process	32	38	19704	22870	0.98	0.732	A0A096MJW5 D3ZR49 D4A8N1 F1LM05 G3V635 G3V7K3 G3V8G5 P00388 P02650 P02706 P02770 P05183 P08542 P08683 P13107 P16303 P24090 P36365 P46462 P51538 P55159 Q06884 Q09325 Q3KR94 Q63081 Q63083 Q64550 Q64573 Q68FP2 Q6AXN3 Q6NYB7 Q9WVB1	GO_BP
Cluster3	cellular protein catabolic process	1	38	674	22870	0.89	0.679	P46462	GO_BP
Cluster3	cellular protein localization	5	38	2052	22870	1.47	0.252	G3V8G5 P02650 P46462 Q6NYB7 Q9WVB1	GO_BP
Cluster3	cellular protein metabolic process	13	38	5114	22870	1.53	0.0642	D3ZR49 D4A8N1 P00388 P02650 P02706 P02770 P24090 P46462 Q09325 Q63081 Q63083 Q6NYB7 Q9WVB1	GO_BP
Cluster3	cellular protein modification process	13	38	4163	22870	1.88	0.0137	D3ZR49 D4A8N1 P00388 P02650 P02706 P02770 P24090 P46462 Q09325 Q63081 Q63083 Q6NYB7 Q9WVB1	GO_BP
Cluster3	cellular response to DNA damage stimulus	1	38	940	22870	0.64	0.797	P46462	GO_BP
Cluster3	cellular response to alcohol	2	38	202	22870	5.96	0.0443	P02650 Q64550	GO_BP
Cluster3	cellular response to antibiotic	2	38	310	22870	3.88	0.0937	P02650 Q64550	GO_BP
Cluster3	cellular response to cAMP	1	38	150	22870	4.01	0.221	F1LM05	GO_BP
Cluster3	cellular response to chemical stimulus	17	38	4748	22870	2.15	0.000753	F1LM05 G3V635 P00388 P02650 P02770 P05183 P08683 P13107 P16303 P24090 P36365 P46462 P51538 Q06884 Q63081 Q64550 Q68FP2	GO_BP
Cluster3	cellular response to cholesterol	1	38	23	22870	26.17	0.0375	P02650	GO_BP
Cluster3	cellular response to corticosteroid stimulus	2	38	196	22870	6.14	0.042	F1LM05 Q64550	GO_BP
Cluster3	cellular response to cytokine stimulus	2	38	1638	22870	0.73	0.767	F1LM05 P02650	GO_BP
Cluster3	cellular response to drug	2	38	713	22870	1.69	0.333	P02650 Q64550	GO_BP
Cluster3	cellular response to endogenous stimulus	4	38	2194	22870	1.1	0.501	F1LM05 P00388 P24090 Q64550	GO_BP
Cluster3	cellular response to estradiol stimulus	1	38	96	22870	6.27	0.148	Q64550	GO_BP
Cluster3	cellular response to ethanol	2	38	47	22870	25.61	0.00277	P02650 Q64550	GO_BP
Cluster3	cellular response to external stimulus	2	38	635	22870	1.9	0.285	P02706 P02770	GO_BP
Cluster3	cellular response to extracellular stimulus	2	38	487	22870	2.47	0.194	P02706 P02770	GO_BP
Cluster3	cellular response to glucocorticoid stimulus	2	38	178	22870	6.76	0.0353	F1LM05 Q64550	GO_BP
Cluster3	cellular response to gonadotropin stimulus	1	38	73	22870	8.24	0.114	P00388	GO_BP
Cluster3	cellular response to growth factor stimulus	1	38	878	22870	0.69	0.774	P02650	GO_BP
Cluster3	cellular response to hormone stimulus	4	38	1274	22870	1.89	0.159	F1LM05 P00388 P24090 Q64550	GO_BP
Cluster3	cellular response to insulin stimulus	1	38	377	22870	1.6	0.469	P24090	GO_BP
Cluster3	cellular response to interferon-gamma	1	38	309	22870	1.95	0.404	F1LM05	GO_BP
Cluster3	cellular response to interleukin-1	2	38	266	22870	4.53	0.0721	F1LM05 P02650	GO_BP
Cluster3	cellular response to interleukin-6	1	38	89	22870	6.76	0.138	F1LM05	GO_BP
Cluster3	cellular response to lipid	3	38	1005	22870	1.8	0.233	F1LM05 P02650 Q64550	GO_BP
Cluster3	cellular response to misfolded protein	1	38	29	22870	20.75	0.0471	P46462	GO_BP
Cluster3	cellular response to nitrogen compound	3	38	1312	22870	1.38	0.373	F1LM05 P00388 P24090	GO_BP
Cluster3	cellular response to nutrient levels	1	38	436	22870	1.38	0.519	P02770	GO_BP
Cluster3	cellular response to organic cyclic compound	3	38	1038	22870	1.74	0.247	F1LM05 P02650 Q64550	GO_BP
Cluster3	cellular response to organic substance	7	38	3910	22870	1.08	0.48	F1LM05 P00388 P02650 P24090 P46462 Q63081 Q64550	GO_BP
Cluster3	cellular response to organonitrogen compound	3	38	1176	22870	1.54	0.31	F1LM05 P00388 P24090	GO_BP
Cluster3	cellular response to oxygen-containing compound	5	38	1953	22870	1.54	0.221	F1LM05 P00388 P02650 P24090 Q64550	GO_BP
Cluster3	cellular response to peptide	2	38	724	22870	1.66	0.34	P00388 P24090	GO_BP
Cluster3	cellular response to peptide hormone stimulus	2	38	628	22870	1.92	0.28	P00388 P24090	GO_BP
Cluster3	cellular response to starvation	1	38	273	22870	2.2	0.367	P02770	GO_BP
Cluster3	cellular response to steroid hormone stimulus	2	38	382	22870	3.15	0.132	F1LM05 Q64550	GO_BP
Cluster3	cellular response to sterol	1	38	29	22870	20.75	0.0471	P02650	GO_BP
Cluster3	cellular response to stimulus	20	38	9488	22870	1.27	0.11	A0A096MJW5 F1LM05 G3V635 P00388 P02650 P02706 P02770 P05183 P08683 P13107 P16303 P24090 P36365 P46462 P51538 Q06884 Q63081 Q64550 Q68FP2 Q9WVB1	GO_BP
Cluster3	cellular response to stress	4	38	2536	22870	0.95	0.621	P02650 P02770 P46462 Q63081	GO_BP
Cluster3	cellular response to toxic substance	3	38	383	22870	4.71	0.0255	P02650 P02770 Q64550	GO_BP
Cluster3	cellular response to unfolded protein	2	38	172	22870	7	0.0331	P46462 Q63081	GO_BP
Cluster3	cellular response to xenobiotic stimulus	11	38	408	22870	16.23	3.98e-11	G3V635 P00388 P05183 P08683 P13107 P16303 P36365 P51538 Q06884 Q64550 Q68FP2	GO_BP
Cluster3	cellular transition metal ion homeostasis	1	38	157	22870	3.83	0.23	G3V7K3	GO_BP
Cluster3	central nervous system development	3	38	1755	22870	1.03	0.566	P02650 P24090 Q3KR94	GO_BP
Cluster3	cerebral cortex development	1	38	227	22870	2.65	0.316	P24090	GO_BP
Cluster3	chemical homeostasis	2	38	1895	22870	0.64	0.835	G3V7K3 P02650	GO_BP
Cluster3	chemical synaptic transmission	1	38	737	22870	0.82	0.712	P02650	GO_BP
Cluster3	cholesterol biosynthetic process	2	38	68	22870	17.7	0.00572	P02650 P16303	GO_BP
Cluster3	cholesterol catabolic process	1	38	22	22870	27.36	0.0359	P02650	GO_BP
Cluster3	cholesterol efflux	1	38	48	22870	12.54	0.0768	P02650	GO_BP
Cluster3	cholesterol homeostasis	1	38	139	22870	4.33	0.207	P02650	GO_BP
Cluster3	cholesterol metabolic process	3	38	166	22870	10.88	0.00263	P02650 P16303 P55159	GO_BP
Cluster3	cholesterol transport	2	38	108	22870	11.15	0.0139	P02650 P16303	GO_BP
Cluster3	chordate embryonic development	1	38	1113	22870	0.54	0.85	Q09325	GO_BP
Cluster3	chylomicron assembly	1	38	15	22870	40.12	0.0246	P02650	GO_BP
Cluster3	chylomicron remnant clearance	1	38	17	22870	35.4	0.0279	P02650	GO_BP
Cluster3	chylomicron remodeling	1	38	16	22870	37.62	0.0263	P02650	GO_BP
Cluster3	circulatory system development	1	38	1428	22870	0.42	0.914	P02650	GO_BP
Cluster3	circulatory system process	3	38	775	22870	2.33	0.137	P02650 P02770 P55159	GO_BP
Cluster3	coagulation	1	38	408	22870	1.48	0.496	Q63081	GO_BP
Cluster3	coenzyme catabolic process	1	38	29	22870	20.75	0.0471	P46462	GO_BP
Cluster3	coenzyme metabolic process	3	38	550	22870	3.28	0.0628	P16303 P36365 P46462	GO_BP
Cluster3	cofactor catabolic process	2	38	86	22870	14	0.009	P46462 Q64550	GO_BP
Cluster3	cofactor metabolic process	4	38	832	22870	2.89	0.0483	P16303 P36365 P46462 Q64550	GO_BP
Cluster3	cognition	1	38	603	22870	1	0.638	P02650	GO_BP
Cluster3	copper ion transmembrane transport	1	38	18	22870	33.44	0.0295	G3V7K3	GO_BP
Cluster3	copper ion transport	1	38	31	22870	19.41	0.0503	G3V7K3	GO_BP
Cluster3	coumarin catabolic process	1	38	9	22870	66.87	0.0149	Q68FP2	GO_BP
Cluster3	coumarin metabolic process	2	38	18	22870	66.87	0.000404	Q64550 Q68FP2	GO_BP
Cluster3	cyclic-nucleotide-mediated signaling	1	38	215	22870	2.8	0.302	P02650	GO_BP
Cluster3	cytokine production	1	38	243	22870	2.48	0.334	Q6NYB7	GO_BP
Cluster3	cytokine secretion	1	38	77	22870	7.82	0.12	Q6NYB7	GO_BP
Cluster3	cytolysis	1	38	35	22870	17.2	0.0566	P02770	GO_BP
Cluster3	cytolysis by symbiont of host cells	1	38	4	22870	150.46	0.00663	P02770	GO_BP
Cluster3	cytolysis in other organism	1	38	24	22870	25.08	0.0391	P02770	GO_BP
Cluster3	cytoskeleton organization	1	38	1605	22870	0.37	0.937	P02650	GO_BP
Cluster3	cytoskeleton-dependent intracellular transport	2	38	260	22870	4.63	0.0693	Q6NYB7 Q9WVB1	GO_BP
Cluster3	cytosolic transport	2	38	190	22870	6.34	0.0397	P16303 Q9WVB1	GO_BP
Cluster3	defense response	6	38	1753	22870	2.06	0.0673	D4A6E3 F1LM05 P14046 P24090 Q64550 Q6NYB7	GO_BP
Cluster3	defense response to bacterium	1	38	427	22870	1.41	0.512	Q6NYB7	GO_BP
Cluster3	defense response to other organism	1	38	642	22870	0.94	0.661	Q6NYB7	GO_BP
Cluster3	demethylation	5	38	107	22870	28.12	9.06e-07	G3V635 P00388 P05183 P51538 Q06884	GO_BP
Cluster3	dephosphorylation	1	38	417	22870	1.44	0.503	P55159	GO_BP
Cluster3	detoxification	3	38	146	22870	12.37	0.00183	P02650 P02770 Q68FP2	GO_BP
Cluster3	development of primary male sexual characteristics	1	38	300	22870	2.01	0.395	P24090	GO_BP
Cluster3	development of primary sexual characteristics	1	38	478	22870	1.26	0.552	P24090	GO_BP
Cluster3	developmental process	18	38	8750	22870	1.24	0.161	D3ZR49 D4A6E3 G3V635 G3V7K3 G3V8G5 O35913 P02650 P05183 P13107 P14046 P16303 P24090 Q06884 Q09325 Q3KR94 Q63041 Q64550 Q6NYB7	GO_BP
Cluster3	developmental process involved in reproduction	1	38	1212	22870	0.5	0.874	P24090	GO_BP
Cluster3	dicarboxylic acid transport	1	38	110	22870	5.47	0.168	O35913	GO_BP
Cluster3	digestion	2	38	223	22870	5.4	0.0529	F1LM05 O35913	GO_BP
Cluster3	digestive system process	2	38	161	22870	7.48	0.0293	F1LM05 O35913	GO_BP
Cluster3	disruption by symbiont of host cell	1	38	37	22870	16.27	0.0597	P02770	GO_BP
Cluster3	disruption of cells of other organism	1	38	145	22870	4.15	0.215	P02770	GO_BP
Cluster3	diterpenoid metabolic process	2	38	144	22870	8.36	0.0239	P02650 Q64550	GO_BP
Cluster3	divalent inorganic cation homeostasis	1	38	832	22870	0.72	0.756	P02650	GO_BP
Cluster3	dolichol metabolic process	1	38	13	22870	46.3	0.0214	D4A8N1	GO_BP
Cluster3	double-strand break repair	1	38	226	22870	2.66	0.315	P46462	GO_BP
Cluster3	drug catabolic process	6	38	215	22870	16.8	1.38e-06	G3V635 P00388 P05183 P13107 P51538 Q06884	GO_BP
Cluster3	drug metabolic process	9	38	1114	22870	4.86	6.77e-05	G3V635 P00388 P05183 P13107 P36365 P46462 P51538 Q06884 Q64550	GO_BP
Cluster3	drug transmembrane transport	1	38	179	22870	3.36	0.258	O35913	GO_BP
Cluster3	drug transport	1	38	267	22870	2.25	0.36	O35913	GO_BP
Cluster3	early endosome to Golgi transport	1	38	10	22870	60.18	0.0165	Q9WVB1	GO_BP
Cluster3	electron transport chain	1	38	232	22870	2.59	0.321	P00388	GO_BP
Cluster3	embryo development	2	38	1688	22870	0.71	0.782	Q09325 Q3KR94	GO_BP
Cluster3	embryo development ending in birth or egg hatching	1	38	1149	22870	0.52	0.859	Q09325	GO_BP
Cluster3	embryo implantation	3	38	129	22870	14	0.00128	D4A6E3 P14046 Q63041	GO_BP
Cluster3	embryonic morphogenesis	1	38	934	22870	0.64	0.795	Q3KR94	GO_BP
Cluster3	endocytosis	6	38	746	22870	4.84	0.00134	P02650 P02706 P02770 P24090 Q63081 Q6NYB7	GO_BP
Cluster3	endoderm development	1	38	128	22870	4.7	0.192	Q3KR94	GO_BP
Cluster3	endoderm formation	1	38	76	22870	7.92	0.119	Q3KR94	GO_BP
Cluster3	endodermal cell differentiation	1	38	59	22870	10.2	0.0936	Q3KR94	GO_BP
Cluster3	endomembrane system organization	2	38	526	22870	2.29	0.217	Q6AXN3 Q6NYB7	GO_BP
Cluster3	endoplasmic reticulum to cytosol transport	1	38	28	22870	21.49	0.0455	P46462	GO_BP
Cluster3	endoplasmic reticulum unfolded protein response	2	38	147	22870	8.19	0.0248	P46462 Q63081	GO_BP
Cluster3	endosomal transport	2	38	285	22870	4.22	0.0812	P46462 Q9WVB1	GO_BP
Cluster3	endosome to lysosome transport	1	38	75	22870	8.02	0.117	P46462	GO_BP
Cluster3	epithelial cell differentiation	1	38	964	22870	0.62	0.806	P16303	GO_BP
Cluster3	epithelial structure maintenance	1	38	52	22870	11.57	0.0829	F1LM05	GO_BP
Cluster3	epithelium development	1	38	1763	22870	0.34	0.953	P16303	GO_BP
Cluster3	epoxygenase P450 pathway	2	38	75	22870	16.05	0.00691	P08683 P13107	GO_BP
Cluster3	error-free translesion synthesis	1	38	23	22870	26.17	0.0375	P46462	GO_BP
Cluster3	establishment of localization	15	38	6266	22870	1.44	0.0718	B0BNG3 F1LM05 G3V7K3 G3V8G5 M0R890 O35913 P02650 P02706 P02770 P16303 P24090 P46462 Q63081 Q6NYB7 Q9WVB1	GO_BP
Cluster3	establishment of localization in cell	6	38	2507	22870	1.44	0.233	G3V8G5 P02650 P16303 P46462 Q6NYB7 Q9WVB1	GO_BP
Cluster3	establishment of melanosome localization	1	38	35	22870	17.2	0.0566	Q6NYB7	GO_BP
Cluster3	establishment of organelle localization	2	38	649	22870	1.85	0.293	Q6NYB7 Q9WVB1	GO_BP
Cluster3	establishment of pigment granule localization	1	38	36	22870	16.72	0.0582	Q6NYB7	GO_BP
Cluster3	establishment of protein localization	5	38	1676	22870	1.8	0.142	G3V8G5 P02650 P46462 Q6NYB7 Q9WVB1	GO_BP
Cluster3	establishment of vesicle localization	1	38	384	22870	1.57	0.475	Q6NYB7	GO_BP
Cluster3	estrogen metabolic process	1	38	44	22870	13.68	0.0706	Q64550	GO_BP
Cluster3	exocytosis	5	38	1144	22870	2.63	0.0397	F1LM05 P02770 P24090 P46462 Q9WVB1	GO_BP
Cluster3	exogenous drug catabolic process	5	38	53	22870	56.78	2.61e-08	G3V635 P05183 P13107 P51538 Q06884	GO_BP
Cluster3	exploration behavior	1	38	61	22870	9.87	0.0966	P02650	GO_BP
Cluster3	extracellular matrix organization	1	38	490	22870	1.23	0.561	Q3KR94	GO_BP
Cluster3	extracellular structure organization	4	38	560	22870	4.3	0.0136	P02650 P02770 P16303 Q3KR94	GO_BP
Cluster3	fat-soluble vitamin biosynthetic process	4	38	23	22870	104.67	5.61e-08	G3V635 P05183 P51538 Q06884	GO_BP
Cluster3	fat-soluble vitamin metabolic process	4	38	63	22870	38.21	3.6e-06	G3V635 P05183 P51538 Q06884	GO_BP
Cluster3	fatty acid biosynthetic process	4	38	195	22870	12.35	0.000302	G3V635 P05183 P51538 Q06884	GO_BP
Cluster3	fatty acid catabolic process	2	38	172	22870	7	0.0331	P16303 Q64573	GO_BP
Cluster3	fatty acid derivative metabolic process	3	38	339	22870	5.33	0.0186	P08683 P13107 Q68FP2	GO_BP
Cluster3	fatty acid homeostasis	1	38	24	22870	25.08	0.0391	P02650	GO_BP
Cluster3	fatty acid metabolic process	11	38	589	22870	11.24	1.93e-09	G3V635 P00388 P05183 P08683 P13107 P16303 P51538 Q06884 Q64550 Q64573 Q68FP2	GO_BP
Cluster3	fatty acid oxidation	1	38	144	22870	4.18	0.214	P00388	GO_BP
Cluster3	fatty acid transport	1	38	124	22870	4.85	0.187	P02650	GO_BP
Cluster3	female pregnancy	3	38	520	22870	3.47	0.0548	D4A6E3 P14046 Q63041	GO_BP
Cluster3	flavin adenine dinucleotide catabolic process	1	38	1	22870	601.84	0.00166	P46462	GO_BP
Cluster3	flavin adenine dinucleotide metabolic process	1	38	2	22870	300.92	0.00332	P46462	GO_BP
Cluster3	flavin-containing compound catabolic process	1	38	1	22870	601.84	0.00166	P46462	GO_BP
Cluster3	flavin-containing compound metabolic process	1	38	9	22870	66.87	0.0149	P46462	GO_BP
Cluster3	flavone metabolic process	1	38	7	22870	85.98	0.0116	Q64550	GO_BP
Cluster3	flavonoid glucuronidation	1	38	15	22870	40.12	0.0246	Q64550	GO_BP
Cluster3	flavonoid metabolic process	2	38	21	22870	57.32	0.000553	P00388 Q64550	GO_BP
Cluster3	forebrain development	1	38	767	22870	0.78	0.727	P24090	GO_BP
Cluster3	formation of primary germ layer	1	38	170	22870	3.54	0.247	Q3KR94	GO_BP
Cluster3	gastrulation	1	38	246	22870	2.45	0.337	Q3KR94	GO_BP
Cluster3	generation of neurons	1	38	2750	22870	0.22	0.992	P02650	GO_BP
Cluster3	generation of precursor metabolites and energy	1	38	613	22870	0.98	0.644	P00388	GO_BP
Cluster3	gland development	3	38	930	22870	1.94	0.2	G3V7K3 Q3KR94 Q64550	GO_BP
Cluster3	glial cell differentiation	2	38	311	22870	3.87	0.0942	P02650 Q3KR94	GO_BP
Cluster3	gliogenesis	2	38	383	22870	3.14	0.133	P02650 Q3KR94	GO_BP
Cluster3	glucuronate metabolic process	1	38	30	22870	20.06	0.0487	Q64550	GO_BP
Cluster3	glutamate receptor clustering	1	38	18	22870	33.44	0.0295	P02650	GO_BP
Cluster3	glycerolipid biosynthetic process	1	38	347	22870	1.73	0.441	D4A8N1	GO_BP
Cluster3	glycerolipid catabolic process	3	38	97	22870	18.61	0.00056	P02650 P16303 Q64573	GO_BP
Cluster3	glycerolipid metabolic process	5	38	650	22870	4.63	0.00422	D4A8N1 P02650 P16303 P55159 Q64573	GO_BP
Cluster3	glycerophospholipid biosynthetic process	1	38	325	22870	1.85	0.42	D4A8N1	GO_BP
Cluster3	glycerophospholipid metabolic process	2	38	514	22870	2.34	0.21	D4A8N1 P55159	GO_BP
Cluster3	glycolipid biosynthetic process	1	38	82	22870	7.34	0.128	D4A8N1	GO_BP
Cluster3	glycolipid metabolic process	1	38	153	22870	3.93	0.225	D4A8N1	GO_BP
Cluster3	glycoprotein biosynthetic process	4	38	365	22870	6.6	0.00307	D4A8N1 P02706 P46462 Q09325	GO_BP
Cluster3	glycoprotein metabolic process	5	38	467	22870	6.44	0.001	D3ZR49 D4A8N1 P02706 P46462 Q09325	GO_BP
Cluster3	glycosylation	4	38	298	22870	8.08	0.00147	D4A8N1 P02706 P46462 Q09325	GO_BP
Cluster3	gonad development	1	38	471	22870	1.28	0.547	P24090	GO_BP
Cluster3	granulocyte activation	4	38	719	22870	3.35	0.0307	F1LM05 P24090 P46462 Q9WVB1	GO_BP
Cluster3	growth hormone secretion	1	38	22	22870	27.36	0.0359	Q6NYB7	GO_BP
Cluster3	head development	1	38	1437	22870	0.42	0.915	P24090	GO_BP
Cluster3	heme catabolic process	1	38	13	22870	46.3	0.0214	Q64550	GO_BP
Cluster3	heme metabolic process	1	38	58	22870	10.38	0.0921	Q64550	GO_BP
Cluster3	hemolysis by symbiont of host erythrocytes	1	38	4	22870	150.46	0.00663	P02770	GO_BP
Cluster3	hemolysis in other organism	1	38	4	22870	150.46	0.00663	P02770	GO_BP
Cluster3	hemostasis	1	38	416	22870	1.45	0.502	Q63081	GO_BP
Cluster3	hepaticobiliary system development	3	38	346	22870	5.22	0.0196	G3V7K3 Q3KR94 Q64550	GO_BP
Cluster3	heterocycle biosynthetic process	1	38	2125	22870	0.28	0.975	P46462	GO_BP
Cluster3	heterocycle catabolic process	4	38	656	22870	3.67	0.0229	P46462 Q09325 Q64550 Q68FP2	GO_BP
Cluster3	heterocycle metabolic process	11	38	4678	22870	1.42	0.137	D4A8N1 G3V635 P05183 P16303 P36365 P46462 P51538 Q06884 Q09325 Q64550 Q68FP2	GO_BP
Cluster3	high-density lipoprotein particle assembly	1	38	15	22870	40.12	0.0246	P02650	GO_BP
Cluster3	high-density lipoprotein particle clearance	1	38	15	22870	40.12	0.0246	P02650	GO_BP
Cluster3	high-density lipoprotein particle remodeling	2	38	30	22870	40.12	0.00114	P02650 P02770	GO_BP
Cluster3	homeostatic process	3	38	2703	22870	0.67	0.843	F1LM05 G3V7K3 P02650	GO_BP
Cluster3	homotypic cell-cell adhesion	1	38	69	22870	8.72	0.109	Q63081	GO_BP
Cluster3	hormone biosynthetic process	4	38	115	22870	20.93	3.92e-05	G3V635 P05183 P51538 Q06884	GO_BP
Cluster3	hormone catabolic process	1	38	40	22870	15.05	0.0644	Q68FP2	GO_BP
Cluster3	hormone metabolic process	6	38	342	22870	10.56	1.97e-05	G3V635 P05183 P51538 Q06884 Q64550 Q68FP2	GO_BP
Cluster3	hormone secretion	1	38	211	22870	2.85	0.297	Q6NYB7	GO_BP
Cluster3	hormone transport	2	38	239	22870	5.04	0.0598	O35913 Q6NYB7	GO_BP
Cluster3	icosanoid metabolic process	3	38	258	22870	7	0.00895	P08683 P13107 Q68FP2	GO_BP
Cluster3	immune effector process	4	38	1320	22870	1.82	0.174	F1LM05 P24090 P46462 Q9WVB1	GO_BP
Cluster3	immune response	5	38	2036	22870	1.48	0.247	F1LM05 P24090 P46462 Q3KR94 Q9WVB1	GO_BP
Cluster3	immune system process	6	38	3481	22870	1.04	0.53	F1LM05 G3V8G5 P24090 P46462 Q3KR94 Q9WVB1	GO_BP
Cluster3	import into cell	6	38	859	22870	4.2	0.00272	P02650 P02706 P02770 P24090 Q63081 Q6NYB7	GO_BP
Cluster3	in utero embryonic development	1	38	705	22870	0.85	0.696	Q09325	GO_BP
Cluster3	inclusion body assembly	1	38	21	22870	28.66	0.0343	P46462	GO_BP
Cluster3	inflammatory response	5	38	710	22870	4.24	0.00611	D4A6E3 F1LM05 P14046 P24090 Q64550	GO_BP
Cluster3	innate immune response	1	38	793	22870	0.76	0.739	F1LM05	GO_BP
Cluster3	inorganic cation transmembrane transport	1	38	1003	22870	0.6	0.818	G3V7K3	GO_BP
Cluster3	inorganic ion homeostasis	2	38	1203	22870	1	0.601	G3V7K3 P02650	GO_BP
Cluster3	inorganic ion transmembrane transport	1	38	1129	22870	0.53	0.854	G3V7K3	GO_BP
Cluster3	inositol lipid-mediated signaling	1	38	126	22870	4.78	0.19	A0A096MJW5	GO_BP
Cluster3	inositol phosphate metabolic process	1	38	100	22870	6.02	0.154	A0A096MJW5	GO_BP
Cluster3	interaction with host	1	38	232	22870	2.59	0.321	P02770	GO_BP
Cluster3	interaction with symbiont	1	38	164	22870	3.67	0.239	P02650	GO_BP
Cluster3	interleukin-8 production	1	38	11	22870	54.71	0.0181	Q6NYB7	GO_BP
Cluster3	interleukin-8 secretion	1	38	8	22870	75.23	0.0132	Q6NYB7	GO_BP
Cluster3	internal peptidyl-lysine acetylation	1	38	165	22870	3.65	0.241	P00388	GO_BP
Cluster3	internal protein amino acid acetylation	1	38	175	22870	3.44	0.253	P00388	GO_BP
Cluster3	interspecies interaction between organisms	4	38	644	22870	3.74	0.0216	P02650 P02770 P46462 Q6NYB7	GO_BP
Cluster3	intestinal absorption	1	38	72	22870	8.36	0.113	O35913	GO_BP
Cluster3	intra-Golgi vesicle-mediated transport	1	38	46	22870	13.08	0.0737	Q9WVB1	GO_BP
Cluster3	intracellular cholesterol transport	1	38	20	22870	30.09	0.0327	P16303	GO_BP
Cluster3	intracellular lipid transport	1	38	39	22870	15.43	0.0628	P16303	GO_BP
Cluster3	intracellular protein transport	4	38	1105	22870	2.18	0.11	G3V8G5 P46462 Q6NYB7 Q9WVB1	GO_BP
Cluster3	intracellular signal transduction	3	38	2366	22870	0.76	0.768	A0A096MJW5 P02650 Q9WVB1	GO_BP
Cluster3	intracellular sterol transport	1	38	21	22870	28.66	0.0343	P16303	GO_BP
Cluster3	intracellular transport	6	38	2105	22870	1.72	0.132	G3V8G5 P02650 P16303 P46462 Q6NYB7 Q9WVB1	GO_BP
Cluster3	ion homeostasis	2	38	1302	22870	0.92	0.645	G3V7K3 P02650	GO_BP
Cluster3	ion transmembrane transport	2	38	1582	22870	0.76	0.749	G3V7K3 O35913	GO_BP
Cluster3	ion transport	3	38	2084	22870	0.87	0.686	G3V7K3 O35913 P02650	GO_BP
Cluster3	iron ion homeostasis	1	38	142	22870	4.24	0.211	G3V7K3	GO_BP
Cluster3	isoprenoid metabolic process	7	38	215	22870	19.59	5.8e-08	D4A8N1 G3V635 P02650 P05183 P51538 Q06884 Q64550	GO_BP
Cluster3	killing by symbiont of host cells	1	38	37	22870	16.27	0.0597	P02770	GO_BP
Cluster3	killing of cells of other organism	1	38	145	22870	4.15	0.215	P02770	GO_BP
Cluster3	learning or memory	1	38	549	22870	1.1	0.603	P02650	GO_BP
Cluster3	leukocyte activation	4	38	1426	22870	1.69	0.21	F1LM05 P24090 P46462 Q9WVB1	GO_BP
Cluster3	leukocyte activation involved in immune response	4	38	895	22870	2.69	0.0601	F1LM05 P24090 P46462 Q9WVB1	GO_BP
Cluster3	leukocyte degranulation	4	38	729	22870	3.3	0.0321	F1LM05 P24090 P46462 Q9WVB1	GO_BP
Cluster3	leukocyte mediated immunity	4	38	954	22870	2.52	0.0725	F1LM05 P24090 P46462 Q9WVB1	GO_BP
Cluster3	leukocyte migration	1	38	461	22870	1.31	0.539	G3V8G5	GO_BP
Cluster3	lipid biosynthetic process	7	38	897	22870	4.7	0.000607	D4A8N1 G3V635 P02650 P05183 P16303 P51538 Q06884	GO_BP
Cluster3	lipid catabolic process	7	38	401	22870	10.51	3.82e-06	G3V635 P02650 P05183 P16303 P51538 Q06884 Q64573	GO_BP
Cluster3	lipid homeostasis	1	38	203	22870	2.96	0.288	P02650	GO_BP
Cluster3	lipid hydroxylation	4	38	33	22870	72.95	2.56e-07	G3V635 P05183 P51538 Q06884	GO_BP
Cluster3	lipid localization	4	38	463	22870	5.2	0.0071	M0R890 O35913 P02650 P16303	GO_BP
Cluster3	lipid metabolic process	14	38	1854	22870	4.54	7.57e-07	D4A8N1 G3V635 P00388 P02650 P05183 P08683 P13107 P16303 P51538 P55159 Q06884 Q64550 Q64573 Q68FP2	GO_BP
Cluster3	lipid modification	5	38	430	22870	7	0.000691	G3V635 P00388 P05183 P51538 Q06884	GO_BP
Cluster3	lipid oxidation	1	38	145	22870	4.15	0.215	P00388	GO_BP
Cluster3	lipid storage	1	38	59	22870	10.2	0.0936	P02650	GO_BP
Cluster3	lipid transport	4	38	421	22870	5.72	0.0051	M0R890 O35913 P02650 P16303	GO_BP
Cluster3	lipid transport involved in lipid storage	1	38	3	22870	200.61	0.00498	P02650	GO_BP
Cluster3	lipoprotein biosynthetic process	2	38	114	22870	10.56	0.0154	D4A8N1 P02650	GO_BP
Cluster3	lipoprotein catabolic process	1	38	19	22870	31.68	0.0311	P02650	GO_BP
Cluster3	lipoprotein metabolic process	2	38	142	22870	8.48	0.0233	D4A8N1 P02650	GO_BP
Cluster3	liposaccharide metabolic process	1	38	154	22870	3.91	0.227	D4A8N1	GO_BP
Cluster3	lipoxygenase pathway	1	38	23	22870	26.17	0.0375	Q68FP2	GO_BP
Cluster3	liver development	3	38	342	22870	5.28	0.019	G3V7K3 Q3KR94 Q64550	GO_BP
Cluster3	liver regeneration	1	38	100	22870	6.02	0.154	Q3KR94	GO_BP
Cluster3	localization	16	38	7927	22870	1.21	0.212	B0BNG3 F1LM05 G3V7K3 G3V8G5 M0R890 O35913 P02650 P02706 P02770 P16303 P24090 P46462 Q3KR94 Q63081 Q6NYB7 Q9WVB1	GO_BP
Cluster3	localization of cell	3	38	1550	22870	1.16	0.481	G3V8G5 Q3KR94 Q6NYB7	GO_BP
Cluster3	localization within membrane	2	38	197	22870	6.11	0.0424	P02650 Q6NYB7	GO_BP
Cluster3	locomotion	3	38	1924	22870	0.94	0.631	G3V8G5 Q3KR94 Q6NYB7	GO_BP
Cluster3	locomotory behavior	1	38	386	22870	1.56	0.477	P02650	GO_BP
Cluster3	locomotory exploration behavior	1	38	36	22870	16.72	0.0582	P02650	GO_BP
Cluster3	long-chain fatty acid biosynthetic process	4	38	71	22870	33.91	5.81e-06	G3V635 P05183 P51538 Q06884	GO_BP
Cluster3	long-chain fatty acid metabolic process	6	38	255	22870	14.16	3.71e-06	G3V635 P05183 P08683 P13107 P51538 Q06884	GO_BP
Cluster3	long-chain fatty acid transport	1	38	96	22870	6.27	0.148	P02650	GO_BP
Cluster3	long-term memory	1	38	73	22870	8.24	0.114	P02650	GO_BP
Cluster3	low-density lipoprotein particle remodeling	1	38	20	22870	30.09	0.0327	P02650	GO_BP
Cluster3	lung alveolus development	1	38	97	22870	6.2	0.149	D3ZR49	GO_BP
Cluster3	lung development	2	38	348	22870	3.46	0.114	D3ZR49 G3V7K3	GO_BP
Cluster3	lysosomal transport	1	38	145	22870	4.15	0.215	P46462	GO_BP
Cluster3	macroautophagy	2	38	187	22870	6.44	0.0386	P46462 Q6NYB7	GO_BP
Cluster3	macromolecular complex assembly	6	38	2356	22870	1.53	0.192	P02650 P16303 P24090 P46462 Q3KR94 Q6NYB7	GO_BP
Cluster3	macromolecular complex disassembly	1	38	311	22870	1.94	0.406	P46462	GO_BP
Cluster3	macromolecular complex remodeling	2	38	44	22870	27.36	0.00243	P02650 P02770	GO_BP
Cluster3	macromolecular complex subunit organization	7	38	2735	22870	1.54	0.162	P02650 P02770 P16303 P24090 P46462 Q3KR94 Q6NYB7	GO_BP
Cluster3	macromolecule biosynthetic process	5	38	2809	22870	1.07	0.508	D4A8N1 P02650 P02706 P46462 Q09325	GO_BP
Cluster3	macromolecule catabolic process	2	38	1261	22870	0.95	0.627	P02650 P46462	GO_BP
Cluster3	macromolecule glycosylation	4	38	275	22870	8.75	0.00109	D4A8N1 P02706 P46462 Q09325	GO_BP
Cluster3	macromolecule localization	8	38	3092	22870	1.56	0.133	G3V8G5 M0R890 O35913 P02650 P16303 P46462 Q6NYB7 Q9WVB1	GO_BP
Cluster3	macromolecule metabolic process	13	38	8752	22870	0.89	0.75	D3ZR49 D4A8N1 P00388 P02650 P02706 P02770 P24090 P46462 Q09325 Q63081 Q63083 Q6NYB7 Q9WVB1	GO_BP
Cluster3	macromolecule methylation	1	38	318	22870	1.89	0.413	Q9WVB1	GO_BP
Cluster3	macromolecule modification	13	38	4423	22870	1.77	0.0222	D3ZR49 D4A8N1 P00388 P02650 P02706 P02770 P24090 P46462 Q09325 Q63081 Q63083 Q6NYB7 Q9WVB1	GO_BP
Cluster3	maintenance of gastrointestinal epithelium	1	38	42	22870	14.33	0.0675	F1LM05	GO_BP
Cluster3	maintenance of location	2	38	270	22870	4.46	0.074	P02650 P02770	GO_BP
Cluster3	maintenance of location in cell	2	38	143	22870	8.42	0.0236	P02650 P02770	GO_BP
Cluster3	maintenance of mitochondrion location	1	38	4	22870	150.46	0.00663	P02770	GO_BP
Cluster3	maintenance of organelle location	1	38	15	22870	40.12	0.0246	P02770	GO_BP
Cluster3	male gonad development	1	38	299	22870	2.01	0.394	P24090	GO_BP
Cluster3	male sex differentiation	1	38	335	22870	1.8	0.429	P24090	GO_BP
Cluster3	mannosylation	1	38	36	22870	16.72	0.0582	D4A8N1	GO_BP
Cluster3	medium-chain fatty acid metabolic process	1	38	24	22870	25.08	0.0391	P16303	GO_BP
Cluster3	melanosome localization	1	38	39	22870	15.43	0.0628	Q6NYB7	GO_BP
[truncated: 3,766 more rows]

## Sheet: GO.cc enrich
Supporting information Table 4. Cell component enrichment analysis based on dynamic clustering by different categories.
Cluster	Terms	Mapping	All.mapping	Background	All.background	Fold.enrich	p.value	Protein.IDs	Type
Cluster1	adherens junction	1	3	434	23120	17.76	0.0553	Q9Z1E1	GO_CC
Cluster1	anchoring junction	1	3	452	23120	17.05	0.0575	Q9Z1E1	GO_CC
Cluster1	apical part of cell	1	3	756	23120	10.19	0.0949	Q9Z1E1	GO_CC
Cluster1	azurophil granule	1	3	232	23120	33.22	0.0298	Q3MIE4	GO_CC
Cluster1	azurophil granule lumen	1	3	148	23120	52.07	0.0191	Q3MIE4	GO_CC
Cluster1	basolateral plasma membrane	1	3	459	23120	16.79	0.0584	Q9Z1E1	GO_CC
Cluster1	bounding membrane of organelle	1	3	2525	23120	3.05	0.293	Q3MIE4	GO_CC
Cluster1	caveola	1	3	164	23120	46.99	0.0211	Q9Z1E1	GO_CC
Cluster1	cell	3	3	22194	23120	1.04	0.885	P51869 Q3MIE4 Q9Z1E1	GO_CC
Cluster1	cell junction	1	3	1093	23120	7.05	0.135	Q9Z1E1	GO_CC
Cluster1	cell leading edge	1	3	668	23120	11.54	0.0842	Q9Z1E1	GO_CC
Cluster1	cell part	3	3	22192	23120	1.04	0.884	P51869 Q3MIE4 Q9Z1E1	GO_CC
Cluster1	cell periphery	1	3	7854	23120	0.98	0.712	Q9Z1E1	GO_CC
Cluster1	cell projection	1	3	3626	23120	2.13	0.401	Q9Z1E1	GO_CC
Cluster1	cell trailing edge	1	3	29	23120	265.75	0.00376	Q9Z1E1	GO_CC
Cluster1	cell-cell adherens junction	1	3	146	23120	52.79	0.0188	Q9Z1E1	GO_CC
Cluster1	cell-cell contact zone	1	3	135	23120	57.09	0.0174	Q9Z1E1	GO_CC
Cluster1	cell-cell junction	1	3	697	23120	11.06	0.0877	Q9Z1E1	GO_CC
Cluster1	centriolar satellite	1	3	45	23120	171.26	0.00583	Q9Z1E1	GO_CC
Cluster1	centrosome	1	3	716	23120	10.76	0.0901	Q9Z1E1	GO_CC
Cluster1	cytoplasm	3	3	16001	23120	1.44	0.331	P51869 Q3MIE4 Q9Z1E1	GO_CC
Cluster1	cytoplasmic part	3	3	13935	23120	1.66	0.219	P51869 Q3MIE4 Q9Z1E1	GO_CC
Cluster1	cytoplasmic vesicle	2	3	3343	23120	4.61	0.0567	Q3MIE4 Q9Z1E1	GO_CC
Cluster1	cytoplasmic vesicle lumen	1	3	513	23120	15.02	0.0651	Q3MIE4	GO_CC
Cluster1	cytoplasmic vesicle part	1	3	1929	23120	4	0.23	Q3MIE4	GO_CC
Cluster1	cytoskeletal part	1	3	2092	23120	3.68	0.248	Q9Z1E1	GO_CC
Cluster1	cytoskeleton	1	3	2763	23120	2.79	0.317	Q9Z1E1	GO_CC
Cluster1	early endosome	1	3	433	23120	17.8	0.0551	Q9Z1E1	GO_CC
Cluster1	endomembrane system	3	3	6551	23120	3.53	0.0227	P51869 Q3MIE4 Q9Z1E1	GO_CC
Cluster1	endoplasmic reticulum	1	3	2777	23120	2.78	0.319	P51869	GO_CC
Cluster1	endoplasmic reticulum membrane	1	3	1402	23120	5.5	0.171	P51869	GO_CC
Cluster1	endoplasmic reticulum part	1	3	1887	23120	4.08	0.225	P51869	GO_CC
Cluster1	endoplasmic reticulum subcompartment	1	3	1420	23120	5.43	0.173	P51869	GO_CC
Cluster1	endosome	1	3	1306	23120	5.9	0.16	Q9Z1E1	GO_CC
Cluster1	envelope	1	3	1668	23120	4.62	0.201	Q3MIE4	GO_CC
Cluster1	extracellular region	1	3	3362	23120	2.29	0.376	Q3MIE4	GO_CC
Cluster1	flotillin complex	1	3	13	23120	592.82	0.00169	Q9Z1E1	GO_CC
Cluster1	integral component of membrane	1	3	4152	23120	1.86	0.448	Q3MIE4	GO_CC
Cluster1	intracellular	3	3	19286	23120	1.2	0.58	P51869 Q3MIE4 Q9Z1E1	GO_CC
Cluster1	intracellular membrane-bounded organelle	2	3	14035	23120	1.1	0.658	P51869 Q3MIE4	GO_CC
Cluster1	intracellular non-membrane-bounded organelle	1	3	5595	23120	1.38	0.564	Q9Z1E1	GO_CC
Cluster1	intracellular organelle	3	3	16534	23120	1.4	0.366	P51869 Q3MIE4 Q9Z1E1	GO_CC
Cluster1	intracellular organelle lumen	1	3	7436	23120	1.04	0.688	Q3MIE4	GO_CC
Cluster1	intracellular organelle part	3	3	12485	23120	1.85	0.157	P51869 Q3MIE4 Q9Z1E1	GO_CC
Cluster1	intracellular part	3	3	19175	23120	1.21	0.57	P51869 Q3MIE4 Q9Z1E1	GO_CC
Cluster1	intracellular vesicle	2	3	3355	23120	4.59	0.0571	Q3MIE4 Q9Z1E1	GO_CC
Cluster1	intrinsic component of membrane	1	3	4327	23120	1.78	0.463	Q3MIE4	GO_CC
Cluster1	lamellipodium	1	3	317	23120	24.31	0.0406	Q9Z1E1	GO_CC
Cluster1	lysosome	1	3	861	23120	8.95	0.108	Q3MIE4	GO_CC
Cluster1	lytic vacuole	1	3	861	23120	8.95	0.108	Q3MIE4	GO_CC
Cluster1	macromolecular complex	1	3	7260	23120	1.06	0.677	Q9Z1E1	GO_CC
Cluster1	membrane	3	3	11118	23120	2.08	0.111	P51869 Q3MIE4 Q9Z1E1	GO_CC
Cluster1	membrane microdomain	1	3	654	23120	11.78	0.0825	Q9Z1E1	GO_CC
Cluster1	membrane part	3	3	7202	23120	3.21	0.0302	P51869 Q3MIE4 Q9Z1E1	GO_CC
Cluster1	membrane protein complex	1	3	1489	23120	5.18	0.181	Q9Z1E1	GO_CC
Cluster1	membrane raft	1	3	654	23120	11.78	0.0825	Q9Z1E1	GO_CC
Cluster1	membrane region	1	3	676	23120	11.4	0.0852	Q9Z1E1	GO_CC
Cluster1	membrane-bounded organelle	3	3	15308	23120	1.51	0.29	P51869 Q3MIE4 Q9Z1E1	GO_CC
Cluster1	membrane-enclosed lumen	1	3	7443	23120	1.04	0.688	Q3MIE4	GO_CC
Cluster1	microtubule cytoskeleton	1	3	1640	23120	4.7	0.198	Q9Z1E1	GO_CC
Cluster1	microtubule organizing center	1	3	977	23120	7.89	0.121	Q9Z1E1	GO_CC
Cluster1	microtubule organizing center part	1	3	238	23120	32.38	0.0306	Q9Z1E1	GO_CC
Cluster1	mitochondrial envelope	1	3	978	23120	7.88	0.122	Q3MIE4	GO_CC
Cluster1	mitochondrial membrane	1	3	886	23120	8.7	0.111	Q3MIE4	GO_CC
Cluster1	mitochondrial outer membrane	1	3	245	23120	31.46	0.0315	Q3MIE4	GO_CC
Cluster1	mitochondrial part	1	3	1374	23120	5.61	0.168	Q3MIE4	GO_CC
Cluster1	mitochondrion	1	3	2156	23120	3.57	0.254	Q3MIE4	GO_CC
Cluster1	non-membrane-bounded organelle	1	3	5595	23120	1.38	0.564	Q9Z1E1	GO_CC
Cluster1	organelle	3	3	16911	23120	1.37	0.391	P51869 Q3MIE4 Q9Z1E1	GO_CC
Cluster1	organelle envelope	1	3	1667	23120	4.62	0.201	Q3MIE4	GO_CC
Cluster1	organelle lumen	1	3	7443	23120	1.04	0.688	Q3MIE4	GO_CC
Cluster1	organelle membrane	2	3	3708	23120	4.16	0.0689	P51869 Q3MIE4	GO_CC
Cluster1	organelle outer membrane	1	3	290	23120	26.57	0.0372	Q3MIE4	GO_CC
Cluster1	organelle part	3	3	12887	23120	1.79	0.173	P51869 Q3MIE4 Q9Z1E1	GO_CC
Cluster1	organelle subcompartment	1	3	2202	23120	3.5	0.259	P51869	GO_CC
Cluster1	outer membrane	1	3	296	23120	26.04	0.0379	Q3MIE4	GO_CC
Cluster1	plasma membrane	1	3	7649	23120	1.01	0.7	Q9Z1E1	GO_CC
Cluster1	plasma membrane part	1	3	4286	23120	1.8	0.459	Q9Z1E1	GO_CC
Cluster1	plasma membrane protein complex	1	3	803	23120	9.6	0.101	Q9Z1E1	GO_CC
Cluster1	plasma membrane raft	1	3	201	23120	38.34	0.0259	Q9Z1E1	GO_CC
Cluster1	plasma membrane region	1	3	1775	23120	4.34	0.213	Q9Z1E1	GO_CC
Cluster1	primary lysosome	1	3	232	23120	33.22	0.0298	Q3MIE4	GO_CC
Cluster1	sarcolemma	1	3	297	23120	25.95	0.038	Q9Z1E1	GO_CC
Cluster1	secretory granule	1	3	1407	23120	5.48	0.172	Q3MIE4	GO_CC
Cluster1	secretory granule lumen	1	3	487	23120	15.82	0.0619	Q3MIE4	GO_CC
Cluster1	secretory vesicle	1	3	1691	23120	4.56	0.204	Q3MIE4	GO_CC
Cluster1	uropod	1	3	29	23120	265.75	0.00376	Q9Z1E1	GO_CC
Cluster1	vacuolar lumen	1	3	273	23120	28.23	0.035	Q3MIE4	GO_CC
Cluster1	vacuolar part	1	3	629	23120	12.25	0.0794	Q3MIE4	GO_CC
Cluster1	vacuole	1	3	1004	23120	7.68	0.125	Q3MIE4	GO_CC
Cluster1	vesicle	2	3	3547	23120	4.35	0.0634	Q3MIE4 Q9Z1E1	GO_CC
Cluster1	vesicle lumen	1	3	521	23120	14.79	0.0661	Q3MIE4	GO_CC
Cluster1	whole membrane	2	3	2235	23120	6.9	0.0262	Q3MIE4 Q9Z1E1	GO_CC
Cluster2	Golgi apparatus	4	59	2085	23120	0.75	0.791	F1M7X5 P27615 P63039 Q2M2R8	GO_CC
Cluster2	Golgi apparatus part	1	59	1189	23120	0.33	0.956	P27615	GO_CC
Cluster2	Golgi membrane	1	59	739	23120	0.53	0.853	P27615	GO_CC
Cluster2	Golgi subcompartment	1	59	1010	23120	0.39	0.929	P27615	GO_CC
Cluster2	NADH dehydrogenase complex	2	59	65	23120	12.06	0.012	D3ZLT1 Q5XIH3	GO_CC
Cluster2	Pex17p-Pex14p docking complex	1	59	2	23120	195.93	0.0051	Q642G4	GO_CC
Cluster2	apical part of cell	1	59	756	23120	0.52	0.86	F1M7X5	GO_CC
Cluster2	apical plasma membrane	1	59	585	23120	0.67	0.78	F1M7X5	GO_CC
Cluster2	axon	1	59	1217	23120	0.32	0.959	G3V796	GO_CC
Cluster2	bounding membrane of organelle	11	59	2525	23120	1.71	0.0526	D3Z900 D3ZHR2 G3V6I4 P11915 P18163 P27615 Q2M2R8 Q642G4 Q8VID1 Q9WVK3 Q9Z2M4	GO_CC
Cluster2	catalytic complex	5	59	1847	23120	1.06	0.514	D3ZLT1 P08461 P13803 Q5I0P2 Q5XIH3	GO_CC
Cluster2	cell	59	59	22194	23120	1.04	0.0894	A2VCW9 B0BNJ4 B3DMA2 D3Z900 D3ZHR2 D3ZIQ1 D3ZLT1 D4A2K1 F1LN88 F1M7X5 G3V6I4 G3V796 G3V7I0 G3V7J0 O55171 P04636 P07756 P07895 P07896 P08461 P10888 P11915 P12075 P13803 P14604 P15650 P18163 P19511 P21571 P26772 P27615 P28492 P29266 P56571 P63039 P85834 P97519 P97532 P97576 P97852 Q2M2R8 Q4FZT0 Q5I0P2 Q5U4F4 Q5XIC0 Q5XIH3 Q64057 Q642G4 Q64565 Q64602 Q6AY30 Q6AYQ8 Q6P2A5 Q8VID1 Q9ER34 Q9WVK3 Q9WVK7 …	GO_CC
Cluster2	cell junction	1	59	1093	23120	0.36	0.943	F1M7X5	GO_CC
Cluster2	cell leading edge	1	59	668	23120	0.59	0.823	F1M7X5	GO_CC
Cluster2	cell part	59	59	22192	23120	1.04	0.0889	A2VCW9 B0BNJ4 B3DMA2 D3Z900 D3ZHR2 D3ZIQ1 D3ZLT1 D4A2K1 F1LN88 F1M7X5 G3V6I4 G3V796 G3V7I0 G3V7J0 O55171 P04636 P07756 P07895 P07896 P08461 P10888 P11915 P12075 P13803 P14604 P15650 P18163 P19511 P21571 P26772 P27615 P28492 P29266 P56571 P63039 P85834 P97519 P97532 P97576 P97852 Q2M2R8 Q4FZT0 Q5I0P2 Q5U4F4 Q5XIC0 Q5XIH3 Q64057 Q642G4 Q64565 Q64602 Q6AY30 Q6AYQ8 Q6P2A5 Q8VID1 Q9ER34 Q9WVK3 Q9WVK7 …	GO_CC
Cluster2	cell periphery	5	59	7854	23120	0.25	1	F1M7X5 P18163 P27615 P63039 Q4FZT0	GO_CC
Cluster2	cell projection	3	59	3626	23120	0.32	0.997	F1M7X5 G3V796 P97532	GO_CC
Cluster2	cell projection membrane	1	59	565	23120	0.69	0.768	F1M7X5	GO_CC
Cluster2	cell projection part	1	59	2587	23120	0.15	0.999	F1M7X5	GO_CC
Cluster2	cell surface	3	59	1464	23120	0.8	0.73	F1M7X5 P27615 P63039	GO_CC
Cluster2	cell-cell junction	1	59	697	23120	0.56	0.836	F1M7X5	GO_CC
Cluster2	clathrin-coated pit	1	59	84	23120	4.67	0.193	P63039	GO_CC
Cluster2	clathrin-coated vesicle	1	59	267	23120	1.47	0.497	P27615	GO_CC
Cluster2	clathrin-coated vesicle membrane	1	59	145	23120	2.7	0.31	P27615	GO_CC
Cluster2	coated vesicle	2	59	381	23120	2.06	0.254	P27615 P63039	GO_CC
Cluster2	coated vesicle membrane	1	59	217	23120	1.81	0.427	P27615	GO_CC
Cluster2	cytochrome complex	2	59	38	23120	20.62	0.00424	P10888 P12075	GO_CC
Cluster2	cytoplasm	59	59	16001	23120	1.44	3.59e-10	A2VCW9 B0BNJ4 B3DMA2 D3Z900 D3ZHR2 D3ZIQ1 D3ZLT1 D4A2K1 F1LN88 F1M7X5 G3V6I4 G3V796 G3V7I0 G3V7J0 O55171 P04636 P07756 P07895 P07896 P08461 P10888 P11915 P12075 P13803 P14604 P15650 P18163 P19511 P21571 P26772 P27615 P28492 P29266 P56571 P63039 P85834 P97519 P97532 P97576 P97852 Q2M2R8 Q4FZT0 Q5I0P2 Q5U4F4 Q5XIC0 Q5XIH3 Q64057 Q642G4 Q64565 Q64602 Q6AY30 Q6AYQ8 Q6P2A5 Q8VID1 Q9ER34 Q9WVK3 Q9WVK7 …	GO_CC
Cluster2	cytoplasmic part	59	59	13935	23120	1.66	1.01e-13	A2VCW9 B0BNJ4 B3DMA2 D3Z900 D3ZHR2 D3ZIQ1 D3ZLT1 D4A2K1 F1LN88 F1M7X5 G3V6I4 G3V796 G3V7I0 G3V7J0 O55171 P04636 P07756 P07895 P07896 P08461 P10888 P11915 P12075 P13803 P14604 P15650 P18163 P19511 P21571 P26772 P27615 P28492 P29266 P56571 P63039 P85834 P97519 P97532 P97576 P97852 Q2M2R8 Q4FZT0 Q5I0P2 Q5U4F4 Q5XIC0 Q5XIH3 Q64057 Q642G4 Q64565 Q64602 Q6AY30 Q6AYQ8 Q6P2A5 Q8VID1 Q9ER34 Q9WVK3 Q9WVK7 …	GO_CC
Cluster2	cytoplasmic vesicle	5	59	3343	23120	0.59	0.942	F1M7X5 G3V7I0 P27615 P63039 Q6AY30	GO_CC
Cluster2	cytoplasmic vesicle lumen	1	59	513	23120	0.76	0.734	Q6AY30	GO_CC
Cluster2	cytoplasmic vesicle membrane	1	59	980	23120	0.4	0.923	P27615	GO_CC
Cluster2	cytoplasmic vesicle part	2	59	1929	23120	0.41	0.963	P27615 Q6AY30	GO_CC
Cluster2	cytoskeleton	1	59	2763	23120	0.14	0.999	Q4FZT0	GO_CC
Cluster2	cytosol	18	59	7526	23120	0.94	0.678	D3ZHR2 D3ZIQ1 G3V7I0 O55171 P07896 P11915 P63039 P97519 P97532 Q2M2R8 Q5XIC0 Q5XIH3 Q64057 Q6AYQ8 Q8VID1 Q9WVK3 Q9Z2M4 Q9Z311	GO_CC
Cluster2	early endosome	2	59	433	23120	1.81	0.303	G3V7I0 P63039	GO_CC
Cluster2	electron transfer flavoprotein complex	1	59	4	23120	97.97	0.0102	P13803	GO_CC
Cluster2	endocytic vesicle	1	59	480	23120	0.82	0.71	F1M7X5	GO_CC
Cluster2	endomembrane system	9	59	6551	23120	0.54	0.994	F1M7X5 G3V7I0 P11915 P18163 P27615 P63039 Q2M2R8 Q6AY30 Q8VID1	GO_CC
Cluster2	endoplasmic reticulum	6	59	2777	23120	0.85	0.727	F1M7X5 P11915 P18163 P27615 P63039 Q8VID1	GO_CC
Cluster2	endoplasmic reticulum membrane	3	59	1402	23120	0.84	0.702	P18163 P27615 Q8VID1	GO_CC
Cluster2	endoplasmic reticulum part	3	59	1887	23120	0.62	0.87	P18163 P27615 Q8VID1	GO_CC
Cluster2	endoplasmic reticulum subcompartment	3	59	1420	23120	0.83	0.711	P18163 P27615 Q8VID1	GO_CC
Cluster2	endosomal part	1	59	560	23120	0.7	0.765	P27615	GO_CC
Cluster2	endosome	3	59	1306	23120	0.9	0.655	G3V7I0 P27615 P63039	GO_CC
Cluster2	endosome membrane	1	59	441	23120	0.89	0.679	P27615	GO_CC
Cluster2	envelope	19	59	1668	23120	4.46	1.56e-08	B3DMA2 D3Z900 D3ZLT1 G3V6I4 G3V796 P07756 P10888 P11915 P12075 P15650 P18163 P19511 P21571 P63039 P85834 P97576 Q4FZT0 Q5XIH3 Q6P2A5	GO_CC
Cluster2	extracellular exosome	1	59	153	23120	2.56	0.324	P63039	GO_CC
Cluster2	extracellular organelle	1	59	190	23120	2.06	0.386	P63039	GO_CC
Cluster2	extracellular region	3	59	3362	23120	0.35	0.994	F1M7X5 P63039 Q6AY30	GO_CC
Cluster2	extracellular region part	1	59	2407	23120	0.16	0.998	P63039	GO_CC
Cluster2	extracellular space	1	59	2024	23120	0.19	0.996	P63039	GO_CC
Cluster2	extracellular vesicle	1	59	174	23120	2.25	0.36	P63039	GO_CC
Cluster2	extrinsic component of membrane	2	59	453	23120	1.73	0.322	P11915 Q4FZT0	GO_CC
Cluster2	extrinsic component of organelle membrane	1	59	55	23120	7.12	0.131	P11915	GO_CC
Cluster2	extrinsic component of plasma membrane	1	59	268	23120	1.46	0.498	Q4FZT0	GO_CC
Cluster2	fibrillar center	1	59	191	23120	2.05	0.387	Q642G4	GO_CC
Cluster2	glycine cleavage complex	1	59	5	23120	78.37	0.0127	Q5I0P2	GO_CC
Cluster2	inner mitochondrial membrane protein complex	7	59	173	23120	15.86	2.86e-07	D3ZLT1 P10888 P12075 P19511 P21571 P97576 Q5XIH3	GO_CC
Cluster2	integral component of membrane	3	59	4152	23120	0.28	0.999	D3ZHR2 P63039 Q642G4	GO_CC
Cluster2	integral component of organelle membrane	1	59	251	23120	1.56	0.475	D3ZHR2	GO_CC
Cluster2	integral component of peroxisomal membrane	1	59	24	23120	16.33	0.0595	D3ZHR2	GO_CC
Cluster2	intercellular canaliculus	1	59	21	23120	18.66	0.0523	F1M7X5	GO_CC
Cluster2	intracellular	59	59	19286	23120	1.2	2.23e-05	A2VCW9 B0BNJ4 B3DMA2 D3Z900 D3ZHR2 D3ZIQ1 D3ZLT1 D4A2K1 F1LN88 F1M7X5 G3V6I4 G3V796 G3V7I0 G3V7J0 O55171 P04636 P07756 P07895 P07896 P08461 P10888 P11915 P12075 P13803 P14604 P15650 P18163 P19511 P21571 P26772 P27615 P28492 P29266 P56571 P63039 P85834 P97519 P97532 P97576 P97852 Q2M2R8 Q4FZT0 Q5I0P2 Q5U4F4 Q5XIC0 Q5XIH3 Q64057 Q642G4 Q64565 Q64602 Q6AY30 Q6AYQ8 Q6P2A5 Q8VID1 Q9ER34 Q9WVK3 Q9WVK7 …	GO_CC
Cluster2	intracellular membrane-bounded organelle	58	59	14035	23120	1.62	6.09e-12	A2VCW9 B0BNJ4 B3DMA2 D3Z900 D3ZHR2 D3ZIQ1 D3ZLT1 D4A2K1 F1LN88 F1M7X5 G3V6I4 G3V796 G3V7I0 G3V7J0 O55171 P04636 P07756 P07895 P07896 P08461 P10888 P11915 P12075 P13803 P14604 P15650 P18163 P19511 P21571 P26772 P27615 P28492 P29266 P56571 P63039 P85834 P97519 P97532 P97576 P97852 Q2M2R8 Q4FZT0 Q5I0P2 Q5U4F4 Q5XIC0 Q5XIH3 Q64057 Q642G4 Q64565 Q64602 Q6AYQ8 Q6P2A5 Q8VID1 Q9ER34 Q9WVK3 Q9WVK7 Q9Z2M4 …	GO_CC
Cluster2	intracellular non-membrane-bounded organelle	7	59	5595	23120	0.49	0.994	P07756 P07895 P85834 Q4FZT0 Q5U4F4 Q642G4 Q6AY30	GO_CC
Cluster2	intracellular organelle	59	59	16534	23120	1.4	2.49e-09	A2VCW9 B0BNJ4 B3DMA2 D3Z900 D3ZHR2 D3ZIQ1 D3ZLT1 D4A2K1 F1LN88 F1M7X5 G3V6I4 G3V796 G3V7I0 G3V7J0 O55171 P04636 P07756 P07895 P07896 P08461 P10888 P11915 P12075 P13803 P14604 P15650 P18163 P19511 P21571 P26772 P27615 P28492 P29266 P56571 P63039 P85834 P97519 P97532 P97576 P97852 Q2M2R8 Q4FZT0 Q5I0P2 Q5U4F4 Q5XIC0 Q5XIH3 Q64057 Q642G4 Q64565 Q64602 Q6AY30 Q6AYQ8 Q6P2A5 Q8VID1 Q9ER34 Q9WVK3 Q9WVK7 …	GO_CC
Cluster2	intracellular organelle lumen	43	59	7436	23120	2.27	1.64e-10	A2VCW9 B0BNJ4 D3ZIQ1 D3ZLT1 D4A2K1 F1LN88 G3V796 G3V7J0 O55171 P04636 P07756 P07895 P07896 P08461 P11915 P13803 P14604 P15650 P19511 P26772 P27615 P28492 P29266 P63039 P85834 P97519 P97532 P97576 P97852 Q2M2R8 Q4FZT0 Q5XIC0 Q64057 Q642G4 Q64565 Q64602 Q6AY30 Q6AYQ8 Q6P2A5 Q8VID1 Q9ER34 Q9WVK7 Q9Z311	GO_CC
Cluster2	intracellular organelle part	54	59	12485	23120	1.69	3.91e-10	A2VCW9 B0BNJ4 B3DMA2 D3Z900 D3ZHR2 D3ZIQ1 D3ZLT1 D4A2K1 F1LN88 G3V6I4 G3V796 G3V7J0 O55171 P04636 P07756 P07895 P07896 P08461 P10888 P11915 P12075 P13803 P14604 P15650 P18163 P19511 P21571 P26772 P27615 P28492 P29266 P63039 P85834 P97519 P97532 P97576 P97852 Q2M2R8 Q4FZT0 Q5XIC0 Q5XIH3 Q64057 Q642G4 Q64565 Q64602 Q6AY30 Q6AYQ8 Q6P2A5 Q8VID1 Q9ER34 Q9WVK3 Q9WVK7 Q9Z2M4 Q9Z311	GO_CC
Cluster2	intracellular part	59	59	19175	23120	1.21	1.58e-05	A2VCW9 B0BNJ4 B3DMA2 D3Z900 D3ZHR2 D3ZIQ1 D3ZLT1 D4A2K1 F1LN88 F1M7X5 G3V6I4 G3V796 G3V7I0 G3V7J0 O55171 P04636 P07756 P07895 P07896 P08461 P10888 P11915 P12075 P13803 P14604 P15650 P18163 P19511 P21571 P26772 P27615 P28492 P29266 P56571 P63039 P85834 P97519 P97532 P97576 P97852 Q2M2R8 Q4FZT0 Q5I0P2 Q5U4F4 Q5XIC0 Q5XIH3 Q64057 Q642G4 Q64565 Q64602 Q6AY30 Q6AYQ8 Q6P2A5 Q8VID1 Q9ER34 Q9WVK3 Q9WVK7 …	GO_CC
Cluster2	intracellular vesicle	5	59	3355	23120	0.58	0.943	F1M7X5 G3V7I0 P27615 P63039 Q6AY30	GO_CC
Cluster2	intrinsic component of membrane	3	59	4327	23120	0.27	0.999	D3ZHR2 P63039 Q642G4	GO_CC
Cluster2	intrinsic component of organelle membrane	1	59	277	23120	1.41	0.509	D3ZHR2	GO_CC
Cluster2	intrinsic component of peroxisomal membrane	1	59	25	23120	15.67	0.0619	D3ZHR2	GO_CC
Cluster2	invadopodium	1	59	31	23120	12.64	0.0762	F1M7X5	GO_CC
Cluster2	invadopodium membrane	1	59	12	23120	32.66	0.0302	F1M7X5	GO_CC
Cluster2	lamellipodium	1	59	317	23120	1.24	0.558	F1M7X5	GO_CC
Cluster2	late endosome	1	59	325	23120	1.21	0.567	P27615	GO_CC
Cluster2	late endosome membrane	1	59	103	23120	3.8	0.232	P27615	GO_CC
Cluster2	lipid particle	2	59	138	23120	5.68	0.0485	Q5U4F4 Q6AY30	GO_CC
Cluster2	lipopolysaccharide receptor complex	1	59	6	23120	65.31	0.0152	P63039	GO_CC
Cluster2	lysosomal lumen	1	59	144	23120	2.72	0.309	P27615	GO_CC
Cluster2	lysosomal membrane	1	59	302	23120	1.3	0.54	P27615	GO_CC
Cluster2	lysosome	1	59	861	23120	0.46	0.894	P27615	GO_CC
Cluster2	lytic vacuole	1	59	861	23120	0.46	0.894	P27615	GO_CC
Cluster2	lytic vacuole membrane	1	59	302	23120	1.3	0.54	P27615	GO_CC
Cluster2	macromolecular complex	16	59	7260	23120	0.86	0.801	D3ZLT1 G3V7I0 P07756 P08461 P10888 P11915 P12075 P13803 P19511 P21571 P63039 P97576 Q2M2R8 Q5I0P2 Q5XIH3 Q642G4	GO_CC
Cluster2	membrane	27	59	11118	23120	0.95	0.687	B3DMA2 D3Z900 D3ZHR2 D3ZLT1 F1M7X5 G3V6I4 G3V796 P04636 P07756 P10888 P11915 P12075 P15650 P18163 P19511 P21571 P27615 P63039 P85834 P97576 Q2M2R8 Q4FZT0 Q5XIH3 Q642G4 Q8VID1 Q9WVK3 Q9Z2M4	GO_CC
Cluster2	membrane microdomain	2	59	654	23120	1.2	0.5	P63039 Q4FZT0	GO_CC
Cluster2	membrane part	16	59	7202	23120	0.87	0.789	D3ZHR2 D3ZLT1 F1M7X5 P10888 P11915 P12075 P18163 P19511 P21571 P27615 P63039 P97576 Q4FZT0 Q5XIH3 Q642G4 Q8VID1	GO_CC
Cluster2	membrane protein complex	8	59	1489	23120	2.11	0.0346	D3ZLT1 P10888 P12075 P19511 P21571 P63039 P97576 Q5XIH3	GO_CC
Cluster2	membrane raft	2	59	654	23120	1.2	0.5	P63039 Q4FZT0	GO_CC
Cluster2	membrane region	2	59	676	23120	1.16	0.518	P63039 Q4FZT0	GO_CC
Cluster2	membrane-bounded organelle	59	59	15308	23120	1.51	2.62e-11	A2VCW9 B0BNJ4 B3DMA2 D3Z900 D3ZHR2 D3ZIQ1 D3ZLT1 D4A2K1 F1LN88 F1M7X5 G3V6I4 G3V796 G3V7I0 G3V7J0 O55171 P04636 P07756 P07895 P07896 P08461 P10888 P11915 P12075 P13803 P14604 P15650 P18163 P19511 P21571 P26772 P27615 P28492 P29266 P56571 P63039 P85834 P97519 P97532 P97576 P97852 Q2M2R8 Q4FZT0 Q5I0P2 Q5U4F4 Q5XIC0 Q5XIH3 Q64057 Q642G4 Q64565 Q64602 Q6AY30 Q6AYQ8 Q6P2A5 Q8VID1 Q9ER34 Q9WVK3 Q9WVK7 …	GO_CC
Cluster2	membrane-enclosed lumen	43	59	7443	23120	2.26	1.7e-10	A2VCW9 B0BNJ4 D3ZIQ1 D3ZLT1 D4A2K1 F1LN88 G3V796 G3V7J0 O55171 P04636 P07756 P07895 P07896 P08461 P11915 P13803 P14604 P15650 P19511 P26772 P27615 P28492 P29266 P63039 P85834 P97519 P97532 P97576 P97852 Q2M2R8 Q4FZT0 Q5XIC0 Q64057 Q642G4 Q64565 Q64602 Q6AY30 Q6AYQ8 Q6P2A5 Q8VID1 Q9ER34 Q9WVK7 Q9Z311	GO_CC
Cluster2	microbody	17	59	235	23120	28.35	1.4e-20	B3DMA2 D3ZHR2 D3ZIQ1 O55171 P07896 P11915 P18163 P63039 P97519 P97852 Q2M2R8 Q5U4F4 Q5XIC0 Q642G4 Q8VID1 Q9WVK3 Q9Z2M4	GO_CC
Cluster2	microbody lumen	10	59	95	23120	41.25	4.49e-14	D3ZIQ1 O55171 P07896 P11915 P63039 P97519 P97852 Q2M2R8 Q5XIC0 Q8VID1	GO_CC
Cluster2	microbody membrane	7	59	80	23120	34.29	1.34e-09	D3ZHR2 P18163 Q2M2R8 Q642G4 Q8VID1 Q9WVK3 Q9Z2M4	GO_CC
Cluster2	microbody part	15	59	154	23120	38.17	3.48e-20	D3ZHR2 D3ZIQ1 O55171 P07896 P11915 P18163 P63039 P97519 P97852 Q2M2R8 Q5XIC0 Q642G4 Q8VID1 Q9WVK3 Q9Z2M4	GO_CC
Cluster2	midbody	1	59	209	23120	1.87	0.415	Q6AY30	GO_CC
Cluster2	mitochondrial crista	1	59	21	23120	18.66	0.0523	P63039	GO_CC
Cluster2	mitochondrial envelope	19	59	978	23120	7.61	1.88e-12	B3DMA2 D3Z900 D3ZLT1 G3V6I4 G3V796 P07756 P10888 P11915 P12075 P15650 P18163 P19511 P21571 P63039 P85834 P97576 Q4FZT0 Q5XIH3 Q6P2A5	GO_CC
Cluster2	mitochondrial inner membrane	12	59	610	23120	7.71	3.69e-08	B3DMA2 D3ZLT1 P07756 P10888 P12075 P19511 P21571 P63039 P85834 P97576 Q4FZT0 Q5XIH3	GO_CC
Cluster2	mitochondrial intermembrane space	3	59	141	23120	8.34	0.00563	D3ZLT1 Q4FZT0 Q6P2A5	GO_CC
Cluster2	mitochondrial matrix	31	59	624	23120	19.47	3.04e-33	A2VCW9 B0BNJ4 D4A2K1 F1LN88 G3V796 G3V7J0 O55171 P04636 P07756 P07895 P08461 P13803 P14604 P15650 P19511 P26772 P28492 P29266 P63039 P85834 P97519 P97532 P97576 Q64057 Q64565 Q64602 Q6AYQ8 Q6P2A5 Q9ER34 Q9WVK7 Q9Z311	GO_CC
Cluster2	mitochondrial membrane	18	59	886	23120	7.96	3.95e-12	B3DMA2 D3Z900 D3ZLT1 G3V6I4 G3V796 P07756 P10888 P11915 P12075 P15650 P18163 P19511 P21571 P63039 P85834 P97576 Q4FZT0 Q5XIH3	GO_CC
Cluster2	mitochondrial membrane part	9	59	296	23120	11.91	5.87e-08	D3ZLT1 P10888 P11915 P12075 P19511 P21571 P63039 P97576 Q5XIH3	GO_CC
Cluster2	mitochondrial nucleoid	3	59	69	23120	17.04	0.000734	P07756 P07895 P85834	GO_CC
Cluster2	mitochondrial outer membrane	4	59	245	23120	6.4	0.00355	D3Z900 G3V6I4 P11915 P18163	GO_CC
Cluster2	mitochondrial part	42	59	1374	23120	11.98	1.84e-38	A2VCW9 B0BNJ4 B3DMA2 D3Z900 D3ZLT1 D4A2K1 F1LN88 G3V6I4 G3V796 G3V7J0 O55171 P04636 P07756 P07895 P08461 P10888 P11915 P12075 P13803 P14604 P15650 P18163 P19511 P21571 P26772 P28492 P29266 P63039 P85834 P97519 P97532 P97576 Q4FZT0 Q5XIH3 Q64057 Q64565 Q64602 Q6AYQ8 Q6P2A5 Q9ER34 Q9WVK7 Q9Z311	GO_CC
Cluster2	mitochondrial protein complex	9	59	348	23120	10.13	2.32e-07	D3ZLT1 P08461 P10888 P12075 P13803 P19511 P21571 P97576 Q5XIH3	GO_CC
Cluster2	mitochondrial pyruvate dehydrogenase complex	1	59	9	23120	43.54	0.0227	P08461	GO_CC
Cluster2	mitochondrial respiratory chain	4	59	105	23120	14.93	0.000151	D3ZLT1 P10888 P12075 Q5XIH3	GO_CC
Cluster2	mitochondrial respiratory chain complex I	2	59	65	23120	12.06	0.012	D3ZLT1 Q5XIH3	GO_CC
Cluster2	mitochondrial respiratory chain complex IV	2	59	21	23120	37.32	0.0013	P10888 P12075	GO_CC
Cluster2	mitochondrion	49	59	2156	23120	8.91	4.87e-41	A2VCW9 B0BNJ4 B3DMA2 D3Z900 D3ZLT1 D4A2K1 F1LN88 G3V6I4 G3V796 G3V7I0 G3V7J0 O55171 P04636 P07756 P07895 P08461 P10888 P11915 P12075 P13803 P14604 P15650 P18163 P19511 P21571 P26772 P28492 P29266 P56571 P63039 P85834 P97519 P97532 P97576 Q4FZT0 Q5I0P2 Q5U4F4 Q5XIC0 Q5XIH3 Q64057 Q64565 Q64602 Q6AYQ8 Q6P2A5 Q8VID1 Q9ER34 Q9WVK3 Q9WVK7 Q9Z311	GO_CC
Cluster2	myelin sheath	9	59	334	23120	10.56	1.64e-07	G3V7I0 P04636 P07895 P08461 P12075 P19511 P63039 P85834 Q9ER34	GO_CC
Cluster2	neuron part	2	59	2922	23120	0.27	0.997	G3V796 P97532	GO_CC
Cluster2	neuron projection	2	59	2424	23120	0.32	0.989	G3V796 P97532	GO_CC
Cluster2	non-membrane-bounded organelle	7	59	5595	23120	0.49	0.994	P07756 P07895 P85834 Q4FZT0 Q5U4F4 Q642G4 Q6AY30	GO_CC
Cluster2	nuclear body	1	59	1000	23120	0.39	0.927	G3V796	GO_CC
Cluster2	nuclear lumen	10	59	5718	23120	0.69	0.943	B0BNJ4 G3V796 G3V7J0 P07756 P11915 P19511 Q5XIC0 Q642G4 Q6AYQ8 Q9WVK7	GO_CC
Cluster2	nuclear part	10	59	6261	23120	0.63	0.976	B0BNJ4 G3V796 G3V7J0 P07756 P11915 P19511 Q5XIC0 Q642G4 Q6AYQ8 Q9WVK7	GO_CC
Cluster2	nuclear speck	1	59	489	23120	0.8	0.717	G3V796	GO_CC
Cluster2	nucleoid	3	59	69	23120	17.04	0.000734	P07756 P07895 P85834	GO_CC
Cluster2	nucleolar part	1	59	254	23120	1.54	0.479	Q642G4	GO_CC
Cluster2	nucleolus	2	59	1307	23120	0.6	0.854	P07756 Q642G4	GO_CC
Cluster2	nucleoplasm	8	59	4830	23120	0.65	0.946	B0BNJ4 G3V796 G3V7J0 P11915 P19511 Q5XIC0 Q6AYQ8 Q9WVK7	GO_CC
Cluster2	nucleoplasm part	1	59	1449	23120	0.27	0.978	G3V796	GO_CC
Cluster2	nucleus	15	59	9002	23120	0.65	0.99	B0BNJ4 B3DMA2 G3V796 G3V7J0 P07756 P10888 P11915 P19511 P97576 Q5XIC0 Q642G4 Q6AYQ8 Q8VID1 Q9WVK7 Q9Z311	GO_CC
Cluster2	organelle	59	59	16911	23120	1.37	9.44e-09	A2VCW9 B0BNJ4 B3DMA2 D3Z900 D3ZHR2 D3ZIQ1 D3ZLT1 D4A2K1 F1LN88 F1M7X5 G3V6I4 G3V796 G3V7I0 G3V7J0 O55171 P04636 P07756 P07895 P07896 P08461 P10888 P11915 P12075 P13803 P14604 P15650 P18163 P19511 P21571 P26772 P27615 P28492 P29266 P56571 P63039 P85834 P97519 P97532 P97576 P97852 Q2M2R8 Q4FZT0 Q5I0P2 Q5U4F4 Q5XIC0 Q5XIH3 Q64057 Q642G4 Q64565 Q64602 Q6AY30 Q6AYQ8 Q6P2A5 Q8VID1 Q9ER34 Q9WVK3 Q9WVK7 …	GO_CC
Cluster2	organelle envelope	19	59	1667	23120	4.47	1.55e-08	B3DMA2 D3Z900 D3ZLT1 G3V6I4 G3V796 P07756 P10888 P11915 P12075 P15650 P18163 P19511 P21571 P63039 P85834 P97576 Q4FZT0 Q5XIH3 Q6P2A5	GO_CC
Cluster2	organelle envelope lumen	3	59	159	23120	7.39	0.00783	D3ZLT1 Q4FZT0 Q6P2A5	GO_CC
Cluster2	organelle inner membrane	12	59	686	23120	6.85	1.32e-07	B3DMA2 D3ZLT1 P07756 P10888 P12075 P19511 P21571 P63039 P85834 P97576 Q4FZT0 Q5XIH3	GO_CC
Cluster2	organelle lumen	43	59	7443	23120	2.26	1.7e-10	A2VCW9 B0BNJ4 D3ZIQ1 D3ZLT1 D4A2K1 F1LN88 G3V796 G3V7J0 O55171 P04636 P07756 P07895 P07896 P08461 P11915 P13803 P14604 P15650 P19511 P26772 P27615 P28492 P29266 P63039 P85834 P97519 P97532 P97576 P97852 Q2M2R8 Q4FZT0 Q5XIC0 Q64057 Q642G4 Q64565 Q64602 Q6AY30 Q6AYQ8 Q6P2A5 Q8VID1 Q9ER34 Q9WVK7 Q9Z311	GO_CC
Cluster2	organelle membrane	25	59	3708	23120	2.64	1.36e-06	B3DMA2 D3Z900 D3ZHR2 D3ZLT1 G3V6I4 G3V796 P07756 P10888 P11915 P12075 P15650 P18163 P19511 P21571 P27615 P63039 P85834 P97576 Q2M2R8 Q4FZT0 Q5XIH3 Q642G4 Q8VID1 Q9WVK3 Q9Z2M4	GO_CC
Cluster2	organelle outer membrane	4	59	290	23120	5.41	0.00642	D3Z900 G3V6I4 P11915 P18163	GO_CC
Cluster2	organelle part	54	59	12887	23120	1.64	1.81e-09	A2VCW9 B0BNJ4 B3DMA2 D3Z900 D3ZHR2 D3ZIQ1 D3ZLT1 D4A2K1 F1LN88 G3V6I4 G3V796 G3V7J0 O55171 P04636 P07756 P07895 P07896 P08461 P10888 P11915 P12075 P13803 P14604 P15650 P18163 P19511 P21571 P26772 P27615 P28492 P29266 P63039 P85834 P97519 P97532 P97576 P97852 Q2M2R8 Q4FZT0 Q5XIC0 Q5XIH3 Q64057 Q642G4 Q64565 Q64602 Q6AY30 Q6AYQ8 Q6P2A5 Q8VID1 Q9ER34 Q9WVK3 Q9WVK7 Q9Z2M4 Q9Z311	GO_CC
Cluster2	organelle subcompartment	3	59	2202	23120	0.53	0.929	P18163 P27615 Q8VID1	GO_CC
Cluster2	outer membrane	4	59	296	23120	5.3	0.0069	D3Z900 G3V6I4 P11915 P18163	GO_CC
Cluster2	oxidoreductase complex	5	59	153	23120	12.81	4.46e-05	D3ZLT1 P08461 P13803 Q5I0P2 Q5XIH3	GO_CC
Cluster2	perinuclear region of cytoplasm	1	59	1125	23120	0.35	0.947	D3ZHR2	GO_CC
Cluster2	peroxisomal importomer complex	1	59	2	23120	195.93	0.0051	Q642G4	GO_CC
Cluster2	peroxisomal matrix	10	59	95	23120	41.25	4.49e-14	D3ZIQ1 O55171 P07896 P11915 P63039 P97519 P97852 Q2M2R8 Q5XIC0 Q8VID1	GO_CC
Cluster2	peroxisomal membrane	7	59	80	23120	34.29	1.34e-09	D3ZHR2 P18163 Q2M2R8 Q642G4 Q8VID1 Q9WVK3 Q9Z2M4	GO_CC
Cluster2	peroxisomal part	15	59	154	23120	38.17	3.48e-20	D3ZHR2 D3ZIQ1 O55171 P07896 P11915 P18163 P63039 P97519 P97852 Q2M2R8 Q5XIC0 Q642G4 Q8VID1 Q9WVK3 Q9Z2M4	GO_CC
Cluster2	peroxisome	17	59	235	23120	28.35	1.4e-20	B3DMA2 D3ZHR2 D3ZIQ1 O55171 P07896 P11915 P18163 P63039 P97519 P97852 Q2M2R8 Q5U4F4 Q5XIC0 Q642G4 Q8VID1 Q9WVK3 Q9Z2M4	GO_CC
Cluster2	plasma membrane	5	59	7649	23120	0.26	1	F1M7X5 P18163 P27615 P63039 Q4FZT0	GO_CC
Cluster2	plasma membrane part	2	59	4286	23120	0.18	1	F1M7X5 Q4FZT0	GO_CC
Cluster2	plasma membrane region	1	59	1775	23120	0.22	0.991	F1M7X5	GO_CC
Cluster2	platelet alpha granule	1	59	176	23120	2.23	0.363	Q6AY30	GO_CC
Cluster2	platelet alpha granule lumen	1	59	129	23120	3.04	0.281	Q6AY30	GO_CC
Cluster2	presequence translocase-associated import motor	1	59	5	23120	78.37	0.0127	P97576	GO_CC
Cluster2	proton-transporting ATP synthase complex	2	59	31	23120	25.28	0.00284	P19511 P21571	GO_CC
Cluster2	proton-transporting two-sector ATPase complex	2	59	69	23120	11.36	0.0135	P19511 P21571	GO_CC
Cluster2	pyruvate dehydrogenase complex	1	59	15	23120	26.12	0.0376	P08461	GO_CC
Cluster2	receptor complex	1	59	537	23120	0.73	0.751	P63039	GO_CC
Cluster2	respiratory chain	4	59	110	23120	14.25	0.00018	D3ZLT1 P10888 P12075 Q5XIH3	GO_CC
Cluster2	respiratory chain complex	4	59	105	23120	14.93	0.000151	D3ZLT1 P10888 P12075 Q5XIH3	GO_CC
Cluster2	respiratory chain complex I	2	59	65	23120	12.06	0.012	D3ZLT1 Q5XIH3	GO_CC
Cluster2	respiratory chain complex IV	2	59	26	23120	30.14	0.002	P10888 P12075	GO_CC
Cluster2	rough endoplasmic reticulum	1	59	216	23120	1.81	0.426	P63039	GO_CC
Cluster2	secretory granule	2	59	1407	23120	0.56	0.882	P63039 Q6AY30	GO_CC
Cluster2	secretory granule lumen	1	59	487	23120	0.8	0.716	Q6AY30	GO_CC
Cluster2	secretory vesicle	2	59	1691	23120	0.46	0.936	P63039 Q6AY30	GO_CC
Cluster2	transporter complex	1	59	450	23120	0.87	0.687	Q642G4	GO_CC
Cluster2	vacuolar lumen	1	59	273	23120	1.44	0.504	P27615	GO_CC
Cluster2	vacuolar membrane	1	59	371	23120	1.06	0.615	P27615	GO_CC
Cluster2	vacuolar part	1	59	629	23120	0.62	0.804	P27615	GO_CC
Cluster2	vacuole	1	59	1004	23120	0.39	0.927	P27615	GO_CC
Cluster2	vesicle	5	59	3547	23120	0.55	0.96	F1M7X5 G3V7I0 P27615 P63039 Q6AY30	GO_CC
Cluster2	vesicle lumen	1	59	521	23120	0.75	0.74	Q6AY30	GO_CC
Cluster2	vesicle membrane	1	59	1018	23120	0.38	0.93	P27615	GO_CC
Cluster2	whole membrane	13	59	2235	23120	2.28	0.00362	D3Z900 D3ZHR2 G3V6I4 P11915 P18163 P27615 P63039 Q2M2R8 Q4FZT0 Q642G4 Q8VID1 Q9WVK3 Q9Z2M4	GO_CC
Cluster2	zymogen granule	1	59	52	23120	7.54	0.125	P63039	GO_CC
Cluster3	ATPase complex	1	40	117	23120	4.94	0.184	P46462	GO_CC
Cluster3	COPI-coated vesicle	1	40	32	23120	18.06	0.0539	B0BNG3	GO_CC
Cluster3	Derlin-1 retrotranslocation complex	1	40	17	23120	34	0.029	P46462	GO_CC
Cluster3	Golgi apparatus	12	40	2085	23120	3.33	0.000142	B0BNG3 D3ZR49 G3V8G5 P02650 P02770 P24090 Q09325 Q3KR94 Q63083 Q6AXN3 Q6NYB7 Q9WVB1	GO_CC
Cluster3	Golgi apparatus part	9	40	1189	23120	4.38	0.000157	B0BNG3 D3ZR49 G3V8G5 Q09325 Q3KR94 Q63083 Q6AXN3 Q6NYB7 Q9WVB1	GO_CC
Cluster3	Golgi cisterna	2	40	155	23120	7.46	0.0295	G3V8G5 Q63083	GO_CC
Cluster3	Golgi cisterna membrane	1	40	62	23120	9.32	0.102	Q63083	GO_CC
Cluster3	Golgi lumen	1	40	160	23120	3.61	0.243	Q3KR94	GO_CC
Cluster3	Golgi medial cisterna	1	40	56	23120	10.32	0.0925	G3V8G5	GO_CC
Cluster3	Golgi membrane	7	40	739	23120	5.47	0.000246	B0BNG3 D3ZR49 G3V8G5 Q09325 Q63083 Q6NYB7 Q9WVB1	GO_CC
Cluster3	Golgi stack	2	40	195	23120	5.93	0.0448	G3V8G5 Q63083	GO_CC
Cluster3	Golgi subcompartment	7	40	1010	23120	4.01	0.00157	B0BNG3 D3ZR49 G3V8G5 Q09325 Q63083 Q6NYB7 Q9WVB1	GO_CC
Cluster3	Golgi-associated vesicle	2	40	216	23120	5.35	0.0537	B0BNG3 Q63083	GO_CC
Cluster3	VCP-NPL4-UFD1 AAA ATPase complex	1	40	14	23120	41.29	0.024	P46462	GO_CC
Cluster3	VCP-NSFL1C complex	1	40	3	23120	192.67	0.00518	P46462	GO_CC
Cluster3	alphav-beta3 integrin-vitronectin complex	1	40	6	23120	96.33	0.0103	Q3KR94	GO_CC
Cluster3	anchored component of membrane	1	40	97	23120	5.96	0.155	G3V7K3	GO_CC
Cluster3	anchored component of plasma membrane	1	40	69	23120	8.38	0.113	G3V7K3	GO_CC
Cluster3	azurophil granule	2	40	232	23120	4.98	0.061	F1LM05 P46462	GO_CC
Cluster3	azurophil granule lumen	2	40	148	23120	7.81	0.0271	F1LM05 P46462	GO_CC
Cluster3	basement membrane	2	40	198	23120	5.84	0.046	P02770 Q3KR94	GO_CC
Cluster3	blood microparticle	2	40	47	23120	24.6	0.003	P02650 P24090	GO_CC
Cluster3	bounding membrane of organelle	9	40	2525	23120	2.06	0.026	B0BNG3 D3ZR49 G3V8G5 P02650 P08542 Q09325 Q63083 Q6NYB7 Q9WVB1	GO_CC
Cluster3	brush border	1	40	261	23120	2.21	0.365	O35913	GO_CC
Cluster3	brush border membrane	1	40	138	23120	4.19	0.213	O35913	GO_CC
Cluster3	catalytic complex	2	40	1847	23120	0.63	0.84	D4A8N1 P46462	GO_CC
Cluster3	cell	35	40	22194	23120	0.91	0.995	A0A096MJW5 B0BNG3 D3ZR49 D4A8N1 F1LM05 G3V635 G3V7K3 G3V8G5 M0R890 O35913 P00388 P02650 P02706 P02770 P05183 P08542 P08683 P13107 P16303 P24090 P36365 P46462 P51538 P55159 Q06884 Q09325 Q3KR94 Q63081 Q63083 Q64550 Q64573 Q68FP2 Q6AXN3 Q6NYB7 Q9WVB1	GO_CC
Cluster3	cell body	2	40	1440	23120	0.8	0.721	P02650 Q6NYB7	GO_CC
Cluster3	cell part	35	40	22192	23120	0.91	0.995	A0A096MJW5 B0BNG3 D3ZR49 D4A8N1 F1LM05 G3V635 G3V7K3 G3V8G5 M0R890 O35913 P00388 P02650 P02706 P02770 P05183 P08542 P08683 P13107 P16303 P24090 P36365 P46462 P51538 P55159 Q06884 Q09325 Q3KR94 Q63081 Q63083 Q64550 Q64573 Q68FP2 Q6AXN3 Q6NYB7 Q9WVB1	GO_CC
Cluster3	cell periphery	12	40	7854	23120	0.88	0.754	A0A096MJW5 B0BNG3 G3V7K3 G3V8G5 O35913 P02650 P02706 P24090 Q3KR94 Q63081 Q64550 Q9WVB1	GO_CC
Cluster3	cell projection	2	40	3626	23120	0.32	0.991	O35913 P02650	GO_CC
Cluster3	cell projection membrane	1	40	565	23120	1.02	0.629	O35913	GO_CC
Cluster3	cell projection part	2	40	2587	23120	0.45	0.948	O35913 P02650	GO_CC
Cluster3	cell surface	2	40	1464	23120	0.79	0.73	B0BNG3 P02650	GO_CC
Cluster3	centrosome	1	40	716	23120	0.81	0.716	Q9WVB1	GO_CC
Cluster3	chromosomal part	1	40	1103	23120	0.52	0.859	P46462	GO_CC
Cluster3	chromosome	1	40	1236	23120	0.47	0.889	P46462	GO_CC
Cluster3	chylomicron	1	40	18	23120	32.11	0.0307	P02650	GO_CC
Cluster3	cis-Golgi network	2	40	65	23120	17.78	0.00567	Q63083 Q6AXN3	GO_CC
Cluster3	clathrin-coated endocytic vesicle	1	40	85	23120	6.8	0.137	P02650	GO_CC
Cluster3	clathrin-coated endocytic vesicle membrane	1	40	54	23120	10.7	0.0894	P02650	GO_CC
Cluster3	clathrin-coated vesicle	1	40	267	23120	2.16	0.372	P02650	GO_CC
Cluster3	clathrin-coated vesicle membrane	1	40	145	23120	3.99	0.223	P02650	GO_CC
Cluster3	cluster of actin-based cell projections	1	40	333	23120	1.74	0.441	O35913	GO_CC
Cluster3	coated vesicle	2	40	381	23120	3.03	0.141	B0BNG3 P02650	GO_CC
Cluster3	coated vesicle membrane	1	40	217	23120	2.66	0.314	P02650	GO_CC
Cluster3	cytochrome complex	1	40	38	23120	15.21	0.0637	Q64550	GO_CC
Cluster3	cytoplasm	29	40	16001	23120	1.05	0.398	A0A096MJW5 B0BNG3 D3ZR49 D4A8N1 F1LM05 G3V635 G3V8G5 P00388 P02650 P02770 P05183 P08542 P08683 P13107 P16303 P24090 P36365 P46462 P51538 Q06884 Q09325 Q3KR94 Q63081 Q63083 Q64550 Q64573 Q6AXN3 Q6NYB7 Q9WVB1	GO_CC
Cluster3	cytoplasmic part	29	40	13935	23120	1.2	0.0756	A0A096MJW5 B0BNG3 D3ZR49 D4A8N1 F1LM05 G3V635 G3V8G5 P00388 P02650 P02770 P05183 P08542 P08683 P13107 P16303 P24090 P36365 P46462 P51538 Q06884 Q09325 Q3KR94 Q63081 Q63083 Q64550 Q64573 Q6AXN3 Q6NYB7 Q9WVB1	GO_CC
Cluster3	cytoplasmic vesicle	10	40	3343	23120	1.73	0.0545	B0BNG3 F1LM05 P02650 P02770 P24090 P46462 Q63081 Q63083 Q6NYB7 Q9WVB1	GO_CC
Cluster3	cytoplasmic vesicle lumen	5	40	513	23120	5.63	0.00183	F1LM05 P02650 P02770 P24090 P46462	GO_CC
Cluster3	cytoplasmic vesicle membrane	3	40	980	23120	1.77	0.24	P02650 Q6NYB7 Q9WVB1	GO_CC
Cluster3	cytoplasmic vesicle part	7	40	1929	23120	2.1	0.0455	F1LM05 P02650 P02770 P24090 P46462 Q6NYB7 Q9WVB1	GO_CC
Cluster3	cytoskeletal part	1	40	2092	23120	0.28	0.978	Q9WVB1	GO_CC
Cluster3	cytoskeleton	1	40	2763	23120	0.21	0.994	Q9WVB1	GO_CC
Cluster3	cytosol	8	40	7526	23120	0.61	0.973	A0A096MJW5 P02650 P16303 P46462 Q63081 Q64573 Q6NYB7 Q9WVB1	GO_CC
Cluster3	dendrite	1	40	1216	23120	0.48	0.885	P02650	GO_CC
Cluster3	dendritic tree	1	40	1218	23120	0.47	0.885	P02650	GO_CC
Cluster3	discoidal high-density lipoprotein particle	1	40	4	23120	144.5	0.0069	P02650	GO_CC
Cluster3	dolichol-phosphate-mannose synthase complex	1	40	4	23120	144.5	0.0069	D4A8N1	GO_CC
Cluster3	early endosome	3	40	433	23120	4	0.0387	P02650 Q63083 Q6NYB7	GO_CC
Cluster3	endocytic vesicle	1	40	480	23120	1.2	0.568	P02650	GO_CC
Cluster3	endocytic vesicle lumen	1	40	30	23120	19.27	0.0507	P02650	GO_CC
Cluster3	endocytic vesicle membrane	1	40	233	23120	2.48	0.333	P02650	GO_CC
Cluster3	endomembrane system	28	40	6551	23120	2.47	5.48e-08	B0BNG3 D3ZR49 D4A8N1 F1LM05 G3V635 G3V8G5 P00388 P02650 P02770 P05183 P08542 P08683 P13107 P16303 P24090 P36365 P46462 P51538 Q06884 Q09325 Q3KR94 Q63081 Q63083 Q64550 Q64573 Q6AXN3 Q6NYB7 Q9WVB1	GO_CC
Cluster3	endopeptidase complex	1	40	83	23120	6.96	0.134	P46462	GO_CC
Cluster3	endoplasmic reticulum	24	40	2777	23120	5	6.72e-13	D3ZR49 D4A8N1 G3V635 P00388 P02650 P02770 P05183 P08542 P08683 P13107 P16303 P24090 P36365 P46462 P51538 Q06884 Q3KR94 Q63081 Q63083 Q64550 Q64573 Q6AXN3 Q6NYB7 Q9WVB1	GO_CC
Cluster3	endoplasmic reticulum chaperone complex	2	40	18	23120	64.22	0.000439	Q63081 Q64550	GO_CC
Cluster3	endoplasmic reticulum exit site	1	40	60	23120	9.63	0.0988	Q6AXN3	GO_CC
Cluster3	endoplasmic reticulum lumen	9	40	524	23120	9.93	2.16e-07	P02650 P02770 P16303 P24090 P36365 Q3KR94 Q63081 Q63083 Q64573	GO_CC
Cluster3	endoplasmic reticulum membrane	13	40	1402	23120	5.36	3.65e-07	D4A8N1 G3V635 P00388 P05183 P08683 P13107 P46462 P51538 Q06884 Q63081 Q64550 Q6NYB7 Q9WVB1	GO_CC
Cluster3	endoplasmic reticulum part	22	40	1887	23120	6.74	2.74e-14	D4A8N1 G3V635 P00388 P02650 P02770 P05183 P08683 P13107 P16303 P24090 P36365 P46462 P51538 Q06884 Q3KR94 Q63081 Q63083 Q64550 Q64573 Q6AXN3 Q6NYB7 Q9WVB1	GO_CC
Cluster3	endoplasmic reticulum subcompartment	13	40	1420	23120	5.29	4.23e-07	D4A8N1 G3V635 P00388 P05183 P08683 P13107 P46462 P51538 Q06884 Q63081 Q64550 Q6NYB7 Q9WVB1	GO_CC
Cluster3	endosome	3	40	1306	23120	1.33	0.395	P02650 Q63083 Q6NYB7	GO_CC
Cluster3	endosome to plasma membrane transport vesicle	1	40	11	23120	52.55	0.0189	Q9WVB1	GO_CC
Cluster3	envelope	2	40	1668	23120	0.69	0.795	P02650 P08542	GO_CC
Cluster3	exocytic vesicle	2	40	390	23120	2.96	0.146	B0BNG3 Q9WVB1	GO_CC
Cluster3	external side of plasma membrane	1	40	589	23120	0.98	0.644	P02650	GO_CC
Cluster3	extracellular exosome	1	40	153	23120	3.78	0.233	P02770	GO_CC
Cluster3	extracellular matrix	4	40	492	23120	4.7	0.0101	G3V8G5 P02770 P24090 Q3KR94	GO_CC
Cluster3	extracellular membrane-bounded organelle	1	40	19	23120	30.42	0.0324	P24090	GO_CC
Cluster3	extracellular organelle	2	40	190	23120	6.08	0.0427	P02770 P24090	GO_CC
Cluster3	extracellular region	17	40	3362	23120	2.92	1.73e-05	B0BNG3 D3ZBS2 D4A6E3 F1LM05 G3V7K3 G3V8G5 P02650 P02770 P14046 P24090 P46462 P55159 Q3KR94 Q63041 Q63081 Q63083 Q68FP2	GO_CC
Cluster3	extracellular region part	12	40	2407	23120	2.88	0.000543	B0BNG3 F1LM05 G3V7K3 G3V8G5 P02650 P02770 P24090 P55159 Q3KR94 Q63081 Q63083 Q68FP2	GO_CC
Cluster3	extracellular space	11	40	2024	23120	3.14	0.000478	B0BNG3 F1LM05 G3V7K3 P02650 P02770 P24090 P55159 Q3KR94 Q63081 Q63083 Q68FP2	GO_CC
Cluster3	extracellular vesicle	1	40	174	23120	3.32	0.261	P02770	GO_CC
Cluster3	extrinsic component of Golgi membrane	1	40	5	23120	115.6	0.00862	Q63083	GO_CC
Cluster3	extrinsic component of membrane	2	40	453	23120	2.55	0.185	P02650 Q63083	GO_CC
Cluster3	extrinsic component of organelle membrane	1	40	55	23120	10.51	0.0909	Q63083	GO_CC
Cluster3	extrinsic component of plasma membrane	1	40	268	23120	2.16	0.373	P02650	GO_CC
Cluster3	ficolin-1-rich granule	1	40	267	23120	2.16	0.372	P46462	GO_CC
Cluster3	ficolin-1-rich granule lumen	1	40	189	23120	3.06	0.28	P46462	GO_CC
Cluster3	high-density lipoprotein particle	2	40	30	23120	38.53	0.00123	P02650 P55159	GO_CC
Cluster3	integral component of membrane	7	40	4152	23120	0.97	0.595	B0BNG3 D3ZR49 D3ZUD8 O35913 P02706 Q09325 Q64550	GO_CC
Cluster3	integral component of plasma membrane	4	40	2463	23120	0.94	0.629	B0BNG3 O35913 P02706 Q64550	GO_CC
Cluster3	intermediate-density lipoprotein particle	1	40	10	23120	57.8	0.0172	P02650	GO_CC
Cluster3	intracellular	32	40	19286	23120	0.96	0.792	A0A096MJW5 B0BNG3 D3ZR49 D4A8N1 F1LM05 G3V635 G3V8G5 M0R890 P00388 P02650 P02770 P05183 P08542 P08683 P13107 P16303 P24090 P36365 P46462 P51538 P55159 Q06884 Q09325 Q3KR94 Q63081 Q63083 Q64550 Q64573 Q68FP2 Q6AXN3 Q6NYB7 Q9WVB1	GO_CC
Cluster3	intracellular membrane-bounded organelle	32	40	14035	23120	1.32	0.00771	A0A096MJW5 B0BNG3 D3ZR49 D4A8N1 F1LM05 G3V635 G3V8G5 M0R890 P00388 P02650 P02770 P05183 P08542 P08683 P13107 P16303 P24090 P36365 P46462 P51538 P55159 Q06884 Q09325 Q3KR94 Q63081 Q63083 Q64550 Q64573 Q68FP2 Q6AXN3 Q6NYB7 Q9WVB1	GO_CC
Cluster3	intracellular non-membrane-bounded organelle	4	40	5595	23120	0.41	0.994	P16303 P46462 Q64573 Q9WVB1	GO_CC
Cluster3	intracellular organelle	32	40	16534	23120	1.12	0.155	A0A096MJW5 B0BNG3 D3ZR49 D4A8N1 F1LM05 G3V635 G3V8G5 M0R890 P00388 P02650 P02770 P05183 P08542 P08683 P13107 P16303 P24090 P36365 P46462 P51538 P55159 Q06884 Q09325 Q3KR94 Q63081 Q63083 Q64550 Q64573 Q68FP2 Q6AXN3 Q6NYB7 Q9WVB1	GO_CC
Cluster3	intracellular organelle lumen	12	40	7436	23120	0.93	0.672	F1LM05 M0R890 P02650 P02770 P16303 P24090 P36365 P46462 Q3KR94 Q63081 Q63083 Q64573	GO_CC
Cluster3	intracellular organelle part	29	40	12485	23120	1.34	0.013	B0BNG3 D3ZR49 D4A8N1 F1LM05 G3V635 G3V8G5 M0R890 P00388 P02650 P02770 P05183 P08542 P08683 P13107 P16303 P24090 P36365 P46462 P51538 Q06884 Q09325 Q3KR94 Q63081 Q63083 Q64550 Q64573 Q6AXN3 Q6NYB7 Q9WVB1	GO_CC
Cluster3	intracellular part	32	40	19175	23120	0.96	0.767	A0A096MJW5 B0BNG3 D3ZR49 D4A8N1 F1LM05 G3V635 G3V8G5 M0R890 P00388 P02650 P02770 P05183 P08542 P08683 P13107 P16303 P24090 P36365 P46462 P51538 P55159 Q06884 Q09325 Q3KR94 Q63081 Q63083 Q64550 Q64573 Q68FP2 Q6AXN3 Q6NYB7 Q9WVB1	GO_CC
Cluster3	intracellular vesicle	10	40	3355	23120	1.72	0.0556	B0BNG3 F1LM05 P02650 P02770 P24090 P46462 Q63081 Q63083 Q6NYB7 Q9WVB1	GO_CC
Cluster3	intrinsic component of membrane	8	40	4327	23120	1.07	0.481	B0BNG3 D3ZR49 D3ZUD8 G3V7K3 O35913 P02706 Q09325 Q64550	GO_CC
Cluster3	intrinsic component of plasma membrane	5	40	2585	23120	1.12	0.468	B0BNG3 G3V7K3 O35913 P02706 Q64550	GO_CC
Cluster3	late endosome	1	40	325	23120	1.78	0.433	P02650	GO_CC
Cluster3	lipid particle	3	40	138	23120	12.57	0.00175	P16303 P46462 Q64573	GO_CC
Cluster3	lipoprotein particle	2	40	37	23120	31.24	0.00187	P02650 P55159	GO_CC
Cluster3	low-density lipoprotein particle	1	40	11	23120	52.55	0.0189	P02650	GO_CC
Cluster3	lumenal side of Golgi membrane	1	40	1	23120	578	0.00173	Q63083	GO_CC
Cluster3	lumenal side of membrane	1	40	11	23120	52.55	0.0189	Q63083	GO_CC
Cluster3	lysosome	3	40	861	23120	2.01	0.186	F1LM05 P02650 P46462	GO_CC
Cluster3	lytic vacuole	3	40	861	23120	2.01	0.186	F1LM05 P02650 P46462	GO_CC
Cluster3	macromolecular complex	9	40	7260	23120	0.72	0.921	D4A8N1 P02650 P02770 P24090 P46462 P55159 Q3KR94 Q63081 Q64550	GO_CC
Cluster3	mannosyltransferase complex	1	40	5	23120	115.6	0.00862	D4A8N1	GO_CC
Cluster3	melanosome	2	40	69	23120	16.75	0.00636	Q63081 Q6NYB7	GO_CC
Cluster3	membrane	27	40	11118	23120	1.4	0.0104	A0A096MJW5 B0BNG3 D3ZR49 D3ZUD8 D4A8N1 G3V635 G3V7K3 G3V8G5 O35913 P00388 P02650 P02706 P05183 P08542 P08683 P13107 P24090 P46462 P51538 Q06884 Q09325 Q3KR94 Q63081 Q63083 Q64550 Q6NYB7 Q9WVB1	GO_CC
Cluster3	membrane part	24	40	7202	23120	1.93	0.000153	B0BNG3 D3ZR49 D3ZUD8 D4A8N1 G3V635 G3V7K3 O35913 P00388 P02650 P02706 P05183 P08542 P08683 P13107 P46462 P51538 Q06884 Q09325 Q3KR94 Q63081 Q63083 Q64550 Q6NYB7 Q9WVB1	GO_CC
Cluster3	membrane protein complex	2	40	1489	23120	0.78	0.738	P46462 Q3KR94	GO_CC
Cluster3	membrane-bounded organelle	32	40	15308	23120	1.21	0.0425	A0A096MJW5 B0BNG3 D3ZR49 D4A8N1 F1LM05 G3V635 G3V8G5 M0R890 P00388 P02650 P02770 P05183 P08542 P08683 P13107 P16303 P24090 P36365 P46462 P51538 P55159 Q06884 Q09325 Q3KR94 Q63081 Q63083 Q64550 Q64573 Q68FP2 Q6AXN3 Q6NYB7 Q9WVB1	GO_CC
Cluster3	membrane-enclosed lumen	12	40	7443	23120	0.93	0.674	F1LM05 M0R890 P02650 P02770 P16303 P24090 P36365 P46462 Q3KR94 Q63081 Q63083 Q64573	GO_CC
Cluster3	microtubule cytoskeleton	1	40	1640	23120	0.35	0.947	Q9WVB1	GO_CC
Cluster3	microtubule organizing center	1	40	977	23120	0.59	0.822	Q9WVB1	GO_CC
Cluster3	mitochondrion	1	40	2156	23120	0.27	0.98	P00388	GO_CC
Cluster3	myelin sheath	2	40	334	23120	3.46	0.114	P02770 P46462	GO_CC
Cluster3	neuron part	2	40	2922	23120	0.4	0.97	P02650 Q6NYB7	GO_CC
Cluster3	neuron projection	1	40	2424	23120	0.24	0.988	P02650	GO_CC
Cluster3	neuronal cell body	2	40	1312	23120	0.88	0.671	P02650 Q6NYB7	GO_CC
Cluster3	non-membrane-bounded organelle	4	40	5595	23120	0.41	0.994	P16303 P46462 Q64573 Q9WVB1	GO_CC
Cluster3	nuclear envelope	2	40	726	23120	1.59	0.359	P02650 P08542	GO_CC
Cluster3	nuclear lumen	2	40	5718	23120	0.2	1	M0R890 P46462	GO_CC
Cluster3	nuclear membrane	1	40	467	23120	1.24	0.558	P08542	GO_CC
Cluster3	nuclear outer membrane	1	40	45	23120	12.84	0.075	P08542	GO_CC
Cluster3	nuclear part	4	40	6261	23120	0.37	0.998	M0R890 P02650 P08542 P46462	GO_CC
Cluster3	nucleoplasm	2	40	4830	23120	0.24	0.999	M0R890 P46462	GO_CC
Cluster3	nucleus	6	40	9002	23120	0.39	1	F1LM05 M0R890 P02650 P08542 P46462 Q63083	GO_CC
Cluster3	organelle	32	40	16911	23120	1.09	0.215	A0A096MJW5 B0BNG3 D3ZR49 D4A8N1 F1LM05 G3V635 G3V8G5 M0R890 P00388 P02650 P02770 P05183 P08542 P08683 P13107 P16303 P24090 P36365 P46462 P51538 P55159 Q06884 Q09325 Q3KR94 Q63081 Q63083 Q64550 Q64573 Q68FP2 Q6AXN3 Q6NYB7 Q9WVB1	GO_CC
Cluster3	organelle envelope	2	40	1667	23120	0.69	0.794	P02650 P08542	GO_CC
Cluster3	organelle lumen	12	40	7443	23120	0.93	0.674	F1LM05 M0R890 P02650 P02770 P16303 P24090 P36365 P46462 Q3KR94 Q63081 Q63083 Q64573	GO_CC
Cluster3	organelle membrane	15	40	3708	23120	2.34	0.000844	B0BNG3 D3ZR49 G3V635 G3V8G5 P02650 P05183 P08542 P08683 P13107 P51538 Q06884 Q09325 Q63083 Q6NYB7 Q9WVB1	GO_CC
Cluster3	organelle outer membrane	1	40	290	23120	1.99	0.397	P08542	GO_CC
Cluster3	organelle part	29	40	12887	23120	1.3	0.0223	B0BNG3 D3ZR49 D4A8N1 F1LM05 G3V635 G3V8G5 M0R890 P00388 P02650 P02770 P05183 P08542 P08683 P13107 P16303 P24090 P36365 P46462 P51538 Q06884 Q09325 Q3KR94 Q63081 Q63083 Q64550 Q64573 Q6AXN3 Q6NYB7 Q9WVB1	GO_CC
Cluster3	organelle subcompartment	18	40	2202	23120	4.72	5.65e-09	B0BNG3 D3ZR49 D4A8N1 G3V635 G3V8G5 P00388 P05183 P08683 P13107 P46462 P51538 Q06884 Q09325 Q63081 Q63083 Q64550 Q6NYB7 Q9WVB1	GO_CC
Cluster3	outer membrane	1	40	296	23120	1.95	0.403	P08542	GO_CC
Cluster3	peptidase complex	1	40	117	23120	4.94	0.184	P46462	GO_CC
Cluster3	perinuclear region of cytoplasm	2	40	1125	23120	1.03	0.586	B0BNG3 P46462	GO_CC
Cluster3	pigment granule	2	40	69	23120	16.75	0.00636	Q63081 Q6NYB7	GO_CC
Cluster3	plasma lipoprotein particle	2	40	37	23120	31.24	0.00187	P02650 P55159	GO_CC
Cluster3	plasma membrane	12	40	7649	23120	0.91	0.715	A0A096MJW5 B0BNG3 G3V7K3 G3V8G5 O35913 P02650 P02706 P24090 Q3KR94 Q63081 Q64550 Q9WVB1	GO_CC
Cluster3	plasma membrane part	7	40	4286	23120	0.94	0.631	B0BNG3 G3V7K3 O35913 P02650 P02706 Q3KR94 Q64550	GO_CC
Cluster3	plasma membrane protein complex	1	40	803	23120	0.72	0.757	Q3KR94	GO_CC
Cluster3	plasma membrane region	1	40	1775	23120	0.33	0.959	O35913	GO_CC
Cluster3	platelet alpha granule	3	40	176	23120	9.85	0.00348	F1LM05 P02770 P24090	GO_CC
Cluster3	platelet alpha granule lumen	3	40	129	23120	13.44	0.00144	F1LM05 P02770 P24090	GO_CC
Cluster3	presynapse	1	40	725	23120	0.8	0.721	Q6NYB7	GO_CC
Cluster3	primary lysosome	2	40	232	23120	4.98	0.061	F1LM05 P46462	GO_CC
Cluster3	proteasome complex	1	40	82	23120	7.05	0.133	P46462	GO_CC
Cluster3	protein-lipid complex	2	40	42	23120	27.52	0.00241	P02650 P55159	GO_CC
Cluster3	rough endoplasmic reticulum	2	40	216	23120	5.35	0.0537	Q3KR94 Q63083	GO_CC
Cluster3	rough endoplasmic reticulum lumen	1	40	12	23120	48.17	0.0206	Q3KR94	GO_CC
Cluster3	secretory granule	5	40	1407	23120	2.05	0.0936	F1LM05 P02770 P24090 P46462 Q9WVB1	GO_CC
Cluster3	secretory granule lumen	4	40	487	23120	4.75	0.00976	F1LM05 P02770 P24090 P46462	GO_CC
Cluster3	secretory granule membrane	1	40	459	23120	1.26	0.552	Q9WVB1	GO_CC
Cluster3	secretory vesicle	6	40	1691	23120	2.05	0.0689	B0BNG3 F1LM05 P02770 P24090 P46462 Q9WVB1	GO_CC
Cluster3	side of membrane	2	40	970	23120	1.19	0.505	P02650 Q63083	GO_CC
Cluster3	site of DNA damage	1	40	49	23120	11.8	0.0814	P46462	GO_CC
Cluster3	site of double-strand break	1	40	47	23120	12.3	0.0782	P46462	GO_CC
Cluster3	smooth endoplasmic reticulum	1	40	61	23120	9.48	0.1	Q63081	GO_CC
Cluster3	somatodendritic compartment	2	40	1779	23120	0.65	0.824	P02650 Q6NYB7	GO_CC
Cluster3	spherical high-density lipoprotein particle	1	40	12	23120	48.17	0.0206	P55159	GO_CC
Cluster3	synapse	1	40	1614	23120	0.36	0.945	Q6NYB7	GO_CC
Cluster3	synapse part	1	40	1375	23120	0.42	0.914	Q6NYB7	GO_CC
Cluster3	trans-Golgi network	2	40	364	23120	3.18	0.131	Q63083 Q9WVB1	GO_CC
Cluster3	trans-Golgi network membrane	1	40	128	23120	4.52	0.199	Q9WVB1	GO_CC
Cluster3	transferase complex	1	40	1030	23120	0.56	0.839	D4A8N1	GO_CC
Cluster3	transport vesicle	3	40	598	23120	2.9	0.0842	B0BNG3 Q6NYB7 Q9WVB1	GO_CC
Cluster3	transport vesicle membrane	1	40	238	23120	2.43	0.339	Q6NYB7	GO_CC
Cluster3	triglyceride-rich plasma lipoprotein particle	1	40	27	23120	21.41	0.0457	P02650	GO_CC
Cluster3	vacuolar lumen	2	40	273	23120	4.23	0.0809	F1LM05 P46462	GO_CC
Cluster3	vacuolar part	2	40	629	23120	1.84	0.297	F1LM05 P46462	GO_CC
Cluster3	vacuole	3	40	1004	23120	1.73	0.251	F1LM05 P02650 P46462	GO_CC
Cluster3	very-low-density lipoprotein particle	1	40	25	23120	23.12	0.0424	P02650	GO_CC
Cluster3	vesicle	10	40	3547	23120	1.63	0.0759	B0BNG3 F1LM05 P02650 P02770 P24090 P46462 Q63081 Q63083 Q6NYB7 Q9WVB1	GO_CC
Cluster3	vesicle lumen	5	40	521	23120	5.55	0.00196	F1LM05 P02650 P02770 P24090 P46462	GO_CC
Cluster3	vesicle membrane	3	40	1018	23120	1.7	0.257	P02650 Q6NYB7 Q9WVB1	GO_CC
Cluster3	whole membrane	4	40	2235	23120	1.03	0.549	P02650 P08542 Q6NYB7 Q9WVB1	GO_CC
Cluster4	Golgi apparatus	1	51	2085	23120	0.22	0.992	Q9Z2Q7	GO_CC
Cluster4	Golgi apparatus part	1	51	1189	23120	0.38	0.933	Q9Z2Q7	GO_CC
Cluster4	Golgi subcompartment	1	51	1010	23120	0.45	0.898	Q9Z2Q7	GO_CC
Cluster4	MICOS complex	1	51	8	23120	56.67	0.0175	Q3KR86	GO_CC
Cluster4	NADH dehydrogenase complex	3	51	65	23120	20.92	0.000401	B0BNE6 Q561S0 Q63362	GO_CC
Cluster4	SNARE complex	1	51	67	23120	6.77	0.138	Q9Z2Q7	GO_CC
Cluster4	T-tubule	1	51	142	23120	3.19	0.27	P00507	GO_CC
Cluster4	alveolar lamellar body	1	51	20	23120	22.67	0.0432	P14562	GO_CC
Cluster4	apical part of cell	1	51	756	23120	0.6	0.817	G3V887	GO_CC
Cluster4	apical plasma membrane	1	51	585	23120	0.77	0.73	G3V887	GO_CC
Cluster4	autolysosome	1	51	23	23120	19.71	0.0495	P14562	GO_CC
Cluster4	autophagosome	1	51	132	23120	3.43	0.253	P14562	GO_CC
Cluster4	bounding membrane of organelle	4	51	2525	23120	0.72	0.822	G3V887 P14562 Q4FZY1 Q9Z2Q7	GO_CC
Cluster4	catalytic complex	12	51	1847	23120	2.95	0.000549	B0BMW2 B0BNE6 G3V6P2 P13086 P21913 P32551 Q561S0 Q63362 Q66HF3 Q68FY0 Q6PCT8 Q920L2	GO_CC
Cluster4	caveola	1	51	164	23120	2.76	0.305	P14562	GO_CC
Cluster4	cell	51	51	22194	23120	1.04	0.124	B0BMW2 B0BNE6 D3ZAF6 D4ADD7 F1LZW6 F1M953 G3V6D3 G3V6H5 G3V6P2 G3V734 G3V741 G3V7Y3 G3V887 O89035 P00507 P04041 P10860 P11240 P13086 P14562 P15999 P17764 P20611 P21913 P24473 P29147 P29419 P32089 P32551 P38718 P63031 Q06647 Q3KR86 Q3KRE0 Q4FZY1 Q561S0 Q5BJZ3 Q5M9H2 Q5XIH7 Q63362 Q66HF3 Q68FT3 Q68FY0 Q6AYS2 Q6IFW6 Q6IMF3 Q6P7S1 Q6PCT8 Q6UPE0 Q920L2 Q9Z2Q7	GO_CC
Cluster4	cell body	3	51	1440	23120	0.94	0.623	D4ADD7 P00507 P14562	GO_CC
Cluster4	cell part	51	51	22192	23120	1.04	0.123	B0BMW2 B0BNE6 D3ZAF6 D4ADD7 F1LZW6 F1M953 G3V6D3 G3V6H5 G3V6P2 G3V734 G3V741 G3V7Y3 G3V887 O89035 P00507 P04041 P10860 P11240 P13086 P14562 P15999 P17764 P20611 P21913 P24473 P29147 P29419 P32089 P32551 P38718 P63031 Q06647 Q3KR86 Q3KRE0 Q4FZY1 Q561S0 Q5BJZ3 Q5M9H2 Q5XIH7 Q63362 Q66HF3 Q68FT3 Q68FY0 Q6AYS2 Q6IFW6 Q6IMF3 Q6P7S1 Q6PCT8 Q6UPE0 Q920L2 Q9Z2Q7	GO_CC
Cluster4	cell periphery	16	51	7854	23120	0.92	0.701	B0BMW2 F1LZW6 G3V6D3 G3V6H5 G3V6P2 G3V887 P00507 P13086 P14562 P15999 P21913 Q06647 Q4FZY1 Q6IFW6 Q6IMF3 Q9Z2Q7	GO_CC
Cluster4	cell projection	3	51	3626	23120	0.38	0.991	D4ADD7 P14562 P20611	GO_CC
Cluster4	cell projection part	2	51	2587	23120	0.35	0.983	D4ADD7 P14562	GO_CC
Cluster4	cell surface	3	51	1464	23120	0.93	0.635	G3V6D3 P00507 P14562	GO_CC
Cluster4	cornified envelope	2	51	47	23120	19.29	0.00484	Q6IFW6 Q6IMF3	GO_CC
Cluster4	cytochrome complex	3	51	38	23120	35.79	8.08e-05	P11240 P32551 Q68FY0	GO_CC
Cluster4	cytolytic granule	1	51	15	23120	30.22	0.0326	P14562	GO_CC
Cluster4	cytoplasm	50	51	16001	23120	1.42	1.63e-07	B0BMW2 B0BNE6 D3ZAF6 D4ADD7 F1LZW6 F1M953 G3V6D3 G3V6H5 G3V6P2 G3V734 G3V741 G3V7Y3 G3V887 O89035 P00507 P04041 P10860 P11240 P13086 P14562 P15999 P17764 P20611 P21913 P24473 P29147 P29419 P32089 P32551 P38718 P63031 Q06647 Q3KR86 Q3KRE0 Q4FZY1 Q561S0 Q5BJZ3 Q5M9H2 Q5XIH7 Q63362 Q66HF3 Q68FY0 Q6AYS2 Q6IFW6 Q6IMF3 Q6P7S1 Q6PCT8 Q6UPE0 Q920L2 Q9Z2Q7	GO_CC
Cluster4	cytoplasmic part	50	51	13935	23120	1.63	2.05e-10	B0BMW2 B0BNE6 D3ZAF6 D4ADD7 F1LZW6 F1M953 G3V6D3 G3V6H5 G3V6P2 G3V734 G3V741 G3V7Y3 G3V887 O89035 P00507 P04041 P10860 P11240 P13086 P14562 P15999 P17764 P20611 P21913 P24473 P29147 P29419 P32089 P32551 P38718 P63031 Q06647 Q3KR86 Q3KRE0 Q4FZY1 Q561S0 Q5BJZ3 Q5M9H2 Q5XIH7 Q63362 Q66HF3 Q68FY0 Q6AYS2 Q6IFW6 Q6IMF3 Q6P7S1 Q6PCT8 Q6UPE0 Q920L2 Q9Z2Q7	GO_CC
Cluster4	cytoplasmic vesicle	7	51	3343	23120	0.95	0.62	G3V887 P14562 P20611 Q4FZY1 Q6IMF3 Q6P7S1 Q9Z2Q7	GO_CC
Cluster4	cytoplasmic vesicle membrane	2	51	980	23120	0.93	0.643	G3V887 P14562	GO_CC
Cluster4	cytoplasmic vesicle part	6	51	1929	23120	1.41	0.25	G3V887 P14562 Q4FZY1 Q6IMF3 Q6P7S1 Q9Z2Q7	GO_CC
Cluster4	cytoskeletal part	2	51	2092	23120	0.43	0.952	Q6IFW6 Q6IMF3	GO_CC
Cluster4	cytoskeleton	2	51	2763	23120	0.33	0.988	Q6IFW6 Q6IMF3	GO_CC
Cluster4	cytosol	8	51	7526	23120	0.48	0.998	G3V734 P04041 P13086 P24473 Q5M9H2 Q68FY0 Q6IFW6 Q6IMF3	GO_CC
Cluster4	dendrite	2	51	1216	23120	0.75	0.757	D4ADD7 P14562	GO_CC
Cluster4	dendritic tree	2	51	1218	23120	0.74	0.758	D4ADD7 P14562	GO_CC
Cluster4	dihydrolipoyl dehydrogenase complex	1	51	15	23120	30.22	0.0326	G3V6P2	GO_CC
Cluster4	early endosome	1	51	433	23120	1.05	0.619	Q9Z2Q7	GO_CC
Cluster4	electron transfer flavoprotein complex	1	51	4	23120	113.33	0.00879	Q66HF3	GO_CC
Cluster4	endocytic vesicle	3	51	480	23120	2.83	0.0893	G3V887 P14562 Q9Z2Q7	GO_CC
Cluster4	endocytic vesicle membrane	2	51	233	23120	3.89	0.0935	G3V887 P14562	GO_CC
Cluster4	endomembrane system	7	51	6551	23120	0.48	0.996	B0BMW2 G3V887 P14562 Q4FZY1 Q6IMF3 Q6P7S1 Q9Z2Q7	GO_CC
Cluster4	endonuclease complex	1	51	32	23120	14.17	0.0683	B0BMW2	GO_CC
Cluster4	endoplasmic reticulum	2	51	2777	23120	0.33	0.988	B0BMW2 Q9Z2Q7	GO_CC
Cluster4	endoribonuclease complex	1	51	32	23120	14.17	0.0683	B0BMW2	GO_CC
Cluster4	endosomal part	4	51	560	23120	3.24	0.0348	G3V887 P14562 Q4FZY1 Q9Z2Q7	GO_CC
Cluster4	endosome	4	51	1306	23120	1.39	0.325	G3V887 P14562 Q4FZY1 Q9Z2Q7	GO_CC
Cluster4	endosome membrane	4	51	441	23120	4.11	0.0161	G3V887 P14562 Q4FZY1 Q9Z2Q7	GO_CC
Cluster4	envelope	31	51	1668	23120	8.43	5.79e-23	B0BNE6 D3ZAF6 F1LZW6 G3V6D3 G3V6H5 G3V741 G3V7Y3 O89035 P00507 P11240 P15999 P21913 P29147 P29419 P32089 P32551 P38718 P63031 Q06647 Q3KR86 Q561S0 Q5BJZ3 Q5M9H2 Q5XIH7 Q63362 Q66HF3 Q68FY0 Q6AYS2 Q6PCT8 Q6UPE0 Q920L2	GO_CC
Cluster4	exocytic vesicle	1	51	390	23120	1.16	0.58	P14562	GO_CC
Cluster4	external side of plasma membrane	1	51	589	23120	0.77	0.732	P14562	GO_CC
Cluster4	extracellular region	2	51	3362	23120	0.27	0.997	Q6IMF3 Q6P7S1	GO_CC
Cluster4	extracellular region part	1	51	2407	23120	0.19	0.996	Q6P7S1	GO_CC
Cluster4	extracellular space	1	51	2024	23120	0.22	0.991	Q6P7S1	GO_CC
Cluster4	ficolin-1-rich granule	3	51	267	23120	5.09	0.0211	G3V887 Q6IMF3 Q6P7S1	GO_CC
Cluster4	ficolin-1-rich granule lumen	2	51	189	23120	4.8	0.0653	Q6IMF3 Q6P7S1	GO_CC
Cluster4	ficolin-1-rich granule membrane	1	51	78	23120	5.81	0.158	G3V887	GO_CC
Cluster4	fumarate reductase complex	3	51	5	23120	272	1.01e-07	P21913 Q6PCT8 Q920L2	GO_CC
Cluster4	inner mitochondrial membrane protein complex	16	51	173	23120	41.93	2.72e-22	B0BNE6 D3ZAF6 G3V6D3 G3V7Y3 P11240 P15999 P21913 P29419 P32551 Q06647 Q3KR86 Q561S0 Q63362 Q68FY0 Q6PCT8 Q920L2	GO_CC
Cluster4	integral component of membrane	12	51	4152	23120	1.31	0.193	F1LZW6 G3V6H5 G3V741 G3V887 O89035 P20611 P32089 P38718 P63031 Q3KR86 Q66HF3 Q9Z2Q7	GO_CC
Cluster4	integral component of mitochondrial inner membrane	4	51	45	23120	40.3	2.93e-06	P38718 P63031 Q3KR86 Q66HF3	GO_CC
Cluster4	integral component of mitochondrial membrane	4	51	95	23120	19.09	5.77e-05	P38718 P63031 Q3KR86 Q66HF3	GO_CC
Cluster4	integral component of organelle membrane	4	51	251	23120	7.22	0.00227	P38718 P63031 Q3KR86 Q66HF3	GO_CC
Cluster4	integral component of plasma membrane	4	51	2463	23120	0.74	0.807	F1LZW6 G3V6H5 G3V887 Q9Z2Q7	GO_CC
Cluster4	intermediate filament	2	51	129	23120	7.03	0.033	Q6IFW6 Q6IMF3	GO_CC
Cluster4	intermediate filament cytoskeleton	2	51	210	23120	4.32	0.0784	Q6IFW6 Q6IMF3	GO_CC
Cluster4	intracellular	51	51	19286	23120	1.2	9.53e-05	B0BMW2 B0BNE6 D3ZAF6 D4ADD7 F1LZW6 F1M953 G3V6D3 G3V6H5 G3V6P2 G3V734 G3V741 G3V7Y3 G3V887 O89035 P00507 P04041 P10860 P11240 P13086 P14562 P15999 P17764 P20611 P21913 P24473 P29147 P29419 P32089 P32551 P38718 P63031 Q06647 Q3KR86 Q3KRE0 Q4FZY1 Q561S0 Q5BJZ3 Q5M9H2 Q5XIH7 Q63362 Q66HF3 Q68FT3 Q68FY0 Q6AYS2 Q6IFW6 Q6IMF3 Q6P7S1 Q6PCT8 Q6UPE0 Q920L2 Q9Z2Q7	GO_CC
Cluster4	intracellular membrane-bounded organelle	48	51	14035	23120	1.55	5.33e-08	B0BMW2 B0BNE6 D3ZAF6 D4ADD7 F1LZW6 F1M953 G3V6D3 G3V6H5 G3V6P2 G3V734 G3V741 G3V7Y3 G3V887 O89035 P00507 P04041 P10860 P11240 P13086 P14562 P15999 P17764 P20611 P21913 P24473 P29147 P29419 P32089 P32551 P38718 P63031 Q06647 Q3KR86 Q3KRE0 Q4FZY1 Q561S0 Q5BJZ3 Q5M9H2 Q5XIH7 Q63362 Q66HF3 Q68FY0 Q6AYS2 Q6P7S1 Q6PCT8 Q6UPE0 Q920L2 Q9Z2Q7	GO_CC
Cluster4	intracellular non-membrane-bounded organelle	7	51	5595	23120	0.57	0.978	B0BMW2 F1M953 G3V6D3 Q5M9H2 Q6IFW6 Q6IMF3 Q920L2	GO_CC
Cluster4	intracellular organelle	50	51	16534	23120	1.37	7.84e-07	B0BMW2 B0BNE6 D3ZAF6 D4ADD7 F1LZW6 F1M953 G3V6D3 G3V6H5 G3V6P2 G3V734 G3V741 G3V7Y3 G3V887 O89035 P00507 P04041 P10860 P11240 P13086 P14562 P15999 P17764 P20611 P21913 P24473 P29147 P29419 P32089 P32551 P38718 P63031 Q06647 Q3KR86 Q3KRE0 Q4FZY1 Q561S0 Q5BJZ3 Q5M9H2 Q5XIH7 Q63362 Q66HF3 Q68FY0 Q6AYS2 Q6IFW6 Q6IMF3 Q6P7S1 Q6PCT8 Q6UPE0 Q920L2 Q9Z2Q7	GO_CC
Cluster4	intracellular organelle lumen	25	51	7436	23120	1.52	0.00895	B0BMW2 B0BNE6 D4ADD7 F1M953 G3V6D3 G3V6P2 G3V734 G3V7Y3 O89035 P00507 P04041 P10860 P13086 P17764 P20611 P21913 P24473 P29147 P32551 Q5M9H2 Q5XIH7 Q66HF3 Q6IMF3 Q6P7S1 Q920L2	GO_CC
Cluster4	intracellular organelle part	49	51	12485	23120	1.78	2.1e-11	B0BMW2 B0BNE6 D3ZAF6 D4ADD7 F1LZW6 F1M953 G3V6D3 G3V6H5 G3V6P2 G3V734 G3V741 G3V7Y3 G3V887 O89035 P00507 P04041 P10860 P11240 P13086 P14562 P15999 P17764 P20611 P21913 P24473 P29147 P29419 P32089 P32551 P38718 P63031 Q06647 Q3KR86 Q4FZY1 Q561S0 Q5BJZ3 Q5M9H2 Q5XIH7 Q63362 Q66HF3 Q68FY0 Q6AYS2 Q6IFW6 Q6IMF3 Q6P7S1 Q6PCT8 Q6UPE0 Q920L2 Q9Z2Q7	GO_CC
Cluster4	intracellular part	50	51	19175	23120	1.18	0.000818	B0BMW2 B0BNE6 D3ZAF6 D4ADD7 F1LZW6 F1M953 G3V6D3 G3V6H5 G3V6P2 G3V734 G3V741 G3V7Y3 G3V887 O89035 P00507 P04041 P10860 P11240 P13086 P14562 P15999 P17764 P20611 P21913 P24473 P29147 P29419 P32089 P32551 P38718 P63031 Q06647 Q3KR86 Q3KRE0 Q4FZY1 Q561S0 Q5BJZ3 Q5M9H2 Q5XIH7 Q63362 Q66HF3 Q68FY0 Q6AYS2 Q6IFW6 Q6IMF3 Q6P7S1 Q6PCT8 Q6UPE0 Q920L2 Q9Z2Q7	GO_CC
Cluster4	intracellular vesicle	7	51	3355	23120	0.95	0.624	G3V887 P14562 P20611 Q4FZY1 Q6IMF3 Q6P7S1 Q9Z2Q7	GO_CC
Cluster4	intrinsic component of membrane	12	51	4327	23120	1.26	0.235	F1LZW6 G3V6H5 G3V741 G3V887 O89035 P20611 P32089 P38718 P63031 Q3KR86 Q66HF3 Q9Z2Q7	GO_CC
Cluster4	intrinsic component of mitochondrial membrane	4	51	100	23120	18.13	7.04e-05	P38718 P63031 Q3KR86 Q66HF3	GO_CC
Cluster4	intrinsic component of organelle membrane	4	51	277	23120	6.55	0.00324	P38718 P63031 Q3KR86 Q66HF3	GO_CC
Cluster4	intrinsic component of plasma membrane	4	51	2585	23120	0.7	0.837	F1LZW6 G3V6H5 G3V887 Q9Z2Q7	GO_CC
Cluster4	keratin filament	1	51	31	23120	14.62	0.0662	Q6IMF3	GO_CC
Cluster4	lamellar body	1	51	38	23120	11.93	0.0806	P14562	GO_CC
Cluster4	late endosome	2	51	325	23120	2.79	0.161	P14562 Q9Z2Q7	GO_CC
Cluster4	late endosome membrane	1	51	103	23120	4.4	0.204	Q9Z2Q7	GO_CC
Cluster4	lumenal side of membrane	1	51	11	23120	41.21	0.024	P29147	GO_CC
Cluster4	lysosomal lumen	2	51	144	23120	6.3	0.0403	P20611 Q6P7S1	GO_CC
Cluster4	lysosomal membrane	3	51	302	23120	4.5	0.029	P14562 Q4FZY1 Q9Z2Q7	GO_CC
Cluster4	lysosome	5	51	861	23120	2.63	0.0406	P14562 P20611 Q4FZY1 Q6P7S1 Q9Z2Q7	GO_CC
Cluster4	lytic vacuole	5	51	861	23120	2.63	0.0406	P14562 P20611 Q4FZY1 Q6P7S1 Q9Z2Q7	GO_CC
Cluster4	lytic vacuole membrane	3	51	302	23120	4.5	0.029	P14562 Q4FZY1 Q9Z2Q7	GO_CC
Cluster4	macromolecular complex	24	51	7260	23120	1.5	0.0138	B0BMW2 B0BNE6 D3ZAF6 G3V6D3 G3V6P2 G3V7Y3 G3V887 P00507 P11240 P13086 P15999 P21913 P29419 P32551 Q06647 Q3KR86 Q561S0 Q5XIH7 Q63362 Q66HF3 Q68FY0 Q6PCT8 Q920L2 Q9Z2Q7	GO_CC
Cluster4	matrix side of mitochondrial inner membrane	1	51	5	23120	90.67	0.011	P29147	GO_CC
Cluster4	melanosome	1	51	69	23120	6.57	0.142	P14562	GO_CC
Cluster4	membrane	41	51	11118	23120	1.67	2.08e-06	B0BMW2 B0BNE6 D3ZAF6 F1LZW6 G3V6D3 G3V6H5 G3V6P2 G3V741 G3V7Y3 G3V887 O89035 P00507 P11240 P13086 P14562 P15999 P20611 P21913 P29147 P29419 P32089 P32551 P38718 P63031 Q06647 Q3KR86 Q4FZY1 Q561S0 Q5BJZ3 Q5M9H2 Q5XIH7 Q63362 Q66HF3 Q68FY0 Q6AYS2 Q6IFW6 Q6IMF3 Q6PCT8 Q6UPE0 Q920L2 Q9Z2Q7	GO_CC
Cluster4	membrane microdomain	3	51	654	23120	2.08	0.175	G3V6D3 P14562 P15999	GO_CC
Cluster4	membrane part	31	51	7202	23120	1.95	1.19e-05	B0BNE6 D3ZAF6 F1LZW6 G3V6D3 G3V6H5 G3V741 G3V7Y3 G3V887 O89035 P00507 P11240 P14562 P15999 P20611 P21913 P29147 P29419 P32089 P32551 P38718 P63031 Q06647 Q3KR86 Q561S0 Q5BJZ3 Q63362 Q66HF3 Q68FY0 Q6PCT8 Q920L2 Q9Z2Q7	GO_CC
Cluster4	membrane protein complex	18	51	1489	23120	5.48	1.19e-09	B0BNE6 D3ZAF6 G3V6D3 G3V7Y3 G3V887 P11240 P15999 P21913 P29419 P32551 Q06647 Q3KR86 Q561S0 Q63362 Q68FY0 Q6PCT8 Q920L2 Q9Z2Q7	GO_CC
Cluster4	membrane raft	3	51	654	23120	2.08	0.175	G3V6D3 P14562 P15999	GO_CC
Cluster4	membrane region	3	51	676	23120	2.01	0.187	G3V6D3 P14562 P15999	GO_CC
Cluster4	membrane-bounded organelle	49	51	15308	23120	1.45	2.59e-07	B0BMW2 B0BNE6 D3ZAF6 D4ADD7 F1LZW6 F1M953 G3V6D3 G3V6H5 G3V6P2 G3V734 G3V741 G3V7Y3 G3V887 O89035 P00507 P04041 P10860 P11240 P13086 P14562 P15999 P17764 P20611 P21913 P24473 P29147 P29419 P32089 P32551 P38718 P63031 Q06647 Q3KR86 Q3KRE0 Q4FZY1 Q561S0 Q5BJZ3 Q5M9H2 Q5XIH7 Q63362 Q66HF3 Q68FY0 Q6AYS2 Q6IMF3 Q6P7S1 Q6PCT8 Q6UPE0 Q920L2 Q9Z2Q7	GO_CC
Cluster4	membrane-enclosed lumen	25	51	7443	23120	1.52	0.00907	B0BMW2 B0BNE6 D4ADD7 F1M953 G3V6D3 G3V6P2 G3V734 G3V7Y3 O89035 P00507 P04041 P10860 P13086 P17764 P20611 P21913 P24473 P29147 P32551 Q5M9H2 Q5XIH7 Q66HF3 Q6IMF3 Q6P7S1 Q920L2	GO_CC
Cluster4	microbody	1	51	235	23120	1.93	0.406	P24473	GO_CC
Cluster4	microbody lumen	1	51	95	23120	4.77	0.19	P24473	GO_CC
Cluster4	microbody part	1	51	154	23120	2.94	0.289	P24473	GO_CC
Cluster4	mitochondrial envelope	31	51	978	23120	14.37	5.68e-30	B0BNE6 D3ZAF6 F1LZW6 G3V6D3 G3V6H5 G3V741 G3V7Y3 O89035 P00507 P11240 P15999 P21913 P29147 P29419 P32089 P32551 P38718 P63031 Q06647 Q3KR86 Q561S0 Q5BJZ3 Q5M9H2 Q5XIH7 Q63362 Q66HF3 Q68FY0 Q6AYS2 Q6PCT8 Q6UPE0 Q920L2	GO_CC
Cluster4	mitochondrial inner membrane	30	51	610	23120	22.3	1.47e-34	B0BNE6 D3ZAF6 F1LZW6 G3V6D3 G3V6H5 G3V741 G3V7Y3 O89035 P00507 P11240 P15999 P21913 P29147 P29419 P32089 P32551 P38718 P63031 Q06647 Q3KR86 Q561S0 Q5BJZ3 Q5M9H2 Q5XIH7 Q63362 Q66HF3 Q68FY0 Q6PCT8 Q6UPE0 Q920L2	GO_CC
Cluster4	mitochondrial matrix	17	51	624	23120	12.35	1.09e-14	B0BMW2 B0BNE6 D4ADD7 F1M953 G3V6D3 G3V6P2 G3V734 G3V7Y3 P00507 P04041 P10860 P13086 P17764 P24473 P29147 Q5M9H2 Q66HF3	GO_CC
Cluster4	mitochondrial membrane	31	51	886	23120	15.86	2.74e-31	B0BNE6 D3ZAF6 F1LZW6 G3V6D3 G3V6H5 G3V741 G3V7Y3 O89035 P00507 P11240 P15999 P21913 P29147 P29419 P32089 P32551 P38718 P63031 Q06647 Q3KR86 Q561S0 Q5BJZ3 Q5M9H2 Q5XIH7 Q63362 Q66HF3 Q68FY0 Q6AYS2 Q6PCT8 Q6UPE0 Q920L2	GO_CC
Cluster4	mitochondrial membrane part	21	51	296	23120	32.16	7.1e-27	B0BNE6 D3ZAF6 G3V6D3 G3V7Y3 P11240 P15999 P21913 P29147 P29419 P32551 P38718 P63031 Q06647 Q3KR86 Q561S0 Q5BJZ3 Q63362 Q66HF3 Q68FY0 Q6PCT8 Q920L2	GO_CC
Cluster4	mitochondrial nucleoid	4	51	69	23120	26.28	1.63e-05	B0BMW2 F1M953 G3V6D3 Q5M9H2	GO_CC
Cluster4	mitochondrial part	41	51	1374	23120	13.53	2.2e-41	B0BMW2 B0BNE6 D3ZAF6 D4ADD7 F1LZW6 F1M953 G3V6D3 G3V6H5 G3V6P2 G3V734 G3V741 G3V7Y3 O89035 P00507 P04041 P10860 P11240 P13086 P15999 P17764 P21913 P24473 P29147 P29419 P32089 P32551 P38718 P63031 Q06647 Q3KR86 Q561S0 Q5BJZ3 Q5M9H2 Q5XIH7 Q63362 Q66HF3 Q68FY0 Q6AYS2 Q6PCT8 Q6UPE0 Q920L2	GO_CC
Cluster4	mitochondrial protein complex	19	51	348	23120	24.75	4.53e-22	B0BMW2 B0BNE6 D3ZAF6 G3V6D3 G3V7Y3 P11240 P13086 P15999 P21913 P29419 P32551 Q06647 Q3KR86 Q561S0 Q63362 Q66HF3 Q68FY0 Q6PCT8 Q920L2	GO_CC
Cluster4	mitochondrial respiratory chain	10	51	105	23120	43.17	2.63e-14	B0BNE6 P11240 P21913 P32551 Q561S0 Q5BJZ3 Q63362 Q68FY0 Q6PCT8 Q920L2	GO_CC
Cluster4	mitochondrial respiratory chain complex I	3	51	65	23120	20.92	0.000401	B0BNE6 Q561S0 Q63362	GO_CC
Cluster4	mitochondrial respiratory chain complex III	2	51	12	23120	75.56	0.00031	P32551 Q68FY0	GO_CC
Cluster4	mitochondrial respiratory chain complex IV	2	51	21	23120	43.17	0.000975	P11240 P32551	GO_CC
Cluster4	mitochondrial ribonuclease P complex	1	51	4	23120	113.33	0.00879	B0BMW2	GO_CC
Cluster4	mitochondrion	42	51	2156	23120	8.83	4.83e-35	B0BMW2 B0BNE6 D3ZAF6 D4ADD7 F1LZW6 F1M953 G3V6D3 G3V6H5 G3V6P2 G3V734 G3V741 G3V7Y3 O89035 P00507 P04041 P10860 P11240 P13086 P15999 P17764 P21913 P24473 P29147 P29419 P32089 P32551 P38718 P63031 Q06647 Q3KR86 Q3KRE0 Q561S0 Q5BJZ3 Q5M9H2 Q5XIH7 Q63362 Q66HF3 Q68FY0 Q6AYS2 Q6PCT8 Q6UPE0 Q920L2	GO_CC
Cluster4	multivesicular body	1	51	70	23120	6.48	0.143	P14562	GO_CC
Cluster4	myelin sheath	13	51	334	23120	17.64	2.75e-13	F1M953 G3V6D3 G3V6P2 G3V741 P00507 P11240 P15999 P32551 Q06647 Q3KR86 Q561S0 Q68FY0 Q920L2	GO_CC
Cluster4	neuron part	4	51	2922	23120	0.62	0.9	D4ADD7 P00507 P14562 P20611	GO_CC
Cluster4	neuron projection	3	51	2424	23120	0.56	0.914	D4ADD7 P14562 P20611	GO_CC
Cluster4	neuronal cell body	3	51	1312	23120	1.04	0.559	D4ADD7 P00507 P14562	GO_CC
Cluster4	non-membrane-bounded organelle	7	51	5595	23120	0.57	0.978	B0BMW2 F1M953 G3V6D3 Q5M9H2 Q6IFW6 Q6IMF3 Q920L2	GO_CC
Cluster4	nuclear lumen	8	51	5718	23120	0.63	0.958	G3V734 O89035 P21913 P29147 P32551 Q5M9H2 Q5XIH7 Q920L2	GO_CC
Cluster4	nuclear matrix	1	51	181	23120	2.5	0.331	Q5XIH7	GO_CC
Cluster4	nuclear part	8	51	6261	23120	0.58	0.982	G3V734 O89035 P21913 P29147 P32551 Q5M9H2 Q5XIH7 Q920L2	GO_CC
Cluster4	nuclear periphery	1	51	237	23120	1.91	0.409	Q5XIH7	GO_CC
Cluster4	nucleoid	4	51	69	23120	26.28	1.63e-05	B0BMW2 F1M953 G3V6D3 Q5M9H2	GO_CC
Cluster4	nucleolus	2	51	1307	23120	0.69	0.792	Q5M9H2 Q920L2	GO_CC
Cluster4	nucleoplasm	5	51	4830	23120	0.47	0.989	G3V734 O89035 P21913 P29147 P32551	GO_CC
Cluster4	nucleus	11	51	9002	23120	0.55	0.997	D4ADD7 G3V6P2 G3V734 O89035 P04041 P21913 P29147 P32551 Q5M9H2 Q5XIH7 Q920L2	GO_CC
Cluster4	organelle	50	51	16911	23120	1.34	2.29e-06	B0BMW2 B0BNE6 D3ZAF6 D4ADD7 F1LZW6 F1M953 G3V6D3 G3V6H5 G3V6P2 G3V734 G3V741 G3V7Y3 G3V887 O89035 P00507 P04041 P10860 P11240 P13086 P14562 P15999 P17764 P20611 P21913 P24473 P29147 P29419 P32089 P32551 P38718 P63031 Q06647 Q3KR86 Q3KRE0 Q4FZY1 Q561S0 Q5BJZ3 Q5M9H2 Q5XIH7 Q63362 Q66HF3 Q68FY0 Q6AYS2 Q6IFW6 Q6IMF3 Q6P7S1 Q6PCT8 Q6UPE0 Q920L2 Q9Z2Q7	GO_CC
Cluster4	organelle envelope	31	51	1667	23120	8.43	5.69e-23	B0BNE6 D3ZAF6 F1LZW6 G3V6D3 G3V6H5 G3V741 G3V7Y3 O89035 P00507 P11240 P15999 P21913 P29147 P29419 P32089 P32551 P38718 P63031 Q06647 Q3KR86 Q561S0 Q5BJZ3 Q5M9H2 Q5XIH7 Q63362 Q66HF3 Q68FY0 Q6AYS2 Q6PCT8 Q6UPE0 Q920L2	GO_CC
Cluster4	organelle inner membrane	30	51	686	23120	19.83	5.05e-33	B0BNE6 D3ZAF6 F1LZW6 G3V6D3 G3V6H5 G3V741 G3V7Y3 O89035 P00507 P11240 P15999 P21913 P29147 P29419 P32089 P32551 P38718 P63031 Q06647 Q3KR86 Q561S0 Q5BJZ3 Q5M9H2 Q5XIH7 Q63362 Q66HF3 Q68FY0 Q6PCT8 Q6UPE0 Q920L2	GO_CC
Cluster4	organelle lumen	25	51	7443	23120	1.52	0.00907	B0BMW2 B0BNE6 D4ADD7 F1M953 G3V6D3 G3V6P2 G3V734 G3V7Y3 O89035 P00507 P04041 P10860 P13086 P17764 P20611 P21913 P24473 P29147 P32551 Q5M9H2 Q5XIH7 Q66HF3 Q6IMF3 Q6P7S1 Q920L2	GO_CC
Cluster4	organelle membrane	35	51	3708	23120	4.28	6.47e-17	B0BNE6 D3ZAF6 F1LZW6 G3V6D3 G3V6H5 G3V741 G3V7Y3 G3V887 O89035 P00507 P11240 P14562 P15999 P21913 P29147 P29419 P32089 P32551 P38718 P63031 Q06647 Q3KR86 Q4FZY1 Q561S0 Q5BJZ3 Q5M9H2 Q5XIH7 Q63362 Q66HF3 Q68FY0 Q6AYS2 Q6PCT8 Q6UPE0 Q920L2 Q9Z2Q7	GO_CC
Cluster4	organelle part	49	51	12887	23120	1.72	9.24e-11	B0BMW2 B0BNE6 D3ZAF6 D4ADD7 F1LZW6 F1M953 G3V6D3 G3V6H5 G3V6P2 G3V734 G3V741 G3V7Y3 G3V887 O89035 P00507 P04041 P10860 P11240 P13086 P14562 P15999 P17764 P20611 P21913 P24473 P29147 P29419 P32089 P32551 P38718 P63031 Q06647 Q3KR86 Q4FZY1 Q561S0 Q5BJZ3 Q5M9H2 Q5XIH7 Q63362 Q66HF3 Q68FY0 Q6AYS2 Q6IFW6 Q6IMF3 Q6P7S1 Q6PCT8 Q6UPE0 Q920L2 Q9Z2Q7	GO_CC
Cluster4	organelle subcompartment	1	51	2202	23120	0.21	0.994	Q9Z2Q7	GO_CC
Cluster4	oxidoreductase complex	10	51	153	23120	29.63	1.21e-12	B0BNE6 G3V6P2 P21913 P32551 Q561S0 Q63362 Q66HF3 Q68FY0 Q6PCT8 Q920L2	GO_CC
Cluster4	oxoglutarate dehydrogenase complex	1	51	8	23120	56.67	0.0175	G3V6P2	GO_CC
Cluster4	perikaryon	1	51	263	23120	1.72	0.442	P00507	GO_CC
Cluster4	perinuclear region of cytoplasm	2	51	1125	23120	0.81	0.717	P14562 Q9Z2Q7	GO_CC
Cluster4	peroxisomal matrix	1	51	95	23120	4.77	0.19	P24473	GO_CC
Cluster4	peroxisomal part	1	51	154	23120	2.94	0.289	P24473	GO_CC
Cluster4	peroxisome	1	51	235	23120	1.93	0.406	P24473	GO_CC
Cluster4	phagocytic vesicle	3	51	224	23120	6.07	0.0133	G3V887 P14562 Q9Z2Q7	GO_CC
Cluster4	phagocytic vesicle membrane	2	51	98	23120	9.25	0.0198	G3V887 P14562	GO_CC
Cluster4	phagolysosome	1	51	9	23120	50.37	0.0197	P14562	GO_CC
Cluster4	phagolysosome membrane	1	51	5	23120	90.67	0.011	P14562	GO_CC
Cluster4	pigment granule	1	51	69	23120	6.57	0.142	P14562	GO_CC
Cluster4	plasma membrane	16	51	7649	23120	0.95	0.653	B0BMW2 F1LZW6 G3V6D3 G3V6H5 G3V6P2 G3V887 P00507 P13086 P14562 P15999 P21913 Q06647 Q4FZY1 Q6IFW6 Q6IMF3 Q9Z2Q7	GO_CC
Cluster4	plasma membrane part	6	51	4286	23120	0.63	0.93	F1LZW6 G3V6H5 G3V887 P00507 P14562 Q9Z2Q7	GO_CC
Cluster4	plasma membrane raft	1	51	201	23120	2.26	0.36	P14562	GO_CC
Cluster4	plasma membrane region	2	51	1775	23120	0.51	0.911	G3V887 P14562	GO_CC
Cluster4	polymeric cytoskeletal fiber	2	51	607	23120	1.49	0.389	Q6IFW6 Q6IMF3	GO_CC
Cluster4	presynapse	1	51	725	23120	0.63	0.803	P14562	GO_CC
Cluster4	proton-transporting ATP synthase complex	6	51	31	23120	87.74	6e-11	D3ZAF6 G3V6D3 G3V7Y3 P15999 P29419 Q06647	GO_CC
Cluster4	proton-transporting V-type ATPase complex	1	51	32	23120	14.17	0.0683	G3V887	GO_CC
Cluster4	proton-transporting two-sector ATPase complex	7	51	69	23120	45.99	1.61e-10	D3ZAF6 G3V6D3 G3V7Y3 G3V887 P15999 P29419 Q06647	GO_CC
Cluster4	recycling endosome	1	51	234	23120	1.94	0.405	Q9Z2Q7	GO_CC
Cluster4	respiratory chain	10	51	110	23120	41.21	4.25e-14	B0BNE6 P11240 P21913 P32551 Q561S0 Q5BJZ3 Q63362 Q68FY0 Q6PCT8 Q920L2	GO_CC
Cluster4	respiratory chain complex	9	51	105	23120	38.86	1.5e-12	B0BNE6 P11240 P21913 P32551 Q561S0 Q63362 Q68FY0 Q6PCT8 Q920L2	GO_CC
Cluster4	respiratory chain complex I	3	51	65	23120	20.92	0.000401	B0BNE6 Q561S0 Q63362	GO_CC
Cluster4	respiratory chain complex II	3	51	5	23120	272	1.01e-07	P21913 Q6PCT8 Q920L2	GO_CC
Cluster4	respiratory chain complex III	2	51	12	23120	75.56	0.00031	P32551 Q68FY0	GO_CC
Cluster4	respiratory chain complex IV	2	51	26	23120	34.87	0.0015	P11240 P32551	GO_CC
Cluster4	ribonuclease P complex	1	51	15	23120	30.22	0.0326	B0BMW2	GO_CC
Cluster4	ribonucleoprotein complex	1	51	1303	23120	0.35	0.948	B0BMW2	GO_CC
Cluster4	sarcolemma	2	51	297	23120	3.05	0.139	P00507 P14562	GO_CC
Cluster4	secondary lysosome	1	51	32	23120	14.17	0.0683	P14562	GO_CC
Cluster4	secretory granule	4	51	1407	23120	1.29	0.377	G3V887 P14562 Q6IMF3 Q6P7S1	GO_CC
Cluster4	secretory granule membrane	1	51	459	23120	0.99	0.641	G3V887	GO_CC
Cluster4	secretory vesicle	4	51	1691	23120	1.07	0.518	G3V887 P14562 Q6IMF3 Q6P7S1	GO_CC
Cluster4	side of membrane	2	51	970	23120	0.93	0.637	P14562 P29147	GO_CC
Cluster4	somatodendritic compartment	3	51	1779	23120	0.76	0.763	D4ADD7 P00507 P14562	GO_CC
Cluster4	succinate dehydrogenase complex	3	51	5	23120	272	1.01e-07	P21913 Q6PCT8 Q920L2	GO_CC
Cluster4	succinate dehydrogenase complex (ubiquinone)	3	51	5	23120	272	1.01e-07	P21913 Q6PCT8 Q920L2	GO_CC
Cluster4	succinate-CoA ligase complex	1	51	3	23120	151.11	0.0066	P13086	GO_CC
Cluster4	succinate-CoA ligase complex (GDP-forming)	1	51	3	23120	151.11	0.0066	P13086	GO_CC
Cluster4	supramolecular complex	2	51	1056	23120	0.86	0.683	Q6IFW6 Q6IMF3	GO_CC
Cluster4	supramolecular fiber	2	51	1042	23120	0.87	0.676	Q6IFW6 Q6IMF3	GO_CC
Cluster4	supramolecular polymer	2	51	1052	23120	0.86	0.681	Q6IFW6 Q6IMF3	GO_CC
Cluster4	synapse	1	51	1614	23120	0.28	0.975	P14562	GO_CC
Cluster4	synapse part	1	51	1375	23120	0.33	0.956	P14562	GO_CC
Cluster4	synaptic vesicle	1	51	340	23120	1.33	0.531	P14562	GO_CC
Cluster4	tertiary granule	2	51	211	23120	4.3	0.079	G3V887 Q6P7S1	GO_CC
Cluster4	tertiary granule lumen	1	51	72	23120	6.3	0.147	Q6P7S1	GO_CC
Cluster4	trans-Golgi network	1	51	364	23120	1.25	0.555	Q9Z2Q7	GO_CC
Cluster4	transferase complex	1	51	1030	23120	0.44	0.902	G3V6P2	GO_CC
Cluster4	transport vesicle	1	51	598	23120	0.76	0.738	P14562	GO_CC
Cluster4	tricarboxylic acid cycle enzyme complex	2	51	23	23120	39.42	0.00117	G3V6P2 P13086	GO_CC
Cluster4	vacuolar lumen	2	51	273	23120	3.32	0.122	P20611 Q6P7S1	GO_CC
Cluster4	vacuolar membrane	4	51	371	23120	4.89	0.00901	G3V887 P14562 Q4FZY1 Q9Z2Q7	GO_CC
Cluster4	vacuolar part	6	51	629	23120	4.32	0.00252	G3V887 P14562 P20611 Q4FZY1 Q6P7S1 Q9Z2Q7	GO_CC
Cluster4	vacuolar proton-transporting V-type ATPase complex	1	51	30	23120	15.11	0.0641	G3V887	GO_CC
Cluster4	vacuole	6	51	1004	23120	2.71	0.0225	G3V887 P14562 P20611 Q4FZY1 Q6P7S1 Q9Z2Q7	GO_CC
Cluster4	vesicle	7	51	3547	23120	0.89	0.684	G3V887 P14562 P20611 Q4FZY1 Q6IMF3 Q6P7S1 Q9Z2Q7	GO_CC
Cluster4	vesicle membrane	2	51	1018	23120	0.89	0.663	G3V887 P14562	GO_CC
Cluster4	whole membrane	6	51	2235	23120	1.22	0.371	G3V6D3 G3V887 P14562 P15999 Q4FZY1 Q9Z2Q7	GO_CC
Cluster5	9+2 non-motile cilium	1	25	15	23120	61.65	0.0161	Q6RUV5	GO_CC
Cluster5	Golgi apparatus	3	25	2085	23120	1.33	0.395	P04762 Q6RUV5 Q9Z269	GO_CC
Cluster5	Golgi apparatus part	1	25	1189	23120	0.78	0.733	Q6RUV5	GO_CC
Cluster5	Golgi membrane	1	25	739	23120	1.25	0.556	Q6RUV5	GO_CC
Cluster5	Golgi subcompartment	1	25	1010	23120	0.92	0.673	Q6RUV5	GO_CC
Cluster5	Prp19 complex	1	25	16	23120	57.8	0.0172	P63018	GO_CC
Cluster5	actin cytoskeleton	1	25	702	23120	1.32	0.538	Q64119	GO_CC
Cluster5	asymmetric synapse	2	25	518	23120	3.57	0.107	P63018 P63102	GO_CC
Cluster5	autophagosome	1	25	132	23120	7.01	0.133	P63018	GO_CC
Cluster5	axon	1	25	1217	23120	0.76	0.741	P63018	GO_CC
Cluster5	axon part	1	25	825	23120	1.12	0.597	P63018	GO_CC
Cluster5	axon terminus	1	25	354	23120	2.61	0.32	P63018	GO_CC
Cluster5	bounding membrane of organelle	10	25	2525	23120	3.66	0.000165	F7F2H5 O35078 P04762 P59382 P63018 P84817 Q07066 Q6RUV5 Q9ES71 Q9JJK4	GO_CC
Cluster5	brush border	1	25	261	23120	3.54	0.247	Q64119	GO_CC
Cluster5	catalytic complex	1	25	1847	23120	0.5	0.875	O35077	GO_CC
Cluster5	cell	25	25	22194	23120	1.04	0.36	B0BNF9 F1M9A7 F7F2H5 O35077 O35078 O35796 P04762 P09118 P21775 P57113 P59382 P63018 P63102 P80299 P84817 Q07066 Q3MIB4 Q5M884 Q64119 Q6P7C7 Q6RUV5 Q8CHM7 Q9ES71 Q9JJK4 Q9Z269	GO_CC
Cluster5	cell body	1	25	1440	23120	0.64	0.8	P63018	GO_CC
Cluster5	cell leading edge	2	25	668	23120	2.77	0.162	P63102 Q6RUV5	GO_CC
Cluster5	cell part	25	25	22192	23120	1.04	0.359	B0BNF9 F1M9A7 F7F2H5 O35077 O35078 O35796 P04762 P09118 P21775 P57113 P59382 P63018 P63102 P80299 P84817 Q07066 Q3MIB4 Q5M884 Q64119 Q6P7C7 Q6RUV5 Q8CHM7 Q9ES71 Q9JJK4 Q9Z269	GO_CC
Cluster5	cell periphery	6	25	7854	23120	0.71	0.9	O35796 P04762 P63018 Q6P7C7 Q6RUV5 Q9JJK4	GO_CC
Cluster5	cell projection	2	25	3626	23120	0.51	0.921	P63018 Q6RUV5	GO_CC
Cluster5	cell projection membrane	1	25	565	23120	1.64	0.461	Q6RUV5	GO_CC
Cluster5	cell projection part	2	25	2587	23120	0.71	0.787	P63018 Q6RUV5	GO_CC
Cluster5	cell surface	2	25	1464	23120	1.26	0.476	O35796 P63018	GO_CC
Cluster5	centrosome	1	25	716	23120	1.29	0.545	Q6RUV5	GO_CC
Cluster5	chaperone complex	1	25	27	23120	34.25	0.0288	P63018	GO_CC
Cluster5	cilium	1	25	893	23120	1.04	0.627	Q6RUV5	GO_CC
Cluster5	clathrin-coated vesicle	1	25	267	23120	3.46	0.252	P63018	GO_CC
Cluster5	clathrin-coated vesicle membrane	1	25	145	23120	6.38	0.146	P63018	GO_CC
Cluster5	clathrin-sculpted vesicle	1	25	18	23120	51.38	0.0193	P63018	GO_CC
Cluster5	cluster of actin-based cell projections	2	25	333	23120	5.55	0.0499	Q64119 Q6RUV5	GO_CC
Cluster5	coated vesicle	1	25	381	23120	2.43	0.34	P63018	GO_CC
Cluster5	coated vesicle membrane	1	25	217	23120	4.26	0.21	P63018	GO_CC
Cluster5	cytoplasm	24	25	16001	23120	1.39	0.00122	B0BNF9 F1M9A7 F7F2H5 O35077 O35078 O35796 P04762 P09118 P21775 P57113 P59382 P63018 P63102 P80299 P84817 Q07066 Q3MIB4 Q5M884 Q6P7C7 Q6RUV5 Q8CHM7 Q9ES71 Q9JJK4 Q9Z269	GO_CC
Cluster5	cytoplasmic part	24	25	13935	23120	1.59	5.53e-05	B0BNF9 F1M9A7 F7F2H5 O35077 O35078 O35796 P04762 P09118 P21775 P57113 P59382 P63018 P63102 P80299 P84817 Q07066 Q3MIB4 Q5M884 Q6P7C7 Q6RUV5 Q8CHM7 Q9ES71 Q9JJK4 Q9Z269	GO_CC
Cluster5	cytoplasmic ribonucleoprotein granule	1	25	303	23120	3.05	0.281	Q6RUV5	GO_CC
Cluster5	cytoplasmic vesicle	6	25	3343	23120	1.66	0.142	P04762 P21775 P63018 P63102 Q6P7C7 Q6RUV5	GO_CC
Cluster5	cytoplasmic vesicle lumen	3	25	513	23120	5.41	0.0174	P04762 P21775 P63018	GO_CC
Cluster5	cytoplasmic vesicle membrane	1	25	980	23120	0.94	0.662	P63018	GO_CC
Cluster5	cytoplasmic vesicle part	4	25	1929	23120	1.92	0.151	P04762 P21775 P63018 Q6RUV5	GO_CC
Cluster5	cytoskeletal part	3	25	2092	23120	1.33	0.397	P63018 Q64119 Q6RUV5	GO_CC
Cluster5	cytoskeleton	3	25	2763	23120	1	0.588	P63018 Q64119 Q6RUV5	GO_CC
Cluster5	cytosol	19	25	7526	23120	2.33	1.05e-05	B0BNF9 F1M9A7 F7F2H5 O35077 O35078 O35796 P04762 P09118 P21775 P57113 P63018 P63102 P80299 Q3MIB4 Q5M884 Q6RUV5 Q8CHM7 Q9ES71 Q9JJK4	GO_CC
Cluster5	cytosolic part	1	25	490	23120	1.89	0.415	P63018	GO_CC
Cluster5	dendrite	2	25	1216	23120	1.52	0.381	P63018 Q6RUV5	GO_CC
Cluster5	dendritic shaft	1	25	151	23120	6.12	0.151	P63018	GO_CC
Cluster5	dendritic spine	2	25	354	23120	5.22	0.0556	P63018 Q6RUV5	GO_CC
Cluster5	dendritic tree	2	25	1218	23120	1.52	0.382	P63018 Q6RUV5	GO_CC
Cluster5	early endosome	1	25	433	23120	2.14	0.377	Q6RUV5	GO_CC
Cluster5	early endosome membrane	1	25	96	23120	9.63	0.0988	Q6RUV5	GO_CC
Cluster5	endomembrane system	7	25	6551	23120	0.99	0.59	F7F2H5 P04762 P21775 P63018 Q6RUV5 Q9JJK4 Q9Z269	GO_CC
Cluster5	endoplasmic reticulum	3	25	2777	23120	1	0.592	P04762 Q9JJK4 Q9Z269	GO_CC
Cluster5	endoplasmic reticulum membrane	1	25	1402	23120	0.66	0.791	Q9Z269	GO_CC
Cluster5	endoplasmic reticulum part	1	25	1887	23120	0.49	0.881	Q9Z269	GO_CC
Cluster5	endoplasmic reticulum subcompartment	1	25	1420	23120	0.65	0.795	Q9Z269	GO_CC
Cluster5	endosomal part	1	25	560	23120	1.65	0.458	Q6RUV5	GO_CC
Cluster5	endosome	2	25	1306	23120	1.42	0.417	P63018 Q6RUV5	GO_CC
Cluster5	endosome membrane	1	25	441	23120	2.1	0.382	Q6RUV5	GO_CC
Cluster5	envelope	3	25	1668	23120	1.66	0.268	F7F2H5 P04762 P84817	GO_CC
Cluster5	exocytic vesicle	1	25	390	23120	2.37	0.347	P63018	GO_CC
Cluster5	extracellular exosome	1	25	153	23120	6.04	0.153	P63018	GO_CC
Cluster5	extracellular organelle	1	25	190	23120	4.87	0.186	P63018	GO_CC
Cluster5	extracellular region	4	25	3362	23120	1.1	0.503	O35796 P04762 P21775 P63018	GO_CC
Cluster5	extracellular region part	3	25	2407	23120	1.15	0.491	O35796 P04762 P63018	GO_CC
Cluster5	extracellular space	3	25	2024	23120	1.37	0.376	O35796 P04762 P63018	GO_CC
Cluster5	extracellular vesicle	1	25	174	23120	5.31	0.172	P63018	GO_CC
Cluster5	extrinsic component of membrane	1	25	453	23120	2.04	0.39	Q6RUV5	GO_CC
Cluster5	extrinsic component of plasma membrane	1	25	268	23120	3.45	0.253	Q6RUV5	GO_CC
Cluster5	ficolin-1-rich granule	2	25	267	23120	6.93	0.0335	P04762 P63018	GO_CC
Cluster5	ficolin-1-rich granule lumen	2	25	189	23120	9.79	0.0176	P04762 P63018	GO_CC
Cluster5	glycerol-3-phosphate dehydrogenase complex	1	25	5	23120	184.96	0.0054	O35077	GO_CC
Cluster5	integral component of membrane	4	25	4152	23120	0.89	0.681	P84817 Q07066 Q6P7C7 Q9JJK4	GO_CC
Cluster5	integral component of mitochondrial membrane	1	25	95	23120	9.73	0.0979	P84817	GO_CC
Cluster5	integral component of mitochondrial outer membrane	1	25	40	23120	23.12	0.0424	P84817	GO_CC
Cluster5	integral component of organelle membrane	3	25	251	23120	11.05	0.00244	P84817 Q07066 Q9JJK4	GO_CC
Cluster5	integral component of peroxisomal membrane	3	25	24	23120	115.6	2.23e-06	P84817 Q07066 Q9JJK4	GO_CC
Cluster5	integral component of plasma membrane	2	25	2463	23120	0.75	0.762	Q6P7C7 Q9JJK4	GO_CC
Cluster5	intermediate filament	1	25	129	23120	7.17	0.131	P63018	GO_CC
Cluster5	intermediate filament cytoskeleton	1	25	210	23120	4.4	0.204	P63018	GO_CC
Cluster5	intracellular	25	25	19286	23120	1.2	0.0107	B0BNF9 F1M9A7 F7F2H5 O35077 O35078 O35796 P04762 P09118 P21775 P57113 P59382 P63018 P63102 P80299 P84817 Q07066 Q3MIB4 Q5M884 Q64119 Q6P7C7 Q6RUV5 Q8CHM7 Q9ES71 Q9JJK4 Q9Z269	GO_CC
Cluster5	intracellular membrane-bounded organelle	22	25	14035	23120	1.45	0.00291	B0BNF9 F1M9A7 F7F2H5 O35078 O35796 P04762 P09118 P21775 P57113 P59382 P63018 P63102 P80299 P84817 Q07066 Q3MIB4 Q5M884 Q6RUV5 Q8CHM7 Q9ES71 Q9JJK4 Q9Z269	GO_CC
Cluster5	intracellular non-membrane-bounded organelle	3	25	5595	23120	0.5	0.961	P63018 Q64119 Q6RUV5	GO_CC
Cluster5	intracellular organelle	24	25	16534	23120	1.34	0.0025	B0BNF9 F1M9A7 F7F2H5 O35078 O35796 P04762 P09118 P21775 P57113 P59382 P63018 P63102 P80299 P84817 Q07066 Q3MIB4 Q5M884 Q64119 Q6P7C7 Q6RUV5 Q8CHM7 Q9ES71 Q9JJK4 Q9Z269	GO_CC
Cluster5	intracellular organelle lumen	14	25	7436	23120	1.74	0.0117	B0BNF9 F1M9A7 O35078 P04762 P09118 P21775 P57113 P63018 P80299 Q3MIB4 Q5M884 Q8CHM7 Q9ES71 Q9JJK4	GO_CC
Cluster5	intracellular organelle part	21	25	12485	23120	1.56	0.00169	B0BNF9 F1M9A7 F7F2H5 O35078 P04762 P09118 P21775 P57113 P59382 P63018 P80299 P84817 Q07066 Q3MIB4 Q5M884 Q64119 Q6RUV5 Q8CHM7 Q9ES71 Q9JJK4 Q9Z269	GO_CC
Cluster5	intracellular part	25	25	19175	23120	1.21	0.00928	B0BNF9 F1M9A7 F7F2H5 O35077 O35078 O35796 P04762 P09118 P21775 P57113 P59382 P63018 P63102 P80299 P84817 Q07066 Q3MIB4 Q5M884 Q64119 Q6P7C7 Q6RUV5 Q8CHM7 Q9ES71 Q9JJK4 Q9Z269	GO_CC
Cluster5	intracellular vesicle	6	25	3355	23120	1.65	0.144	P04762 P21775 P63018 P63102 Q6P7C7 Q6RUV5	GO_CC
Cluster5	intrinsic component of membrane	4	25	4327	23120	0.85	0.715	P84817 Q07066 Q6P7C7 Q9JJK4	GO_CC
Cluster5	intrinsic component of mitochondrial membrane	1	25	100	23120	9.25	0.103	P84817	GO_CC
Cluster5	intrinsic component of organelle membrane	3	25	277	23120	10.02	0.00322	P84817 Q07066 Q9JJK4	GO_CC
Cluster5	intrinsic component of peroxisomal membrane	3	25	25	23120	110.98	2.53e-06	P84817 Q07066 Q9JJK4	GO_CC
Cluster5	intrinsic component of plasma membrane	2	25	2585	23120	0.72	0.786	Q6P7C7 Q9JJK4	GO_CC
Cluster5	kinocilium	1	25	15	23120	61.65	0.0161	Q6RUV5	GO_CC
Cluster5	lamellipodium	1	25	317	23120	2.92	0.292	Q6RUV5	GO_CC
Cluster5	late endosome	1	25	325	23120	2.85	0.298	P63018	GO_CC
Cluster5	leading edge membrane	1	25	257	23120	3.6	0.244	Q6RUV5	GO_CC
Cluster5	lumenal side of lysosomal membrane	1	25	5	23120	184.96	0.0054	P63018	GO_CC
Cluster5	lumenal side of membrane	1	25	11	23120	84.07	0.0118	P63018	GO_CC
Cluster5	lysosomal lumen	1	25	144	23120	6.42	0.145	P63018	GO_CC
Cluster5	lysosomal matrix	1	25	6	23120	154.13	0.00647	P63018	GO_CC
Cluster5	lysosomal membrane	1	25	302	23120	3.06	0.28	P63018	GO_CC
Cluster5	lysosome	2	25	861	23120	2.15	0.238	P04762 P63018	GO_CC
Cluster5	lytic vacuole	2	25	861	23120	2.15	0.238	P04762 P63018	GO_CC
Cluster5	lytic vacuole membrane	1	25	302	23120	3.06	0.28	P63018	GO_CC
Cluster5	macromolecular complex	9	25	7260	23120	1.15	0.381	O35077 O35796 P63018 P63102 P84817 Q07066 Q64119 Q6RUV5 Q9JJK4	GO_CC
Cluster5	melanosome	3	25	69	23120	40.21	5.58e-05	P63018 P63102 Q6P7C7	GO_CC
Cluster5	membrane	13	25	11118	23120	1.08	0.423	F7F2H5 O35078 O35796 P04762 P59382 P63018 P84817 Q07066 Q6P7C7 Q6RUV5 Q9ES71 Q9JJK4 Q9Z269	GO_CC
Cluster5	membrane microdomain	1	25	654	23120	1.41	0.512	P63018	GO_CC
Cluster5	membrane part	8	25	7202	23120	1.03	0.538	F7F2H5 P63018 P84817 Q07066 Q6P7C7 Q6RUV5 Q9JJK4 Q9Z269	GO_CC
Cluster5	membrane raft	1	25	654	23120	1.41	0.512	P63018	GO_CC
Cluster5	membrane region	1	25	676	23120	1.37	0.524	P63018	GO_CC
Cluster5	membrane-bounded organelle	23	25	15308	23120	1.39	0.00305	B0BNF9 F1M9A7 F7F2H5 O35078 O35796 P04762 P09118 P21775 P57113 P59382 P63018 P63102 P80299 P84817 Q07066 Q3MIB4 Q5M884 Q6P7C7 Q6RUV5 Q8CHM7 Q9ES71 Q9JJK4 Q9Z269	GO_CC
Cluster5	membrane-enclosed lumen	14	25	7443	23120	1.74	0.0118	B0BNF9 F1M9A7 O35078 P04762 P09118 P21775 P57113 P63018 P80299 Q3MIB4 Q5M884 Q8CHM7 Q9ES71 Q9JJK4	GO_CC
Cluster5	messenger ribonucleoprotein complex	1	25	29	23120	31.89	0.0309	P63018	GO_CC
Cluster5	microbody	15	25	235	23120	59.03	2.43e-24	B0BNF9 F1M9A7 O35078 P04762 P09118 P21775 P59382 P80299 P84817 Q07066 Q3MIB4 Q5M884 Q8CHM7 Q9ES71 Q9JJK4	GO_CC
Cluster5	microbody lumen	11	25	95	23120	107.08	1.32e-20	B0BNF9 F1M9A7 O35078 P04762 P09118 P21775 P80299 Q3MIB4 Q5M884 Q8CHM7 Q9ES71	GO_CC
Cluster5	microbody membrane	7	25	80	23120	80.92	2.08e-12	O35078 P04762 P59382 P84817 Q07066 Q9ES71 Q9JJK4	GO_CC
Cluster5	microbody part	15	25	154	23120	90.08	3.46e-27	B0BNF9 F1M9A7 O35078 P04762 P09118 P21775 P59382 P80299 P84817 Q07066 Q3MIB4 Q5M884 Q8CHM7 Q9ES71 Q9JJK4	GO_CC
Cluster5	microtubule	1	25	328	23120	2.82	0.301	P63018	GO_CC
Cluster5	microtubule cytoskeleton	2	25	1640	23120	1.13	0.538	P63018 Q6RUV5	GO_CC
Cluster5	microtubule organizing center	1	25	977	23120	0.95	0.66	Q6RUV5	GO_CC
Cluster5	microtubule organizing center part	1	25	238	23120	3.89	0.228	Q6RUV5	GO_CC
Cluster5	mitochondrial envelope	2	25	978	23120	1.89	0.286	P04762 P84817	GO_CC
Cluster5	mitochondrial intermembrane space	1	25	141	23120	6.56	0.142	P04762	GO_CC
Cluster5	mitochondrial matrix	1	25	624	23120	1.48	0.496	P57113	GO_CC
Cluster5	mitochondrial membrane	1	25	886	23120	1.04	0.624	P84817	GO_CC
Cluster5	mitochondrial membrane part	1	25	296	23120	3.12	0.276	P84817	GO_CC
Cluster5	mitochondrial outer membrane	1	25	245	23120	3.77	0.234	P84817	GO_CC
Cluster5	mitochondrial part	3	25	1374	23120	2.02	0.183	P04762 P57113 P84817	GO_CC
Cluster5	mitochondrion	7	25	2156	23120	3	0.00647	O35796 P04762 P57113 P63102 P84817 Q5M884 Q9ES71	GO_CC
Cluster5	myelin sheath	1	25	334	23120	2.77	0.305	P63018	GO_CC
Cluster5	myosin complex	1	25	78	23120	11.86	0.0811	Q64119	GO_CC
Cluster5	neuron part	3	25	2922	23120	0.95	0.628	P63018 P63102 Q6RUV5	GO_CC
Cluster5	neuron projection	2	25	2424	23120	0.76	0.754	P63018 Q6RUV5	GO_CC
Cluster5	neuron projection terminus	1	25	387	23120	2.39	0.344	P63018	GO_CC
Cluster5	neuron spine	2	25	359	23120	5.15	0.057	P63018 Q6RUV5	GO_CC
Cluster5	neuron to neuron synapse	2	25	525	23120	3.52	0.11	P63018 P63102	GO_CC
Cluster5	neuronal cell body	1	25	1312	23120	0.7	0.768	P63018	GO_CC
Cluster5	non-membrane-bounded organelle	3	25	5595	23120	0.5	0.961	P63018 Q64119 Q6RUV5	GO_CC
Cluster5	non-motile cilium	1	25	211	23120	4.38	0.205	Q6RUV5	GO_CC
Cluster5	nuclear envelope	1	25	726	23120	1.27	0.55	F7F2H5	GO_CC
Cluster5	nuclear lumen	3	25	5718	23120	0.49	0.966	P63018 Q5M884 Q9JJK4	GO_CC
Cluster5	nuclear membrane	1	25	467	23120	1.98	0.4	F7F2H5	GO_CC
Cluster5	nuclear outer membrane	1	25	45	23120	20.55	0.0476	F7F2H5	GO_CC
Cluster5	nuclear part	4	25	6261	23120	0.59	0.937	F7F2H5 P63018 Q5M884 Q9JJK4	GO_CC
Cluster5	nucleolus	1	25	1307	23120	0.71	0.767	P63018	GO_CC
Cluster5	nucleoplasm	3	25	4830	23120	0.57	0.919	P63018 Q5M884 Q9JJK4	GO_CC
Cluster5	nucleus	8	25	9002	23120	0.82	0.82	F7F2H5 O35796 P63018 P63102 Q3MIB4 Q5M884 Q6RUV5 Q9JJK4	GO_CC
Cluster5	organelle	24	25	16911	23120	1.31	0.00408	B0BNF9 F1M9A7 F7F2H5 O35078 O35796 P04762 P09118 P21775 P57113 P59382 P63018 P63102 P80299 P84817 Q07066 Q3MIB4 Q5M884 Q64119 Q6P7C7 Q6RUV5 Q8CHM7 Q9ES71 Q9JJK4 Q9Z269	GO_CC
Cluster5	organelle envelope	3	25	1667	23120	1.66	0.268	F7F2H5 P04762 P84817	GO_CC
Cluster5	organelle envelope lumen	1	25	159	23120	5.82	0.159	P04762	GO_CC
Cluster5	organelle lumen	14	25	7443	23120	1.74	0.0118	B0BNF9 F1M9A7 O35078 P04762 P09118 P21775 P57113 P63018 P80299 Q3MIB4 Q5M884 Q8CHM7 Q9ES71 Q9JJK4	GO_CC
Cluster5	organelle membrane	10	25	3708	23120	2.49	0.00354	F7F2H5 O35078 P04762 P59382 P63018 P84817 Q07066 Q6RUV5 Q9ES71 Q9JJK4	GO_CC
Cluster5	organelle outer membrane	2	25	290	23120	6.38	0.0389	F7F2H5 P84817	GO_CC
Cluster5	organelle part	21	25	12887	23120	1.51	0.00287	B0BNF9 F1M9A7 F7F2H5 O35078 P04762 P09118 P21775 P57113 P59382 P63018 P80299 P84817 Q07066 Q3MIB4 Q5M884 Q64119 Q6RUV5 Q8CHM7 Q9ES71 Q9JJK4 Q9Z269	GO_CC
Cluster5	organelle subcompartment	2	25	2202	23120	0.84	0.703	Q6RUV5 Q9Z269	GO_CC
Cluster5	outer membrane	2	25	296	23120	6.25	0.0404	F7F2H5 P84817	GO_CC
Cluster5	oxidoreductase complex	1	25	153	23120	6.04	0.153	O35077	GO_CC
Cluster5	pericentriolar material	1	25	34	23120	27.2	0.0361	Q6RUV5	GO_CC
Cluster5	perikaryon	1	25	263	23120	3.52	0.249	P63018	GO_CC
Cluster5	perinuclear region of cytoplasm	2	25	1125	23120	1.64	0.345	P63018 P63102	GO_CC
Cluster5	peroxisomal matrix	11	25	95	23120	107.08	1.32e-20	B0BNF9 F1M9A7 O35078 P04762 P09118 P21775 P80299 Q3MIB4 Q5M884 Q8CHM7 Q9ES71	GO_CC
Cluster5	peroxisomal membrane	7	25	80	23120	80.92	2.08e-12	O35078 P04762 P59382 P84817 Q07066 Q9ES71 Q9JJK4	GO_CC
Cluster5	peroxisomal part	15	25	154	23120	90.08	3.46e-27	B0BNF9 F1M9A7 O35078 P04762 P09118 P21775 P59382 P80299 P84817 Q07066 Q3MIB4 Q5M884 Q8CHM7 Q9ES71 Q9JJK4	GO_CC
Cluster5	peroxisome	15	25	235	23120	59.03	2.43e-24	B0BNF9 F1M9A7 O35078 P04762 P09118 P21775 P59382 P80299 P84817 Q07066 Q3MIB4 Q5M884 Q8CHM7 Q9ES71 Q9JJK4	GO_CC
Cluster5	phagocytic cup	1	25	34	23120	27.2	0.0361	Q6RUV5	GO_CC
Cluster5	photoreceptor inner segment	1	25	77	23120	12.01	0.0801	P63018	GO_CC
Cluster5	pigment granule	3	25	69	23120	40.21	5.58e-05	P63018 P63102 Q6P7C7	GO_CC
Cluster5	plasma membrane	6	25	7649	23120	0.73	0.883	O35796 P04762 P63018 Q6P7C7 Q6RUV5 Q9JJK4	GO_CC
Cluster5	plasma membrane part	3	25	4286	23120	0.65	0.868	Q6P7C7 Q6RUV5 Q9JJK4	GO_CC
Cluster5	plasma membrane region	1	25	1775	23120	0.52	0.864	Q6RUV5	GO_CC
Cluster5	polymeric cytoskeletal fiber	1	25	607	23120	1.52	0.486	P63018	GO_CC
Cluster5	postsynapse	3	25	881	23120	3.15	0.0681	P63018 P63102 Q6RUV5	GO_CC
Cluster5	postsynaptic cytosol	1	25	9	23120	102.76	0.00969	P63018	GO_CC
Cluster5	postsynaptic density	2	25	510	23120	3.63	0.104	P63018 P63102	GO_CC
Cluster5	postsynaptic specialization	2	25	514	23120	3.6	0.106	P63018 P63102	GO_CC
Cluster5	presynapse	1	25	725	23120	1.28	0.549	P63018	GO_CC
Cluster5	presynaptic cytosol	1	25	5	23120	184.96	0.0054	P63018	GO_CC
Cluster5	protein-lipid complex	1	25	42	23120	22.02	0.0445	Q9JJK4	GO_CC
Cluster5	recycling endosome	1	25	234	23120	3.95	0.225	Q6RUV5	GO_CC
Cluster5	recycling endosome membrane	1	25	80	23120	11.56	0.083	Q6RUV5	GO_CC
Cluster5	region of cytosol	1	25	9	23120	102.76	0.00969	P63018	GO_CC
Cluster5	ribonucleoprotein complex	2	25	1303	23120	1.42	0.415	P63018 Q6RUV5	GO_CC
Cluster5	ribonucleoprotein granule	1	25	323	23120	2.86	0.297	Q6RUV5	GO_CC
Cluster5	ruffle	1	25	286	23120	3.23	0.268	Q6RUV5	GO_CC
Cluster5	ruffle membrane	1	25	133	23120	6.95	0.134	Q6RUV5	GO_CC
Cluster5	secretory granule	3	25	1407	23120	1.97	0.193	P04762 P21775 P63018	GO_CC
Cluster5	secretory granule lumen	3	25	487	23120	5.7	0.0151	P04762 P21775 P63018	GO_CC
Cluster5	secretory vesicle	3	25	1691	23120	1.64	0.275	P04762 P21775 P63018	GO_CC
Cluster5	side of membrane	1	25	970	23120	0.95	0.658	P63018	GO_CC
Cluster5	somatodendritic compartment	2	25	1779	23120	1.04	0.583	P63018 Q6RUV5	GO_CC
Cluster5	specific granule	1	25	239	23120	3.87	0.229	P21775	GO_CC
Cluster5	specific granule lumen	1	25	87	23120	10.63	0.09	P21775	GO_CC
Cluster5	stereocilium bundle	1	25	84	23120	11.01	0.087	Q6RUV5	GO_CC
Cluster5	supramolecular complex	1	25	1056	23120	0.88	0.689	P63018	GO_CC
Cluster5	supramolecular fiber	1	25	1042	23120	0.89	0.684	P63018	GO_CC
Cluster5	supramolecular polymer	1	25	1052	23120	0.88	0.688	P63018	GO_CC
Cluster5	synapse	3	25	1614	23120	1.72	0.252	P63018 P63102 Q6RUV5	GO_CC
Cluster5	synapse part	3	25	1375	23120	2.02	0.184	P63018 P63102 Q6RUV5	GO_CC
Cluster5	synaptic vesicle	1	25	340	23120	2.72	0.31	P63018	GO_CC
Cluster5	terminal bouton	1	25	227	23120	4.07	0.219	P63018	GO_CC
Cluster5	trans-Golgi network	1	25	364	23120	2.54	0.328	Q6RUV5	GO_CC
Cluster5	transport vesicle	1	25	598	23120	1.55	0.481	P63018	GO_CC
Cluster5	unconventional myosin complex	1	25	17	23120	54.4	0.0182	Q64119	GO_CC
Cluster5	vacuolar lumen	1	25	273	23120	3.39	0.257	P63018	GO_CC
Cluster5	vacuolar membrane	1	25	371	23120	2.49	0.333	P63018	GO_CC
Cluster5	vacuolar part	1	25	629	23120	1.47	0.498	P63018	GO_CC
Cluster5	vacuole	2	25	1004	23120	1.84	0.296	P04762 P63018	GO_CC
Cluster5	vesicle	6	25	3547	23120	1.56	0.174	P04762 P21775 P63018 P63102 Q6P7C7 Q6RUV5	GO_CC
Cluster5	vesicle lumen	3	25	521	23120	5.33	0.0181	P04762 P21775 P63018	GO_CC
Cluster5	vesicle membrane	1	25	1018	23120	0.91	0.676	P63018	GO_CC
Cluster5	whole membrane	10	25	2235	23120	4.14	5.84e-05	F7F2H5 O35078 P04762 P59382 P63018 P84817 Q07066 Q6RUV5 Q9ES71 Q9JJK4	GO_CC
Cluster6	90S preribosome	1	25	47	23120	19.68	0.0496	P62083	GO_CC
Cluster6	COPI vesicle coat	1	25	19	23120	48.67	0.0204	D3ZTX0	GO_CC
Cluster6	COPI-coated vesicle	2	25	32	23120	57.8	0.000546	D3ZTX0 Q63584	GO_CC
Cluster6	COPI-coated vesicle membrane	1	25	22	23120	42.04	0.0235	D3ZTX0	GO_CC
Cluster6	COPII vesicle coat	2	25	17	23120	108.8	0.000151	B5DFC3 D3ZTX0	GO_CC
Cluster6	ER to Golgi transport vesicle	4	25	94	23120	39.35	3.04e-06	B5DFC3 D3ZTX0 Q62902 Q63584	GO_CC
Cluster6	ER to Golgi transport vesicle membrane	4	25	62	23120	59.66	5.68e-07	B5DFC3 D3ZTX0 Q62902 Q63584	GO_CC
Cluster6	Golgi apparatus	4	25	2085	23120	1.77	0.184	B5DFC3 D3ZTX0 Q62902 Q63584	GO_CC
Cluster6	Golgi apparatus part	4	25	1189	23120	3.11	0.0372	B5DFC3 D3ZTX0 Q62902 Q63584	GO_CC
Cluster6	Golgi membrane	4	25	739	23120	5.01	0.00767	B5DFC3 D3ZTX0 Q62902 Q63584	GO_CC
Cluster6	Golgi subcompartment	4	25	1010	23120	3.66	0.022	B5DFC3 D3ZTX0 Q62902 Q63584	GO_CC
Cluster6	Golgi-associated vesicle	4	25	216	23120	17.13	8.03e-05	B5DFC3 D3ZTX0 Q62902 Q63584	GO_CC
Cluster6	Golgi-associated vesicle membrane	4	25	131	23120	28.24	1.14e-05	B5DFC3 D3ZTX0 Q62902 Q63584	GO_CC
Cluster6	NF-kappaB complex	1	25	3	23120	308.27	0.00324	P62909	GO_CC
Cluster6	azurophil granule	2	25	232	23120	7.97	0.0258	D3ZZC1 Q9R0T3	GO_CC
Cluster6	azurophil granule lumen	2	25	148	23120	12.5	0.0111	D3ZZC1 Q9R0T3	GO_CC
Cluster6	bounding membrane of organelle	5	25	2525	23120	1.83	0.13	B5DFC3 D3ZTX0 P62832 Q62902 Q63584	GO_CC
Cluster6	cell	25	25	22194	23120	1.04	0.36	A0JPQ8 B5DFC3 D3ZFC6 D3ZTX0 D3ZZC1 D4A6G6 G3V6S3 P02761 P13471 P15149 P19945 P24470 P29314 P62083 P62278 P62282 P62832 P62909 Q5XI86 Q62902 Q62930 Q63584 Q63688 Q68G19 Q9R0T3	GO_CC
Cluster6	cell leading edge	1	25	668	23120	1.38	0.52	P62909	GO_CC
Cluster6	cell part	25	25	22192	23120	1.04	0.359	A0JPQ8 B5DFC3 D3ZFC6 D3ZTX0 D3ZZC1 D4A6G6 G3V6S3 P02761 P13471 P15149 P19945 P24470 P29314 P62083 P62278 P62282 P62832 P62909 Q5XI86 Q62902 Q62930 Q63584 Q63688 Q68G19 Q9R0T3	GO_CC
Cluster6	cell periphery	4	25	7854	23120	0.47	0.987	D3ZFC6 P62909 Q62930 Q63584	GO_CC
Cluster6	cell projection	2	25	3626	23120	0.51	0.921	P19945 P62909	GO_CC
Cluster6	cell projection membrane	1	25	565	23120	1.64	0.461	P62909	GO_CC
Cluster6	cell projection part	2	25	2587	23120	0.71	0.787	P19945 P62909	GO_CC
Cluster6	cis-Golgi network	1	25	65	23120	14.23	0.068	Q63584	GO_CC
Cluster6	clathrin-coated vesicle	1	25	267	23120	3.46	0.252	Q63584	GO_CC
Cluster6	coated membrane	2	25	111	23120	16.66	0.00638	B5DFC3 D3ZTX0	GO_CC
Cluster6	coated vesicle	4	25	381	23120	9.71	0.000698	B5DFC3 D3ZTX0 Q62902 Q63584	GO_CC
Cluster6	coated vesicle membrane	4	25	217	23120	17.05	8.18e-05	B5DFC3 D3ZTX0 Q62902 Q63584	GO_CC
Cluster6	contractile fiber	1	25	444	23120	2.08	0.384	Q62902	GO_CC
Cluster6	contractile fiber part	1	25	404	23120	2.29	0.357	Q62902	GO_CC
Cluster6	cytoplasm	24	25	16001	23120	1.39	0.00122	A0JPQ8 B5DFC3 D3ZFC6 D3ZTX0 D3ZZC1 D4A6G6 G3V6S3 P02761 P13471 P15149 P19945 P24470 P29314 P62083 P62278 P62282 P62832 P62909 Q5XI86 Q62902 Q62930 Q63584 Q63688 Q9R0T3	GO_CC
Cluster6	cytoplasmic part	24	25	13935	23120	1.59	5.53e-05	A0JPQ8 B5DFC3 D3ZFC6 D3ZTX0 D3ZZC1 D4A6G6 G3V6S3 P02761 P13471 P15149 P19945 P24470 P29314 P62083 P62278 P62282 P62832 P62909 Q5XI86 Q62902 Q62930 Q63584 Q63688 Q9R0T3	GO_CC
Cluster6	cytoplasmic ribonucleoprotein granule	1	25	303	23120	3.05	0.281	P19945	GO_CC
Cluster6	cytoplasmic side of endoplasmic reticulum membrane	1	25	64	23120	14.45	0.067	P62832	GO_CC
Cluster6	cytoplasmic side of membrane	1	25	368	23120	2.51	0.331	P62832	GO_CC
Cluster6	cytoplasmic vesicle	7	25	3343	23120	1.94	0.0589	B5DFC3 D3ZFC6 D3ZTX0 D3ZZC1 Q62902 Q63584 Q9R0T3	GO_CC
Cluster6	cytoplasmic vesicle lumen	3	25	513	23120	5.41	0.0174	D3ZFC6 D3ZZC1 Q9R0T3	GO_CC
Cluster6	cytoplasmic vesicle membrane	4	25	980	23120	3.77	0.0199	B5DFC3 D3ZTX0 Q62902 Q63584	GO_CC
Cluster6	cytoplasmic vesicle part	7	25	1929	23120	3.36	0.00349	B5DFC3 D3ZFC6 D3ZTX0 D3ZZC1 Q62902 Q63584 Q9R0T3	GO_CC
Cluster6	cytoskeletal part	1	25	2092	23120	0.44	0.907	P62909	GO_CC
Cluster6	cytoskeleton	1	25	2763	23120	0.33	0.959	P62909	GO_CC
Cluster6	cytosol	14	25	7526	23120	1.72	0.0131	B5DFC3 D4A6G6 P02761 P13471 P19945 P29314 P62083 P62278 P62282 P62832 P62909 Q5XI86 Q62930 Q9R0T3	GO_CC
Cluster6	cytosolic large ribosomal subunit	2	25	187	23120	9.89	0.0173	P19945 P62832	GO_CC
Cluster6	cytosolic part	9	25	490	23120	16.99	1.21e-09	D4A6G6 P13471 P19945 P29314 P62083 P62278 P62282 P62832 P62909	GO_CC
Cluster6	cytosolic ribosome	9	25	310	23120	26.85	2.11e-11	D4A6G6 P13471 P19945 P29314 P62083 P62278 P62282 P62832 P62909	GO_CC
Cluster6	cytosolic small ribosomal subunit	7	25	116	23120	55.81	2.97e-11	D4A6G6 P13471 P29314 P62083 P62278 P62282 P62909	GO_CC
Cluster6	dendrite	2	25	1216	23120	1.52	0.381	P19945 P62909	GO_CC
Cluster6	dendritic tree	2	25	1218	23120	1.52	0.382	P19945 P62909	GO_CC
Cluster6	endomembrane system	15	25	6551	23120	2.12	0.000926	A0JPQ8 B5DFC3 D3ZFC6 D3ZTX0 D3ZZC1 G3V6S3 P15149 P19945 P24470 P62832 P62909 Q62902 Q63584 Q63688 Q9R0T3	GO_CC
Cluster6	endoplasmic reticulum	14	25	2777	23120	4.66	1.54e-07	A0JPQ8 B5DFC3 D3ZTX0 D3ZZC1 G3V6S3 P15149 P19945 P24470 P62832 P62909 Q62902 Q63584 Q63688 Q9R0T3	GO_CC
Cluster6	endoplasmic reticulum exit site	1	25	60	23120	15.41	0.0629	B5DFC3	GO_CC
Cluster6	endoplasmic reticulum lumen	3	25	524	23120	5.29	0.0184	D3ZZC1 G3V6S3 Q9R0T3	GO_CC
Cluster6	endoplasmic reticulum membrane	9	25	1402	23120	5.94	9.09e-06	A0JPQ8 B5DFC3 D3ZTX0 P15149 P24470 P62832 Q62902 Q63584 Q63688	GO_CC
Cluster6	endoplasmic reticulum part	12	25	1887	23120	5.88	1.6e-07	A0JPQ8 B5DFC3 D3ZTX0 D3ZZC1 G3V6S3 P15149 P24470 P62832 Q62902 Q63584 Q63688 Q9R0T3	GO_CC
Cluster6	endoplasmic reticulum subcompartment	9	25	1420	23120	5.86	1.01e-05	A0JPQ8 B5DFC3 D3ZTX0 P15149 P24470 P62832 Q62902 Q63584 Q63688	GO_CC
Cluster6	envelope	1	25	1668	23120	0.55	0.846	P62909	GO_CC
Cluster6	extracellular region	6	25	3362	23120	1.65	0.145	D3ZFC6 D3ZZC1 G3V6S3 P02761 Q62930 Q9R0T3	GO_CC
Cluster6	extracellular region part	2	25	2407	23120	0.77	0.75	P02761 Q62930	GO_CC
Cluster6	extracellular space	2	25	2024	23120	0.91	0.656	P02761 Q62930	GO_CC
Cluster6	extrinsic component of membrane	1	25	453	23120	2.04	0.39	B5DFC3	GO_CC
Cluster6	gamma-secretase complex	1	25	8	23120	115.6	0.00862	Q63584	GO_CC
Cluster6	host	1	25	28	23120	33.03	0.0299	Q62902	GO_CC
Cluster6	host cell	1	25	28	23120	33.03	0.0299	Q62902	GO_CC
Cluster6	host cell cytoplasm	1	25	19	23120	48.67	0.0204	Q62902	GO_CC
Cluster6	host cell cytoplasm part	1	25	19	23120	48.67	0.0204	Q62902	GO_CC
Cluster6	host cell part	1	25	28	23120	33.03	0.0299	Q62902	GO_CC
Cluster6	host cell perinuclear region of cytoplasm	1	25	3	23120	308.27	0.00324	Q62902	GO_CC
Cluster6	host intracellular part	1	25	24	23120	38.53	0.0256	Q62902	GO_CC
Cluster6	integral component of membrane	3	25	4152	23120	0.67	0.852	Q62902 Q62930 Q63584	GO_CC
Cluster6	integral component of plasma membrane	1	25	2463	23120	0.38	0.94	Q62930	GO_CC
Cluster6	intracellular	25	25	19286	23120	1.2	0.0107	A0JPQ8 B5DFC3 D3ZFC6 D3ZTX0 D3ZZC1 D4A6G6 G3V6S3 P02761 P13471 P15149 P19945 P24470 P29314 P62083 P62278 P62282 P62832 P62909 Q5XI86 Q62902 Q62930 Q63584 Q63688 Q68G19 Q9R0T3	GO_CC
Cluster6	intracellular membrane-bounded organelle	22	25	14035	23120	1.45	0.00291	A0JPQ8 B5DFC3 D3ZTX0 D3ZZC1 D4A6G6 G3V6S3 P02761 P13471 P15149 P19945 P24470 P29314 P62083 P62278 P62282 P62832 P62909 Q62902 Q63584 Q63688 Q68G19 Q9R0T3	GO_CC
Cluster6	intracellular non-membrane-bounded organelle	10	25	5595	23120	1.65	0.0587	D4A6G6 P13471 P19945 P29314 P62083 P62278 P62282 P62832 P62909 Q62902	GO_CC
Cluster6	intracellular organelle	23	25	16534	23120	1.29	0.0134	A0JPQ8 B5DFC3 D3ZFC6 D3ZTX0 D3ZZC1 D4A6G6 G3V6S3 P02761 P13471 P15149 P19945 P24470 P29314 P62083 P62278 P62282 P62832 P62909 Q62902 Q63584 Q63688 Q68G19 Q9R0T3	GO_CC
Cluster6	intracellular organelle lumen	12	25	7436	23120	1.49	0.0721	D3ZFC6 D3ZZC1 D4A6G6 G3V6S3 P13471 P29314 P62083 P62278 P62282 P62832 P62909 Q9R0T3	GO_CC
Cluster6	intracellular organelle part	21	25	12485	23120	1.56	0.00169	A0JPQ8 B5DFC3 D3ZFC6 D3ZTX0 D3ZZC1 D4A6G6 G3V6S3 P13471 P15149 P19945 P24470 P29314 P62083 P62278 P62282 P62832 P62909 Q62902 Q63584 Q63688 Q9R0T3	GO_CC
Cluster6	intracellular part	25	25	19175	23120	1.21	0.00928	A0JPQ8 B5DFC3 D3ZFC6 D3ZTX0 D3ZZC1 D4A6G6 G3V6S3 P02761 P13471 P15149 P19945 P24470 P29314 P62083 P62278 P62282 P62832 P62909 Q5XI86 Q62902 Q62930 Q63584 Q63688 Q68G19 Q9R0T3	GO_CC
Cluster6	intracellular region of host	1	25	24	23120	38.53	0.0256	Q62902	GO_CC
Cluster6	intracellular vesicle	7	25	3355	23120	1.93	0.0598	B5DFC3 D3ZFC6 D3ZTX0 D3ZZC1 Q62902 Q63584 Q9R0T3	GO_CC
Cluster6	intrinsic component of membrane	3	25	4327	23120	0.64	0.873	Q62902 Q62930 Q63584	GO_CC
Cluster6	intrinsic component of plasma membrane	1	25	2585	23120	0.36	0.948	Q62930	GO_CC
Cluster6	large ribosomal subunit	2	25	256	23120	7.23	0.031	P19945 P62832	GO_CC
Cluster6	leading edge membrane	1	25	257	23120	3.6	0.244	P62909	GO_CC
Cluster6	lysosomal lumen	1	25	144	23120	6.42	0.145	D3ZZC1	GO_CC
Cluster6	lysosome	2	25	861	23120	2.15	0.238	D3ZZC1 Q9R0T3	GO_CC
Cluster6	lytic vacuole	2	25	861	23120	2.15	0.238	D3ZZC1 Q9R0T3	GO_CC
Cluster6	macromolecular complex	13	25	7260	23120	1.66	0.0256	B5DFC3 D3ZTX0 D4A6G6 P13471 P19945 P29314 P62083 P62278 P62282 P62832 P62909 Q62930 Q63584	GO_CC
Cluster6	membrane	13	25	11118	23120	1.08	0.423	A0JPQ8 B5DFC3 D3ZFC6 D3ZTX0 P15149 P19945 P24470 P62832 P62909 Q62902 Q62930 Q63584 Q63688	GO_CC
Cluster6	membrane attack complex	1	25	10	23120	92.48	0.0108	Q62930	GO_CC
Cluster6	membrane coat	2	25	111	23120	16.66	0.00638	B5DFC3 D3ZTX0	GO_CC
Cluster6	membrane part	11	25	7202	23120	1.41	0.122	A0JPQ8 B5DFC3 D3ZTX0 P15149 P24470 P62832 P62909 Q62902 Q62930 Q63584 Q63688	GO_CC
Cluster6	membrane protein complex	4	25	1489	23120	2.48	0.0736	B5DFC3 D3ZTX0 Q62930 Q63584	GO_CC
Cluster6	membrane-bounded organelle	23	25	15308	23120	1.39	0.00305	A0JPQ8 B5DFC3 D3ZFC6 D3ZTX0 D3ZZC1 D4A6G6 G3V6S3 P02761 P13471 P15149 P19945 P24470 P29314 P62083 P62278 P62282 P62832 P62909 Q62902 Q63584 Q63688 Q68G19 Q9R0T3	GO_CC
Cluster6	membrane-enclosed lumen	12	25	7443	23120	1.49	0.0726	D3ZFC6 D3ZZC1 D4A6G6 G3V6S3 P13471 P29314 P62083 P62278 P62282 P62832 P62909 Q9R0T3	GO_CC
Cluster6	microtubule cytoskeleton	1	25	1640	23120	0.56	0.841	P62909	GO_CC
Cluster6	mitochondrial envelope	1	25	978	23120	0.95	0.661	P62909	GO_CC
Cluster6	mitochondrial inner membrane	1	25	610	23120	1.52	0.488	P62909	GO_CC
Cluster6	mitochondrial matrix	1	25	624	23120	1.48	0.496	P62909	GO_CC
Cluster6	mitochondrial membrane	1	25	886	23120	1.04	0.624	P62909	GO_CC
Cluster6	mitochondrial part	1	25	1374	23120	0.67	0.784	P62909	GO_CC
Cluster6	mitochondrion	1	25	2156	23120	0.43	0.914	P62909	GO_CC
Cluster6	mitotic spindle	1	25	129	23120	7.17	0.131	P62909	GO_CC
Cluster6	myofibril	1	25	427	23120	2.17	0.373	Q62902	GO_CC
Cluster6	neuron part	2	25	2922	23120	0.63	0.843	P19945 P62909	GO_CC
Cluster6	neuron projection	2	25	2424	23120	0.76	0.754	P19945 P62909	GO_CC
Cluster6	non-membrane-bounded organelle	10	25	5595	23120	1.65	0.0587	D4A6G6 P13471 P19945 P29314 P62083 P62278 P62282 P62832 P62909 Q62902	GO_CC
Cluster6	nuclear lumen	8	25	5718	23120	1.29	0.263	D4A6G6 P13471 P29314 P62083 P62278 P62282 P62832 P62909	GO_CC
Cluster6	nuclear part	8	25	6261	23120	1.18	0.36	D4A6G6 P13471 P29314 P62083 P62278 P62282 P62832 P62909	GO_CC
Cluster6	nucleolus	7	25	1307	23120	4.95	0.000354	D4A6G6 P13471 P29314 P62083 P62278 P62832 P62909	GO_CC
Cluster6	nucleoplasm	6	25	4830	23120	1.15	0.427	P13471 P29314 P62083 P62278 P62282 P62832	GO_CC
Cluster6	nucleus	10	25	9002	23120	1.03	0.532	D4A6G6 P02761 P13471 P19945 P29314 P62083 P62278 P62282 P62832 P62909	GO_CC
Cluster6	organelle	23	25	16911	23120	1.26	0.0203	A0JPQ8 B5DFC3 D3ZFC6 D3ZTX0 D3ZZC1 D4A6G6 G3V6S3 P02761 P13471 P15149 P19945 P24470 P29314 P62083 P62278 P62282 P62832 P62909 Q62902 Q63584 Q63688 Q68G19 Q9R0T3	GO_CC
Cluster6	organelle envelope	1	25	1667	23120	0.55	0.846	P62909	GO_CC
Cluster6	organelle inner membrane	1	25	686	23120	1.35	0.529	P62909	GO_CC
Cluster6	organelle lumen	12	25	7443	23120	1.49	0.0726	D3ZFC6 D3ZZC1 D4A6G6 G3V6S3 P13471 P29314 P62083 P62278 P62282 P62832 P62909 Q9R0T3	GO_CC
Cluster6	organelle membrane	9	25	3708	23120	2.24	0.0123	B5DFC3 D3ZTX0 P15149 P24470 P62832 P62909 Q62902 Q63584 Q63688	GO_CC
Cluster6	organelle part	21	25	12887	23120	1.51	0.00287	A0JPQ8 B5DFC3 D3ZFC6 D3ZTX0 D3ZZC1 D4A6G6 G3V6S3 P13471 P15149 P19945 P24470 P29314 P62083 P62278 P62282 P62832 P62909 Q62902 Q63584 Q63688 Q9R0T3	GO_CC
Cluster6	organelle subcompartment	9	25	2202	23120	3.78	0.000315	A0JPQ8 B5DFC3 D3ZTX0 P15149 P24470 P62832 Q62902 Q63584 Q63688	GO_CC
Cluster6	other organism	1	25	45	23120	20.55	0.0476	Q62902	GO_CC
Cluster6	other organism cell	1	25	45	23120	20.55	0.0476	Q62902	GO_CC
Cluster6	other organism part	1	25	45	23120	20.55	0.0476	Q62902	GO_CC
Cluster6	perinuclear region of cytoplasm	1	25	1125	23120	0.82	0.713	B5DFC3	GO_CC
Cluster6	plasma membrane	4	25	7649	23120	0.48	0.984	D3ZFC6 P62909 Q62930 Q63584	GO_CC
Cluster6	plasma membrane part	3	25	4286	23120	0.65	0.868	P62909 Q62930 Q63584	GO_CC
Cluster6	plasma membrane protein complex	2	25	803	23120	2.3	0.215	Q62930 Q63584	GO_CC
Cluster6	plasma membrane region	1	25	1775	23120	0.52	0.864	P62909	GO_CC
Cluster6	platelet dense granule	1	25	34	23120	27.2	0.0361	D3ZFC6	GO_CC
Cluster6	platelet dense granule lumen	1	25	20	23120	46.24	0.0214	D3ZFC6	GO_CC
Cluster6	polysome	1	25	112	23120	8.26	0.114	P62909	GO_CC
Cluster6	pore complex	1	25	23	23120	40.21	0.0246	Q62930	GO_CC
Cluster6	preribosome	1	25	113	23120	8.18	0.115	P62083	GO_CC
Cluster6	primary lysosome	2	25	232	23120	7.97	0.0258	D3ZZC1 Q9R0T3	GO_CC
Cluster6	ribonucleoprotein complex	9	25	1303	23120	6.39	5.01e-06	D4A6G6 P13471 P19945 P29314 P62083 P62278 P62282 P62832 P62909	GO_CC
Cluster6	ribonucleoprotein granule	1	25	323	23120	2.86	0.297	P19945	GO_CC
Cluster6	ribosomal subunit	9	25	408	23120	20.4	2.42e-10	D4A6G6 P13471 P19945 P29314 P62083 P62278 P62282 P62832 P62909	GO_CC
Cluster6	ribosome	9	25	454	23120	18.33	6.2e-10	D4A6G6 P13471 P19945 P29314 P62083 P62278 P62282 P62832 P62909	GO_CC
Cluster6	rough endoplasmic reticulum	1	25	216	23120	4.28	0.209	P62832	GO_CC
Cluster6	rough endoplasmic reticulum membrane	1	25	72	23120	12.84	0.0751	P62832	GO_CC
Cluster6	ruffle	1	25	286	23120	3.23	0.268	P62909	GO_CC
Cluster6	ruffle membrane	1	25	133	23120	6.95	0.134	P62909	GO_CC
Cluster6	sarcomere	1	25	373	23120	2.48	0.334	Q62902	GO_CC
Cluster6	secretory granule	4	25	1407	23120	2.63	0.0622	D3ZFC6 D3ZZC1 Q63584 Q9R0T3	GO_CC
Cluster6	secretory granule lumen	3	25	487	23120	5.7	0.0151	D3ZFC6 D3ZZC1 Q9R0T3	GO_CC
Cluster6	secretory granule membrane	1	25	459	23120	2.01	0.394	Q63584	GO_CC
Cluster6	secretory vesicle	4	25	1691	23120	2.19	0.106	D3ZFC6 D3ZZC1 Q63584 Q9R0T3	GO_CC
Cluster6	side of membrane	1	25	970	23120	0.95	0.658	P62832	GO_CC
Cluster6	small ribosomal subunit	7	25	162	23120	39.96	3.15e-10	D4A6G6 P13471 P29314 P62083 P62278 P62282 P62909	GO_CC
Cluster6	small-subunit processome	1	25	43	23120	21.51	0.0455	P62083	GO_CC
Cluster6	smooth endoplasmic reticulum	1	25	61	23120	15.16	0.0639	Q9R0T3	GO_CC
Cluster6	somatodendritic compartment	2	25	1779	23120	1.04	0.583	P19945 P62909	GO_CC
Cluster6	spindle	1	25	403	23120	2.29	0.356	P62909	GO_CC
Cluster6	supramolecular complex	1	25	1056	23120	0.88	0.689	Q62902	GO_CC
Cluster6	supramolecular fiber	1	25	1042	23120	0.89	0.684	Q62902	GO_CC
Cluster6	supramolecular polymer	1	25	1052	23120	0.88	0.688	Q62902	GO_CC
Cluster6	trans-Golgi network transport vesicle	1	25	42	23120	22.02	0.0445	Q63584	GO_CC
Cluster6	transport vesicle	4	25	598	23120	6.19	0.00364	B5DFC3 D3ZTX0 Q62902 Q63584	GO_CC
Cluster6	transport vesicle membrane	4	25	238	23120	15.54	0.000117	B5DFC3 D3ZTX0 Q62902 Q63584	GO_CC
Cluster6	vacuolar lumen	2	25	273	23120	6.78	0.0349	D3ZZC1 Q9R0T3	GO_CC
Cluster6	vacuolar part	2	25	629	23120	2.94	0.147	D3ZZC1 Q9R0T3	GO_CC
Cluster6	vacuole	2	25	1004	23120	1.84	0.296	D3ZZC1 Q9R0T3	GO_CC
Cluster6	vesicle	7	25	3547	23120	1.83	0.0767	B5DFC3 D3ZFC6 D3ZTX0 D3ZZC1 Q62902 Q63584 Q9R0T3	GO_CC
Cluster6	vesicle coat	2	25	68	23120	27.2	0.00245	B5DFC3 D3ZTX0	GO_CC
Cluster6	vesicle lumen	3	25	521	23120	5.33	0.0181	D3ZFC6 D3ZZC1 Q9R0T3	GO_CC
Cluster6	vesicle membrane	4	25	1018	23120	3.63	0.0226	B5DFC3 D3ZTX0 Q62902 Q63584	GO_CC
Cluster6	whole membrane	4	25	2235	23120	1.66	0.218	B5DFC3 D3ZTX0 Q62902 Q63584	GO_CC
Cluster6	zymogen granule	1	25	52	23120	17.78	0.0548	Q63584	GO_CC
Cluster6	zymogen granule membrane	1	25	29	23120	31.89	0.0309	Q63584	GO_CC

## Sheet: GO.mf enrich
Supporting information Table 3c. Molecular function enrichment analysis based on dynamic clustering by different categories.
Cluster	Terms	Mapping	All.mapping	Background	All.background	Fold.enrich	p.value	Protein.IDs	Type
Cluster1	anion binding	1	2	2306	19964	4.33	0.218	P51869	GO_MF
Cluster1	arachidonic acid binding	1	2	19	19964	525.37	0.0019	P51869	GO_MF
Cluster1	arachidonic acid monooxygenase activity	1	2	77	19964	129.64	0.0077	P51869	GO_MF
Cluster1	binding	2	2	14341	19964	1.39	0.516	P51869 Q9Z1E1	GO_MF
Cluster1	carboxylic acid binding	1	2	340	19964	29.36	0.0338	P51869	GO_MF
Cluster1	catalytic activity	1	2	7542	19964	1.32	0.613	P51869	GO_MF
Cluster1	cofactor binding	1	2	553	19964	18.05	0.0546	P51869	GO_MF
Cluster1	enzyme binding	1	2	3826	19964	2.61	0.347	Q9Z1E1	GO_MF
Cluster1	fatty acid binding	1	2	91	19964	109.69	0.0091	P51869	GO_MF
Cluster1	fatty acid derivative binding	1	2	54	19964	184.85	0.0054	P51869	GO_MF
Cluster1	glutamate receptor binding	1	2	140	19964	71.3	0.014	Q9Z1E1	GO_MF
Cluster1	heme binding	1	2	142	19964	70.3	0.0142	P51869	GO_MF
Cluster1	heterocyclic compound binding	1	2	4573	19964	2.18	0.406	P51869	GO_MF
Cluster1	icosanoid binding	1	2	24	19964	415.92	0.0024	P51869	GO_MF
Cluster1	icosatetraenoic acid binding	1	2	20	19964	499.1	0.002	P51869	GO_MF
Cluster1	ion binding	1	2	3447	19964	2.9	0.316	P51869	GO_MF
Cluster1	ionotropic glutamate receptor binding	1	2	89	19964	112.16	0.0089	Q9Z1E1	GO_MF
Cluster1	lipid binding	1	2	993	19964	10.05	0.097	P51869	GO_MF
Cluster1	long-chain fatty acid binding	1	2	43	19964	232.14	0.0043	P51869	GO_MF
Cluster1	monocarboxylic acid binding	1	2	140	19964	71.3	0.014	P51869	GO_MF
Cluster1	monooxygenase activity	1	2	189	19964	52.81	0.0188	P51869	GO_MF
Cluster1	organic acid binding	1	2	349	19964	28.6	0.0347	P51869	GO_MF
Cluster1	organic cyclic compound binding	1	2	4701	19964	2.12	0.416	P51869	GO_MF
Cluster1	oxidoreductase activity	1	2	1099	19964	9.08	0.107	P51869	GO_MF
Cluster1	protease binding	1	2	270	19964	36.97	0.0269	Q9Z1E1	GO_MF
Cluster1	protein binding	1	2	10452	19964	0.96	0.773	Q9Z1E1	GO_MF
Cluster1	protein dimerization activity	1	2	2135	19964	4.68	0.202	Q9Z1E1	GO_MF
Cluster1	protein heterodimerization activity	1	2	914	19964	10.92	0.0895	Q9Z1E1	GO_MF
Cluster1	receptor binding	1	2	2633	19964	3.79	0.246	Q9Z1E1	GO_MF
Cluster1	small molecule binding	1	2	1840	19964	5.42	0.176	P51869	GO_MF
Cluster1	tetrapyrrole binding	1	2	151	19964	66.11	0.0151	P51869	GO_MF
Cluster2	2,4-dienoyl-CoA reductase (NADPH) activity	1	56	3	19964	118.83	0.00839	Q9Z2M4	GO_MF
Cluster2	2-aminoadipate transaminase activity	1	56	2	19964	178.25	0.0056	Q64602	GO_MF
Cluster2	3 iron, 4 sulfur cluster binding	1	56	4	19964	89.12	0.0112	Q9ER34	GO_MF
Cluster2	3-hydroxyacyl-CoA dehydratase activity	1	56	6	19964	59.42	0.0167	P97852	GO_MF
Cluster2	3-hydroxyacyl-CoA dehydrogenase activity	3	56	14	19964	76.39	7.44e-06	P07896 P97852 Q9WVK7	GO_MF
Cluster2	3-hydroxyisobutyrate dehydrogenase activity	1	56	1	19964	356.5	0.00281	P29266	GO_MF
Cluster2	3-keto sterol reductase activity	1	56	5	19964	71.3	0.0139	Q8VID1	GO_MF
Cluster2	3-mercaptopyruvate sulfurtransferase activity	1	56	1	19964	356.5	0.00281	P97532	GO_MF
Cluster2	4 iron, 4 sulfur cluster binding	1	56	16	19964	22.28	0.044	Q9ER34	GO_MF
Cluster2	4-hydroxy-2-oxoglutarate aldolase activity	1	56	1	19964	356.5	0.00281	D4A2K1	GO_MF
Cluster2	ATP binding	2	56	600	19964	1.19	0.505	D3ZHR2 P07756	GO_MF
Cluster2	ATPase activator activity	1	56	32	19964	11.14	0.086	P97576	GO_MF
Cluster2	ATPase activity	1	56	598	19964	0.6	0.818	D3ZHR2	GO_MF
Cluster2	ATPase activity, coupled	1	56	482	19964	0.74	0.746	D3ZHR2	GO_MF
Cluster2	ATPase activity, coupled to movement of substances	1	56	209	19964	1.71	0.446	D3ZHR2	GO_MF
Cluster2	ATPase binding	1	56	184	19964	1.94	0.405	P97576	GO_MF
Cluster2	ATPase regulator activity	1	56	52	19964	6.86	0.136	P97576	GO_MF
Cluster2	C-acyltransferase activity	1	56	33	19964	10.8	0.0886	P11915	GO_MF
Cluster2	CoA hydrolase activity	2	56	40	19964	17.82	0.00563	D3ZIQ1 O55171	GO_MF
Cluster2	CoA-ligase activity	1	56	35	19964	10.19	0.0937	P18163	GO_MF
Cluster2	DNA binding	1	56	2204	19964	0.16	0.999	P07895	GO_MF
Cluster2	GTPase binding	2	56	921	19964	0.77	0.737	Q2M2R8 Q4FZT0	GO_MF
Cluster2	L-aminoadipate-semialdehyde dehydrogenase activity	1	56	1	19964	356.5	0.00281	Q64057	GO_MF
Cluster2	L-malate dehydrogenase activity	1	56	4	19964	89.12	0.0112	P04636	GO_MF
Cluster2	NAD binding	1	56	61	19964	5.84	0.158	F1LN88	GO_MF
Cluster2	NADH binding	1	56	7	19964	50.93	0.0195	F1LN88	GO_MF
Cluster2	NADH dehydrogenase (quinone) activity	2	56	56	19964	12.73	0.0108	D3ZLT1 Q5XIH3	GO_MF
Cluster2	NADH dehydrogenase (ubiquinone) activity	2	56	56	19964	12.73	0.0108	D3ZLT1 Q5XIH3	GO_MF
Cluster2	NADH dehydrogenase activity	2	56	58	19964	12.29	0.0116	D3ZLT1 Q5XIH3	GO_MF
Cluster2	NADP-retinol dehydrogenase activity	1	56	15	19964	23.77	0.0413	Q8VID1	GO_MF
Cluster2	RNA binding	2	56	1237	19964	0.58	0.87	P63039 P85834	GO_MF
Cluster2	S-acetyltransferase activity	1	56	1	19964	356.5	0.00281	P08461	GO_MF
Cluster2	S-acyltransferase activity	1	56	10	19964	35.65	0.0277	P08461	GO_MF
Cluster2	acetate-CoA ligase activity	1	56	5	19964	71.3	0.0139	P18163	GO_MF
Cluster2	acetyl-CoA C-acyltransferase activity	1	56	18	19964	19.81	0.0493	P11915	GO_MF
Cluster2	acetylpyruvate hydrolase activity	1	56	1	19964	356.5	0.00281	Q6AYQ8	GO_MF
Cluster2	acetyltransferase activity	1	56	113	19964	3.15	0.273	P08461	GO_MF
Cluster2	acid-thiol ligase activity	1	56	40	19964	8.91	0.106	P18163	GO_MF
Cluster2	aconitate hydratase activity	1	56	3	19964	118.83	0.00839	Q9ER34	GO_MF
Cluster2	active transmembrane transporter activity	1	56	557	19964	0.64	0.795	D3ZHR2	GO_MF
Cluster2	acyl-CoA dehydrogenase activity	3	56	27	19964	39.61	5.83e-05	B3DMA2 G3V796 P15650	GO_MF
Cluster2	acyl-CoA hydrolase activity	2	56	35	19964	20.37	0.00433	D3ZIQ1 O55171	GO_MF
Cluster2	acyl-CoA oxidase activity	1	56	13	19964	27.42	0.0359	P15650	GO_MF
Cluster2	adenyl nucleotide binding	8	56	730	19964	3.91	0.000925	D3ZHR2 G3V796 G3V7J0 P07756 P11915 P15650 P97519 P97576	GO_MF
Cluster2	adenyl ribonucleotide binding	7	56	716	19964	3.49	0.00373	D3ZHR2 G3V796 G3V7J0 P07756 P11915 P15650 P97519	GO_MF
Cluster2	adenyl-nucleotide exchange factor activity	1	56	11	19964	32.41	0.0304	P97576	GO_MF
Cluster2	adenylate kinase activity	1	56	16	19964	22.28	0.044	Q6P2A5	GO_MF
Cluster2	alanine-glyoxylate transaminase activity	1	56	6	19964	59.42	0.0167	Q64565	GO_MF
Cluster2	alcohol binding	1	56	125	19964	2.85	0.297	P11915	GO_MF
Cluster2	alcohol dehydrogenase (NADP+) activity	1	56	31	19964	11.5	0.0835	Q8VID1	GO_MF
Cluster2	alcohol dehydrogenase [NAD(P)+] activity	1	56	1	19964	356.5	0.00281	Q8VID1	GO_MF
Cluster2	aldehyde dehydrogenase (NAD) activity	2	56	32	19964	22.28	0.00363	F1LN88 Q64057	GO_MF
Cluster2	aldehyde dehydrogenase [NAD(P)+] activity	1	56	13	19964	27.42	0.0359	F1LN88	GO_MF
Cluster2	aldehyde-lyase activity	1	56	12	19964	29.71	0.0332	D4A2K1	GO_MF
Cluster2	aldo-keto reductase (NADP) activity	1	56	43	19964	8.29	0.114	Q8VID1	GO_MF
Cluster2	amide binding	8	56	689	19964	4.14	0.000635	F1M7X5 G3V796 G3V7J0 P11915 P15650 P63039 P97519 Q2M2R8	GO_MF
Cluster2	amino acid binding	1	56	113	19964	3.15	0.273	P07756	GO_MF
Cluster2	aminomethyltransferase activity	1	56	4	19964	89.12	0.0112	Q5I0P2	GO_MF
Cluster2	aminopeptidase activity	1	56	75	19964	4.75	0.19	F1M7X5	GO_MF
Cluster2	anion binding	12	56	2306	19964	1.86	0.0242	B3DMA2 D3ZHR2 F1LN88 G3V796 G3V7J0 P07756 P11915 P13803 P15650 P97519 Q4FZT0 Q64565	GO_MF
Cluster2	antioxidant activity	2	56	114	19964	6.25	0.0408	G3V7I0 P07895	GO_MF
Cluster2	apolipoprotein A-I binding	1	56	8	19964	44.56	0.0222	P63039	GO_MF
Cluster2	apolipoprotein binding	1	56	32	19964	11.14	0.086	P63039	GO_MF
Cluster2	beta-alanine-pyruvate transaminase activity	1	56	1	19964	356.5	0.00281	Q64565	GO_MF
Cluster2	beta-tubulin binding	1	56	61	19964	5.84	0.158	Q642G4	GO_MF
Cluster2	betaine-aldehyde dehydrogenase activity	1	56	1	19964	356.5	0.00281	Q64057	GO_MF
Cluster2	binding	42	56	14341	19964	1.04	0.36	B0BNJ4 B3DMA2 D3Z900 D3ZHR2 D3ZIQ1 D4A2K1 F1LN88 F1M7X5 G3V6I4 G3V796 G3V7I0 G3V7J0 O55171 P04636 P07756 P07895 P07896 P08461 P11915 P13803 P15650 P26772 P27615 P63039 P85834 P97519 P97532 P97576 P97852 Q2M2R8 Q4FZT0 Q5I0P2 Q5XIC0 Q642G4 Q64565 Q64602 Q6P2A5 Q8VID1 Q9ER34 Q9WVK3 Q9Z2M4 Q9Z311	GO_MF
Cluster2	calcium ion binding	1	56	564	19964	0.63	0.8	P07756	GO_MF
Cluster2	carbamoyl-phosphate synthase (ammonia) activity	1	56	2	19964	178.25	0.0056	P07756	GO_MF
Cluster2	carbohydrate derivative binding	8	56	1506	19964	1.89	0.0578	D3ZHR2 G3V796 G3V7J0 P07756 P11915 P15650 P63039 P97519	GO_MF
Cluster2	carbon-carbon lyase activity	3	56	59	19964	18.13	0.000608	D4A2K1 P97519 Q6AYQ8	GO_MF
Cluster2	carbon-oxygen lyase activity	4	56	76	19964	18.76	6.13e-05	P07896 P14604 P97852 Q9ER34	GO_MF
Cluster2	carbonyl reductase (NADPH) activity	1	56	8	19964	44.56	0.0222	Q8VID1	GO_MF
Cluster2	carboxy-lyase activity	1	56	40	19964	8.91	0.106	Q6AYQ8	GO_MF
Cluster2	carboxylic acid binding	3	56	340	19964	3.15	0.0701	P07756 P11915 P97519	GO_MF
Cluster2	cardiolipin binding	1	56	14	19964	25.46	0.0386	Q4FZT0	GO_MF
Cluster2	cargo receptor activity	1	56	100	19964	3.56	0.245	P27615	GO_MF
Cluster2	catalytic activity	46	56	7542	19964	2.17	1.19e-11	A2VCW9 B0BNJ4 B3DMA2 D3Z900 D3ZHR2 D3ZIQ1 D3ZLT1 D4A2K1 F1LN88 F1M7X5 G3V6I4 G3V796 G3V7I0 G3V7J0 O55171 P04636 P07756 P07895 P07896 P08461 P10888 P11915 P12075 P13803 P14604 P15650 P18163 P28492 P29266 P97519 P97532 P97852 Q5I0P2 Q5XIC0 Q5XIH3 Q64057 Q64565 Q64602 Q6AYQ8 Q6P2A5 Q8VID1 Q9ER34 Q9WVK3 Q9WVK7 Q9Z2M4 Q9Z311	GO_MF
Cluster2	cation binding	8	56	1708	19964	1.67	0.103	B0BNJ4 D3Z900 G3V6I4 P07756 P07895 P26772 P97519 Q9ER34	GO_MF
Cluster2	cation transmembrane transporter activity	2	56	1047	19964	0.68	0.8	P10888 P12075	GO_MF
Cluster2	chaperone binding	3	56	166	19964	6.44	0.0113	P04636 P26772 P63039	GO_MF
Cluster2	cholesterol binding	1	56	66	19964	5.4	0.169	P11915	GO_MF
Cluster2	cholesterol transporter activity	1	56	22	19964	16.2	0.06	P11915	GO_MF
Cluster2	coenzyme binding	11	56	330	19964	11.88	1.64e-09	B3DMA2 D3Z900 F1LN88 G3V6I4 G3V796 G3V7J0 P11915 P13803 P15650 P97519 Q64565	GO_MF
Cluster2	cofactor binding	12	56	553	19964	7.74	3.33e-08	B3DMA2 D3Z900 F1LN88 G3V6I4 G3V796 G3V7J0 P11915 P13803 P15650 P97519 Q64565 Q9ER34	GO_MF
Cluster2	collagen binding	1	56	125	19964	2.85	0.297	F1M7X5	GO_MF
Cluster2	cysteine-type endopeptidase inhibitor activity	1	56	115	19964	3.1	0.277	G3V7I0	GO_MF
Cluster2	cytochrome-c oxidase activity	2	56	22	19964	32.41	0.00172	P10888 P12075	GO_MF
Cluster2	cytoskeletal protein binding	1	56	1382	19964	0.26	0.982	Q642G4	GO_MF
Cluster2	dihydrolipoamide S-acyltransferase activity	1	56	1	19964	356.5	0.00281	P08461	GO_MF
Cluster2	dioxygenase activity	1	56	106	19964	3.36	0.258	B0BNJ4	GO_MF
Cluster2	dipeptidyl-peptidase activity	1	56	13	19964	27.42	0.0359	F1M7X5	GO_MF
Cluster2	dodecenoyl-CoA delta-isomerase activity	1	56	6	19964	59.42	0.0167	Q5XIC0	GO_MF
Cluster2	double-stranded RNA binding	1	56	134	19964	2.66	0.315	P63039	GO_MF
Cluster2	drug binding	4	56	1043	19964	1.37	0.336	D3ZHR2 P07756 P07895 Q64565	GO_MF
Cluster2	electron carrier activity	4	56	125	19964	11.41	0.000418	F1LN88 P10888 P12075 P13803	GO_MF
Cluster2	endopeptidase activity	2	56	513	19964	1.39	0.424	F1M7X5 P07756	GO_MF
Cluster2	endopeptidase inhibitor activity	1	56	271	19964	1.32	0.535	G3V7I0	GO_MF
Cluster2	endopeptidase regulator activity	1	56	281	19964	1.27	0.548	G3V7I0	GO_MF
Cluster2	enoyl-CoA hydratase activity	2	56	11	19964	64.82	0.000418	P07896 P14604	GO_MF
Cluster2	enzyme activator activity	1	56	731	19964	0.49	0.877	P97576	GO_MF
Cluster2	enzyme binding	11	56	3826	19964	1.02	0.517	D3ZHR2 F1M7X5 G3V7I0 P07895 P07896 P27615 P63039 P97576 Q2M2R8 Q4FZT0 Q5I0P2	GO_MF
Cluster2	enzyme inhibitor activity	1	56	592	19964	0.6	0.815	G3V7I0	GO_MF
Cluster2	enzyme regulator activity	2	56	1508	19964	0.47	0.932	G3V7I0 P97576	GO_MF
Cluster2	estradiol 17-beta-dehydrogenase activity	1	56	22	19964	16.2	0.06	P97852	GO_MF
Cluster2	exopeptidase activity	1	56	149	19964	2.39	0.343	F1M7X5	GO_MF
Cluster2	fatty acid binding	1	56	91	19964	3.92	0.226	P11915	GO_MF
Cluster2	fatty acid derivative binding	5	56	54	19964	33.01	4.12e-07	G3V796 G3V7J0 P11915 P15650 P97519	GO_MF
Cluster2	fatty acid ligase activity	1	56	29	19964	12.29	0.0783	P18163	GO_MF
Cluster2	fatty-acyl-CoA binding	5	56	33	19964	54.02	3.23e-08	G3V796 G3V7J0 P11915 P15650 P97519	GO_MF
Cluster2	ferrous iron binding	1	56	42	19964	8.49	0.111	Q9ER34	GO_MF
Cluster2	flavin adenine dinucleotide binding	4	56	101	19964	14.12	0.000185	B3DMA2 G3V796 P13803 P15650	GO_MF
Cluster2	fumarylpyruvate hydrolase activity	1	56	1	19964	356.5	0.00281	Q6AYQ8	GO_MF
Cluster2	glutamate binding	1	56	29	19964	12.29	0.0783	P07756	GO_MF
Cluster2	glutaminase activity	1	56	7	19964	50.93	0.0195	P28492	GO_MF
Cluster2	heme-copper terminal oxidase activity	2	56	22	19964	32.41	0.00172	P10888 P12075	GO_MF
Cluster2	heterocyclic compound binding	18	56	4573	19964	1.4	0.0721	B3DMA2 D3Z900 D3ZHR2 F1LN88 G3V6I4 G3V796 G3V7J0 P07756 P07895 P08461 P11915 P13803 P15650 P63039 P85834 P97519 P97576 Q64565	GO_MF
Cluster2	high-density lipoprotein particle binding	1	56	20	19964	17.82	0.0547	P63039	GO_MF
Cluster2	hormone binding	1	56	208	19964	1.71	0.444	P63039	GO_MF
Cluster2	hormone receptor binding	1	56	320	19964	1.11	0.596	Q9Z311	GO_MF
Cluster2	hydro-lyase activity	4	56	67	19964	21.28	3.73e-05	P07896 P14604 P97852 Q9ER34	GO_MF
Cluster2	hydrogen ion transmembrane transporter activity	2	56	150	19964	4.75	0.0664	P10888 P12075	GO_MF
Cluster2	hydrolase activity	8	56	3128	19964	0.91	0.668	D3ZHR2 D3ZIQ1 F1M7X5 G3V7J0 O55171 P07756 P28492 Q6AYQ8	GO_MF
Cluster2	hydrolase activity, acting on acid anhydrides	1	56	1010	19964	0.35	0.946	D3ZHR2	GO_MF
Cluster2	hydrolase activity, acting on ester bonds	3	56	1008	19964	1.06	0.542	D3ZIQ1 G3V7J0 O55171	GO_MF
Cluster2	hydroxymethylglutaryl-CoA lyase activity	1	56	2	19964	178.25	0.0056	P97519	GO_MF
Cluster2	identical protein binding	19	56	3108	19964	2.18	0.000533	D3ZHR2 D4A2K1 F1LN88 F1M7X5 G3V796 G3V7I0 P04636 P07895 P08461 P11915 P97519 P97532 P97576 P97852 Q642G4 Q64565 Q64602 Q6P2A5 Q8VID1	GO_MF
Cluster2	insulin binding	1	56	15	19964	23.77	0.0413	P63039	GO_MF
Cluster2	intramolecular oxidoreductase activity	1	56	76	19964	4.69	0.193	Q5XIC0	GO_MF
Cluster2	ion binding	18	56	3447	19964	1.86	0.00483	B0BNJ4 B3DMA2 D3Z900 D3ZHR2 F1LN88 G3V6I4 G3V796 G3V7J0 P07756 P07895 P11915 P13803 P15650 P26772 P97519 Q4FZT0 Q64565 Q9ER34	GO_MF
Cluster2	ion transmembrane transporter activity	2	56	1388	19964	0.51	0.909	P10888 P12075	GO_MF
Cluster2	iron ion binding	2	56	133	19964	5.36	0.0537	B0BNJ4 Q9ER34	GO_MF
Cluster2	iron-sulfur cluster binding	1	56	41	19964	8.7	0.109	Q9ER34	GO_MF
Cluster2	isomerase activity	2	56	200	19964	3.56	0.108	G3V796 Q5XIC0	GO_MF
Cluster2	kinase activity	1	56	1248	19964	0.29	0.973	Q6P2A5	GO_MF
Cluster2	kinase binding	1	56	1318	19964	0.27	0.978	G3V7I0	GO_MF
Cluster2	kynurenine aminotransferase activity	1	56	6	19964	59.42	0.0167	Q64602	GO_MF
Cluster2	kynurenine-oxoglutarate transaminase activity	1	56	6	19964	59.42	0.0167	Q64602	GO_MF
Cluster2	ligand-dependent nuclear receptor binding	1	56	41	19964	8.7	0.109	Q9Z311	GO_MF
Cluster2	ligase activity	2	56	205	19964	3.48	0.113	P07756 P18163	GO_MF
Cluster2	ligase activity, forming carbon-nitrogen bonds	1	56	63	19964	5.66	0.162	P07756	GO_MF
Cluster2	ligase activity, forming carbon-sulfur bonds	1	56	52	19964	6.86	0.136	P18163	GO_MF
Cluster2	lipid binding	4	56	993	19964	1.44	0.303	P07756 P11915 P63039 Q4FZT0	GO_MF
Cluster2	lipid transporter activity	2	56	212	19964	3.36	0.119	D3ZHR2 P11915	GO_MF
Cluster2	lipopolysaccharide binding	1	56	50	19964	7.13	0.131	P63039	GO_MF
Cluster2	lipoprotein particle binding	1	56	54	19964	6.6	0.141	P63039	GO_MF
Cluster2	long-chain fatty acid binding	1	56	43	19964	8.29	0.114	P11915	GO_MF
Cluster2	long-chain fatty acid transporter activity	1	56	14	19964	25.46	0.0386	D3ZHR2	GO_MF
Cluster2	long-chain fatty acid-CoA ligase activity	1	56	19	19964	18.76	0.052	P18163	GO_MF
Cluster2	long-chain fatty acyl-CoA binding	1	56	13	19964	27.42	0.0359	P11915	GO_MF
Cluster2	long-chain-acyl-CoA dehydrogenase activity	2	56	6	19964	118.83	0.000115	B3DMA2 P15650	GO_MF
Cluster2	long-chain-enoyl-CoA hydratase activity	2	56	6	19964	118.83	0.000115	P07896 P97852	GO_MF
Cluster2	lyase activity	7	56	205	19964	12.17	1.65e-06	D4A2K1 P07896 P14604 P97519 P97852 Q6AYQ8 Q9ER34	GO_MF
Cluster2	macromolecular complex binding	3	56	1875	19964	0.57	0.907	F1M7X5 P07756 P63039	GO_MF
Cluster2	magnesium ion binding	1	56	246	19964	1.45	0.501	P97519	GO_MF
Cluster2	malate dehydrogenase (NADP+) activity	1	56	1	19964	356.5	0.00281	P04636	GO_MF
Cluster2	malate dehydrogenase activity	1	56	13	19964	27.42	0.0359	P04636	GO_MF
Cluster2	manganese ion binding	2	56	73	19964	9.77	0.0179	P07895 P97519	GO_MF
Cluster2	medium-chain-acyl-CoA dehydrogenase activity	2	56	4	19964	178.25	4.62e-05	B3DMA2 G3V796	GO_MF
Cluster2	metal cluster binding	1	56	41	19964	8.7	0.109	Q9ER34	GO_MF
Cluster2	metal ion binding	8	56	1549	19964	1.84	0.066	B0BNJ4 D3Z900 G3V6I4 P07756 P07895 P26772 P97519 Q9ER34	GO_MF
Cluster2	methyltransferase activity	1	56	216	19964	1.65	0.457	Q5I0P2	GO_MF
Cluster2	microtubule binding	1	56	347	19964	1.03	0.626	Q642G4	GO_MF
Cluster2	modified amino acid binding	1	56	138	19964	2.58	0.322	P07756	GO_MF
Cluster2	molecular function regulator	2	56	2563	19964	0.28	0.996	G3V7I0 P97576	GO_MF
Cluster2	molecular transducer activity	1	56	2141	19964	0.17	0.998	P27615	GO_MF
Cluster2	molybdenum ion binding	2	56	12	19964	59.42	0.000501	D3Z900 G3V6I4	GO_MF
Cluster2	molybdopterin cofactor binding	2	56	20	19964	35.65	0.00142	D3Z900 G3V6I4	GO_MF
Cluster2	monocarboxylic acid binding	1	56	140	19964	2.55	0.326	P11915	GO_MF
Cluster2	nitrate reductase activity	2	56	6	19964	118.83	0.000115	D3Z900 G3V6I4	GO_MF
Cluster2	nuclear hormone receptor binding	1	56	282	19964	1.26	0.55	Q9Z311	GO_MF
Cluster2	nucleic acid binding	3	56	3246	19964	0.33	0.997	P07895 P63039 P85834	GO_MF
Cluster2	nucleobase-containing compound kinase activity	1	56	90	19964	3.96	0.224	Q6P2A5	GO_MF
Cluster2	nucleoside phosphate binding	12	56	1268	19964	3.37	0.000168	B3DMA2 D3ZHR2 F1LN88 G3V796 G3V7J0 P07756 P08461 P11915 P13803 P15650 P97519 P97576	GO_MF
Cluster2	nucleoside phosphate kinase activity	1	56	54	19964	6.6	0.141	Q6P2A5	GO_MF
Cluster2	nucleoside triphosphate adenylate kinase activity	1	56	3	19964	118.83	0.00839	Q6P2A5	GO_MF
Cluster2	nucleoside-triphosphatase activity	1	56	949	19964	0.38	0.935	D3ZHR2	GO_MF
Cluster2	nucleoside-triphosphatase regulator activity	1	56	464	19964	0.77	0.733	P97576	GO_MF
Cluster2	nucleotide binding	12	56	1267	19964	3.38	0.000167	B3DMA2 D3ZHR2 F1LN88 G3V796 G3V7J0 P07756 P08461 P11915 P13803 P15650 P97519 P97576	GO_MF
Cluster2	oleic acid binding	1	56	13	19964	27.42	0.0359	P11915	GO_MF
Cluster2	organic acid binding	3	56	349	19964	3.06	0.0746	P07756 P11915 P97519	GO_MF
Cluster2	organic cyclic compound binding	18	56	4701	19964	1.37	0.0899	B3DMA2 D3Z900 D3ZHR2 F1LN88 G3V6I4 G3V796 G3V7J0 P07756 P07895 P08461 P11915 P13803 P15650 P63039 P85834 P97519 P97576 Q64565	GO_MF
Cluster2	oxaloacetate decarboxylase activity	1	56	1	19964	356.5	0.00281	Q6AYQ8	GO_MF
Cluster2	oxidoreductase activity	26	56	1099	19964	8.43	1.85e-18	A2VCW9 B0BNJ4 B3DMA2 D3Z900 D3ZLT1 F1LN88 G3V6I4 G3V796 G3V7I0 G3V7J0 P04636 P07895 P07896 P10888 P12075 P13803 P15650 P29266 P97852 Q5XIH3 Q64057 Q8VID1 Q9WVK3 Q9WVK7 Q9Z2M4 Q9Z311	GO_MF
Cluster2	oxidoreductase activity, acting on NAD(P)H	3	56	159	19964	6.73	0.0101	D3ZLT1 Q5XIH3 Q8VID1	GO_MF
Cluster2	oxo-acid-lyase activity	2	56	5	19964	142.6	7.69e-05	D4A2K1 P97519	GO_MF
Cluster2	oxygen binding	1	56	67	19964	5.32	0.172	P07895	GO_MF
Cluster2	p53 binding	1	56	128	19964	2.79	0.303	P63039	GO_MF
Cluster2	palmitoyl-CoA hydrolase activity	1	56	22	19964	16.2	0.06	O55171	GO_MF
Cluster2	palmitoyl-CoA oxidase activity	1	56	7	19964	50.93	0.0195	P15650	GO_MF
Cluster2	peptidase activity	2	56	783	19964	0.91	0.651	F1M7X5 P07756	GO_MF
Cluster2	peptidase inhibitor activity	1	56	286	19964	1.25	0.555	G3V7I0	GO_MF
Cluster2	peptidase regulator activity	1	56	343	19964	1.04	0.622	G3V7I0	GO_MF
Cluster2	peptide binding	3	56	608	19964	1.76	0.243	F1M7X5 P63039 Q2M2R8	GO_MF
Cluster2	peptide hormone binding	1	56	104	19964	3.43	0.254	P63039	GO_MF
Cluster2	peroxidase activity	1	56	57	19964	6.25	0.148	G3V7I0	GO_MF
Cluster2	peroxiredoxin activity	1	56	14	19964	25.46	0.0386	G3V7I0	GO_MF
Cluster2	peroxisome matrix targeting signal-1 binding	1	56	7	19964	50.93	0.0195	Q2M2R8	GO_MF
Cluster2	peroxisome targeting sequence binding	1	56	13	19964	27.42	0.0359	Q2M2R8	GO_MF
Cluster2	phosphatidylcholine transporter activity	1	56	17	19964	20.97	0.0466	P11915	GO_MF
Cluster2	phosphatidylethanolamine transporter activity	1	56	8	19964	44.56	0.0222	P11915	GO_MF
Cluster2	phosphatidylglycerol binding	1	56	19	19964	18.76	0.052	Q4FZT0	GO_MF
Cluster2	phosphatidylinositol transporter activity	1	56	16	19964	22.28	0.044	P11915	GO_MF
Cluster2	phospholipid binding	2	56	595	19964	1.2	0.501	P07756 Q4FZT0	GO_MF
Cluster2	phospholipid transporter activity	1	56	82	19964	4.35	0.206	P11915	GO_MF
Cluster2	primary active transmembrane transporter activity	1	56	197	19964	1.81	0.427	D3ZHR2	GO_MF
Cluster2	protease binding	2	56	270	19964	2.64	0.175	F1M7X5 P63039	GO_MF
Cluster2	protein C-terminus binding	2	56	443	19964	1.61	0.354	G3V7I0 Q2M2R8	GO_MF
Cluster2	protein N-terminus binding	2	56	238	19964	3	0.144	Q2M2R8 Q642G4	GO_MF
Cluster2	protein binding	32	56	10452	19964	1.09	0.28	D3ZHR2 D3ZIQ1 D4A2K1 F1LN88 F1M7X5 G3V796 G3V7I0 O55171 P04636 P07895 P07896 P08461 P11915 P26772 P27615 P63039 P97519 P97532 P97576 P97852 Q2M2R8 Q4FZT0 Q5I0P2 Q5XIC0 Q642G4 Q64565 Q64602 Q6P2A5 Q8VID1 Q9WVK3 Q9Z2M4 Q9Z311	GO_MF
Cluster2	protein binding involved in protein folding	1	56	32	19964	11.14	0.086	P63039	GO_MF
Cluster2	protein dimerization activity	10	56	2135	19964	1.67	0.0712	D3ZHR2 D4A2K1 F1M7X5 P04636 P11915 P63039 P97519 P97576 P97852 Q64602	GO_MF
Cluster2	protein heterodimerization activity	2	56	914	19964	0.78	0.733	P11915 P63039	GO_MF
Cluster2	protein homodimerization activity	9	56	1530	19964	2.1	0.0256	D3ZHR2 D4A2K1 F1M7X5 P04636 P11915 P97519 P97576 P97852 Q64602	GO_MF
Cluster2	protein kinase binding	1	56	1179	19964	0.3	0.967	G3V7I0	GO_MF
Cluster2	protein self-association	1	56	111	19964	3.21	0.269	P04636	GO_MF
Cluster2	protein-lipid complex binding	1	56	54	19964	6.6	0.141	P63039	GO_MF
Cluster2	purine nucleotide binding	8	56	1008	19964	2.83	0.00677	D3ZHR2 G3V796 G3V7J0 P07756 P11915 P15650 P97519 P97576	GO_MF
Cluster2	purine ribonucleoside triphosphate binding	2	56	832	19964	0.86	0.684	D3ZHR2 P07756	GO_MF
Cluster2	purine ribonucleotide binding	7	56	982	19964	2.54	0.0194	D3ZHR2 G3V796 G3V7J0 P07756 P11915 P15650 P97519	GO_MF
Cluster2	pyridoxal phosphate binding	1	56	47	19964	7.59	0.124	Q64565	GO_MF
Cluster2	pyrophosphatase activity	1	56	1007	19964	0.35	0.945	D3ZHR2	GO_MF
Cluster2	receptor binding	14	56	2633	19964	1.9	0.0122	D3ZIQ1 F1M7X5 O55171 P07896 P11915 P97519 P97852 Q4FZT0 Q5XIC0 Q642G4 Q8VID1 Q9WVK3 Q9Z2M4 Q9Z311	GO_MF
Cluster2	retinal dehydrogenase activity	1	56	19	19964	18.76	0.052	Q8VID1	GO_MF
Cluster2	ribonucleotide binding	7	56	1009	19964	2.47	0.0221	D3ZHR2 G3V796 G3V7J0 P07756 P11915 P15650 P97519	GO_MF
Cluster2	saccharopine dehydrogenase activity	1	56	2	19964	178.25	0.0056	A2VCW9	GO_MF
Cluster2	scavenger receptor activity	1	56	38	19964	9.38	0.101	P27615	GO_MF
Cluster2	serine hydrolase activity	1	56	312	19964	1.14	0.587	F1M7X5	GO_MF
Cluster2	serine-type endopeptidase activity	1	56	247	19964	1.44	0.502	F1M7X5	GO_MF
Cluster2	serine-type peptidase activity	1	56	302	19964	1.18	0.575	F1M7X5	GO_MF
Cluster2	signal sequence binding	1	56	67	19964	5.32	0.172	Q2M2R8	GO_MF
Cluster2	signaling receptor activity	1	56	2127	19964	0.17	0.998	P27615	GO_MF
Cluster2	small GTPase binding	1	56	785	19964	0.45	0.895	Q2M2R8	GO_MF
Cluster2	small molecule binding	14	56	1840	19964	2.71	0.000431	B3DMA2 D3ZHR2 F1LN88 G3V796 G3V7J0 P07756 P07895 P08461 P11915 P13803 P15650 P97519 P97576 Q64565	GO_MF
Cluster2	steroid binding	1	56	164	19964	2.17	0.37	P11915	GO_MF
Cluster2	steroid dehydrogenase activity	1	56	58	19964	6.15	0.151	P97852	GO_MF
Cluster2	sterol binding	1	56	71	19964	5.02	0.181	P11915	GO_MF
Cluster2	sterol transporter activity	1	56	34	19964	10.49	0.0912	P11915	GO_MF
Cluster2	succinyl-CoA hydrolase activity	1	56	1	19964	356.5	0.00281	D3ZIQ1	GO_MF
Cluster2	sulfur compound binding	5	56	414	19964	4.31	0.00601	G3V796 G3V7J0 P11915 P15650 P97519	GO_MF
Cluster2	sulfur dioxygenase activity	1	56	1	19964	356.5	0.00281	B0BNJ4	GO_MF
Cluster2	sulfurtransferase activity	1	56	14	19964	25.46	0.0386	P97532	GO_MF
Cluster2	superoxide dismutase activity	1	56	4	19964	89.12	0.0112	P07895	GO_MF
Cluster2	testosterone dehydrogenase [NAD(P)] activity	1	56	13	19964	27.42	0.0359	P97852	GO_MF
Cluster2	thiolester hydrolase activity	3	56	64	19964	16.71	0.000772	D3ZIQ1 G3V7J0 O55171	GO_MF
Cluster2	thioredoxin peroxidase activity	1	56	12	19964	29.71	0.0332	G3V7I0	GO_MF
Cluster2	thiosulfate sulfurtransferase activity	1	56	3	19964	118.83	0.00839	P97532	GO_MF
Cluster2	trans-2-enoyl-CoA reductase (NADPH) activity	3	56	8	19964	133.69	1.16e-06	Q9WVK3 Q9Z2M4 Q9Z311	GO_MF
Cluster2	transaminase activity	2	56	33	19964	21.61	0.00386	Q64565 Q64602	GO_MF
Cluster2	transcription cofactor activity	1	56	814	19964	0.44	0.903	Q642G4	GO_MF
Cluster2	transcription corepressor activity	1	56	343	19964	1.04	0.622	Q642G4	GO_MF
Cluster2	transcription factor binding	1	56	1112	19964	0.32	0.96	Q9Z311	GO_MF
Cluster2	transferase activity	7	56	3070	19964	0.81	0.778	P08461 P11915 P97532 Q5I0P2 Q64565 Q64602 Q6P2A5	GO_MF
Cluster2	transferase activity, transferring acyl groups	2	56	304	19964	2.35	0.21	P08461 P11915	GO_MF
Cluster2	transition metal ion binding	6	56	804	19964	2.66	0.0246	B0BNJ4 D3Z900 G3V6I4 P07895 P97519 Q9ER34	GO_MF
Cluster2	translation elongation factor activity	1	56	14	19964	25.46	0.0386	P85834	GO_MF
Cluster2	translation factor activity, RNA binding	1	56	95	19964	3.75	0.235	P85834	GO_MF
Cluster2	transmembrane signaling receptor activity	1	56	1797	19964	0.2	0.995	P27615	GO_MF
Cluster2	transmembrane transporter activity	5	56	1610	19964	1.11	0.475	D3ZHR2 P10888 P12075 P19511 P21571	GO_MF
Cluster2	transporter activity	6	56	1854	19964	1.15	0.421	D3ZHR2 P10888 P11915 P12075 P19511 P21571	GO_MF
Cluster2	tubulin binding	1	56	482	19964	0.74	0.746	Q642G4	GO_MF
Cluster2	ubiquitin protein ligase binding	1	56	505	19964	0.71	0.762	P63039	GO_MF
Cluster2	ubiquitin-like protein ligase binding	1	56	523	19964	0.68	0.774	P63039	GO_MF
Cluster2	unfolded protein binding	3	56	141	19964	7.59	0.00727	P26772 P63039 P97576	GO_MF
Cluster2	very-long-chain-acyl-CoA dehydrogenase activity	1	56	4	19964	89.12	0.0112	B3DMA2	GO_MF
Cluster2	virus receptor activity	1	56	44	19964	8.1	0.116	F1M7X5	GO_MF
Cluster2	vitamin B6 binding	1	56	48	19964	7.43	0.126	Q64565	GO_MF
Cluster2	vitamin binding	1	56	123	19964	2.9	0.293	Q64565	GO_MF
Cluster3	3,4-dihydrocoumarin hydrolase activity	1	37	1	19964	539.57	0.00185	Q68FP2	GO_MF
Cluster3	ADP binding	1	37	67	19964	8.05	0.117	P46462	GO_MF
Cluster3	ATP binding	1	37	600	19964	0.9	0.677	P46462	GO_MF
Cluster3	ATPase activator activity	1	37	32	19964	16.86	0.0577	Q9WVB1	GO_MF
Cluster3	ATPase activity	2	37	598	19964	1.8	0.305	M0R890 P46462	GO_MF
Cluster3	ATPase activity, coupled	1	37	482	19964	1.12	0.595	M0R890	GO_MF
Cluster3	ATPase activity, coupled to movement of substances	1	37	209	19964	2.58	0.323	M0R890	GO_MF
Cluster3	ATPase binding	1	37	184	19964	2.93	0.29	Q9WVB1	GO_MF
Cluster3	ATPase regulator activity	1	37	52	19964	10.38	0.0921	Q9WVB1	GO_MF
Cluster3	BAT3 complex binding	1	37	4	19964	134.89	0.00739	P46462	GO_MF
Cluster3	DNA binding	2	37	2204	19964	0.49	0.926	F1LM05 P02770	GO_MF
Cluster3	FMN binding	1	37	23	19964	23.46	0.0418	P00388	GO_MF
Cluster3	G-protein alpha-subunit binding	1	37	66	19964	8.18	0.115	Q63083	GO_MF
Cluster3	GTP binding	2	37	250	19964	4.32	0.0782	Q6NYB7 Q9WVB1	GO_MF
Cluster3	GTPase activity	2	37	299	19964	3.61	0.106	Q6NYB7 Q9WVB1	GO_MF
Cluster3	K48-linked polyubiquitin binding	1	37	7	19964	77.08	0.0129	P46462	GO_MF
Cluster3	MHC class I protein binding	1	37	39	19964	13.84	0.0699	P46462	GO_MF
Cluster3	MHC protein binding	1	37	55	19964	9.81	0.0971	P46462	GO_MF
Cluster3	N,N-dimethylaniline monooxygenase activity	1	37	10	19964	53.96	0.0184	P36365	GO_MF
Cluster3	NADP binding	1	37	66	19964	8.18	0.115	P00388	GO_MF
Cluster3	NADPH-hemoprotein reductase activity	1	37	17	19964	31.74	0.0311	P00388	GO_MF
Cluster3	UDP-glycosyltransferase activity	3	37	171	19964	9.47	0.00387	P08542 Q09325 Q64550	GO_MF
Cluster3	acetylglucosaminyltransferase activity	1	37	50	19964	10.79	0.0887	Q09325	GO_MF
Cluster3	active transmembrane transporter activity	2	37	557	19964	1.94	0.276	M0R890 O35913	GO_MF
Cluster3	adenyl nucleotide binding	1	37	730	19964	0.74	0.748	P46462	GO_MF
Cluster3	adenyl ribonucleotide binding	1	37	716	19964	0.75	0.741	P46462	GO_MF
Cluster3	alcohol binding	2	37	125	19964	8.63	0.0225	D4A8N1 P02650	GO_MF
Cluster3	alpha-mannosidase activity	1	37	21	19964	25.69	0.0382	D3ZR49	GO_MF
Cluster3	amide binding	1	37	689	19964	0.78	0.728	P02650	GO_MF
Cluster3	amide transmembrane transporter activity	1	37	65	19964	8.3	0.114	O35913	GO_MF
Cluster3	anion binding	9	37	2306	19964	2.11	0.0223	P00388 P02650 P02770 P46462 P55159 Q3KR94 Q64550 Q6NYB7 Q9WVB1	GO_MF
Cluster3	anion transmembrane transporter activity	1	37	540	19964	1	0.638	O35913	GO_MF
Cluster3	antioxidant activity	2	37	114	19964	9.47	0.0189	P02650 P02770	GO_MF
Cluster3	arachidonic acid epoxygenase activity	2	37	72	19964	14.99	0.00787	P08683 P13107	GO_MF
Cluster3	arachidonic acid monooxygenase activity	2	37	77	19964	14.01	0.00896	P08683 P13107	GO_MF
Cluster3	aryldialkylphosphatase activity	1	37	1	19964	539.57	0.00185	P55159	GO_MF
Cluster3	arylesterase activity	2	37	8	19964	134.89	9.29e-05	P55159 Q68FP2	GO_MF
Cluster3	asialoglycoprotein receptor activity	1	37	4	19964	134.89	0.00739	P02706	GO_MF
Cluster3	beta-amyloid binding	1	37	128	19964	4.22	0.212	P02650	GO_MF
Cluster3	bile acid transmembrane transporter activity	1	37	55	19964	9.81	0.0971	O35913	GO_MF
Cluster3	binding	25	37	14341	19964	0.94	0.78	B0BNG3 D4A8N1 F1LM05 G3V635 G3V7K3 G3V8G5 P00388 P02650 P02706 P02770 P05183 P08683 P13107 P46462 P51538 P55159 Q06884 Q3KR94 Q63041 Q63081 Q63083 Q64550 Q68FP2 Q6NYB7 Q9WVB1	GO_MF
Cluster3	brain-derived neurotrophic factor binding	1	37	8	19964	67.45	0.0147	Q63041	GO_MF
Cluster3	caffeine oxidase activity	4	37	29	19964	74.42	2.29e-07	G3V635 P05183 P51538 Q06884	GO_MF
Cluster3	calcium ion binding	3	37	564	19964	2.87	0.086	P55159 Q63081 Q63083	GO_MF
Cluster3	calcium-dependent phospholipase C activity	1	37	4	19964	134.89	0.00739	A0A096MJW5	GO_MF
Cluster3	carbohydrate binding	2	37	244	19964	4.42	0.0749	B0BNG3 D4A8N1	GO_MF
Cluster3	carbohydrate derivative binding	6	37	1506	19964	2.15	0.0567	P00388 P02650 P46462 Q3KR94 Q6NYB7 Q9WVB1	GO_MF
Cluster3	carboxylic acid binding	2	37	340	19964	3.17	0.131	P02770 Q64550	GO_MF
Cluster3	carboxylic acid transmembrane transporter activity	1	37	254	19964	2.12	0.378	O35913	GO_MF
Cluster3	carboxylic ester hydrolase activity	4	37	194	19964	11.13	0.000444	P16303 P55159 Q64573 Q68FP2	GO_MF
Cluster3	cargo receptor activity	1	37	100	19964	5.4	0.17	P02706	GO_MF
Cluster3	catalytic activity	24	37	7542	19964	1.72	0.000755	A0A096MJW5 D3ZR49 D4A8N1 G3V635 G3V7K3 M0R890 P00388 P05183 P08542 P08683 P13107 P16303 P36365 P46462 P51538 P55159 Q06884 Q09325 Q63081 Q64550 Q64573 Q68FP2 Q6NYB7 Q9WVB1	GO_MF
Cluster3	cation binding	10	37	1708	19964	3.16	0.00083	G3V635 G3V7K3 P02650 P02770 P05183 P51538 P55159 Q06884 Q63081 Q63083	GO_MF
Cluster3	cell adhesion molecule binding	1	37	391	19964	1.38	0.519	Q3KR94	GO_MF
Cluster3	chaperone binding	2	37	166	19964	6.5	0.0378	G3V7K3 P02770	GO_MF
Cluster3	cholesterol binding	1	37	66	19964	8.18	0.115	P02650	GO_MF
Cluster3	cholesterol transporter activity	1	37	22	19964	24.53	0.04	P02650	GO_MF
Cluster3	coenzyme binding	2	37	330	19964	3.27	0.125	P00388 P02770	GO_MF
Cluster3	cofactor binding	3	37	553	19964	2.93	0.0822	P00388 P02770 P13107	GO_MF
Cluster3	collagen binding	1	37	125	19964	4.32	0.208	Q3KR94	GO_MF
Cluster3	copper ion binding	2	37	92	19964	11.73	0.0126	G3V7K3 P02770	GO_MF
Cluster3	cysteine-type endopeptidase inhibitor activity	1	37	115	19964	4.69	0.193	F1LM05	GO_MF
Cluster3	cytoskeletal protein binding	2	37	1382	19964	0.78	0.736	P02650 Q9WVB1	GO_MF
Cluster3	demethylase activity	4	37	70	19964	30.83	8.39e-06	G3V635 P05183 P51538 Q06884	GO_MF
Cluster3	deubiquitinase activator activity	1	37	2	19964	269.78	0.0037	P46462	GO_MF
Cluster3	dioxygenase activity	1	37	106	19964	5.09	0.179	P00388	GO_MF
Cluster3	disulfide oxidoreductase activity	1	37	82	19964	6.58	0.141	Q63081	GO_MF
Cluster3	drug binding	8	37	1043	19964	4.14	0.000538	G3V635 P02770 P05183 P08683 P46462 P51538 Q06884 Q64550	GO_MF
Cluster3	drug transmembrane transporter activity	1	37	156	19964	3.46	0.252	O35913	GO_MF
Cluster3	electron carrier activity	1	37	125	19964	4.32	0.208	P00388	GO_MF
Cluster3	endopeptidase inhibitor activity	3	37	271	19964	5.97	0.0137	F1LM05 P24090 Q63041	GO_MF
Cluster3	endopeptidase regulator activity	3	37	281	19964	5.76	0.0151	F1LM05 P24090 Q63041	GO_MF
Cluster3	enzyme activator activity	3	37	731	19964	2.21	0.153	P02650 P46462 Q9WVB1	GO_MF
Cluster3	enzyme binding	9	37	3826	19964	1.27	0.269	G3V635 P00388 P02770 P05183 P46462 P51538 Q06884 Q64550 Q9WVB1	GO_MF
Cluster3	enzyme inhibitor activity	6	37	592	19964	5.47	0.000704	D4A6E3 F1LM05 P14046 P24090 Q63041 Q64550	GO_MF
Cluster3	enzyme regulator activity	9	37	1508	19964	3.22	0.0014	D4A6E3 F1LM05 P02650 P14046 P24090 P46462 Q63041 Q64550 Q9WVB1	GO_MF
Cluster3	estrogen 16-alpha-hydroxylase activity	4	37	29	19964	74.42	2.29e-07	G3V635 P05183 P51538 Q06884	GO_MF
Cluster3	extracellular matrix binding	1	37	92	19964	5.86	0.157	Q3KR94	GO_MF
Cluster3	fatty acid binding	2	37	91	19964	11.86	0.0123	P02770 Q64550	GO_MF
Cluster3	ferroxidase activity	1	37	9	19964	59.95	0.0166	G3V7K3	GO_MF
Cluster3	fibroblast growth factor binding	1	37	44	19964	12.26	0.0785	G3V8G5	GO_MF
Cluster3	flavin adenine dinucleotide binding	1	37	101	19964	5.34	0.171	P00388	GO_MF
Cluster3	glucuronosyltransferase activity	2	37	51	19964	21.16	0.00402	P08542 Q64550	GO_MF
Cluster3	glycosaminoglycan binding	2	37	350	19964	3.08	0.137	P02650 Q3KR94	GO_MF
Cluster3	growth factor binding	2	37	246	19964	4.39	0.076	G3V8G5 Q63041	GO_MF
Cluster3	guanyl nucleotide binding	2	37	304	19964	3.55	0.109	Q6NYB7 Q9WVB1	GO_MF
Cluster3	guanyl ribonucleotide binding	2	37	299	19964	3.61	0.106	Q6NYB7 Q9WVB1	GO_MF
Cluster3	heat shock protein binding	1	37	220	19964	2.45	0.337	B0BNG3	GO_MF
Cluster3	heme binding	1	37	142	19964	3.8	0.232	P13107	GO_MF
Cluster3	heparin binding	2	37	251	19964	4.3	0.0787	P02650 Q3KR94	GO_MF
Cluster3	heterocyclic compound binding	7	37	4573	19964	0.83	0.776	F1LM05 P00388 P02770 P13107 P46462 Q6NYB7 Q9WVB1	GO_MF
Cluster3	high-density lipoprotein particle binding	1	37	20	19964	26.98	0.0364	P55159	GO_MF
Cluster3	hydrolase activity	11	37	3128	19964	1.9	0.0228	A0A096MJW5 D3ZR49 M0R890 P00388 P16303 P46462 P55159 Q64573 Q68FP2 Q6NYB7 Q9WVB1	GO_MF
Cluster3	hydrolase activity, acting on acid anhydrides	4	37	1010	19964	2.14	0.115	M0R890 P46462 Q6NYB7 Q9WVB1	GO_MF
Cluster3	hydrolase activity, acting on ester bonds	5	37	1008	19964	2.68	0.0371	A0A096MJW5 P16303 P55159 Q64573 Q68FP2	GO_MF
Cluster3	hydrolase activity, acting on glycosyl bonds	1	37	168	19964	3.21	0.269	D3ZR49	GO_MF
Cluster3	hydroxyapatite binding	1	37	6	19964	89.93	0.0111	P02650	GO_MF
Cluster3	identical protein binding	8	37	3108	19964	1.39	0.209	P02650 P02706 P02770 P46462 P55159 Q3KR94 Q64550 Q68FP2	GO_MF
Cluster3	integrin binding	1	37	226	19964	2.39	0.344	Q3KR94	GO_MF
Cluster3	intramolecular oxidoreductase activity	1	37	76	19964	7.1	0.132	Q63081	GO_MF
Cluster3	ion binding	16	37	3447	19964	2.5	0.000197	G3V635 G3V7K3 P00388 P02650 P02770 P05183 P46462 P51538 P55159 Q06884 Q3KR94 Q63081 Q63083 Q64550 Q6NYB7 Q9WVB1	GO_MF
Cluster3	ion transmembrane transporter activity	1	37	1388	19964	0.39	0.931	O35913	GO_MF
Cluster3	iron ion binding	4	37	133	19964	16.23	0.000105	G3V635 P05183 P51538 Q06884	GO_MF
Cluster3	iron-cytochrome-c reductase activity	1	37	1	19964	539.57	0.00185	P00388	GO_MF
Cluster3	isomerase activity	1	37	200	19964	2.7	0.311	Q63081	GO_MF
Cluster3	isoprenoid binding	1	37	53	19964	10.18	0.0938	Q64550	GO_MF
Cluster3	kinase inhibitor activity	1	37	139	19964	3.88	0.228	P24090	GO_MF
Cluster3	kinase regulator activity	1	37	343	19964	1.57	0.474	P24090	GO_MF
Cluster3	lactonohydrolase activity	1	37	2	19964	269.78	0.0037	Q68FP2	GO_MF
Cluster3	lipase activity	3	37	208	19964	7.78	0.00667	A0A096MJW5 P16303 Q64573	GO_MF
Cluster3	lipid binding	8	37	993	19964	4.35	0.000387	G3V635 P02650 P02770 P05183 P51538 P55159 Q06884 Q64550	GO_MF
Cluster3	lipid transporter activity	2	37	212	19964	5.09	0.0586	O35913 P02650	GO_MF
Cluster3	lipoprotein particle binding	2	37	54	19964	19.98	0.0045	P02650 P55159	GO_MF
Cluster3	lipoprotein particle receptor binding	1	37	59	19964	9.15	0.104	P02650	GO_MF
Cluster3	low-density lipoprotein particle receptor binding	1	37	50	19964	10.79	0.0887	P02650	GO_MF
Cluster3	macromolecular complex binding	5	37	1875	19964	1.44	0.265	P02650 P46462 P55159 Q3KR94 Q63041	GO_MF
Cluster3	mannose binding	2	37	37	19964	29.17	0.00214	B0BNG3 D4A8N1	GO_MF
Cluster3	mannosidase activity	1	37	22	19964	24.53	0.04	D3ZR49	GO_MF
Cluster3	mannosyl-oligosaccharide mannosidase activity	1	37	14	19964	38.54	0.0256	D3ZR49	GO_MF
Cluster3	mannosyltransferase activity	1	37	24	19964	22.48	0.0436	D4A8N1	GO_MF
Cluster3	metal chelating activity	1	37	2	19964	269.78	0.0037	P02650	GO_MF
Cluster3	metal ion binding	10	37	1549	19964	3.48	0.000383	G3V635 G3V7K3 P02650 P02770 P05183 P51538 P55159 Q06884 Q63081 Q63083	GO_MF
Cluster3	methotrexate transporter activity	1	37	10	19964	53.96	0.0184	O35913	GO_MF
Cluster3	molecular function regulator	9	37	2563	19964	1.89	0.0408	D4A6E3 F1LM05 P02650 P14046 P24090 P46462 Q63041 Q64550 Q9WVB1	GO_MF
Cluster3	monocarboxylic acid binding	2	37	140	19964	7.71	0.0277	P02770 Q64550	GO_MF
Cluster3	monooxygenase activity	7	37	189	19964	19.98	4.94e-08	G3V635 P05183 P08683 P13107 P36365 P51538 Q06884	GO_MF
Cluster3	monosaccharide binding	2	37	111	19964	9.72	0.018	B0BNG3 D4A8N1	GO_MF
Cluster3	myosin V binding	1	37	30	19964	17.99	0.0542	Q9WVB1	GO_MF
Cluster3	myosin binding	1	37	113	19964	4.77	0.19	Q9WVB1	GO_MF
Cluster3	nerve growth factor binding	1	37	19	19964	28.4	0.0346	Q63041	GO_MF
Cluster3	neurotrophin binding	1	37	26	19964	20.75	0.0471	Q63041	GO_MF
Cluster3	nitric oxide dioxygenase activity	1	37	2	19964	269.78	0.0037	P00388	GO_MF
Cluster3	nucleic acid binding	2	37	3246	19964	0.33	0.989	F1LM05 P02770	GO_MF
Cluster3	nucleoside binding	2	37	285	19964	3.79	0.0977	Q6NYB7 Q9WVB1	GO_MF
Cluster3	nucleoside phosphate binding	4	37	1268	19964	1.7	0.206	P00388 P46462 Q6NYB7 Q9WVB1	GO_MF
Cluster3	nucleoside-triphosphatase activity	4	37	949	19964	2.27	0.0972	M0R890 P46462 Q6NYB7 Q9WVB1	GO_MF
Cluster3	nucleoside-triphosphatase regulator activity	1	37	464	19964	1.16	0.581	Q9WVB1	GO_MF
Cluster3	nucleotide binding	4	37	1267	19964	1.7	0.206	P00388 P46462 Q6NYB7 Q9WVB1	GO_MF
Cluster3	organic acid binding	2	37	349	19964	3.09	0.136	P02770 Q64550	GO_MF
Cluster3	organic acid transmembrane transporter activity	1	37	254	19964	2.12	0.378	O35913	GO_MF
Cluster3	organic anion transmembrane transporter activity	1	37	369	19964	1.46	0.499	O35913	GO_MF
Cluster3	organic cyclic compound binding	13	37	4701	19964	1.49	0.0751	F1LM05 G3V635 P00388 P02650 P02770 P05183 P13107 P46462 P51538 Q06884 Q64550 Q6NYB7 Q9WVB1	GO_MF
Cluster3	oxidoreductase activity	10	37	1099	19964	4.91	2.18e-05	G3V635 G3V7K3 P00388 P05183 P08683 P13107 P36365 P51538 Q06884 Q63081	GO_MF
Cluster3	oxidoreductase activity, acting on NAD(P)H	1	37	159	19964	3.39	0.256	P00388	GO_MF
Cluster3	oxidoreductase activity, oxidizing metal ions	1	37	22	19964	24.53	0.04	G3V7K3	GO_MF
Cluster3	oxygen binding	5	37	67	19964	40.27	1.47e-07	G3V635 P05183 P08683 P51538 Q06884	GO_MF
Cluster3	peptidase activator activity	1	37	64	19964	8.43	0.112	P46462	GO_MF
Cluster3	peptidase inhibitor activity	5	37	286	19964	9.43	0.000174	D4A6E3 F1LM05 P14046 P24090 Q63041	GO_MF
Cluster3	peptidase regulator activity	6	37	343	19964	9.44	3.65e-05	D4A6E3 F1LM05 P14046 P24090 P46462 Q63041	GO_MF
Cluster3	peptide binding	1	37	608	19964	0.89	0.682	P02650	GO_MF
Cluster3	peptide disulfide oxidoreductase activity	1	37	37	19964	14.58	0.0664	Q63081	GO_MF
Cluster3	phosphatase activity	1	37	382	19964	1.41	0.511	P55159	GO_MF
Cluster3	phosphatase binding	1	37	359	19964	1.5	0.489	P46462	GO_MF
Cluster3	phosphatidylinositol phospholipase C activity	1	37	49	19964	11.01	0.087	A0A096MJW5	GO_MF
Cluster3	phospholipase C activity	1	37	56	19964	9.64	0.0988	A0A096MJW5	GO_MF
Cluster3	phospholipase activity	1	37	160	19964	3.37	0.258	A0A096MJW5	GO_MF
Cluster3	phospholipid binding	2	37	595	19964	1.81	0.303	P02650 P55159	GO_MF
Cluster3	phosphoric diester hydrolase activity	1	37	149	19964	3.62	0.242	A0A096MJW5	GO_MF
Cluster3	phosphoric ester hydrolase activity	2	37	534	19964	2.02	0.26	A0A096MJW5 P55159	GO_MF
Cluster3	polyubiquitin binding	1	37	66	19964	8.18	0.115	P46462	GO_MF
Cluster3	primary active transmembrane transporter activity	1	37	197	19964	2.74	0.307	M0R890	GO_MF
Cluster3	protease binding	1	37	270	19964	2	0.396	P46462	GO_MF
Cluster3	protein binding	19	37	10452	19964	0.98	0.614	B0BNG3 G3V635 G3V7K3 G3V8G5 P00388 P02650 P02706 P02770 P05183 P46462 P51538 P55159 Q06884 Q3KR94 Q63041 Q63083 Q64550 Q68FP2 Q9WVB1	GO_MF
Cluster3	protein dimerization activity	5	37	2135	19964	1.26	0.362	P02650 P02706 P55159 Q64550 Q68FP2	GO_MF
Cluster3	protein disulfide isomerase activity	1	37	27	19964	19.98	0.0489	Q63081	GO_MF
Cluster3	protein domain specific binding	2	37	1353	19964	0.8	0.725	P46462 Q9WVB1	GO_MF
Cluster3	protein heterodimerization activity	1	37	914	19964	0.59	0.824	Q64550	GO_MF
Cluster3	protein homodimerization activity	5	37	1530	19964	1.76	0.15	P02650 P02706 P55159 Q64550 Q68FP2	GO_MF
Cluster3	protein kinase inhibitor activity	1	37	133	19964	4.06	0.219	P24090	GO_MF
Cluster3	protein kinase regulator activity	1	37	306	19964	1.76	0.436	P24090	GO_MF
Cluster3	protein phosphatase binding	1	37	296	19964	1.82	0.425	P46462	GO_MF
Cluster3	protein tyrosine kinase inhibitor activity	1	37	10	19964	53.96	0.0184	P24090	GO_MF
Cluster3	protein-lipid complex binding	2	37	54	19964	19.98	0.0045	P02650 P55159	GO_MF
Cluster3	purine nucleoside binding	2	37	276	19964	3.91	0.0925	Q6NYB7 Q9WVB1	GO_MF
Cluster3	purine nucleotide binding	3	37	1008	19964	1.61	0.287	P46462 Q6NYB7 Q9WVB1	GO_MF
Cluster3	purine ribonucleoside binding	2	37	271	19964	3.98	0.0897	Q6NYB7 Q9WVB1	GO_MF
Cluster3	purine ribonucleoside triphosphate binding	3	37	832	19964	1.95	0.199	P46462 Q6NYB7 Q9WVB1	GO_MF
Cluster3	purine ribonucleotide binding	3	37	982	19964	1.65	0.273	P46462 Q6NYB7 Q9WVB1	GO_MF
Cluster3	pyridoxal phosphate binding	1	37	47	19964	11.48	0.0836	P02770	GO_MF
Cluster3	pyrophosphatase activity	4	37	1007	19964	2.14	0.114	M0R890 P46462 Q6NYB7 Q9WVB1	GO_MF
Cluster3	receptor binding	4	37	2633	19964	0.82	0.737	G3V8G5 P02650 P46462 Q3KR94	GO_MF
Cluster3	retinoic acid binding	1	37	32	19964	16.86	0.0577	Q64550	GO_MF
Cluster3	retinoid binding	1	37	50	19964	10.79	0.0887	Q64550	GO_MF
Cluster3	ribonucleoside binding	2	37	273	19964	3.95	0.0908	Q6NYB7 Q9WVB1	GO_MF
Cluster3	ribonucleotide binding	4	37	1009	19964	2.14	0.115	P00388 P46462 Q6NYB7 Q9WVB1	GO_MF
Cluster3	serine-type endopeptidase inhibitor activity	1	37	113	19964	4.77	0.19	F1LM05	GO_MF
Cluster3	small molecule binding	14	37	1840	19964	4.11	2.41e-06	B0BNG3 D4A8N1 G3V635 P00388 P02650 P02770 P05183 P08683 P46462 P51538 Q06884 Q64550 Q6NYB7 Q9WVB1	GO_MF
Cluster3	steroid binding	6	37	164	19964	19.74	5.28e-07	G3V635 P02650 P05183 P51538 Q06884 Q64550	GO_MF
Cluster3	steroid hydroxylase activity	6	37	103	19964	31.43	3.32e-08	G3V635 P05183 P08683 P13107 P51538 Q06884	GO_MF
Cluster3	sterol binding	1	37	71	19964	7.6	0.124	P02650	GO_MF
Cluster3	sterol esterase activity	2	37	18	19964	59.95	0.000502	P16303 Q64573	GO_MF
Cluster3	sterol transporter activity	1	37	34	19964	15.87	0.0612	P02650	GO_MF
Cluster3	structural molecule activity	1	37	1074	19964	0.5	0.871	P02650	GO_MF
Cluster3	sulfur compound binding	2	37	414	19964	2.61	0.179	P02650 Q3KR94	GO_MF
Cluster3	tau protein binding	1	37	40	19964	13.49	0.0716	P02650	GO_MF
Cluster3	testosterone 16-alpha-hydroxylase activity	5	37	14	19964	192.7	3.26e-11	G3V635 P05183 P08683 P51538 Q06884	GO_MF
Cluster3	testosterone 6-beta-hydroxylase activity	4	37	11	19964	196.21	3.26e-09	G3V635 P05183 P51538 Q06884	GO_MF
Cluster3	tetrapyrrole binding	1	37	151	19964	3.57	0.245	P13107	GO_MF
Cluster3	thyroid hormone transmembrane transporter activity	1	37	18	19964	29.98	0.0329	O35913	GO_MF
Cluster3	toxic substance binding	1	37	26	19964	20.75	0.0471	P02770	GO_MF
Cluster3	transferase activity	4	37	3070	19964	0.7	0.842	D4A8N1 P08542 Q09325 Q64550	GO_MF
Cluster3	transferase activity, transferring glycosyl groups	4	37	317	19964	6.81	0.00273	D4A8N1 P08542 Q09325 Q64550	GO_MF
Cluster3	transferase activity, transferring hexosyl groups	4	37	228	19964	9.47	0.000814	D4A8N1 P08542 Q09325 Q64550	GO_MF
Cluster3	transition metal ion binding	6	37	804	19964	4.03	0.00335	G3V635 G3V7K3 P02770 P05183 P51538 Q06884	GO_MF
Cluster3	transmembrane transporter activity	2	37	1610	19964	0.67	0.811	M0R890 O35913	GO_MF
Cluster3	transporter activity	3	37	1854	19964	0.87	0.681	M0R890 O35913 P02650	GO_MF
Cluster3	triglyceride lipase activity	2	37	39	19964	27.67	0.00237	P16303 Q64573	GO_MF
Cluster3	ubiquitin protein ligase binding	1	37	505	19964	1.07	0.613	P46462	GO_MF
Cluster3	ubiquitin-like protein ligase binding	1	37	523	19964	1.03	0.626	P46462	GO_MF
Cluster3	ubiquitin-specific protease binding	1	37	26	19964	20.75	0.0471	P46462	GO_MF
Cluster3	vitamin B6 binding	1	37	48	19964	11.24	0.0853	P02770	GO_MF
Cluster3	vitamin D 24-hydroxylase activity	4	37	13	19964	166.02	7.05e-09	G3V635 P05183 P51538 Q06884	GO_MF
Cluster3	vitamin D 25-hydroxylase activity	4	37	14	19964	154.16	9.86e-09	G3V635 P05183 P51538 Q06884	GO_MF
Cluster3	vitamin D3 25-hydroxylase activity	4	37	14	19964	154.16	9.86e-09	G3V635 P05183 P51538 Q06884	GO_MF
Cluster3	vitamin binding	1	37	123	19964	4.39	0.205	P02770	GO_MF
Cluster3	zinc ion binding	1	37	538	19964	1	0.636	P02770	GO_MF
Cluster4	2 iron, 2 sulfur cluster binding	1	45	24	19964	18.49	0.0527	P21913	GO_MF
Cluster4	2,4-dienoyl-CoA reductase (NADPH) activity	1	45	3	19964	147.88	0.00675	G3V734	GO_MF
Cluster4	3 iron, 4 sulfur cluster binding	1	45	4	19964	110.91	0.00899	P21913	GO_MF
Cluster4	3-hydroxyacyl-CoA dehydrogenase activity	1	45	14	19964	31.69	0.0311	B0BMW2	GO_MF
Cluster4	3-hydroxybutyrate dehydrogenase activity	1	45	4	19964	110.91	0.00899	P29147	GO_MF
Cluster4	4 iron, 4 sulfur cluster binding	2	45	16	19964	55.46	0.000584	P21913 Q66HF3	GO_MF
Cluster4	ADP binding	2	45	67	19964	13.24	0.01	P10860 P15999	GO_MF
Cluster4	ATP binding	2	45	600	19964	1.48	0.394	G3V6D3 P15999	GO_MF
Cluster4	ATPase activity	5	45	598	19964	3.71	0.0108	G3V6D3 G3V7Y3 G3V887 P15999 Q06647	GO_MF
Cluster4	ATPase activity, coupled	4	45	482	19964	3.68	0.0229	G3V6D3 G3V7Y3 G3V887 P15999	GO_MF
Cluster4	ATPase activity, coupled to movement of substances	4	45	209	19964	8.49	0.00124	G3V6D3 G3V7Y3 G3V887 P15999	GO_MF
Cluster4	ATPase binding	1	45	184	19964	2.41	0.341	G3V887	GO_MF
Cluster4	C-acetyltransferase activity	1	45	11	19964	40.33	0.0245	P17764	GO_MF
Cluster4	C-acyltransferase activity	1	45	33	19964	13.44	0.0718	P17764	GO_MF
Cluster4	GDP binding	1	45	105	19964	4.23	0.211	P13086	GO_MF
Cluster4	GTP binding	1	45	250	19964	1.77	0.433	P10860	GO_MF
Cluster4	L-amino acid transmembrane transporter activity	1	45	83	19964	5.35	0.171	F1LZW6	GO_MF
Cluster4	L-aspartate transmembrane transporter activity	1	45	8	19964	55.46	0.0179	F1LZW6	GO_MF
Cluster4	L-glutamate transmembrane transporter activity	1	45	26	19964	17.06	0.057	F1LZW6	GO_MF
Cluster4	MHC class I protein binding	2	45	39	19964	22.75	0.00349	G3V6D3 P15999	GO_MF
Cluster4	MHC protein binding	2	45	55	19964	16.13	0.00684	G3V6D3 P15999	GO_MF
Cluster4	NAD binding	3	45	61	19964	21.82	0.000352	B0BMW2 P10860 Q5BJZ3	GO_MF
Cluster4	NAD(P)+ transhydrogenase (AB-specific) activity	1	45	1	19964	443.64	0.00225	Q5BJZ3	GO_MF
Cluster4	NAD(P)+ transhydrogenase (B-specific) activity	1	45	1	19964	443.64	0.00225	Q5BJZ3	GO_MF
Cluster4	NAD(P)+ transhydrogenase activity	1	45	2	19964	221.82	0.0045	Q5BJZ3	GO_MF
Cluster4	NAD+ binding	1	45	11	19964	40.33	0.0245	P10860	GO_MF
Cluster4	NADH dehydrogenase (quinone) activity	3	45	56	19964	23.77	0.000273	B0BNE6 Q561S0 Q63362	GO_MF
Cluster4	NADH dehydrogenase (ubiquinone) activity	3	45	56	19964	23.77	0.000273	B0BNE6 Q561S0 Q63362	GO_MF
Cluster4	NADH dehydrogenase activity	3	45	58	19964	22.95	0.000303	B0BNE6 Q561S0 Q63362	GO_MF
Cluster4	NADP binding	2	45	66	19964	13.44	0.00972	G3V734 Q5BJZ3	GO_MF
Cluster4	NADPH binding	1	45	17	19964	26.1	0.0377	G3V734	GO_MF
Cluster4	RNA binding	1	45	1237	19964	0.36	0.944	B0BMW2	GO_MF
Cluster4	S-acyltransferase activity	1	45	10	19964	44.36	0.0223	G3V6P2	GO_MF
Cluster4	S-succinyltransferase activity	1	45	2	19964	221.82	0.0045	G3V6P2	GO_MF
Cluster4	SH3 domain binding	1	45	183	19964	2.42	0.34	P04041	GO_MF
Cluster4	SNAP receptor activity	1	45	57	19964	7.78	0.121	Q9Z2Q7	GO_MF
Cluster4	SNARE binding	1	45	216	19964	2.05	0.387	Q9Z2Q7	GO_MF
Cluster4	acetoacetyl-CoA reductase activity	1	45	2	19964	221.82	0.0045	B0BMW2	GO_MF
Cluster4	acetyl-CoA C-acetyltransferase activity	1	45	10	19964	44.36	0.0223	P17764	GO_MF
Cluster4	acetyl-CoA C-acyltransferase activity	1	45	18	19964	24.65	0.0398	P17764	GO_MF
Cluster4	acetyltransferase activity	1	45	113	19964	3.93	0.226	P17764	GO_MF
Cluster4	acid phosphatase activity	1	45	13	19964	34.13	0.0289	P20611	GO_MF
Cluster4	acid-thiol ligase activity	1	45	40	19964	11.09	0.0864	P13086	GO_MF
Cluster4	active ion transmembrane transporter activity	4	45	106	19964	16.74	9.46e-05	G3V6D3 G3V7Y3 G3V887 P15999	GO_MF
Cluster4	active transmembrane transporter activity	7	45	557	19964	5.58	0.000229	G3V6D3 G3V6H5 G3V741 G3V7Y3 G3V887 O89035 P15999	GO_MF
Cluster4	acyl-CoA dehydrogenase activity	1	45	27	19964	16.43	0.0591	Q5M9H2	GO_MF
Cluster4	adenyl nucleotide binding	4	45	730	19964	2.43	0.0813	G3V6D3 P10860 P15999 Q5M9H2	GO_MF
Cluster4	adenyl ribonucleotide binding	4	45	716	19964	2.48	0.077	G3V6D3 P10860 P15999 Q5M9H2	GO_MF
Cluster4	amide binding	2	45	689	19964	1.29	0.463	B0BMW2 Q5M9H2	GO_MF
Cluster4	amino acid binding	2	45	113	19964	7.85	0.0268	P00507 P10860	GO_MF
Cluster4	amino acid transmembrane transporter activity	1	45	120	19964	3.7	0.238	F1LZW6	GO_MF
Cluster4	angiostatin binding	2	45	8	19964	110.91	0.000138	G3V6D3 P15999	GO_MF
Cluster4	anion binding	9	45	2306	19964	1.73	0.069	G3V6D3 G3V734 P00507 P10860 P13086 P15999 P29147 Q5M9H2 Q66HF3	GO_MF
Cluster4	anion transmembrane transporter activity	7	45	540	19964	5.75	0.00019	F1LZW6 G3V6H5 G3V741 O89035 P32089 P38718 P63031	GO_MF
Cluster4	anion:anion antiporter activity	1	45	45	19964	9.86	0.0967	G3V6H5	GO_MF
Cluster4	antibiotic transporter activity	1	45	15	19964	29.58	0.0333	P32089	GO_MF
Cluster4	antioxidant activity	2	45	114	19964	7.78	0.0273	P04041 P24473	GO_MF
Cluster4	antiporter activity	2	45	116	19964	7.65	0.0282	G3V6H5 O89035	GO_MF
Cluster4	beta-amyloid binding	1	45	128	19964	3.47	0.252	B0BMW2	GO_MF
Cluster4	binding	30	45	14341	19964	0.93	0.827	B0BMW2 F1LZW6 F1M953 G3V6D3 G3V6P2 G3V734 G3V741 G3V7Y3 G3V887 P00507 P04041 P10860 P13086 P14562 P15999 P17764 P20611 P21913 P24473 P29147 P32551 Q06647 Q5BJZ3 Q5M9H2 Q66HF3 Q68FY0 Q6IFW6 Q6IMF3 Q6PCT8 Q9Z2Q7	GO_MF
Cluster4	calcium ion binding	2	45	564	19964	1.57	0.364	F1LZW6 G3V6D3	GO_MF
Cluster4	carbohydrate binding	1	45	244	19964	1.82	0.425	Q6IMF3	GO_MF
Cluster4	carbohydrate derivative binding	5	45	1506	19964	1.47	0.25	G3V6D3 P10860 P13086 P15999 Q5M9H2	GO_MF
Cluster4	carbon-carbon lyase activity	1	45	59	19964	7.52	0.125	P17764	GO_MF
Cluster4	carboxylic acid binding	2	45	340	19964	2.61	0.178	P00507 P10860	GO_MF
Cluster4	carboxylic acid transmembrane transporter activity	6	45	254	19964	10.48	2.15e-05	F1LZW6 G3V6H5 O89035 P32089 P38718 P63031	GO_MF
Cluster4	cargo receptor activity	1	45	100	19964	4.44	0.202	G3V6D3	GO_MF
Cluster4	catalytic activity	32	45	7542	19964	1.88	5.76e-06	B0BMT9 B0BMW2 B0BNE6 G3V6D3 G3V6P2 G3V734 G3V7Y3 G3V887 P00507 P04041 P10860 P11240 P13086 P15999 P17764 P20611 P21913 P24473 P29147 P32551 Q06647 Q561S0 Q5BJZ3 Q5M9H2 Q63362 Q66HF3 Q68FT3 Q68FY0 Q6P7S1 Q6PCT8 Q6UPE0 Q920L2	GO_MF
Cluster4	cation binding	5	45	1708	19964	1.3	0.34	F1LZW6 G3V6D3 P10860 P32551 Q68FY0	GO_MF
Cluster4	cation transmembrane transporter activity	7	45	1047	19964	2.97	0.00847	G3V6D3 G3V741 G3V7Y3 G3V887 P11240 P15999 Q5BJZ3	GO_MF
Cluster4	cation-transporting ATPase activity	4	45	102	19964	17.4	8.15e-05	G3V6D3 G3V7Y3 G3V887 P15999	GO_MF
Cluster4	ceramidase activity	1	45	6	19964	73.94	0.0135	Q6P7S1	GO_MF
Cluster4	channel inhibitor activity	1	45	73	19964	6.08	0.152	Q9Z2Q7	GO_MF
Cluster4	channel regulator activity	1	45	229	19964	1.94	0.405	Q9Z2Q7	GO_MF
Cluster4	chaperone binding	2	45	166	19964	5.35	0.0539	F1M953 G3V6P2	GO_MF
Cluster4	chloride channel inhibitor activity	1	45	20	19964	22.18	0.0441	Q9Z2Q7	GO_MF
Cluster4	chloride channel regulator activity	1	45	35	19964	12.68	0.076	Q9Z2Q7	GO_MF
Cluster4	cholate 7-alpha-dehydrogenase activity	1	45	2	19964	221.82	0.0045	B0BMW2	GO_MF
Cluster4	choline dehydrogenase activity	1	45	1	19964	443.64	0.00225	Q6UPE0	GO_MF
Cluster4	citrate transmembrane transporter activity	1	45	6	19964	73.94	0.0135	P32089	GO_MF
Cluster4	coenzyme binding	8	45	330	19964	10.76	6.48e-07	B0BMW2 G3V734 P00507 P10860 P17764 Q5BJZ3 Q5M9H2 Q66HF3	GO_MF
Cluster4	cofactor binding	10	45	553	19964	8.02	3.27e-07	B0BMW2 G3V734 P00507 P10860 P17764 P21913 Q5BJZ3 Q5M9H2 Q66HF3 Q6PCT8	GO_MF
Cluster4	cytochrome-c oxidase activity	1	45	22	19964	20.17	0.0485	P11240	GO_MF
Cluster4	drug binding	4	45	1043	19964	1.7	0.207	G3V6D3 P00507 P15999 Q06647	GO_MF
Cluster4	drug transmembrane transporter activity	3	45	156	19964	8.53	0.00522	F1LZW6 O89035 P32089	GO_MF
Cluster4	electron carrier activity	4	45	125	19964	14.2	0.000179	P11240 Q66HF3 Q68FY0 Q920L2	GO_MF
Cluster4	endopeptidase activity	2	45	513	19964	1.73	0.322	P32551 Q68FY0	GO_MF
Cluster4	enzyme binding	8	45	3826	19964	0.93	0.653	F1M953 G3V887 P00507 P10860 P14562 P17764 Q68FY0 Q9Z2Q7	GO_MF
Cluster4	estradiol 17-beta-dehydrogenase activity	1	45	22	19964	20.17	0.0485	B0BMW2	GO_MF
Cluster4	estrogen receptor binding	1	45	77	19964	5.76	0.16	B0BMW2	GO_MF
Cluster4	fatty acid derivative binding	1	45	54	19964	8.22	0.115	Q5M9H2	GO_MF
Cluster4	fatty-acyl-CoA binding	1	45	33	19964	13.44	0.0718	Q5M9H2	GO_MF
Cluster4	fibroblast growth factor binding	1	45	44	19964	10.08	0.0946	F1M953	GO_MF
Cluster4	flavin adenine dinucleotide binding	2	45	101	19964	8.79	0.0218	Q5M9H2 Q66HF3	GO_MF
Cluster4	glutamate dehydrogenase (NAD+) activity	1	45	1	19964	443.64	0.00225	P10860	GO_MF
Cluster4	glutamate dehydrogenase [NAD(P)+] activity	1	45	1	19964	443.64	0.00225	P10860	GO_MF
Cluster4	glutathione peroxidase activity	2	45	27	19964	32.86	0.00168	P04041 P24473	GO_MF
Cluster4	glutathione transferase activity	1	45	51	19964	8.7	0.109	P24473	GO_MF
Cluster4	growth factor binding	1	45	246	19964	1.8	0.428	F1M953	GO_MF
Cluster4	guanyl nucleotide binding	2	45	304	19964	2.92	0.15	P10860 P13086	GO_MF
Cluster4	guanyl ribonucleotide binding	2	45	299	19964	2.97	0.146	P10860 P13086	GO_MF
Cluster4	heat shock protein binding	2	45	220	19964	4.03	0.0879	F1M953 G3V6P2	GO_MF
Cluster4	heme binding	1	45	142	19964	3.12	0.275	Q6PCT8	GO_MF
Cluster4	heme-copper terminal oxidase activity	1	45	22	19964	20.17	0.0485	P11240	GO_MF
Cluster4	heterocyclic compound binding	11	45	4573	19964	1.07	0.46	B0BMW2 G3V6D3 G3V734 P00507 P10860 P13086 P15999 Q5BJZ3 Q5M9H2 Q66HF3 Q6PCT8	GO_MF
Cluster4	hormone receptor binding	1	45	320	19964	1.39	0.517	B0BMW2	GO_MF
Cluster4	hydrogen ion transmembrane transporter activity	7	45	150	19964	20.7	4.2e-08	G3V6D3 G3V741 G3V7Y3 G3V887 P11240 P15999 Q5BJZ3	GO_MF
Cluster4	hydrogen-exporting ATPase activity	2	45	36	19964	24.65	0.00298	G3V6D3 G3V887	GO_MF
Cluster4	hydrolase activity	9	45	3128	19964	1.28	0.266	G3V6D3 G3V7Y3 G3V887 P15999 P20611 P32551 Q06647 Q68FY0 Q6P7S1	GO_MF
Cluster4	hydrolase activity, acting on acid anhydrides	5	45	1010	19964	2.2	0.0756	G3V6D3 G3V7Y3 G3V887 P15999 Q06647	GO_MF
Cluster4	hydrolase activity, acting on ester bonds	1	45	1008	19964	0.44	0.903	P20611	GO_MF
Cluster4	identical protein binding	4	45	3108	19964	0.57	0.935	B0BMW2 F1LZW6 P00507 P17764	GO_MF
Cluster4	inorganic anion transmembrane transporter activity	2	45	241	19964	3.68	0.103	G3V741 O89035	GO_MF
Cluster4	ion antiporter activity	1	45	94	19964	4.72	0.192	G3V6H5	GO_MF
Cluster4	ion binding	12	45	3447	19964	1.54	0.0756	F1LZW6 G3V6D3 G3V734 P00507 P10860 P13086 P15999 P29147 P32551 Q5M9H2 Q66HF3 Q68FY0	GO_MF
Cluster4	ion channel inhibitor activity	1	45	68	19964	6.52	0.142	Q9Z2Q7	GO_MF
Cluster4	ion channel regulator activity	1	45	171	19964	2.59	0.321	Q9Z2Q7	GO_MF
Cluster4	ion transmembrane transporter activity	13	45	1388	19964	4.16	7.49e-06	F1LZW6 G3V6D3 G3V6H5 G3V741 G3V7Y3 G3V887 O89035 P11240 P15999 P32089 P38718 P63031 Q5BJZ3	GO_MF
Cluster4	iron-sulfur cluster binding	2	45	41	19964	21.64	0.00385	P21913 Q66HF3	GO_MF
Cluster4	leucine binding	1	45	7	19964	63.38	0.0157	P10860	GO_MF
Cluster4	ligase activity	2	45	205	19964	4.33	0.0779	P13086 P17764	GO_MF
Cluster4	ligase activity, forming carbon-carbon bonds	1	45	15	19964	29.58	0.0333	P17764	GO_MF
Cluster4	ligase activity, forming carbon-sulfur bonds	1	45	52	19964	8.53	0.111	P13086	GO_MF
Cluster4	lipid binding	4	45	993	19964	1.79	0.184	B0BMW2 P00507 P29147 Q06647	GO_MF
Cluster4	lipoprotein particle receptor activity	1	45	36	19964	12.32	0.0781	G3V6D3	GO_MF
Cluster4	long-chain-acyl-CoA dehydrogenase activity	1	45	6	19964	73.94	0.0135	Q5M9H2	GO_MF
Cluster4	lyase activity	1	45	205	19964	2.16	0.372	P17764	GO_MF
Cluster4	macromolecular complex binding	5	45	1875	19964	1.18	0.417	G3V741 G3V7Y3 P32551 Q06647 Q68FY0	GO_MF
Cluster4	malate transmembrane transporter activity	2	45	3	19964	295.76	1.49e-05	G3V6H5 O89035	GO_MF
Cluster4	metal cluster binding	2	45	41	19964	21.64	0.00385	P21913 Q66HF3	GO_MF
Cluster4	metal ion binding	4	45	1549	19964	1.15	0.466	F1LZW6 G3V6D3 P32551 Q68FY0	GO_MF
Cluster4	metalloendopeptidase activity	2	45	119	19964	7.46	0.0295	P32551 Q68FY0	GO_MF
Cluster4	metallopeptidase activity	2	45	226	19964	3.93	0.092	P32551 Q68FY0	GO_MF
Cluster4	molecular function regulator	1	45	2563	19964	0.17	0.998	Q9Z2Q7	GO_MF
Cluster4	molecular transducer activity	1	45	2141	19964	0.21	0.994	Q6IMF3	GO_MF
Cluster4	neurotransmitter transporter activity	1	45	75	19964	5.92	0.156	F1LZW6	GO_MF
Cluster4	nuclear hormone receptor binding	1	45	282	19964	1.57	0.473	B0BMW2	GO_MF
Cluster4	nucleic acid binding	1	45	3246	19964	0.14	1	B0BMW2	GO_MF
Cluster4	nucleoside binding	2	45	285	19964	3.11	0.135	P10860 P13086	GO_MF
Cluster4	nucleoside phosphate binding	9	45	1268	19964	3.15	0.00181	B0BMW2 G3V6D3 G3V734 P10860 P13086 P15999 Q5BJZ3 Q5M9H2 Q66HF3	GO_MF
Cluster4	nucleoside-triphosphatase activity	5	45	949	19964	2.34	0.0612	G3V6D3 G3V7Y3 G3V887 P15999 Q06647	GO_MF
Cluster4	nucleotide binding	9	45	1267	19964	3.15	0.0018	B0BMW2 G3V6D3 G3V734 P10860 P13086 P15999 Q5BJZ3 Q5M9H2 Q66HF3	GO_MF
Cluster4	organic acid binding	2	45	349	19964	2.54	0.186	P00507 P10860	GO_MF
Cluster4	organic acid transmembrane transporter activity	6	45	254	19964	10.48	2.15e-05	F1LZW6 G3V6H5 O89035 P32089 P38718 P63031	GO_MF
Cluster4	organic anion transmembrane transporter activity	6	45	369	19964	7.21	0.00017	F1LZW6 G3V6H5 O89035 P32089 P38718 P63031	GO_MF
Cluster4	organic cyclic compound binding	12	45	4701	19964	1.13	0.365	B0BMW2 G3V6D3 G3V734 P00507 P10860 P13086 P15999 Q06647 Q5BJZ3 Q5M9H2 Q66HF3 Q6PCT8	GO_MF
Cluster4	oxaloacetate transmembrane transporter activity	1	45	1	19964	443.64	0.00225	O89035	GO_MF
Cluster4	oxidoreductase activity	20	45	1099	19964	8.07	4.69e-14	B0BMT9 B0BMW2 B0BNE6 G3V734 P04041 P10860 P11240 P21913 P24473 P29147 Q561S0 Q5BJZ3 Q5M9H2 Q63362 Q66HF3 Q68FT3 Q68FY0 Q6PCT8 Q6UPE0 Q920L2	GO_MF
Cluster4	oxidoreductase activity, acting on NAD(P)H	5	45	159	19964	13.95	2.84e-05	B0BNE6 G3V734 Q561S0 Q5BJZ3 Q63362	GO_MF
Cluster4	oxidoreductase activity, oxidizing metal ions	1	45	22	19964	20.17	0.0485	Q66HF3	GO_MF
Cluster4	oxoglutarate:malate antiporter activity	1	45	2	19964	221.82	0.0045	G3V6H5	GO_MF
Cluster4	peptidase activity	2	45	783	19964	1.13	0.532	P32551 Q68FY0	GO_MF
Cluster4	peptide binding	1	45	608	19964	0.73	0.752	B0BMW2	GO_MF
Cluster4	peroxidase activity	2	45	57	19964	15.57	0.00733	P04041 P24473	GO_MF
Cluster4	phosphatase activity	1	45	382	19964	1.16	0.581	P20611	GO_MF
Cluster4	phosphate ion transmembrane transporter activity	2	45	26	19964	34.13	0.00156	G3V741 O89035	GO_MF
Cluster4	phosphate:proton symporter activity	1	45	3	19964	147.88	0.00675	G3V741	GO_MF
Cluster4	phospholipid binding	2	45	595	19964	1.49	0.39	P00507 P29147	GO_MF
Cluster4	phosphoprotein binding	1	45	168	19964	2.64	0.317	P20611	GO_MF
Cluster4	phosphoprotein phosphatase activity	1	45	240	19964	1.85	0.42	P20611	GO_MF
Cluster4	phosphoric ester hydrolase activity	1	45	534	19964	0.83	0.705	P20611	GO_MF
Cluster4	phosphotyrosine binding	1	45	69	19964	6.43	0.144	P20611	GO_MF
Cluster4	primary active transmembrane transporter activity	4	45	197	19964	9.01	0.000999	G3V6D3 G3V7Y3 G3V887 P15999	GO_MF
Cluster4	protein binding	19	45	10452	19964	0.81	0.935	B0BMW2 F1LZW6 F1M953 G3V6D3 G3V6P2 G3V887 P00507 P04041 P10860 P13086 P14562 P15999 P17764 P20611 P24473 Q68FY0 Q6IFW6 Q6IMF3 Q9Z2Q7	GO_MF
Cluster4	protein dimerization activity	5	45	2135	19964	1.04	0.535	P00507 P13086 P17764 Q6IFW6 Q6IMF3	GO_MF
Cluster4	protein domain specific binding	2	45	1353	19964	0.66	0.819	P04041 P14562	GO_MF
Cluster4	protein heterodimerization activity	3	45	914	19964	1.46	0.34	P13086 Q6IFW6 Q6IMF3	GO_MF
Cluster4	protein homodimerization activity	2	45	1530	19964	0.58	0.869	P00507 P17764	GO_MF
Cluster4	protein phosphorylated amino acid binding	1	45	83	19964	5.35	0.171	P20611	GO_MF
Cluster4	purine nucleoside binding	2	45	276	19964	3.21	0.128	P10860 P13086	GO_MF
Cluster4	purine nucleotide binding	5	45	1008	19964	2.2	0.0751	G3V6D3 P10860 P13086 P15999 Q5M9H2	GO_MF
Cluster4	purine ribonucleoside binding	2	45	271	19964	3.27	0.124	P10860 P13086	GO_MF
Cluster4	purine ribonucleoside triphosphate binding	3	45	832	19964	1.6	0.289	G3V6D3 P10860 P15999	GO_MF
Cluster4	purine ribonucleotide binding	5	45	982	19964	2.26	0.0688	G3V6D3 P10860 P13086 P15999 Q5M9H2	GO_MF
Cluster4	pyridoxal phosphate binding	1	45	47	19964	9.44	0.101	P00507	GO_MF
Cluster4	pyrophosphatase activity	5	45	1007	19964	2.2	0.0749	G3V6D3 G3V7Y3 G3V887 P15999 Q06647	GO_MF
Cluster4	pyruvate transmembrane transporter activity	2	45	6	19964	147.88	7.41e-05	P38718 P63031	GO_MF
Cluster4	quinone binding	3	45	16	19964	83.18	5.87e-06	P21913 Q66HF3 Q6PCT8	GO_MF
Cluster4	receptor binding	4	45	2633	19964	0.67	0.862	B0BMW2 G3V6D3 P15999 P24473	GO_MF
Cluster4	ribonucleoside binding	2	45	273	19964	3.25	0.126	P10860 P13086	GO_MF
Cluster4	ribonucleotide binding	5	45	1009	19964	2.2	0.0754	G3V6D3 P10860 P13086 P15999 Q5M9H2	GO_MF
Cluster4	signaling receptor activity	1	45	2127	19964	0.21	0.994	Q6IMF3	GO_MF
Cluster4	small molecule binding	10	45	1840	19964	2.41	0.00686	B0BMW2 G3V6D3 G3V734 P00507 P10860 P13086 P15999 Q5BJZ3 Q5M9H2 Q66HF3	GO_MF
Cluster4	solute:cation symporter activity	1	45	186	19964	2.39	0.344	G3V741	GO_MF
Cluster4	solute:proton symporter activity	1	45	37	19964	11.99	0.0802	G3V741	GO_MF
Cluster4	steroid binding	2	45	164	19964	5.41	0.0528	B0BMW2 Q06647	GO_MF
Cluster4	steroid dehydrogenase activity	1	45	58	19964	7.65	0.123	B0BMW2	GO_MF
Cluster4	steroid hormone receptor binding	1	45	164	19964	2.71	0.31	B0BMW2	GO_MF
Cluster4	structural constituent of epidermis	2	45	10	19964	88.73	0.000221	Q6IFW6 Q6IMF3	GO_MF
Cluster4	structural molecule activity	2	45	1074	19964	0.83	0.705	Q6IFW6 Q6IMF3	GO_MF
Cluster4	succinate dehydrogenase (ubiquinone) activity	2	45	3	19964	295.76	1.49e-05	P21913 Q920L2	GO_MF
Cluster4	succinate dehydrogenase activity	3	45	4	19964	332.73	4.27e-08	P21913 Q6PCT8 Q920L2	GO_MF
Cluster4	succinate transmembrane transporter activity	1	45	5	19964	88.73	0.0112	O89035	GO_MF
Cluster4	succinate-CoA ligase (ADP-forming) activity	1	45	3	19964	147.88	0.00675	P13086	GO_MF
Cluster4	succinate-CoA ligase (GDP-forming) activity	1	45	3	19964	147.88	0.00675	P13086	GO_MF
Cluster4	succinate-CoA ligase activity	1	45	4	19964	110.91	0.00899	P13086	GO_MF
Cluster4	succinyltransferase activity	1	45	7	19964	63.38	0.0157	G3V6P2	GO_MF
Cluster4	sulfate transmembrane transporter activity	1	45	19	19964	23.35	0.042	O89035	GO_MF
Cluster4	sulfide:quinone oxidoreductase activity	1	45	2	19964	221.82	0.0045	B0BMT9	GO_MF
Cluster4	sulfur compound binding	1	45	414	19964	1.07	0.611	Q5M9H2	GO_MF
Cluster4	sulfur compound transmembrane transporter activity	1	45	42	19964	10.56	0.0905	O89035	GO_MF
Cluster4	symporter activity	1	45	188	19964	2.36	0.347	G3V741	GO_MF
Cluster4	syntaxin binding	1	45	147	19964	3.02	0.283	Q9Z2Q7	GO_MF
Cluster4	tRNA binding	1	45	64	19964	6.93	0.135	B0BMW2	GO_MF
Cluster4	testosterone dehydrogenase [NAD(P)] activity	1	45	13	19964	34.13	0.0289	B0BMW2	GO_MF
Cluster4	tetrapyrrole binding	1	45	151	19964	2.94	0.29	Q6PCT8	GO_MF
Cluster4	thiosulfate transmembrane transporter activity	1	45	1	19964	443.64	0.00225	O89035	GO_MF
Cluster4	transaminase activity	1	45	33	19964	13.44	0.0718	P00507	GO_MF
Cluster4	transcription factor binding	1	45	1112	19964	0.4	0.924	B0BMW2	GO_MF
Cluster4	transferase activity	4	45	3070	19964	0.58	0.931	G3V6P2 P00507 P17764 P24473	GO_MF
Cluster4	transferase activity, transferring acyl groups	2	45	304	19964	2.92	0.15	G3V6P2 P17764	GO_MF
Cluster4	transition metal ion binding	2	45	804	19964	1.1	0.546	P32551 Q68FY0	GO_MF
Cluster4	transmembrane transporter activity	15	45	1610	19964	4.13	1.26e-06	F1LZW6 G3V6D3 G3V6H5 G3V741 G3V7Y3 G3V887 O89035 P11240 P15999 P29419 P32089 P38718 P63031 Q06647 Q5BJZ3	GO_MF
Cluster4	transporter activity	15	45	1854	19964	3.59	7.28e-06	F1LZW6 G3V6D3 G3V6H5 G3V741 G3V7Y3 G3V887 O89035 P11240 P15999 P29419 P32089 P38718 P63031 Q06647 Q5BJZ3	GO_MF
Cluster4	ubiquinol-cytochrome-c reductase activity	1	45	7	19964	63.38	0.0157	Q68FY0	GO_MF
Cluster4	ubiquinone binding	3	45	10	19964	133.09	1.27e-06	P21913 Q66HF3 Q6PCT8	GO_MF
Cluster4	ubiquitin protein ligase binding	3	45	505	19964	2.64	0.105	F1M953 Q68FY0 Q9Z2Q7	GO_MF
Cluster4	ubiquitin-like protein ligase binding	3	45	523	19964	2.54	0.113	F1M953 Q68FY0 Q9Z2Q7	GO_MF
Cluster4	very-long-chain-acyl-CoA dehydrogenase activity	1	45	4	19964	110.91	0.00899	Q5M9H2	GO_MF
Cluster4	vitamin B6 binding	1	45	48	19964	9.24	0.103	P00507	GO_MF
Cluster4	vitamin binding	1	45	123	19964	3.61	0.243	P00507	GO_MF
Cluster4	zinc ion binding	2	45	538	19964	1.65	0.343	P32551 Q68FY0	GO_MF
Cluster5	(S)-2-hydroxy-acid oxidase activity	1	24	3	19964	277.28	0.0036	B0BNF9	GO_MF
Cluster5	A1 adenosine receptor binding	1	24	8	19964	103.98	0.00958	P63018	GO_MF
Cluster5	ADP binding	1	24	67	19964	12.42	0.0776	P63018	GO_MF
Cluster5	ATP binding	1	24	600	19964	1.39	0.519	P63018	GO_MF
Cluster5	ATPase activity	2	24	598	19964	2.78	0.161	P63018 Q64119	GO_MF
Cluster5	ATPase activity, coupled	2	24	482	19964	3.45	0.113	P63018 Q64119	GO_MF
Cluster5	ATPase binding	1	24	184	19964	4.52	0.199	Q6RUV5	GO_MF
Cluster5	C-acetyltransferase activity	1	24	11	19964	75.62	0.0131	P21775	GO_MF
Cluster5	C-acyltransferase activity	1	24	33	19964	25.21	0.0389	P21775	GO_MF
Cluster5	C3HC4-type RING finger domain binding	1	24	13	19964	63.99	0.0155	P63018	GO_MF
Cluster5	CoA hydrolase activity	1	24	40	19964	20.8	0.047	Q9ES71	GO_MF
Cluster5	CoA-transferase activity	1	24	6	19964	138.64	0.00719	P21775	GO_MF
Cluster5	D-amino-acid oxidase activity	1	24	3	19964	277.28	0.0036	O35078	GO_MF
Cluster5	FAD binding	1	24	33	19964	25.21	0.0389	O35078	GO_MF
Cluster5	FFAT motif binding	1	24	3	19964	277.28	0.0036	Q9Z269	GO_MF
Cluster5	FMN binding	1	24	23	19964	36.17	0.0273	B0BNF9	GO_MF
Cluster5	G-protein coupled receptor binding	2	24	423	19964	3.93	0.0911	O35796 P63018	GO_MF
Cluster5	GDP-dissociation inhibitor binding	1	24	13	19964	63.99	0.0155	Q6RUV5	GO_MF
Cluster5	GTP binding	1	24	250	19964	3.33	0.261	Q6RUV5	GO_MF
Cluster5	GTP-dependent protein binding	1	24	35	19964	23.77	0.0413	Q6RUV5	GO_MF
Cluster5	GTPase activity	1	24	299	19964	2.78	0.304	Q6RUV5	GO_MF
Cluster5	GTPase binding	1	24	921	19964	0.9	0.678	Q6RUV5	GO_MF
Cluster5	NAD binding	1	24	61	19964	13.64	0.0709	O35077	GO_MF
Cluster5	NADP binding	1	24	66	19964	12.6	0.0764	P04762	GO_MF
Cluster5	O-acetyltransferase activity	1	24	10	19964	83.18	0.012	Q9ES71	GO_MF
Cluster5	O-acyltransferase activity	1	24	72	19964	11.55	0.0831	Q9ES71	GO_MF
Cluster5	RNA binding	2	24	1237	19964	1.34	0.443	O35796 P63018	GO_MF
Cluster5	Rab GTPase binding	1	24	263	19964	3.16	0.273	Q6RUV5	GO_MF
Cluster5	Ras GTPase binding	1	24	753	19964	1.1	0.603	Q6RUV5	GO_MF
Cluster5	Rho GDP-dissociation inhibitor binding	1	24	8	19964	103.98	0.00958	Q6RUV5	GO_MF
Cluster5	acetate CoA-transferase activity	1	24	3	19964	277.28	0.0036	P21775	GO_MF
Cluster5	acetyl-CoA C-acetyltransferase activity	1	24	10	19964	83.18	0.012	P21775	GO_MF
Cluster5	acetyl-CoA C-acyltransferase activity	1	24	18	19964	46.21	0.0214	P21775	GO_MF
Cluster5	acetyltransferase activity	2	24	113	19964	14.72	0.00808	P21775 Q9ES71	GO_MF
Cluster5	actin-dependent ATPase activity	1	24	25	19964	33.27	0.0296	Q64119	GO_MF
Cluster5	acyl-CoA dehydrogenase activity	1	24	27	19964	30.81	0.032	F1M9A7	GO_MF
Cluster5	acyl-CoA hydrolase activity	1	24	35	19964	23.77	0.0413	Q9ES71	GO_MF
Cluster5	acyl-CoA oxidase activity	2	24	13	19964	127.97	0.000107	F1M9A7 P21775	GO_MF
Cluster5	adenosine receptor binding	1	24	16	19964	51.99	0.0191	P63018	GO_MF
Cluster5	adenyl nucleotide binding	1	24	730	19964	1.14	0.591	P63018	GO_MF
Cluster5	adenyl ribonucleotide binding	1	24	716	19964	1.16	0.584	P63018	GO_MF
Cluster5	adrenergic receptor binding	1	24	46	19964	18.08	0.0539	O35796	GO_MF
Cluster5	amide binding	2	24	689	19964	2.41	0.2	F7F2H5 P63018	GO_MF
Cluster5	aminoacylase activity	1	24	9	19964	92.43	0.0108	P04762	GO_MF
Cluster5	anion binding	9	24	2306	19964	3.25	0.000929	B0BNF9 F1M9A7 F7F2H5 O35078 O35796 P63018 Q6P7C7 Q6RUV5 Q8CHM7	GO_MF
Cluster5	antioxidant activity	2	24	114	19964	14.59	0.00822	P04762 P57113	GO_MF
Cluster5	beta-tubulin binding	1	24	61	19964	13.64	0.0709	Q9Z269	GO_MF
Cluster5	binding	20	24	14341	19964	1.16	0.152	B0BNF9 F1M9A7 F7F2H5 O35077 O35078 O35796 P04762 P57113 P63018 P63102 P80299 P84817 Q3MIB4 Q5M884 Q6P7C7 Q6RUV5 Q8CHM7 Q9ES71 Q9JJK4 Q9Z269	GO_MF
Cluster5	binding, bridging	1	24	308	19964	2.7	0.312	P63018	GO_MF
Cluster5	carbohydrate derivative binding	5	24	1506	19964	2.76	0.0309	B0BNF9 O35796 P63018 Q6P7C7 Q6RUV5	GO_MF
Cluster5	carbon-carbon lyase activity	1	24	59	19964	14.1	0.0686	Q8CHM7	GO_MF
Cluster5	carboxylic acid binding	3	24	340	19964	7.34	0.0076	F1M9A7 O35796 P63018	GO_MF
Cluster5	catalase activity	1	24	3	19964	277.28	0.0036	P04762	GO_MF
Cluster5	catalytic activity	17	24	7542	19964	1.87	0.00104	B0BNF9 F1M9A7 F7F2H5 O35077 O35078 P04762 P09118 P21775 P57113 P63018 P80299 Q3MIB4 Q5M884 Q64119 Q6RUV5 Q8CHM7 Q9ES71	GO_MF
Cluster5	cation binding	2	24	1708	19964	0.97	0.621	P80299 Q8CHM7	GO_MF
Cluster5	cell adhesion molecule binding	1	24	391	19964	2.13	0.378	Q6P7C7	GO_MF
Cluster5	channel activity	1	24	725	19964	1.15	0.589	Q07066	GO_MF
Cluster5	chaperone binding	1	24	166	19964	5.01	0.182	P63018	GO_MF
Cluster5	chemoattractant activity	1	24	57	19964	14.59	0.0664	Q6P7C7	GO_MF
Cluster5	cis-trans isomerase activity	1	24	46	19964	18.08	0.0539	P57113	GO_MF
Cluster5	clathrin-uncoating ATPase activity	1	24	5	19964	166.37	0.006	P63018	GO_MF
Cluster5	coenzyme binding	6	24	330	19964	15.12	2.04e-06	B0BNF9 F1M9A7 O35077 O35078 P04762 Q8CHM7	GO_MF
Cluster5	cofactor binding	7	24	553	19964	10.53	2.77e-06	B0BNF9 F1M9A7 F7F2H5 O35077 O35078 P04762 Q8CHM7	GO_MF
Cluster5	complement binding	1	24	42	19964	19.81	0.0493	O35796	GO_MF
Cluster5	complement component C1q binding	1	24	15	19964	55.46	0.0179	O35796	GO_MF
Cluster5	cytoskeletal protein binding	1	24	1382	19964	0.6	0.821	Q9Z269	GO_MF
Cluster5	dodecenoyl-CoA delta-isomerase activity	1	24	6	19964	138.64	0.00719	Q5M884	GO_MF
Cluster5	drug binding	2	24	1043	19964	1.6	0.359	F7F2H5 P63018	GO_MF
Cluster5	enzyme binding	7	24	3826	19964	1.52	0.161	O35796 P04762 P63018 P63102 Q3MIB4 Q6RUV5 Q9Z269	GO_MF
Cluster5	epoxide hydrolase activity	1	24	10	19964	83.18	0.012	P80299	GO_MF
Cluster5	ether hydrolase activity	1	24	15	19964	55.46	0.0179	P80299	GO_MF
Cluster5	fatty acid binding	2	24	91	19964	18.28	0.00531	F1M9A7 P63018	GO_MF
Cluster5	fatty acid derivative binding	1	24	54	19964	15.4	0.063	P63018	GO_MF
Cluster5	flavin adenine dinucleotide binding	2	24	101	19964	16.47	0.0065	F1M9A7 O35078	GO_MF
Cluster5	glutathione binding	1	24	36	19964	23.11	0.0424	F7F2H5	GO_MF
Cluster5	glutathione peroxidase activity	1	24	27	19964	30.81	0.032	P57113	GO_MF
Cluster5	glutathione transferase activity	2	24	51	19964	32.62	0.0017	F7F2H5 P57113	GO_MF
Cluster5	glycerol-3-phosphate dehydrogenase [NAD+] activity	1	24	6	19964	138.64	0.00719	O35077	GO_MF
Cluster5	glycerol-3-phosphate dehydrogenase activity	1	24	5	19964	166.37	0.006	O35077	GO_MF
Cluster5	glycerone-phosphate O-acyltransferase activity	1	24	1	19964	831.83	0.0012	Q9ES71	GO_MF
Cluster5	glycolate oxidase activity	1	24	1	19964	831.83	0.0012	B0BNF9	GO_MF
Cluster5	glycosaminoglycan binding	2	24	350	19964	4.75	0.0657	O35796 Q6P7C7	GO_MF
Cluster5	glyoxylate oxidase activity	1	24	1	19964	831.83	0.0012	B0BNF9	GO_MF
Cluster5	guanyl nucleotide binding	1	24	304	19964	2.74	0.308	Q6RUV5	GO_MF
Cluster5	guanyl ribonucleotide binding	1	24	299	19964	2.78	0.304	Q6RUV5	GO_MF
Cluster5	heat shock protein binding	1	24	220	19964	3.78	0.234	P63018	GO_MF
Cluster5	heme binding	1	24	142	19964	5.86	0.158	P04762	GO_MF
Cluster5	heparin binding	1	24	251	19964	3.31	0.262	Q6P7C7	GO_MF
Cluster5	heterocyclic compound binding	9	24	4573	19964	1.64	0.0773	B0BNF9 F1M9A7 O35077 O35078 O35796 P04762 P63018 Q6RUV5 Q8CHM7	GO_MF
Cluster5	histone deacetylase binding	1	24	201	19964	4.14	0.216	Q6RUV5	GO_MF
Cluster5	hyaluronic acid binding	1	24	39	19964	21.33	0.0459	O35796	GO_MF
Cluster5	hydrolase activity	8	24	3128	19964	2.13	0.0253	P04762 P57113 P63018 P80299 Q3MIB4 Q64119 Q6RUV5 Q9ES71	GO_MF
Cluster5	hydrolase activity, acting on acid anhydrides	3	24	1010	19964	2.47	0.119	P63018 Q64119 Q6RUV5	GO_MF
Cluster5	hydrolase activity, acting on acid halide bonds	1	24	3	19964	277.28	0.0036	P57113	GO_MF
Cluster5	hydrolase activity, acting on ester bonds	2	24	1008	19964	1.65	0.344	P80299 Q9ES71	GO_MF
Cluster5	hydrolase activity, acting on ether bonds	1	24	16	19964	51.99	0.0191	P80299	GO_MF
Cluster5	icosanoid binding	1	24	24	19964	34.66	0.0285	P63018	GO_MF
Cluster5	identical protein binding	6	24	3108	19964	1.61	0.159	P04762 P57113 P63102 P80299 Q8CHM7 Q9Z269	GO_MF
Cluster5	integrin binding	1	24	226	19964	3.68	0.239	Q6P7C7	GO_MF
Cluster5	intramolecular oxidoreductase activity	1	24	76	19964	10.95	0.0875	Q5M884	GO_MF
Cluster5	ion binding	10	24	3447	19964	2.41	0.00433	B0BNF9 F1M9A7 F7F2H5 O35078 O35796 P63018 P80299 Q6P7C7 Q6RUV5 Q8CHM7	GO_MF
Cluster5	ion channel binding	1	24	245	19964	3.4	0.257	P63102	GO_MF
Cluster5	isomerase activity	2	24	200	19964	8.32	0.0238	P57113 Q5M884	GO_MF
Cluster5	kinase binding	3	24	1318	19964	1.89	0.209	O35796 P63102 Q6RUV5	GO_MF
Cluster5	kininogen binding	1	24	19	19964	43.78	0.0226	O35796	GO_MF
Cluster5	lipid binding	3	24	993	19964	2.51	0.114	F1M9A7 P63018 Q9JJK4	GO_MF
Cluster5	lipid phosphatase activity	1	24	19	19964	43.78	0.0226	P80299	GO_MF
Cluster5	lyase activity	1	24	205	19964	4.06	0.22	Q8CHM7	GO_MF
Cluster5	mRNA binding	1	24	363	19964	2.29	0.356	O35796	GO_MF
Cluster5	macromolecular complex binding	4	24	1875	19964	1.77	0.184	O35796 P63102 P84817 Q6P7C7	GO_MF
Cluster5	magnesium ion binding	1	24	246	19964	3.38	0.258	P80299	GO_MF
Cluster5	maleylacetoacetate isomerase activity	1	24	2	19964	415.92	0.0024	P57113	GO_MF
Cluster5	metal ion binding	1	24	1549	19964	0.54	0.856	P80299	GO_MF
Cluster5	microfilament motor activity	1	24	46	19964	18.08	0.0539	Q64119	GO_MF
Cluster5	microtubule binding	1	24	347	19964	2.4	0.344	Q9Z269	GO_MF
Cluster5	mitochondrial ribosome binding	1	24	4	19964	207.96	0.0048	O35796	GO_MF
Cluster5	modified amino acid binding	2	24	138	19964	12.06	0.0119	F7F2H5 P63018	GO_MF
Cluster5	molecular function regulator	1	24	2563	19964	0.32	0.963	Q6P7C7	GO_MF
Cluster5	monocarboxylic acid binding	2	24	140	19964	11.88	0.0122	F1M9A7 P63018	GO_MF
Cluster5	motor activity	1	24	159	19964	5.23	0.175	Q64119	GO_MF
Cluster5	nucleic acid binding	2	24	3246	19964	0.51	0.92	O35796 P63018	GO_MF
Cluster5	nucleoside binding	1	24	285	19964	2.92	0.292	Q6RUV5	GO_MF
Cluster5	nucleoside phosphate binding	7	24	1268	19964	4.59	0.000544	B0BNF9 F1M9A7 O35077 O35078 P04762 P63018 Q6RUV5	GO_MF
Cluster5	nucleoside-triphosphatase activity	3	24	949	19964	2.63	0.103	P63018 Q64119 Q6RUV5	GO_MF
Cluster5	nucleotide binding	7	24	1267	19964	4.6	0.000542	B0BNF9 F1M9A7 O35077 O35078 P04762 P63018 Q6RUV5	GO_MF
Cluster5	oligopeptide binding	1	24	38	19964	21.89	0.0447	F7F2H5	GO_MF
Cluster5	opsonin binding	1	24	24	19964	34.66	0.0285	O35796	GO_MF
Cluster5	organic acid binding	3	24	349	19964	7.15	0.00816	F1M9A7 O35796 P63018	GO_MF
Cluster5	organic cyclic compound binding	9	24	4701	19964	1.59	0.0894	B0BNF9 F1M9A7 O35077 O35078 O35796 P04762 P63018 Q6RUV5 Q8CHM7	GO_MF
Cluster5	oxidoreductase activity	8	24	1099	19964	6.06	2.74e-05	B0BNF9 F1M9A7 O35077 O35078 P04762 P09118 P21775 P57113	GO_MF
Cluster5	palmitoyl-CoA hydrolase activity	1	24	22	19964	37.81	0.0261	Q9ES71	GO_MF
Cluster5	palmitoyl-CoA oxidase activity	1	24	7	19964	118.83	0.00839	P21775	GO_MF
Cluster5	passive transmembrane transporter activity	1	24	726	19964	1.15	0.589	Q07066	GO_MF
Cluster5	peptidase activity	1	24	783	19964	1.06	0.617	Q3MIB4	GO_MF
Cluster5	peptide binding	2	24	608	19964	2.74	0.165	F7F2H5 P63018	GO_MF
Cluster5	peroxidase activity	2	24	57	19964	29.19	0.00212	P04762 P57113	GO_MF
Cluster5	phosphatase activity	1	24	382	19964	2.18	0.371	P80299	GO_MF
Cluster5	phosphatidylserine binding	1	24	77	19964	10.8	0.0886	P63018	GO_MF
Cluster5	phospholipid binding	1	24	595	19964	1.4	0.516	P63018	GO_MF
Cluster5	phosphoric ester hydrolase activity	1	24	534	19964	1.56	0.479	P80299	GO_MF
Cluster5	pristanoyl-CoA oxidase activity	1	24	6	19964	138.64	0.00719	F1M9A7	GO_MF
Cluster5	prostaglandin binding	1	24	5	19964	166.37	0.006	P63018	GO_MF
Cluster5	protease binding	1	24	270	19964	3.08	0.279	Q3MIB4	GO_MF
Cluster5	protein binding	18	24	10452	19964	1.43	0.0201	B0BNF9 F1M9A7 O35078 O35796 P04762 P57113 P63018 P63102 P80299 P84817 Q3MIB4 Q5M884 Q6P7C7 Q6RUV5 Q8CHM7 Q9ES71 Q9JJK4 Q9Z269	GO_MF
Cluster5	protein binding, bridging	1	24	281	19964	2.96	0.289	P63018	GO_MF
Cluster5	protein dimerization activity	6	24	2135	19964	2.34	0.0369	O35078 P04762 P57113 P80299 Q9JJK4 Q9Z269	GO_MF
Cluster5	protein domain specific binding	3	24	1353	19964	1.84	0.22	P63018 P63102 Q9Z269	GO_MF
Cluster5	protein heterodimerization activity	1	24	914	19964	0.91	0.675	Q9Z269	GO_MF
Cluster5	protein homodimerization activity	4	24	1530	19964	2.17	0.107	P04762 P57113 P80299 Q9Z269	GO_MF
Cluster5	protein kinase C binding	1	24	114	19964	7.3	0.128	O35796	GO_MF
Cluster5	protein kinase binding	3	24	1179	19964	2.12	0.166	O35796 P63102 Q6RUV5	GO_MF
Cluster5	proteoglycan binding	1	24	72	19964	11.55	0.0831	Q6P7C7	GO_MF
Cluster5	purine nucleoside binding	1	24	276	19964	3.01	0.284	Q6RUV5	GO_MF
Cluster5	purine nucleotide binding	2	24	1008	19964	1.65	0.344	P63018 Q6RUV5	GO_MF
Cluster5	purine ribonucleoside binding	1	24	271	19964	3.07	0.28	Q6RUV5	GO_MF
Cluster5	purine ribonucleoside triphosphate binding	2	24	832	19964	2	0.264	P63018 Q6RUV5	GO_MF
Cluster5	purine ribonucleotide binding	2	24	982	19964	1.69	0.332	P63018 Q6RUV5	GO_MF
Cluster5	pyrophosphatase activity	3	24	1007	19964	2.48	0.118	P63018 Q64119 Q6RUV5	GO_MF
Cluster5	receptor agonist activity	1	24	539	19964	1.54	0.482	Q6P7C7	GO_MF
Cluster5	receptor binding	13	24	2633	19964	4.11	2.14e-06	B0BNF9 F1M9A7 O35078 O35796 P04762 P63018 P80299 P84817 Q3MIB4 Q5M884 Q6P7C7 Q8CHM7 Q9ES71	GO_MF
Cluster5	receptor regulator activity	1	24	583	19964	1.43	0.509	Q6P7C7	GO_MF
Cluster5	ribonucleoprotein complex binding	1	24	196	19964	4.24	0.211	O35796	GO_MF
Cluster5	ribonucleoside binding	1	24	273	19964	3.05	0.282	Q6RUV5	GO_MF
Cluster5	ribonucleotide binding	3	24	1009	19964	2.47	0.119	B0BNF9 P63018 Q6RUV5	GO_MF
Cluster5	ribosome binding	1	24	70	19964	11.88	0.0809	O35796	GO_MF
Cluster5	small GTPase binding	1	24	785	19964	1.06	0.618	Q6RUV5	GO_MF
Cluster5	small molecule binding	9	24	1840	19964	4.07	0.000171	B0BNF9 F1M9A7 O35077 O35078 O35796 P04762 P63018 Q6RUV5 Q8CHM7	GO_MF
Cluster5	structural constituent of muscle	1	24	85	19964	9.79	0.0974	Q64119	GO_MF
Cluster5	structural molecule activity	1	24	1074	19964	0.77	0.735	Q64119	GO_MF
Cluster5	sulfur compound binding	3	24	414	19964	6.03	0.013	F7F2H5 Q6P7C7 Q8CHM7	GO_MF
Cluster5	syndecan binding	1	24	14	19964	59.42	0.0167	Q6P7C7	GO_MF
Cluster5	tetrapyrrole binding	1	24	151	19964	5.51	0.167	P04762	GO_MF
Cluster5	thiamine pyrophosphate binding	1	24	4	19964	207.96	0.0048	Q8CHM7	GO_MF
Cluster5	thioesterase binding	1	24	15	19964	55.46	0.0179	Q6RUV5	GO_MF
Cluster5	thiolester hydrolase activity	1	24	64	19964	13	0.0742	Q9ES71	GO_MF
Cluster5	toxic substance binding	1	24	26	19964	31.99	0.0308	P80299	GO_MF
Cluster5	trans-2-enoyl-CoA reductase (NADPH) activity	1	24	8	19964	103.98	0.00958	P04762	GO_MF
Cluster5	transcription cofactor activity	1	24	814	19964	1.02	0.632	O35796	GO_MF
Cluster5	transcription corepressor activity	1	24	343	19964	2.43	0.34	O35796	GO_MF
Cluster5	transcription factor binding	3	24	1112	19964	2.24	0.147	O35796 P63018 P63102	GO_MF
Cluster5	transferase activity	4	24	3070	19964	1.08	0.516	F7F2H5 P21775 P57113 Q9ES71	GO_MF
Cluster5	transferase activity, transferring acyl groups	2	24	304	19964	5.47	0.0512	P21775 Q9ES71	GO_MF
Cluster5	transmembrane transporter activity	1	24	1610	19964	0.52	0.867	Q07066	GO_MF
Cluster5	transporter activity	1	24	1854	19964	0.45	0.904	Q07066	GO_MF
Cluster5	tubulin binding	1	24	482	19964	1.73	0.444	Q9Z269	GO_MF
Cluster5	ubiquitin protein ligase binding	2	24	505	19964	3.29	0.122	P63018 P63102	GO_MF
Cluster5	ubiquitin-like protein ligase binding	2	24	523	19964	3.18	0.13	P63018 P63102	GO_MF
Cluster5	unfolded protein binding	1	24	141	19964	5.9	0.157	P63018	GO_MF
Cluster5	urate oxidase activity	1	24	1	19964	831.83	0.0012	P09118	GO_MF
Cluster5	vitamin binding	1	24	123	19964	6.76	0.138	Q8CHM7	GO_MF
Cluster6	5.8S rRNA binding	2	23	12	19964	144.67	8.32e-05	P29314 P62278	GO_MF
Cluster6	DNA N-glycosylase activity	1	23	22	19964	39.45	0.0251	P62909	GO_MF
Cluster6	DNA binding	1	23	2204	19964	0.39	0.932	P62909	GO_MF
Cluster6	DNA-(apurinic or apyrimidinic site) lyase activity	1	23	12	19964	72.33	0.0137	P62909	GO_MF
Cluster6	Hsp70 protein binding	1	23	82	19964	10.59	0.0904	P62909	GO_MF
Cluster6	Hsp90 protein binding	1	23	76	19964	11.42	0.084	P62909	GO_MF
Cluster6	RNA binding	6	23	1237	19964	4.21	0.00226	P13471 P29314 P62083 P62278 P62832 P62909	GO_MF
Cluster6	SNARE binding	1	23	216	19964	4.02	0.221	Q63584	GO_MF
Cluster6	UDP-glycosyltransferase activity	1	23	171	19964	5.08	0.18	Q68G19	GO_MF
Cluster6	amide binding	1	23	689	19964	1.26	0.554	P19945	GO_MF
Cluster6	aminoacyl-tRNA hydrolase activity	1	23	5	19964	173.6	0.00575	Q5XI86	GO_MF
Cluster6	arachidonic acid epoxygenase activity	2	23	72	19964	24.11	0.00309	P15149 P24470	GO_MF
Cluster6	arachidonic acid monooxygenase activity	2	23	77	19964	22.55	0.00352	P15149 P24470	GO_MF
Cluster6	binding	15	23	14341	19964	0.91	0.827	A0JPQ8 B5DFC3 D4A6G6 G3V6S3 P02761 P13471 P19945 P29314 P62083 P62278 P62832 P62909 Q62902 Q63584 Q9R0T3	GO_MF
Cluster6	calcium ion binding	2	23	564	19964	3.08	0.137	G3V6S3 Q62902	GO_MF
Cluster6	carbohydrate binding	1	23	244	19964	3.56	0.246	Q62902	GO_MF
Cluster6	carboxylic ester hydrolase activity	1	23	194	19964	4.47	0.201	Q5XI86	GO_MF
Cluster6	catalytic activity	9	23	7542	19964	1.04	0.525	A0JPQ8 D3ZZC1 P02761 P15149 P24470 P62909 Q5XI86 Q63688 Q68G19	GO_MF
Cluster6	cation binding	4	23	1708	19964	2.03	0.129	A0JPQ8 B5DFC3 G3V6S3 Q62902	GO_MF
Cluster6	chaperone binding	1	23	166	19964	5.23	0.175	Q9R0T3	GO_MF
Cluster6	cytoskeletal protein binding	1	23	1382	19964	0.63	0.808	P62909	GO_MF
Cluster6	damaged DNA binding	1	23	82	19964	10.59	0.0904	P62909	GO_MF
Cluster6	deoxyribonuclease activity	1	23	71	19964	12.23	0.0787	P62909	GO_MF
Cluster6	double-stranded DNA binding	1	23	1315	19964	0.66	0.792	P62909	GO_MF
Cluster6	endodeoxyribonuclease activity	1	23	45	19964	19.29	0.0506	P62909	GO_MF
Cluster6	endonuclease activity	1	23	125	19964	6.94	0.135	P62909	GO_MF
Cluster6	endopeptidase inhibitor activity	1	23	271	19964	3.2	0.27	D3ZFC6	GO_MF
Cluster6	endopeptidase regulator activity	1	23	281	19964	3.09	0.278	D3ZFC6	GO_MF
Cluster6	enzyme binding	5	23	3826	19964	1.13	0.458	G3V6S3 P62083 P62832 P62909 Q9R0T3	GO_MF
Cluster6	enzyme inhibitor activity	5	23	592	19964	7.33	0.000487	D3ZFC6 G3V6S3 P62083 P62832 Q9R0T3	GO_MF
Cluster6	enzyme regulator activity	5	23	1508	19964	2.88	0.0261	D3ZFC6 G3V6S3 P62083 P62832 Q9R0T3	GO_MF
Cluster6	glucuronosyltransferase activity	1	23	51	19964	17.02	0.0572	Q68G19	GO_MF
Cluster6	glyceryl-ether monooxygenase activity	1	23	1	19964	868	0.00115	A0JPQ8	GO_MF
Cluster6	heat shock protein binding	1	23	220	19964	3.95	0.225	P62909	GO_MF
Cluster6	heterocyclic compound binding	6	23	4573	19964	1.14	0.437	P13471 P29314 P62083 P62278 P62832 P62909	GO_MF
Cluster6	hydrolase activity	2	23	3128	19964	0.55	0.895	P62909 Q5XI86	GO_MF
Cluster6	hydrolase activity, acting on ester bonds	2	23	1008	19964	1.72	0.325	P62909 Q5XI86	GO_MF
Cluster6	hydrolase activity, acting on glycosyl bonds	1	23	168	19964	5.17	0.177	P62909	GO_MF
Cluster6	identical protein binding	1	23	3108	19964	0.28	0.98	Q62902	GO_MF
Cluster6	insulin-activated receptor activity	1	23	18	19964	48.22	0.0205	P02761	GO_MF
Cluster6	intramolecular oxidoreductase activity	1	23	76	19964	11.42	0.084	D3ZZC1	GO_MF
Cluster6	ion binding	4	23	3447	19964	1.01	0.579	A0JPQ8 B5DFC3 G3V6S3 Q62902	GO_MF
Cluster6	iron ion binding	1	23	133	19964	6.53	0.143	A0JPQ8	GO_MF
Cluster6	isomerase activity	1	23	200	19964	4.34	0.207	D3ZZC1	GO_MF
Cluster6	kinase activity	1	23	1248	19964	0.7	0.774	P02761	GO_MF
Cluster6	kinase binding	3	23	1318	19964	1.98	0.191	P62083 P62909 Q9R0T3	GO_MF
Cluster6	kinase inhibitor activity	1	23	139	19964	6.24	0.149	Q9R0T3	GO_MF
Cluster6	kinase regulator activity	1	23	343	19964	2.53	0.329	Q9R0T3	GO_MF
Cluster6	large ribosomal subunit rRNA binding	1	23	14	19964	62	0.016	P62832	GO_MF
Cluster6	mRNA 3'-UTR binding	1	23	108	19964	8.04	0.117	P62083	GO_MF
Cluster6	mRNA 5'-UTR binding	3	23	34	19964	76.59	7.81e-06	P13471 P62083 P62278	GO_MF
Cluster6	mRNA binding	4	23	363	19964	9.56	0.000724	P13471 P62083 P62278 P62909	GO_MF
Cluster6	macromolecular complex binding	2	23	1875	19964	0.93	0.65	P62909 Q63584	GO_MF
Cluster6	mannose binding	1	23	37	19964	23.46	0.0418	Q62902	GO_MF
Cluster6	mating pheromone activity	1	23	15	19964	57.87	0.0171	P02761	GO_MF
Cluster6	metal ion binding	4	23	1549	19964	2.24	0.0981	A0JPQ8 B5DFC3 G3V6S3 Q62902	GO_MF
Cluster6	microtubule binding	1	23	347	19964	2.5	0.332	P62909	GO_MF
Cluster6	misfolded protein binding	1	23	21	19964	41.33	0.0239	Q9R0T3	GO_MF
Cluster6	molecular function regulator	5	23	2563	19964	1.69	0.164	D3ZFC6 G3V6S3 P62083 P62832 Q9R0T3	GO_MF
Cluster6	molecular transducer activity	1	23	2141	19964	0.41	0.927	P02761	GO_MF
Cluster6	monooxygenase activity	4	23	189	19964	18.37	5.98e-05	A0JPQ8 P15149 P24470 Q63688	GO_MF
Cluster6	monosaccharide binding	1	23	111	19964	7.82	0.12	Q62902	GO_MF
Cluster6	nuclease activity	1	23	226	19964	3.84	0.23	P62909	GO_MF
Cluster6	nucleic acid binding	6	23	3246	19964	1.6	0.158	P13471 P29314 P62083 P62278 P62832 P62909	GO_MF
Cluster6	odorant binding	1	23	187	19964	4.64	0.195	P02761	GO_MF
Cluster6	organic cyclic compound binding	6	23	4701	19964	1.11	0.466	P13471 P29314 P62083 P62278 P62832 P62909	GO_MF
Cluster6	oxidized DNA binding	1	23	11	19964	78.91	0.0126	P62909	GO_MF
Cluster6	oxidized base lesion DNA N-glycosylase activity	1	23	6	19964	144.67	0.00689	P62909	GO_MF
Cluster6	oxidized purine DNA binding	1	23	10	19964	86.8	0.0115	P62909	GO_MF
Cluster6	oxidized pyrimidine DNA binding	1	23	2	19964	434	0.0023	P62909	GO_MF
Cluster6	oxidoreductase activity	4	23	1099	19964	3.16	0.035	A0JPQ8 P15149 P24470 Q63688	GO_MF
Cluster6	oxysterol 7-alpha-hydroxylase activity	1	23	4	19964	217	0.0046	Q63688	GO_MF
Cluster6	peptidase inhibitor activity	1	23	286	19964	3.03	0.283	D3ZFC6	GO_MF
Cluster6	peptidase regulator activity	1	23	343	19964	2.53	0.329	D3ZFC6	GO_MF
Cluster6	peptide binding	1	23	608	19964	1.43	0.509	P19945	GO_MF
Cluster6	pheromone activity	1	23	15	19964	57.87	0.0171	P02761	GO_MF
Cluster6	pheromone binding	1	23	15	19964	57.87	0.0171	P02761	GO_MF
Cluster6	poly(U) RNA binding	1	23	35	19964	24.8	0.0396	P62083	GO_MF
Cluster6	poly-pyrimidine tract binding	1	23	46	19964	18.87	0.0517	P62083	GO_MF
Cluster6	protein binding	9	23	10452	19964	0.75	0.931	D4A6G6 G3V6S3 P02761 P62083 P62832 P62909 Q62902 Q63584 Q9R0T3	GO_MF
Cluster6	protein disulfide isomerase activity	1	23	27	19964	32.15	0.0307	D3ZZC1	GO_MF
Cluster6	protein kinase A binding	1	23	101	19964	8.59	0.11	P62909	GO_MF
Cluster6	protein kinase activity	1	23	949	19964	0.91	0.674	P02761	GO_MF
Cluster6	protein kinase binding	3	23	1179	19964	2.21	0.152	P62083 P62909 Q9R0T3	GO_MF
Cluster6	protein kinase inhibitor activity	1	23	133	19964	6.53	0.143	Q9R0T3	GO_MF
Cluster6	protein kinase regulator activity	1	23	306	19964	2.84	0.299	Q9R0T3	GO_MF
Cluster6	protein tyrosine kinase activity	1	23	273	19964	3.18	0.272	P02761	GO_MF
Cluster6	protein-hormone receptor activity	1	23	35	19964	24.8	0.0396	P02761	GO_MF
Cluster6	rRNA binding	5	23	105	19964	41.33	1.14e-07	P13471 P29314 P62278 P62832 P62909	GO_MF
Cluster6	receptor binding	1	23	2633	19964	0.33	0.961	P02761	GO_MF
Cluster6	signaling receptor activity	1	23	2127	19964	0.41	0.925	P02761	GO_MF
Cluster6	single-stranded RNA binding	1	23	137	19964	6.34	0.147	P62083	GO_MF
Cluster6	small molecule binding	1	23	1840	19964	0.47	0.892	Q62902	GO_MF
Cluster6	small ribosomal subunit rRNA binding	3	23	11	19964	236.73	2.19e-07	P13471 P62278 P62909	GO_MF
Cluster6	steroid hydroxylase activity	3	23	103	19964	25.28	0.000219	P15149 P24470 Q63688	GO_MF
Cluster6	structural constituent of ribosome	8	23	355	19964	19.56	3.59e-09	D4A6G6 P13471 P19945 P29314 P62278 P62282 P62832 P62909	GO_MF
Cluster6	structural molecule activity	8	23	1074	19964	6.47	1.62e-05	D4A6G6 P13471 P19945 P29314 P62278 P62282 P62832 P62909	GO_MF
Cluster6	supercoiled DNA binding	1	23	20	19964	43.4	0.0228	P62909	GO_MF
Cluster6	syntaxin binding	1	23	147	19964	5.9	0.156	Q63584	GO_MF
Cluster6	transcription coactivator binding	1	23	32	19964	27.12	0.0362	P62832	GO_MF
Cluster6	transcription cofactor binding	1	23	74	19964	11.73	0.0819	P62832	GO_MF
Cluster6	transcription factor binding	2	23	1112	19964	1.56	0.369	P62832 P62909	GO_MF
Cluster6	transferase activity	2	23	3070	19964	0.57	0.889	P02761 Q68G19	GO_MF
Cluster6	transferase activity, transferring glycosyl groups	1	23	317	19964	2.74	0.308	Q68G19	GO_MF
Cluster6	transferase activity, transferring hexosyl groups	1	23	228	19964	3.81	0.232	Q68G19	GO_MF
Cluster6	transition metal ion binding	2	23	804	19964	2.16	0.236	A0JPQ8 B5DFC3	GO_MF
Cluster6	translation initiation factor binding	1	23	66	19964	13.15	0.0734	D4A6G6	GO_MF
Cluster6	translation regulator activity	2	23	71	19964	24.45	0.00301	P13471 P29314	GO_MF
Cluster6	transmembrane receptor protein kinase activity	1	23	145	19964	5.99	0.154	P02761	GO_MF
Cluster6	transmembrane signaling receptor activity	1	23	1797	19964	0.48	0.886	P02761	GO_MF
Cluster6	tubulin binding	1	23	482	19964	1.8	0.43	P62909	GO_MF
Cluster6	ubiquitin ligase inhibitor activity	2	23	9	19964	192.89	4.55e-05	P62083 P62832	GO_MF
Cluster6	ubiquitin protein ligase binding	1	23	505	19964	1.72	0.445	P62832	GO_MF
Cluster6	ubiquitin-like protein conjugating enzyme binding	1	23	61	19964	14.23	0.068	P62909	GO_MF
Cluster6	ubiquitin-like protein ligase binding	1	23	523	19964	1.66	0.457	P62832	GO_MF
Cluster6	ubiquitin-protein transferase inhibitor activity	2	23	10	19964	173.6	5.68e-05	P62083 P62832	GO_MF
Cluster6	ubiquitin-protein transferase regulator activity	2	23	21	19964	82.67	0.000263	P62083 P62832	GO_MF
Cluster6	unfolded protein binding	1	23	141	19964	6.16	0.151	Q62902	GO_MF
Cluster6	zinc ion binding	1	23	538	19964	1.61	0.467	B5DFC3	GO_MF
